# Supplementary material for: Straightforward chemo- and stereoselective fluorocyclopropanation of allylic alcohols: exploiting the electrophilic nature of the not so elusive fluoroiodomethyllithium
Source: Royal Society of Chemistry journal article supplement (doi:10.1039/c9cc03394g), 2019-01-01
Supplement: c9cc03394g1.pdf [file c9cc03394g1.pdf]

# Straightforward chemo- and stereoselective fluorocyclopropanation of allylic alcohols: exploiting the electrophilic nature of the not so elusive fluoroiodomethylithium

Marco Colella,<sup>a,‡</sup> Arianna Tota,<sup>a, ‡</sup> Angela Großjohann<sup>a</sup>, Claudia Carlucci,<sup>a</sup> Andrea Aramini,<sup>b</sup> Nadeem S. Sheikh,<sup>c,\*</sup> Leonardo Degennaro,<sup>a,\*</sup> and Renzo Luisi,<sup>a,\*</sup>

<sup>a</sup> Department of Pharmacy – Drug Sciences, University of Bari “A. Moro” Via E. Orabona 4 - 70125 Bari, Italy.

<sup>b</sup> Department of Discovery Dompé Farmaceutici S.p.A., Via Campo di Pile, L’Aquila 67100, Italy

<sup>c</sup> Department of Chemistry, College of Science, King Faisal University, P.O. Box 380, Al-Ahsa 31982, Saudi Arabia

[e-mail: renzo.luisi@uniba.it](mailto:renzo.luisi@uniba.it)

## Supporting Information

### Table of contents:

|                                                                                                                    |           |
|--------------------------------------------------------------------------------------------------------------------|-----------|
| 1. Instrumentation and General Analytical Methods                                                                  | S2        |
| 2. Optimization of the reaction conditions                                                                         | S3        |
| 3. General procedures for the preparation of allylic alcohols through:                                             | S4        |
| 3.1 Reduction of $\alpha,\beta$ -unsaturated aldehydes and ketones                                                 |           |
| 3.2 Reduction of $\alpha,\beta$ -unsaturated carboxylic acids                                                      |           |
| 3.3 Nucleophilic attack by organolithium to ketones                                                                |           |
| 4. Collection of allylic alcohols                                                                                  | S5 – S9   |
| 5. Assignment of stereochemistry of fluorocyclopropanes                                                            | S10       |
| 6. General procedure for the preparation of fluorocyclopropanes                                                    | S11       |
| 7. NMR data for fluorocyclopropanes                                                                                | S11 - S22 |
| 8. Synthesis of chiral allylic alcohol and fluorocyclopropane                                                      | S24 – S25 |
| 9. Computational Studies                                                                                           | S26 – S34 |
| 10. Copies of NMR Spectra ( <sup>1</sup> H, <sup>13</sup> C and <sup>19</sup> F) for All the Synthesized Compounds | S35       |

## 1. Instrumentation and General Analytical Methods

HRMS spectra were recorded on Agilent 6530 accurate mass Q-TOF instrument.  $^1\text{H}$ ,  $^{13}\text{C}$ ,  $^{19}\text{F}$  NMR spectra were recorded with an Agilent 500 spectrometer (500 MHz for  $^1\text{H}$ , 126 MHz for  $^{13}\text{C}$ , 470 MHz for  $^{19}\text{F}$ ), and a Varian Mercury 300 spectrometer (300 MHz for  $^1\text{H}$ , 75 MHz for  $^{13}\text{C}$ , 282 MHz for  $^{19}\text{F}$ ). Infrared spectra of the compounds were recorded by using a PerkinElmer 283 Spectrometer or by using attenuated total reflection spectrophotometer in reciprocal centimeter ( $\text{cm}^{-1}$ ). The center of the (residual) solvent signal was used as an internal standard which was related to TMS with  $\delta$  7.26 ppm ( $^1\text{H}$  in  $\text{CDCl}_3$ ),  $\delta$  77.00 ppm ( $^{13}\text{C}$  in  $\text{CDCl}_3$ ). Absolute referencing was used for the  $^{19}\text{F}$  NMR spectra. Spin-spin coupling constants ( $J$ ) are given in Hz. As far as possible, full and unambiguous assignment of all resonances was performed by combined application of standard NMR techniques, such as HSQC, COSY and NOESY experiments. The enantiomeric ratio was determined by using HPLC 1260 Infinity with DIODE detector.

THF was distilled over Na/benzophenone.

Fluoroiodomethane was purchased from ABCR GmbH Germany and it was stored at  $-20^\circ\text{C}$ . Lithium diisopropylamide [2 M in hexane/THF/ethylbenzene] was purchased from Sigma Aldrich. Other chemicals were purchased from Sigma-Aldrich, Alfa Aesar, Fluorochem and TCI Europe unless otherwise specified. Solutions were evaporated under reduced pressure with a rotary evaporator. TLC was carried out on aluminium sheets precoated with silica gel 60F254 (Merck); the spots were visualized under UV light ( $\lambda = 254$  nm) and/or  $\text{KMnO}_4$  (aq.) was used as revealing system.

## 2. Optimization of the reaction conditions

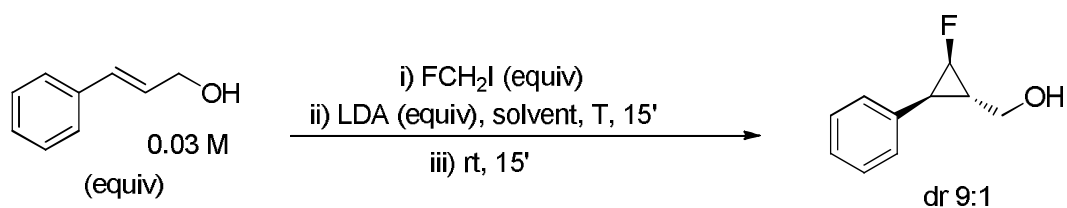

| Entry               | FCH <sub>2</sub> I (equiv) | LDA (equiv) | Alcohol (equiv) | Solvent                     | T(°C)  | Yield (%) <sup>[*]</sup> |
|---------------------|----------------------------|-------------|-----------------|-----------------------------|--------|--------------------------|
| 1                   | 4                          | 4           | 1               | THF : Et <sub>2</sub> O=1:2 | -78 °C | 21                       |
| 2                   | 4                          | 4           | 1               | THF                         | -78 °C | 31                       |
| 3                   | 4                          | 4           | 1               | Et <sub>2</sub> O           | -78 °C | 21                       |
| 4                   | 1                          | 3           | 2               | CPME                        | -78 °C | 14                       |
| 5                   | 4                          | 4           | 1               | Pentane                     | -78 °C | Traces                   |
| 6                   | 1                          | 3           | 2               | Toluene                     | -78 °C | Traces                   |
| 7                   | 1                          | 3           | 2               | 2-MeTHF                     | -50 °C | <10%                     |
| 8                   | 6                          | 6           | 1               | THF                         | -78 °C | 48                       |
| 9 <sup>[a]</sup>    | 6                          | 6           | 1               | THF                         | -78 °C | 35                       |
| 10 <sup>[b]</sup>   | 1                          | 3           | 2               | THF                         | -78 °C | 20                       |
| 11 <sup>[c]</sup>   | 4                          | 4           | 1               | THF                         | -78 °C | 28                       |
| 12 <sup>[d]</sup>   | 4                          | 4           | 1               | THF                         | -78 °C | Traces                   |
| 13 <sup>[e]</sup>   | 6                          | 6           | 1               | THF                         | -78 °C | /                        |
| 14 <sup>[f]</sup>   | 1                          | 3           | 2               | THF                         | -78 °C | 40                       |
| 15 <sup>[f]</sup>   | 1                          | 3           | 2               | THF                         | -98 °C | 40                       |
| 16 <sup>[f]</sup>   | 1                          | 3           | 2               | THF                         | -50 °C | 75                       |
| 17 <sup>[f]</sup>   | 1                          | 3           | 2               | THF                         | -20 °C | 33                       |
| 18 <sup>[f,g]</sup> | 1                          | 3           | 2               | THF                         | -78 °C | 22                       |
| 19 <sup>[h]</sup>   | 1                          | 3           | 2               | THF                         | -50 °C | 80                       |
| 20 <sup>[i]</sup>   | 1                          | 3           | 2               | THF                         | -50 °C | 37                       |
| 21                  | 1                          | 2           | 1               | THF                         | -78 °C | 38                       |

[\*] NMR yields calculated on the crude reaction mixture using mesitylene or hexafluorobenzene as internal standards; **[a]** Reaction time: 1.5 h at -78°C plus 0.25 h at rt; **[b]** Reaction quenched after 20 seconds; **[c]** Experiment performed adding FCH<sub>2</sub>I to preformed lithium alcoholate; **[d]** Reaction carried out adding a THF solution of FCH<sub>2</sub>I and cinnamyl alcohol to LDA; **[e]** Allylic alcohol added 1s after the LDA addition to FCH<sub>2</sub>I; **[f]** Reaction run using 2 equivalents of allylic alcohol (FCH<sub>2</sub>I as limiting reagent); **[g]** Reaction run using a concentration of 0.3 M for alcohol; **[h]** Reaction run using a concentration of 0.01 M for FCH<sub>2</sub>I; **[i]** Reaction run using a concentration of 0.005 M for FCH<sub>2</sub>I.

### **3. General procedures for the preparation of allylic alcohols through:**

#### **3.1 Reduction of $\alpha,\beta$ -unsaturated aldehydes and ketones**

In a round bottom flask containing  $\text{NaBH}_4$  (174 mg, 4.6 mmol, 1.15 equiv) at  $0^\circ\text{C}$ , a solution of aldehyde or ketone (4 mmol, 1 equiv) in absolute ethanol (10 mL) was added dropwise. After 30 min, sat. aqueous ammonium chloride and water were added. The resulting mixture was stirred at room temperature for additional 30 min, and diluted with dichloromethane (10 mL). The aqueous layer was extracted with dichloromethane (3 x 10 mL). The combined organic phases were washed with water (3 x 15 mL) and dried over  $\text{Na}_2\text{SO}_4$ . The solvent was removed under reduced pressure to afford the desired alcohol that was used without further purification.

#### **3.2 Reduction of $\alpha,\beta$ -unsaturated carboxylic acids**

Cinnamyl alcohols were synthesized from the correspondent cinnamic acids following the reported procedure.<sup>1</sup>

#### **3.3 Nucleophilic addition of organolithiums to ketones**

Allylic alcohols were prepared starting from corresponding ketone and alkyllithium according to the literature procedures.<sup>2</sup>

#### 4. Collection of allylic alcohols

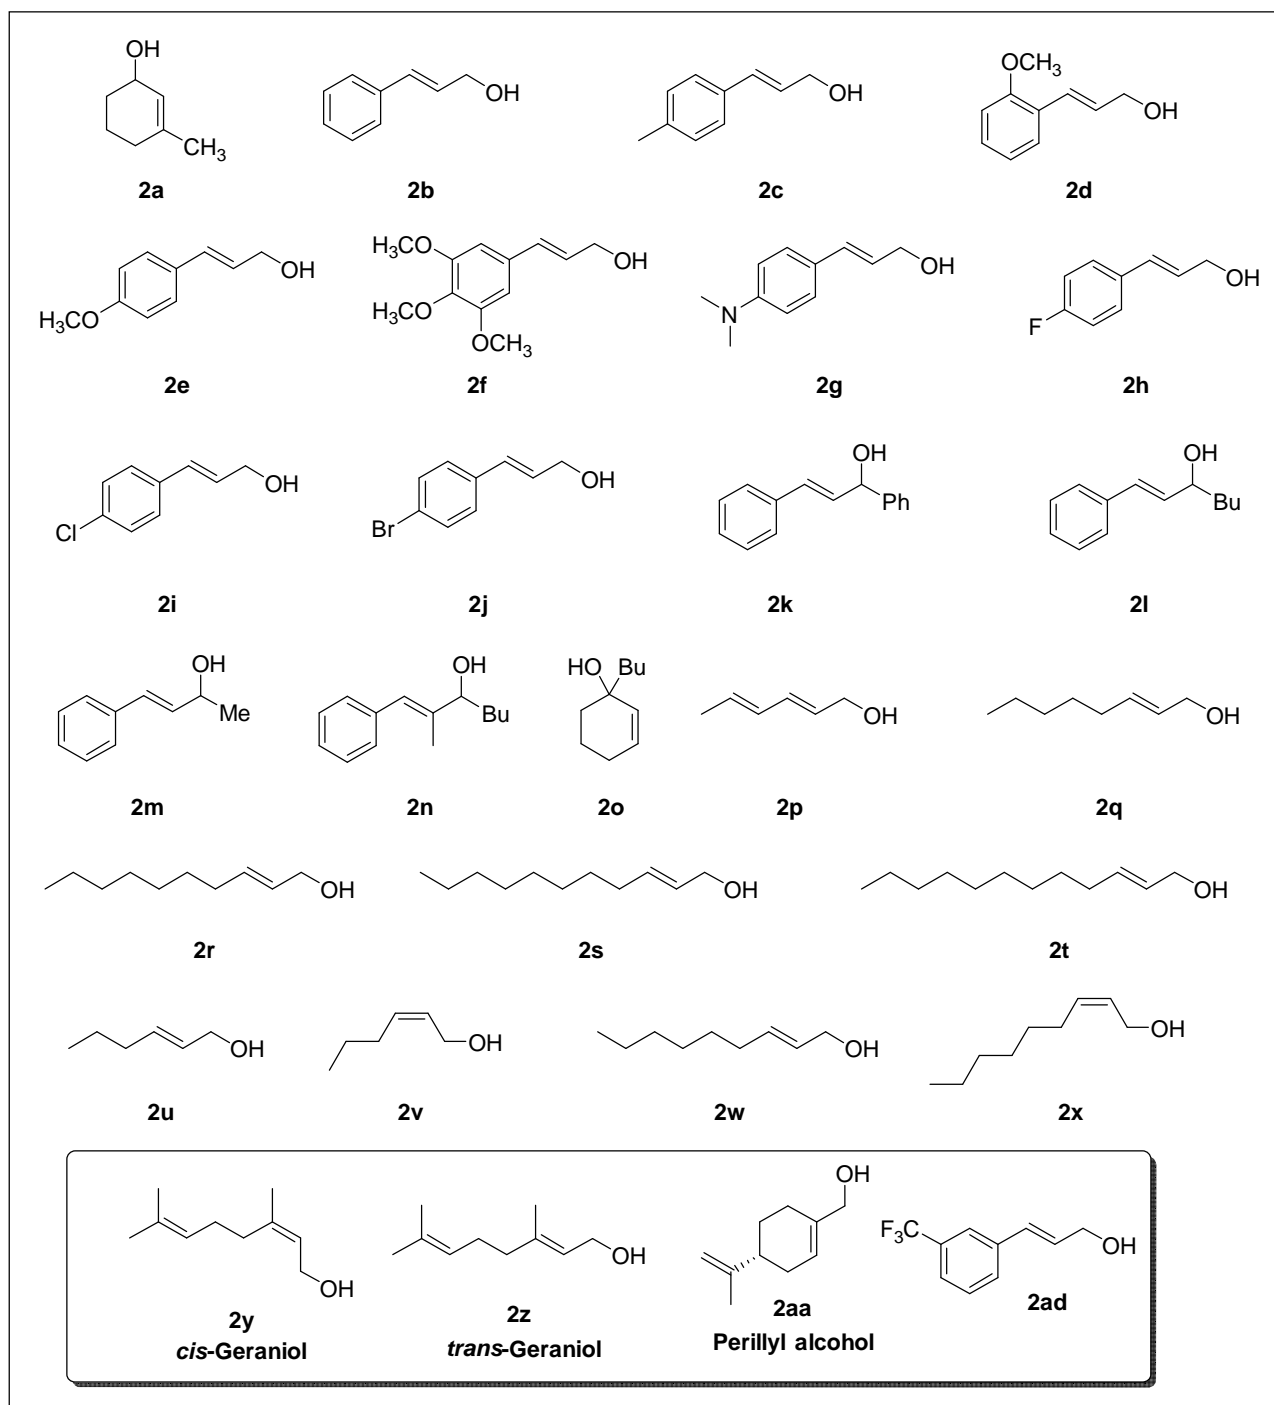

Scheme 1. Allylic alcohols

### 3-Methylcyclohex-2-enol (2a)

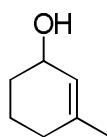

Prepared according to general procedure **3.1** to afford allylic alcohol **2a**.  $^1\text{H NMR}$  (500 MHz,  $\text{CDCl}_3$ )  $\delta$  5.51-5.49 (m, 1H,  $\text{CH}=\text{C}_\alpha$ ), 4.17 (m, 1H,  $\text{CHOH}$ ), 1.95-1.91 (m, 2H,  $\text{CH}_2$ ), 1.80-1.75 (m, 2H,  $\text{CH}_2$ ), 1.68 (d,  $J = 0.8$  Hz, 3H,  $\text{CH}_3$ ), 1.60-1.56 (m, 2H,  $\text{CH}_2$ ); the data are consistent with literature.<sup>3</sup>

### (E)-3-(p-Tolyl)prop-2-en-1-ol (2c)

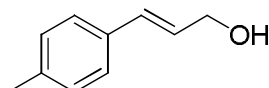

Prepared according to general procedure **3.1** to afford allylic alcohol **2c**.  $^1\text{H NMR}$  (300 MHz,  $\text{CDCl}_3$ ):  $\delta$  7.29 (d,  $J = 8.0$  Hz, 2H, 2 x Ar-H), 7.13 (d,  $J = 8.0$  Hz, 2H, 2 x Ar-H), 6.59 (d,  $J = 15.9$  Hz, 1H,  $\text{ArCH}=\text{CH}$ ), 6.32 (dt,  $J = 15.9$ , 5.8 Hz, 1H,  $\text{CH}=\text{CHCH}_2$ ), 4.31 (d,  $J = 5.7$  Hz, 2H,  $\text{CH}_2\text{OH}$ ), 2.34 (s, 3H,  $\text{CH}_3$ ); the data are consistent with literature.<sup>4</sup>

### (E)-3-(2-Methoxyphenyl)prop-2-en-1-ol (2d)

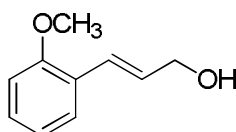

Prepared according to general procedure **3.1** to afford allylic alcohol **2d**.  $^1\text{H NMR}$  (300 MHz,  $\text{CDCl}_3$ ):  $\delta$  7.44 (dd,  $J = 7.6$ , 1.4 Hz, 1H, Ar-H), 7.22 (dd,  $J = 8.3$ , 1.1 Hz, 1H, Ar-H), 6.96-6.86 (m, 3H, overlapping 2 x Ar-H and  $\text{ArCH}=\text{CH}$ ), 6.39 (dt,  $J = 16.0$ , 5.9 Hz, 1H,  $\text{CH}=\text{CHCH}_2$ ), 4.33 (d,  $J = 5.9$  Hz, 2H,  $\text{CH}_2\text{OH}$ ), 3.85 (s, 3H,  $\text{OCH}_3$ ); the data are consistent with literature.<sup>5</sup>

### (E)-3-(4-Methoxyphenyl)prop-2-en-1-ol (2e)

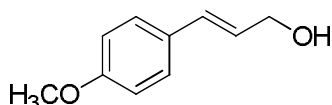

Prepared according to general procedure **3.1** to afford allylic alcohol **2e**.  $^1\text{H NMR}$  (300 MHz,  $\text{CDCl}_3$ )  $\delta$  7.32 (d,  $J = 8.7$  Hz, 2H, 2 x Ar-H), 6.86 (d,  $J = 8.7$  Hz, 2H, 2 x Ar-H), 6.55 (d,  $J = 15.9$  Hz, 1H,  $\text{ArCH}=\text{CH}$ ), 6.23 (dt,  $J = 15.8$ , 5.9 Hz, 1H,  $\text{CH}=\text{CHCH}_2$ ), 4.29 (d,  $J = 5.9$  Hz, 2H,  $\text{CH}_2\text{OH}$ ), 3.81 (s, 3H,  $\text{OCH}_3$ ); the data are consistent with literature.<sup>4</sup>

**(E)-3-(3,4,5-Trimethoxyphenyl)prop-2-en-1-ol (2f)**

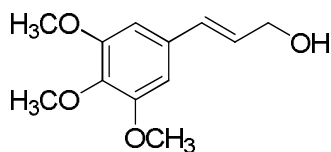

Prepared according to general procedure **3.1** to afford allylic alcohol **2f**.  $^1\text{H}$  NMR (500 MHz,  $\text{CDCl}_3$ ):  $\delta$  6.60 (s, 2H, 2 x Ar-H), 6.53 (d,  $J = 15.8$  Hz, 1H, ArCH=CH), 6.28 (dt,  $J = 15.8, 5.8$  Hz, 1H, CH=CHCH<sub>2</sub>), 4.31 (dd,  $J = 5.7, 1.1$  Hz, 2H, CH<sub>2</sub>OH), 3.86 (s, 6H, 2 x OCH<sub>3</sub>), 3.84 (s, 3H, OCH<sub>3</sub>); the data are consistent with literature.<sup>6</sup>

**(E)-3-(4-(Dimethylamino)phenyl)prop-2-en-1-ol (2g)**

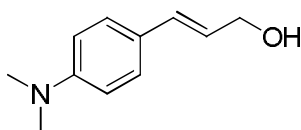

Prepared according to general procedure **3.1** to afford allylic alcohol **2g**.  $^1\text{H}$  NMR (300 MHz,  $\text{CDCl}_3$ )  $\delta$  7.29 (d,  $J = 8.8$  Hz, 2H, 2 x Ar-H), 6.68 (d,  $J = 8.8$  Hz, 2H, 2 x Ar-H), 6.52 (d,  $J = 15.8$  Hz, 1H, ArCH=CH), 6.18 (dt,  $J = 15.8, 6.2$  Hz, 1H, CH=CHCH<sub>2</sub>), 4.28 (m, 2H, CH<sub>2</sub>OH), 2.96 (s, 6H, N(CH<sub>3</sub>)<sub>2</sub>); the data are consistent with literature.<sup>7</sup>

**(E)-3-(4-Fluorophenyl)prop-2-en-1-ol (2h)**

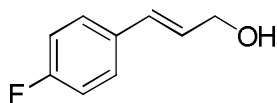

Prepared according to general procedure **3.2** to afford allylic alcohol **2h**.  $^1\text{H}$  NMR (300 MHz,  $\text{CDCl}_3$ )  $\delta$  7.38-7.33 (m, 2H, 2 x Ar-H), 7.04-6.98 (m, 2H, 2 x Ar-H), 6.59 (d,  $J = 15.9$  Hz, 1H, ArCH=CH), 6.28 (dt,  $J = 15.8, 5.6$  Hz, 1H, CH=CHCH<sub>2</sub>), 4.33-4.31 (m, 2H, CH<sub>2</sub>OH); the data are consistent with literature.<sup>4</sup>

**(E)-3-(4-Chlorophenyl)prop-2-en-1-ol (2i)**

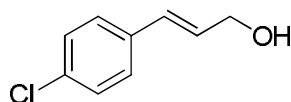

Prepared according to general procedure **3.1** to afford allylic alcohol **2i**.  $^1\text{H}$  NMR (300 MHz,  $\text{CDCl}_3$ ):  $\delta$  7.33-7.27 (m, 4H, 4 x Ar-H), 6.58 (dt,  $J = 15.9, 1.5$  Hz, 1H, ArCH=CH), 6.38-6.29 (m, 1H, CH=CHCH<sub>2</sub>), 4.33 (d,  $J = 5.4$  Hz, 2H, CH<sub>2</sub>OH); the data are consistent with literature.<sup>8</sup>

**(E)-3-(4-Bromophenyl)prop-2-en-1-ol (2j)**

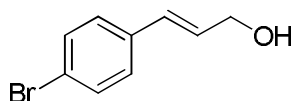

Prepared according to general procedure **3.2** to afford allylic alcohol **2j**.  $^1\text{H}$  NMR (300 MHz,  $\text{CDCl}_3$ )  $\delta$  7.44 (d,  $J = 7.8$  Hz, 2H, 2 x Ar-H), 7.24-7.23 (m, 2H, 2 x Ar-H), 6.57 (d,  $J = 16.7$  Hz, 1H, ArCH=CH), 6.38-6.31 (m, 1H, CH=CHCH<sub>2</sub>), 4.34-4.32 (m, 2H, CH<sub>2</sub>OH); the data are consistent with literature.<sup>5</sup>

**(E)-1-Phenylhept-1-en-3-ol (2l)**

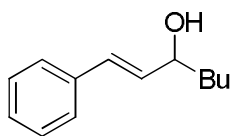

Prepared according to general procedure **3.3** to afford allylic alcohol **2l**.  $^1\text{H}$  NMR (500 MHz,  $\text{CDCl}_3$ ):  $\delta$  7.39 (d,  $J = 7.3$  Hz, 2H, 2 x Ar-H), 7.32 (t,  $J = 7.6$  Hz, 2H, 2 x Ar-H), 7.24 (t,  $J = 7.3$  Hz, 1H, Ar-H), 6.57 (d,  $J = 15.9$  Hz, 1H, ArCH=CH), 6.23 (dd,  $J = 15.9, 6.8$  Hz, 1H, CH=CHCH), 4.28 (m, 1H, CHOH), 1.77 (bs, 1H, OH), 1.72-1.58 (m, 2H,  $\text{CH}_2$ ), 1.45-1.34 (m, 4H, 2 x  $\text{CH}_2$ ), 0.93 (t,  $J = 7.0$  Hz, 3H,  $\text{CH}_3$ ); the data are consistent with literature.<sup>9</sup>

**(E)-4-Phenylbut-3-en-2-ol (2m)**

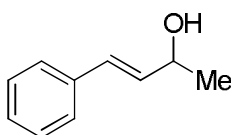

Prepared according to general procedure **3.3** to afford allylic alcohol **2m**.  $^1\text{H}$  NMR (300 MHz,  $\text{CDCl}_3$ )  $\delta$  7.40-7.24 (m, 5H, 5 x Ar-H), 6.56 (d,  $J = 16.0$  Hz, 1H, Ar-CH=CH), 6.30-6.22 (m, 1H, Ar-CH=CH), 4.53-4.44 (m, 1H, CHOH), 1.37 (d,  $J = 6.4$  Hz, 3H,  $\text{CH}_3$ ); the data are consistent with literature.<sup>10</sup>

**(E)-2-Methyl-1-phenylhept-1-en-3-ol (2n)**

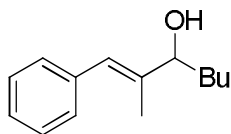

Prepared according to general procedure **3.3** to afford allylic alcohol **2n**.  $^1\text{H}$  NMR (500 MHz,  $\text{CDCl}_3$ )  $\delta$  7.35-7.32 (m, 2H, 2 x Ar-H), 7.29-7.27 (m, 2H, 2 x Ar-H), 7.23-7.19 (m, 1H, Ar-H), 6.48 (s, 1H, CH=Cq), 4.17 (t,  $J = 6.7$  Hz, 1H, CHOH), 1.87 (d,  $J = 1.3$  Hz, 3H,  $\text{CH}_3\text{C}_q$ ), 1.65-1.62 (m, 2H,  $\text{CHCH}_2$ ), 1.43-1.33 (m, 4H, 2 x  $\text{CH}_2$ ), 0.92 (t,  $J = 7.1$  Hz, 3H,  $\text{CH}_2\text{CH}_3$ ); the data are consistent with literature.<sup>11</sup>

**1-Butylcyclohex-2-enol (2o)**

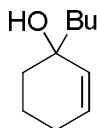

Prepared according to general procedure **3.3** to afford allylic alcohol **2o**.  $^1\text{H}$  NMR (500 MHz,  $\text{CDCl}_3$ ):  $\delta$  5.80-5.77 (m, 1H,  $\text{C}_q\text{CH}=\text{CH}$ ), 5.61 (d,  $J = 10.0$  Hz, 1H,  $\text{C}_q\text{CH}=\text{CH}$ ), 2.05-2.01 (m, 1H,  $\text{CH}_a\text{H}_b$ ), 1.95-1.89 (m, 1H,  $\text{CH}_a\text{H}_b$ ), 1.73-1.45 (m, 6H, 3 x  $\text{CH}_2$ ), 1.32-1.31 (m, 4H, 2 x  $\text{CH}_2$ ), 0.92-0.89 (m, 3H,  $\text{CH}_3$ ); the data are consistent with literature.<sup>12</sup>

**(E)-Dec-2-en-1-ol (2r)**

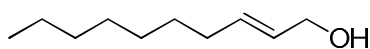



Prepared according to general procedure **3.1** to afford allylic alcohol **2r**.  $^1\text{H}$  NMR (500 MHz,  $\text{CDCl}_3$ )  $\delta$  5.72-5.60 (m, 2H,  $\text{CH}=\text{CH}$ ), 4.08 (d,  $J = 4.9$  Hz, 2H,  $\text{CH}_2\text{OH}$ ), 2.06-2.01 (m, 2H,  $\text{CH}_2\text{CH}=\text{CH}$ ), 1.38-1.31 (m, 10H, 5 x  $\text{CH}_2$ ), 0.88 (t,  $J = 6.4$  Hz, 3H,  $\text{CH}_3$ ); the data are consistent with literature.<sup>13</sup>

**(E)-Dodec-2-en-1-ol (2t)**

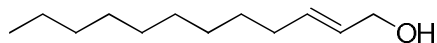

Prepared according to general procedure **3.1** to afford allylic alcohol **2t**.  $^1\text{H}$  NMR (300 MHz,  $\text{CDCl}_3$ )  $\delta$  5.73-5.58 (m, 2H,  $\text{CH}=\text{CH}$ ), 4.08 (d,  $J = 4.9$  Hz, 2H,  $\text{CH}_2\text{OH}$ ), 2.07-2.00 (m, 2H,  $\text{CH}_2\text{CH}=\text{CH}$ ), 1.39-1.19 (m, 14H, 7 x  $\text{CH}_2$ ), 0.88 (t,  $J = 6.6$  Hz, 3H,  $\text{CH}_3$ ); the data are consistent with literature.<sup>14</sup>

**(E)-Hex-2-en-1-ol (2u)**

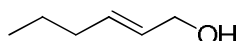

Prepared according to general procedure **3.1** to afford allylic alcohol **2u**.  $^1\text{H}$  NMR (300 MHz,  $\text{CDCl}_3$ )  $\delta$  5.74-5.58 (m, 2H,  $\text{CH}=\text{CH}$ ), 4.08 (d,  $J = 4.4$  Hz, 2H,  $\text{CH}_2\text{OH}$ ), 2.05-1.98 (m, 2H,  $\text{CH}_2\text{CH}=\text{CH}$ ), 1.41-1.36 (m, 2H,  $\text{CH}_2\text{CH}_3$ ), 0.90 (t,  $J = 7.3$  Hz, 3H,  $\text{CH}_3$ ); the data are consistent with literature.<sup>15</sup>

**(E)-3-(3-(trifluoromethyl)phenyl)prop-2-en-1-ol (2ad)**

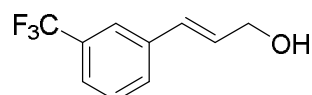

Prepared according to general procedure **3.2** to afford allylic alcohol **2ad**.  $^1\text{H}$  NMR (500 MHz,  $\text{CDCl}_3$ )  $\delta$  7.62 (s, 1H, Ar-H), 7.55 (d,  $J = 7.7$  Hz, 1H, Ar-H), 7.49 (d,  $J = 7.7$  Hz, 1H, Ar-H), 7.43 (t,  $J = 7.7$  Hz, 1H, Ar-H), 6.66 (d,  $^3J_{\text{trans}} = 16.0$  Hz, 1H, ArCH=CH), 6.44 (dt,  $J = 16.0, 5.4$  Hz, 1H,  $\text{CH}=\text{CHCH}_2$ ), 4.36 (broad signal, 2H,  $\text{CH}_2\text{OH}$ );  $^{19}\text{F}$  NMR (470 MHz,  $\text{CDCl}_3$ )  $\delta$  62.84 (s, 3F,  $\text{CF}_3$ ); the data are consistent with literature.<sup>16</sup>

Compounds **2b**, **2k**, **2p**, **2q**, **2s**, **2v**, **2w**, **2x**, **2y**, **2z**, **2aa** are commercially available.

## 5. Assignment of stereochemistry for fluorocyclopropanes 4.

The stereochemistry of fluorocyclopropanes **4** was ascertained according to previous stereochemical assignments reported by Charette.<sup>17</sup> The relative configuration of cyclopropanes was established considering the  $^1\text{H}$  and  $^{19}\text{F}$  coupling constants values. Typical  $^3J_{\text{H-H}}$  and  $^3J_{\text{H-F}}$  values for these systems are reported in the following scheme:

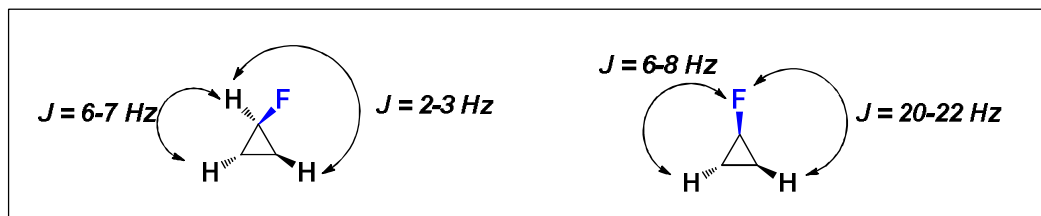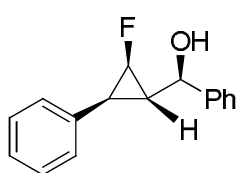

The stereochemical assignment is made assuming that the *trans* stereochemistry of the starting alkene is maintained in the cyclopropanation reaction, according to the proposed mechanism. For example, in cyclopropane **4d** the  $^1\text{H}$  NMR spectrum showed  $\text{H}_a$  as a quartet, a *trans* relationship with the fluorine ( $^3J_{\text{H-F}} = 6-8$  Hz), and a *cis* relationship with  $\text{H}_b$  ( $^3J_{\text{H-H}} = 6-8$  Hz). The proposed stereochemistry has also been confirmed by 2D NOESY experiments (See below). Similar considerations apply to all fluorocyclopropanes.

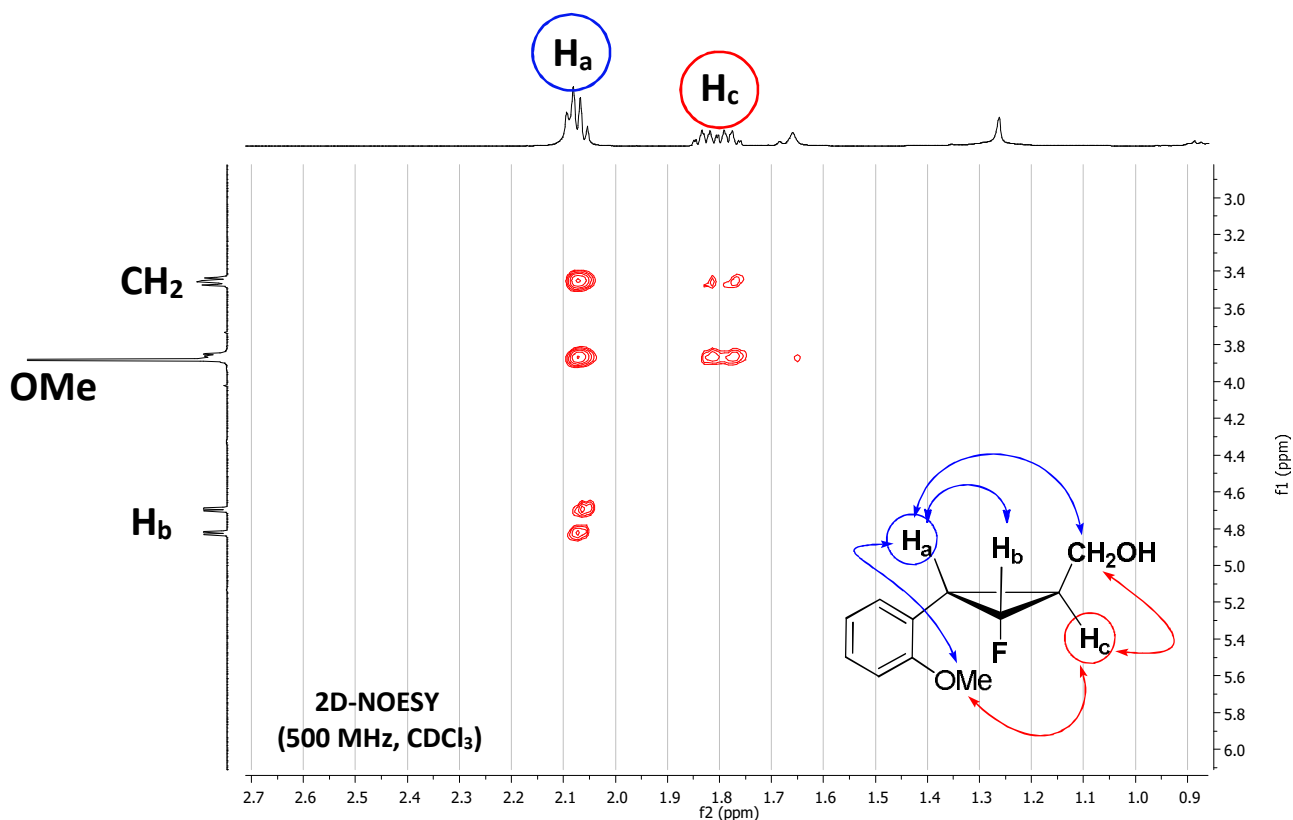

## 6. General procedure for the preparation of fluorocyclopropanes

To a stirred solution of allylic alcohols (2 mmol, 2 equiv) in dry THF (33 mL) cooled at  $-50^{\circ}\text{C}$ , fluoroiodomethane (159.92 mg, 0.67 mL, 1 mmol, 1 equiv) was added. Then, a commercial solution of LDA (2M, in THF/hexane/ethylbenzene, 1.5 mL, 3 mmol, 3 equiv) was added dropwise. After stirring for 15 minutes at  $-50^{\circ}\text{C}$  and for 10 minutes at room temperature, the reaction was quenched with water (1 mL). The mixture was poured into water (10 mL) and extracted with EtOAc (3 x 10 mL). The combined organic layers were dried over  $\text{Na}_2\text{SO}_4$ , and concentrated under vacuum. Chromatography purification of the crude afforded the desired fluorocyclopropanes.

## 7. NMR data for fluorocyclopropanes

### (1R\*,2R\*,6R\*,7R\*)-7-Fluoro-6-methylbicyclo[4.1.0]heptan-2-ol (4a)

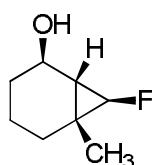

Prepared according to general procedure **6** to afford fluorocyclopropane **4a** as pale yellow oil (70 mg, 56%, *dr* = 80:20, *selected data for major*). Compound **4a** mixture with allylic alcohol **2a**.  $R_f$  = 0.3 (20% AcOEt in hexane); IR (film)/ $\text{cm}^{-1}$  3392, 2924, 2853, 1640, 1462, 1377, 1054;  $^1\text{H}$  NMR (500 MHz,  $\text{CDCl}_3$ )  $\delta$  4.51 (dd,  $^2J_{(\text{H-F})}$  = 65.2 Hz,  $^3J_{\text{trans}(\text{H-H})}$  = 2.2 Hz, 1H, CHF), 4.17-4.16 (m, 1H, CHOH), 1.75-1.71 (m, 1H,  $\text{CH}_a\text{H}_b$ ), 1.54-1.51 (m, 2H,  $\text{CH}_2$ ), 1.37-1.30 (m, 1H, CHCHF), 1.27-1.24 (m, 1H,  $\text{CH}_a\text{H}_b$ ), 1.21 (d,  $J$  = 1.7 Hz, 3H,  $\text{C}_q\text{CH}_3$ ), 1.17-1.11 (m, 1H,  $\text{CH}_a\text{H}_b$ ), 0.97-0.93 (m, 1H,  $\text{CH}_a\text{H}_b$ );  $^{13}\text{C}$  NMR (126 MHz,  $\text{CDCl}_3$ , *selected data for major*)  $\delta$  78.6 (d,  $^1J_{(\text{C-F})}$  = 225.8 Hz, CHF), 66.0 (CHOH), 31.8 ( $\text{CH}_2$ ), 31.1 (d,  $^2J_{(\text{C-F})}$  = 9.1 Hz, CHCHF), 30.7 ( $\text{CH}_2$ ), 23.9 (d,  $^2J_{(\text{C-F})}$  = 9.5 Hz,  $\text{C}_q\text{CH}_3$ ), 19.5 (d,  $^3J_{(\text{C-F})}$  = 8.6 Hz,  $\text{C}_q\text{CH}_3$ ), 19.1 ( $\text{CH}_2$ );  $^{19}\text{F}$  NMR (470 MHz,  $\text{CDCl}_3$ , *selected data for major*)  $\delta$  -218.15 (dd,  $^2J_{(\text{H-F})}$  = 65.2 Hz,  $^3J_{\text{cis}(\text{H-F})}$  = 23.4 Hz, CHF); HRMS (ESI-TOF)  $m/z$  Calcd for  $\text{C}_8\text{H}_{13}\text{FNaO}$  [ $\text{M}+\text{Na}$ ] $^+$  167.0843; Found: 167.0842.

### ((1R\*,2S\*,3R\*)-2-Fluoro-3-phenylcyclopropyl)methanol (4b)

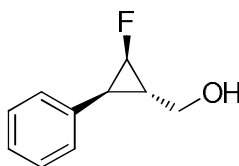

Prepared according to general procedure **6** to afford fluorocyclopropane **4b** as colorless oil (115 mg, 80%, *dr* = 90:10).  $R_f$  = 0.3 (30% EtOAc in hexane). IR (film)/ $\text{cm}^{-1}$  3367, 2922, 1603, 1498, 1458, 1260, 1095, 1029, 913, 799, 743;  $^1\text{H}$  NMR (500 MHz,  $\text{CDCl}_3$ ):  $\delta$  7.32-7.30 (m, 2H, 2 x Ar-H), 7.25-7.22 (m, 3H, 3 x Ar-H), 4.69 (ddd,  $^2J_{(\text{H-F})}$  = 64.9 Hz,  $^3J_{\text{cis}(\text{H-H})}$  = 6.7 Hz,  $^3J_{\text{trans}(\text{H-H})}$  = 2.5 Hz, 1H, CHF), 3.71-3.65 (m, 2H,  $\text{CH}_2\text{OH}$ ), 2.08 (q,  $^3J_{\text{trans}(\text{H-H})}$  =  $^3J_{(\text{H-F})}$  = 6.7 Hz, 1H, ArCHCHF), 1.98-1.89 (m, 1H, CH $\text{CH}_2\text{OH}$ );  $^{13}\text{C}$  NMR (126 MHz,  $\text{CDCl}_3$ ):  $\delta$  135.3 (d,  $^3J_{(\text{C-F})}$  = 3.0 Hz, Ar- $\text{C}_q$ ), 128.6 (d,  $^4J_{(\text{C-F})}$  = 1.3 Hz, 2 x Ar-C), 128.4 (2 x Ar-C), 126.7 (Ar-C), 75.5 (d,  $^1J_{(\text{C-F})}$  = 226.5 Hz, CHF), 62.4 (d,  $^3J_{(\text{C-F})}$  = 0.8 Hz,  $\text{CH}_2\text{OH}$ ), 27.2 (d,  $^2J_{(\text{C-F})}$  = 8.8 Hz, CH $\text{CH}_2$ ), 26.5 (d,  $^2J_{(\text{C-F})}$  = 11.0 Hz, ArCHCHF);  $^{19}\text{F}$  NMR (470 MHz,  $\text{CDCl}_3$ ):  $\delta$  -220.75 (ddd,  $^2J_{(\text{H-F})}$  = 64.9 Hz,  $^3J_{\text{cis}(\text{H-F})}$  = 20.7 Hz,  $^3J_{\text{trans}(\text{H-F})}$  = 5.8 Hz, CHF); HRMS (ESI-TOF)  $m/z$  Calcd for  $\text{C}_{10}\text{H}_{10}\text{FO}$  [ $\text{M}-\text{H}$ ] $^-$  165.0721; Found: 165.0721.

**((1R\*,2S\*,3S\*)-2-Fluoro-3-(p-tolyl)cyclopropyl)methanol (4c)**

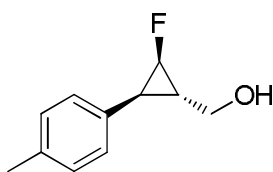

Prepared according to general procedure **6** to afford fluorocyclopropane **4c** as orange oil (121 mg, 78%, *dr* = 90:10). *R<sub>f</sub>* = (30% EtOAc in hexane). IR (film)/cm<sup>-1</sup> 3367, 2922, 2852, 1518, 1455, 1377, 1215, 1176, 1096, 1036, 988, 817, 737; <sup>1</sup>H NMR (500 MHz, CDCl<sub>3</sub>): δ 7.17-7.12 (m, 4H, 4 x Ar-H), 4.67 (ddd, <sup>2</sup>*J*<sub>(H-F)</sub> = 65.0 Hz, <sup>3</sup>*J*<sub>cis (H-H)</sub> = 6.7 Hz, <sup>3</sup>*J*<sub>trans (H-H)</sub> = 2.4 Hz, 1H, CHF), 3.69-3.64 (m, 2H, CH<sub>2</sub>OH), 2.34 (s, 3H, Ar-CH<sub>3</sub>), 2.05 (q, <sup>3</sup>*J*<sub>(H-F)</sub> = <sup>3</sup>*J*<sub>(H-H)</sub> = 6.6 Hz, 1H, ArCHCHF), 1.95-1.87 (m, 1H, CHCH<sub>2</sub>OH), 1.77 (bs, 1H, OH); <sup>13</sup>C NMR (126 MHz, CDCl<sub>3</sub>): δ 136.3 (Ar-C<sub>q</sub>-CH<sub>3</sub>), 132.1 (d, <sup>3</sup>*J*<sub>(C-F)</sub> = 3.2 Hz, Ar-C<sub>q</sub>CH), 129.1 (2 x Ar-C), 128.5 (d, <sup>4</sup>*J*<sub>(C-F)</sub> = 1.0 Hz, 2 x Ar-C), 75.5 (d, <sup>1</sup>*J*<sub>(C-F)</sub> = 226.0 Hz, CHF), 62.4 (d, <sup>3</sup>*J*<sub>(C-F)</sub> = 0.6 Hz, CH<sub>2</sub>OH), 26.9 (d, <sup>2</sup>*J*<sub>(C-F)</sub> = 8.8 Hz, CHCH<sub>2</sub>OH), 26.2 (d, <sup>2</sup>*J*<sub>(C-F)</sub> = 11.0 Hz, Ar-CHCHF), 21.1 (Ar-CH<sub>3</sub>); <sup>19</sup>F NMR (470 MHz, CDCl<sub>3</sub>): δ -220.82 (ddd, <sup>2</sup>*J*<sub>(H-F)</sub> = 65.0 Hz, <sup>3</sup>*J*<sub>cis (H-F)</sub> = 20.7 Hz, <sup>3</sup>*J*<sub>trans (H-F)</sub> = 6.1 Hz, CHF); HRMS (ESI-TOF) *m/z* Calcd for C<sub>11</sub>H<sub>12</sub>FO [M-H]<sup>-</sup> 179.0878; Found: 179.0872.

**((1S\*,2R\*,3S\*)-2-Fluoro-3-(2-methoxyphenyl)cyclopropyl)methanol (4d)**

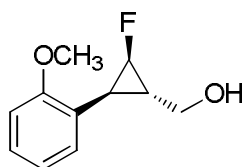

Prepared according to general procedure **6** to afford fluorocyclopropane **4d** as yellow oil (82 mg, 48%, *dr* = 90:10). *R<sub>f</sub>* = 0.4 (20% EtOAc in hexane). IR (film)/cm<sup>-1</sup> 3368, 2921, 2850, 1601, 1585, 1495, 1463, 1435, 1245, 1110, 1027, 751; <sup>1</sup>H NMR (500 MHz, CDCl<sub>3</sub>): δ 7.25-7.22 (m, 2H, 2 x Ar-H), 6.94-6.89 (m, 2H, 2 x Ar-H), 4.76 (ddd, <sup>2</sup>*J*<sub>(H-F)</sub> = 64.2 Hz, <sup>3</sup>*J*<sub>cis (H-H)</sub> = 6.6 Hz, <sup>3</sup>*J*<sub>trans (H-H)</sub> = 2.2 Hz, 1H, CHF), 3.88 (s, 3H, Ar-OCH<sub>3</sub>), 3.88-3.85 (m, 1H, CH<sub>a</sub>H<sub>b</sub>), 3.47-3.44 (m, 1H, CH<sub>a</sub>H<sub>b</sub>), 2.09-2.05 (m, 2H, overlapping bs OH and Ar-CHCHF), 1.85-1.76 (m, 1H, CHCH<sub>2</sub>); <sup>13</sup>C NMR (126 MHz, CDCl<sub>3</sub>): δ 158.7 (Ar-C<sub>q</sub>), 129.2 (d, <sup>4</sup>*J*<sub>(C-F)</sub> = 2.5 Hz, Ar-C), 128.0 (Ar-C), 123.8 (d, <sup>3</sup>*J*<sub>(C-F)</sub> = 2.5 Hz, Ar-C<sub>q</sub>), 120.6 (Ar-C), 110.4 (Ar-C), 75.9 (d, <sup>1</sup>*J*<sub>(C-F)</sub> = 226.2 Hz, CHF), 63.0 (d, <sup>3</sup>*J*<sub>(C-F)</sub> = 0.9 Hz, CH<sub>2</sub>OH), 55.6 (OCH<sub>3</sub>), 27.5 (d, <sup>2</sup>*J*<sub>(C-F)</sub> = 9.3 Hz, CHCH<sub>2</sub>), 21.4 (d, <sup>2</sup>*J*<sub>(C-F)</sub> = 10.7 Hz, Ar-CHCHF); <sup>19</sup>F NMR (470 MHz, CDCl<sub>3</sub>): δ -219.20 (ddd, <sup>2</sup>*J*<sub>(H-F)</sub> = 64.2 Hz, <sup>3</sup>*J*<sub>cis (H-F)</sub> = 21.2 Hz, <sup>3</sup>*J*<sub>trans (H-F)</sub> = 5.9 Hz, CHF); HRMS (ESI-TOF) *m/z* Calcd for C<sub>11</sub>H<sub>12</sub>FO<sub>2</sub> [M-H]<sup>-</sup> 195.0827; Found: 195.0820.

**((1R\*,2S\*,3R\*)-2-Fluoro-3-(4-methoxyphenyl)cyclopropyl)methanol (4e)**

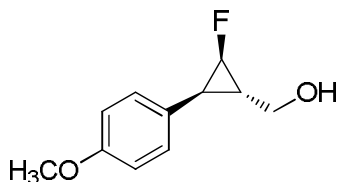

Prepared according to general procedure **6** to afford fluorocyclopropane **4e** as yellow oil (121 mg, 64%, *dr* > 95:5). *R<sub>f</sub>* = 0.3 (60% diethyl ether in hexane); IR (film)/cm<sup>-1</sup> 3369, 2917, 1611, 1514, 1462, 1245, 1179, 1030, 830; <sup>1</sup>H NMR (300 MHz, CDCl<sub>3</sub>) δ 7.18 (d, *J* = 8.2 Hz, 2H, 2 x Ar-H), 6.86 (d, *J* = 8.3 Hz, 2H, 2 x Ar-H), 4.66 (dd, <sup>2</sup>*J*<sub>(H-F)</sub> = 65.0 Hz, <sup>3</sup>*J*<sub>cis (H-F)</sub> = 6.5 Hz, 1H, CHF), 3.79 (s, 3H, OCH<sub>3</sub>), 3.68 (d, *J* = 4.8 Hz, 2H, CH<sub>2</sub>OH), 2.04 (q, <sup>3</sup>*J*<sub>(H-F)</sub> = <sup>3</sup>*J*<sub>(H-H)</sub> = 6.5 Hz, 1H, Ar-CHCHF), 1.91-1.82 (m, 1H, CHCH<sub>2</sub>OH); <sup>13</sup>C NMR (75 MHz, CDCl<sub>3</sub>) δ 158.5 (OCH<sub>3</sub>-Ar-

C<sub>q</sub>), 129.7 (2 x Ar-C), 127.3 (d, <sup>3</sup>J<sub>(C-F)</sub> = 3.3 Hz, Ar-C<sub>q</sub>), 113.9 (2 x Ar-C), 75.4 (d, <sup>1</sup>J<sub>(C-F)</sub> = 225.4 Hz, CHF), 62.5 (CH<sub>2</sub>OH), 55.4 (OCH<sub>3</sub>), 27.0 (d, <sup>2</sup>J<sub>(C-F)</sub> = 8.8 Hz, CHCH<sub>2</sub>OH), 25.8 (d, <sup>2</sup>J<sub>(C-F)</sub> = 11.1 Hz, Ar-CHCHF); <sup>19</sup>F NMR (282 MHz, CDCl<sub>3</sub>) δ -220.93 (ddd, <sup>2</sup>J<sub>(H-F)</sub> = 64.9 Hz, <sup>3</sup>J<sub>cis (H-F)}</sub> = 20.7 Hz, <sup>3</sup>J<sub>trans (H-F)}</sub> = 5.9 Hz, CHF); HRMS (ESI-TOF) *m/z* Calcd for C<sub>11</sub>H<sub>12</sub>FO<sub>2</sub> [M-H]<sup>-</sup> 195.0827; Found: 195.0820.

**((1*R*\*,2*S*\*,3*R*\*)-2-Fluoro-3-(3,4,5-trimethoxyphenyl)cyclopropyl)methanol (4f)**

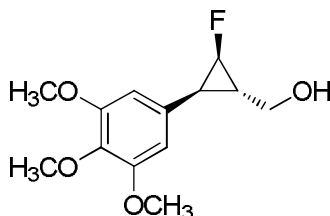

Prepared according to general procedure 6 to afford fluorocyclopropane **4f** as orange oil (112 mg, 50%, *dr* > 95:5). *R<sub>f</sub>* = 0.2 (50% EtOAc in hexane); IR (film)/cm<sup>-1</sup> 3392, 2923, 2852, 1588, 1510, 1463, 1413, 1235, 1125, 1005; <sup>1</sup>H NMR (500 MHz, CDCl<sub>3</sub>): δ 6.48 (s, 2H, 2 x Ar-H), 4.69 (ddd, <sup>2</sup>J<sub>(H-F)</sub> = 64.9 Hz, <sup>3</sup>J<sub>cis (H-H)}</sub> = 6.6 Hz, <sup>3</sup>J<sub>trans (H-H)}</sub> = 2.5 Hz, 1H, CHF), 3.85 (s, 6H, 2 x OCH<sub>3</sub>), 3.83 (s, 3H, OCH<sub>3</sub>), 3.72-3.69 (m, 2H, CH<sub>2</sub>OH), 2.07-2.03 (m, 1H, Ar-CHCHF), 1.90 (m, 1H, CHCH<sub>2</sub>OH); <sup>13</sup>C NMR (126 MHz, CDCl<sub>3</sub>): δ 153.2 (2 x Ar-C<sub>q</sub>), 137.0 (Ar-C<sub>q</sub>), 131.0 (d, <sup>3</sup>J<sub>(C-F)</sub> = 3.2 Hz, Ar-C<sub>q</sub>), 105.8 (d, <sup>4</sup>J<sub>(C-F)</sub> = 1.3 Hz, 2 x Ar-C), 75.5 (d, <sup>1</sup>J<sub>(C-F)</sub> = 226.5 Hz, CHF), 62.3 (d, <sup>3</sup>J<sub>(C-F)</sub> = 0.8 Hz, CH<sub>2</sub>OH), 61.0 (OCH<sub>3</sub>), 56.2 (2 x OCH<sub>3</sub>), 27.4 (d, <sup>2</sup>J<sub>(C-F)</sub> = 8.8 Hz, CHCH<sub>2</sub>OH), 26.7 (d, <sup>2</sup>J<sub>(C-F)</sub> = 10.9 Hz, Ar-CHCHF); <sup>19</sup>F NMR (470 MHz, CDCl<sub>3</sub>): δ -220.56 (ddd, <sup>2</sup>J<sub>(H-F)</sub> = 64.9 Hz, <sup>3</sup>J<sub>cis (H-F)}</sub> = 20.9 Hz, <sup>3</sup>J<sub>trans (H-F)}</sub> = 5.9 Hz, CHF); HRMS (ESI-TOF) *m/z* Calcd for C<sub>13</sub>H<sub>16</sub>FO<sub>4</sub> [M-H]<sup>-</sup> 255.1038; Found: 255.1032

**((1*R*\*,2*R*\*,3*S*\*)-2-(4-(Dimethylamino)phenyl)-3-fluorocyclopropyl)methanol (4g)**

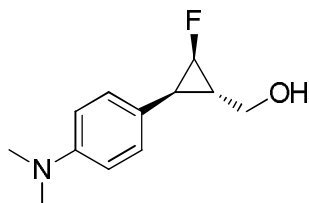

Prepared according to general procedure 6 to afford fluorocyclopropane **4g** as orange oil (108 mg, 60%, *dr* > 95:5). *R<sub>f</sub>* = 0.4 (30% AcOEt in hexane); IR (film)/cm<sup>-1</sup> 3338, 2875, 1614, 1524, 1444, 1349, 1224, 1130, 1094, 1036, 987, 948, 818; <sup>1</sup>H NMR (500 MHz, CDCl<sub>3</sub>) δ 7.14 (d, *J* = 8.6 Hz, 2H, 2 x Ar-H), 6.71 (d, *J* = 8.7 Hz, 2H, 2 x Ar-H), 4.64 (ddd, <sup>2</sup>J<sub>(H-F)</sub> = 65.0 Hz, <sup>3</sup>J<sub>cis (H-H)}</sub> = 6.6 Hz, <sup>3</sup>J<sub>trans (H-H)}</sub> = 2.3 Hz, 1H, CHF), 3.71-3.63 (m, 2H, CH<sub>2</sub>OH), 2.92 (s, 6H, N(CH<sub>3</sub>)<sub>2</sub>), 2.01 (q, *J* = 6.6 Hz, 1H, Ar-CHCHF), 1.90-1.83 (m, 1H, CHCH<sub>2</sub>OH); <sup>13</sup>C NMR (126 MHz, CDCl<sub>3</sub>) δ 149.6 (Ar-C<sub>q</sub>), 129.4 (d, <sup>4</sup>J<sub>(C-F)</sub> = 1.0 Hz, 2 x Ar-C), 122.9 (Ar-C<sub>q</sub>), 112.9 (2 x Ar-C), 75.5 (d, <sup>1</sup>J<sub>(C-F)</sub> = 225.1 Hz, CHF), 62.7 (d, <sup>3</sup>J<sub>(C-F)</sub> = 0.7 Hz, CH<sub>2</sub>OH), 40.9 (N(CH<sub>3</sub>)<sub>2</sub>), 26.8 (d, <sup>2</sup>J<sub>(C-F)</sub> = 8.9 Hz, CHCH<sub>2</sub>OH), 25.8 (d, <sup>2</sup>J<sub>(C-F)</sub> = 11.0 Hz, Ar-CHCHF); <sup>19</sup>F NMR (282 MHz, CDCl<sub>3</sub>) δ -220.88 (ddd, <sup>2</sup>J<sub>(H-F)</sub> = 66.2 Hz, <sup>3</sup>J<sub>cis (H-F)}</sub> = 21.8 Hz, <sup>3</sup>J<sub>trans (H-F)}</sub> = 6.6 Hz, CHF); HRMS (ESI-TOF) *m/z* Calcd for C<sub>12</sub>H<sub>15</sub>FNO [M-H]<sup>-</sup> 208.1143; Found: 208.1160.

**((1*R*\*,2*S*\*,3*R*\*)-2-Fluoro-3-(4-fluorophenyl)cyclopropyl)methanol (4h)**

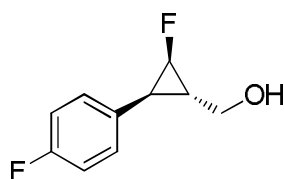

Prepared according to general procedure **6** to afford fluorocyclopropane **4h** as yellow oil (86 mg, 54%, *dr* > 95:5).  $R_f$  = 0.4 (60% diethyl ether in hexane); IR (film)/ $\text{cm}^{-1}$  3368, 2918, 1606, 1513, 1226, 1160, 1037, 834;  $^1\text{H}$  NMR (500 MHz,  $\text{CDCl}_3$ )  $\delta$  7.23-7.19 (m, 2H, 2 x Ar-H), 7.01-6.98 (m, 2H, 2 x Ar-H), 4.68 (ddd,  $^2J_{(\text{H-F})} = 64.8$  Hz,  $^3J_{\text{cis}(\text{H-H})} = 6.6$  Hz,  $^3J_{\text{trans}(\text{H-H})} = 2.4$  Hz, 1H, CHF), 3.69 (dd,  $J = 6.5, 2.2$  Hz, 2H,  $\text{CH}_2\text{OH}$ ), 2.06 (q,  $^3J_{(\text{H-F})} = ^3J_{(\text{H-H})} = 6.6$  Hz, 1H, Ar-CHCHF), 1.91-1.82 (m, 1H,  $\text{CHCH}_2\text{OH}$ );  $^{13}\text{C}$  NMR (75 MHz,  $\text{CDCl}_3$ )  $\delta$  161.8 (d,  $^1J_{(\text{C-F})} = 244.8$  Hz, F-Ar- $\text{C}_q$ ), 130.1 (d,  $^3J_{(\text{C-F})} = 7.9$  Hz, 2 x Ar-C), 115.1 (d,  $^2J_{(\text{C-F})} = 21.4$  Hz, 2 x Ar-C), 75.1 (d,  $^1J_{(\text{C-F})} = 227.1$  Hz, CHF), 62.0 ( $\text{CH}_2\text{OH}$ ), 27.1 (d,  $^2J_{(\text{C-F})} = 8.7$  Hz,  $\text{CHCH}_2\text{OH}$ ), 25.5 (d,  $^2J_{(\text{C-F})} = 11.0$  Hz, Ar-CHCHF);  $^{19}\text{F}$  NMR (282 MHz,  $\text{CDCl}_3$ )  $\delta$  -116.43 – -116.55 (m, Ar-F, 1F), -220.91 (ddd,  $^2J_{(\text{H-F})} = 65.5$  Hz,  $^2J_{\text{cis}(\text{H-F})} = 21.5$  Hz,  $^2J_{\text{trans}(\text{H-F})} = 7.2$  Hz, CHF); HRMS (ESI-TOF)  $m/z$  Calcd for  $\text{C}_{10}\text{H}_9\text{F}_2\text{O}$  [ $\text{M-H}$ ] $^-$  183.0627; Found: 183.0626.

**((1*R*\*,2*R*\*,3*S*\*)-2-(4-Chlorophenyl)-3-fluorocyclopropyl)methanol (4i)**

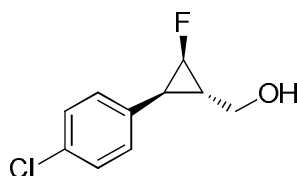

Prepared according to general procedure **6** to afford fluorocyclopropane **4i** as orange oil (70 mg, 40%, *dr* > 95:5).  $R_f$  = 0.4 (50% EtOAc in hexane); IR (film)/ $\text{cm}^{-1}$  3338, 2918, 1494, 1213, 1178, 1090, 1014, 913, 826, 742;  $^1\text{H}$  NMR (500 MHz,  $\text{CDCl}_3$ ):  $\delta$  7.27 (d,  $J = 8.5$  Hz, 2H, 2 x Ar-H), 7.18 (d,  $J = 8.5$  Hz, 2H, 2 x Ar-H), 4.69 (ddd,  $^2J_{(\text{H-F})} = 64.8$  Hz,  $^3J_{\text{cis}(\text{H-H})} = 6.6$  Hz,  $^3J_{\text{trans}(\text{H-H})} = 2.4$  Hz, 1H, CHF), 3.70 (s, 2H,  $\text{CH}_2\text{OH}$ ), 2.08-2.04 (m, 1H, Ar-CHCHF), 1.93-1.84 (m, 1H,  $\text{CHCH}_2\text{OH}$ );  $^{13}\text{C}$  NMR (126 MHz,  $\text{CDCl}_3$ ):  $\delta$  133.9 (d,  $^3J_{(\text{C-F})} = 3.1$  Hz, Ar- $\text{C}_q$ ), 132.5 (Ar- $\text{C}_q$ -Cl), 129.9 (d,  $^4J_{(\text{C-F})} = 1.4$  Hz, 2 x Ar-C), 128.5 (2 x Ar-C), 75.3 (d,  $^1J_{(\text{C-F})} = 226.7$  Hz, CHF), 62.1 ( $\text{CH}_2\text{OH}$ ), 27.4 (d,  $^2J_{(\text{C-F})} = 8.7$  Hz,  $\text{CHCH}_2\text{OH}$ ), 25.8 (d,  $^2J_{(\text{C-F})} = 11.0$  Hz, Ar-CHCHF);  $^{19}\text{F}$  NMR (470 MHz,  $\text{CDCl}_3$ ):  $\delta$  -220.85 (ddd,  $^2J_{(\text{H-F})} = 64.8$  Hz,  $^3J_{\text{cis}(\text{H-F})} = 20.8$  Hz,  $^3J_{\text{trans}(\text{H-F})} = 5.8$  Hz, CHF); HRMS (ESI-TOF)  $m/z$  Calcd for  $\text{C}_{10}\text{H}_9\text{ClFO}$  [ $\text{M-H}$ ] $^-$  199.0331; Found: 199.0327.

**((1*R*\*,2*R*\*,3*S*\*)-2-(4-Bromophenyl)-3-fluorocyclopropyl)methanol (4j)**

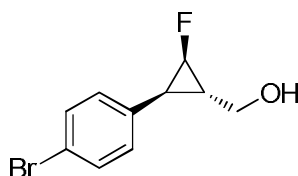

Prepared according to general procedure **6** to afford fluorocyclopropane **4j** as yellow oil (85 mg, 54%, *dr* > 95:5).  $R_f$  = 0.3 (60% diethyl ether in hexane); IR (film)/ $\text{cm}^{-1}$  3352, 2924, 2874, 1493, 1397, 1213, 1177, 1094, 1073, 1036, 1010, 824, 763, 717;  $^1\text{H}$  NMR (300 MHz,  $\text{CDCl}_3$ )  $\delta$  7.42 (d,  $J = 8.5$  Hz, 2H, 2 x Ar-H), 7.12 (d,  $J = 8.3$  Hz, 2H, 2 x Ar-H), 4.69 (ddd,  $^2J_{(\text{H-F})} = 64.8$  Hz,  $^3J_{\text{cis}(\text{H-H})} = 6.6$  Hz,  $^3J_{\text{trans}(\text{H-H})} = 2.5$  Hz, 1H, CHF), 3.70 (d,  $J = 6.2$  Hz, 2H,  $\text{CH}_2\text{OH}$ ), 2.05 (q,  $^3J_{(\text{H-F})} = ^3J_{(\text{H-H})} = 6.6$  Hz, 1H, Ar-CHCHF), 1.96-1.81 (m, 1H,  $\text{CHCH}_2\text{OH}$ );  $^{13}\text{C}$  NMR (75 MHz,  $\text{CDCl}_3$ )  $\delta$  134.6 (d,  $^3J_{(\text{C-F})} = 3.1$  Hz, Ar- $\text{C}_q$ ), 131.4 (2 x Ar-C), 130.4 (2 x Ar-C), 120.5 (Ar- $\text{C}_q$ -Br), 75.2 (d,  $^1J_{(\text{C-F})}$

$f_J = 224.9$  Hz, CHF), 62.1 (CH<sub>2</sub>OH), 27.4 (d,  $^2J_{(C-F)} = 8.7$  Hz, CHCH<sub>2</sub>OH), 25.9 (d,  $^2J_{(C-F)} = 11.0$  Hz, Ar-CHCHF); <sup>19</sup>F NMR (282 MHz, CDCl<sub>3</sub>) δ -220.82 (ddd,  $^2J_{(H-F)} = 64.9$  Hz,  $^3J_{cis (H-F)} = 21.2$  Hz,  $^3J_{trans (H-F)} = 6.7$  Hz, CHF); HRMS (ESI-TOF) *m/z* Calcd for C<sub>10</sub>H<sub>9</sub>BrFO [M-H]<sup>-</sup> 242.9826; Found: 242.9840.

**(R\*)-((1S\*,2R\*,3S\*)-2-Fluoro-3-phenylcyclopropyl)(phenyl)methanol (4k)**

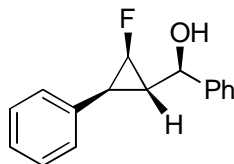

Prepared according to general procedure **6** to afford fluorocyclopropane **4k** as colorless oil (69 mg, 34%, *dr* = 80:20, *selected data for major*). *R<sub>f</sub>* = 0.3 (30% EtOAc in hexane). IR (film)/cm<sup>-1</sup> 3400, 2923, 2852, 1496, 1455, 1178, 1072, 1028, 745, 698; <sup>1</sup>H NMR (500 MHz, CDCl<sub>3</sub>, *selected data for major*) δ 7.45-7.29 (m, 8H, 8 x Ar-H), 7.22-7.19 (m, 2H, 2 x Ar-H), 4.88 (ddd,  $^2J_{(H-F)} = 65.1$  Hz,  $^3J_{cis (H-H)} = 6.8$  Hz,  $^3J_{trans (H-H)} = 2.5$  Hz, 1H, CHF), 4.64-4.62 (m, 1H, CHOH), 2.25 (q, *J* = 6.7 Hz, 1H, Ar-CHCHF), 2.09-1.99 (m, 1H, CHCHOH); <sup>13</sup>C NMR (126 MHz, CDCl<sub>3</sub>, *selected data for major*) δ 142.7 (Ar-C<sub>q</sub>), 135.3 (d,  $^3J_{(C-F)} = 2.9$  Hz, Ar-C<sub>q</sub>), 128.9 (2 x Ar-C), 128.7 (2 x Ar-C), 128.4 (2 x Ar-C), 128.3 (Ar-C), 126.7 (Ar-C), 126.2 (2 x Ar-C), 75.3 (d,  $^1J_{(C-F)} = 227.2$  Hz, CHF), 73.0 (CHOH), 31.7 (d,  $^2J_{(C-F)} = 8.6$  Hz, CHCHOH), 26.2 (d,  $^2J_{(C-F)} = 11.0$  Hz, Ar-CHCHF); <sup>19</sup>F NMR (470 MHz, CDCl<sub>3</sub>, *selected data for major*) δ -221.24 (ddd,  $^2J_{(H-F)} = 65.2$  Hz,  $^3J_{cis (H-F)} = 20.7$  Hz,  $^3J_{trans (H-F)} = 6.1$  Hz, CHF); HRMS (ESI-TOF) *m/z* Calcd for C<sub>16</sub>H<sub>14</sub>FO [M-H]<sup>-</sup> 241.1034; Found: 241.1031.

**(R\*)-1-((1R\*,2S\*,3R\*)-2-Fluoro-3-phenylcyclopropyl)pentan-1-ol (4l)**

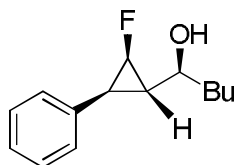

Prepared according to general procedure **6** to afford fluorocyclopropane **4l** as pale yellow oil (67 mg, 35%, *dr* > 95:5). *R<sub>f</sub>* = 0.2 (50% EtOAc in hexane); IR (film)/cm<sup>-1</sup> 3412, 2928, 2857, 2254, 1468, 1266, 1014, 912, 742; <sup>1</sup>H NMR (500 MHz, CDCl<sub>3</sub>): δ 7.33-7.30 (m, 2H, 2 x Ar-H), 7.26-7.22 (m, 3H, 3 x Ar-H), 4.76 (ddd,  $^2J_{(H-F)} = 65.3$  Hz,  $^3J_{cis (H-H)} = 6.7$  Hz,  $^3J_{trans (H-H)} = 2.5$  Hz, 1H, CHF), 3.39-3.37 (m, 1H, CHOH), 2.11-2.05 (m, 1H, Ar-CHCHF), 1.80-1.73 (m, 1H, CHCHOH), 1.67-1.62 (m, 2H, CH<sub>2</sub>CHOH), 1.49-1.32 (m, 4H, CH<sub>2</sub>CH<sub>2</sub>CH<sub>3</sub>), 0.91 (t, *J* = 7.1 Hz, 3H, CH<sub>3</sub>); <sup>13</sup>C NMR (126 MHz, CDCl<sub>3</sub>): δ 135.6 (Ar-C<sub>q</sub>), 128.6 (d,  $^4J_{(C-F)} = 1.3$  Hz, 2 x Ar-C), 128.4 (2 x Ar-C), 126.6 (Ar-C), 75.2 (d,  $^1J_{(C-F)} = 226.3$  Hz, CHF), 71.6 (CHOH), 36.7 (CH<sub>2</sub>CHOH), 31.2 (d,  $^2J_{(C-F)} = 8.1$  Hz, CHCHOH), 27.8 (CH<sub>2</sub>CH<sub>2</sub>CHOH), 26.5 (d,  $^2J_{(C-F)} = 11.1$  Hz, Ar-CHCHF), 22.8 (CH<sub>2</sub>CH<sub>3</sub>), 14.2 (CH<sub>3</sub>); <sup>19</sup>F NMR (470 MHz, CDCl<sub>3</sub>): δ -217.80 (ddd,  $^2J_{(H-F)} = 27.7$  Hz,  $^3J_{cis (H-F)} = 22.3$  Hz,  $^3J_{trans (H-F)} = 6.0$  Hz, CHF *minor*), -221.06 (ddd,  $^2J_{(H-F)} = 65.3$  Hz,  $^3J_{cis (H-F)} = 21.0$  Hz,  $^3J_{trans (H-F)} = 6.0$  Hz, CHF *major*); HRMS (ESI-TOF) *m/z* Calcd for C<sub>14</sub>H<sub>18</sub>FO [M-H]<sup>-</sup> 221.1347; Found: 221.1341.

**(R\*)-1-((1R\*,2S\*,3R\*)-2-Fluoro-3-phenylcyclopropyl)ethanol (4m)**

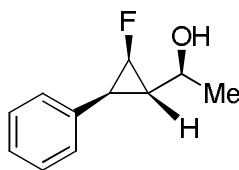

Prepared according to general procedure **6** to afford fluorocyclopropane **4m** as pale yellow oil (59 mg, 38%, *dr* = 80:20, inseparable mixture of diastereoisomers).  $R_f$  = 0.2 (20 % EtOAc in hexane). IR (film)/ $\text{cm}^{-1}$  3367, 2919, 2851, 1603, 1498, 1431, 1073, 945, 745, 697;  $^1\text{H}$  NMR (500 MHz,  $\text{CDCl}_3$ ):  $\delta$  7.33-7.23 (m, 5H, 5 x Ar-H, overlapping major and minor), 4.76 (ddd,  $^2J_{\text{(H-F)}} = 65.2$  Hz,  $^3J_{\text{cis (H-H)}} = 6.7$  Hz,  $^3J_{\text{trans (H-H)}} = 2.5$  Hz, 1H, CHF major), 4.69 (ddd,  $^2J_{\text{(H-F)}} = 65.1$  Hz,  $^3J_{\text{cis (H-H)}} = 6.7$  Hz,  $^3J_{\text{trans (H-H)}} = 2.5$  Hz, 1H, CHF minor), 3.74-3.71 (m, 1H, CHCH<sub>3</sub> minor), 3.61-3.58 (m, 1H, CHCH<sub>3</sub> major), 2.22-2.18 (m, 1H, Ar-CHCHF minor), 2.10-2.06 (m, 1H, Ar-CHCHF major), 1.82-1.74 (m, 1H, CHCHCH<sub>3</sub> overlapping major and minor), 1.37 (d,  $J = 6.2$  Hz, 3H, CH<sub>3</sub> minor) 1.35 (d,  $J = 6.3$  Hz, 3H, CH<sub>3</sub> major);  $^{13}\text{C}$  NMR (126 MHz,  $\text{CDCl}_3$ ):  $\delta$  135.7 (d,  $^3J_{\text{(C-F)}} = 3.0$  Hz, Ar-C<sub>q</sub> minor), 135.5 (d,  $^3J_{\text{(C-F)}} = 3.1$  Hz, Ar-C<sub>q</sub> major), 128.7 (d,  $^4J_{\text{(C-F)}} = 1.2$  Hz, 2 x Ar-C minor), 128.6 (d,  $^4J_{\text{(C-F)}} = 1.3$  Hz, 2 x Ar-C major), 128.3<sub>9</sub> (2 x Ar-C major) 128.3<sub>7</sub> (2 x Ar-C minor), 126.6 (Ar-C major), 126.5 (Ar-C minor), 76.1 (d,  $^1J_{\text{(C-F)}} = 226.2$  Hz, CHF major), 74.3 (d,  $^1J_{\text{(C-F)}} = 226.1$  Hz, CHF minor), 67.6 (CHCH<sub>3</sub> major), 67.1 (d,  $^3J_{\text{(C-F)}} = 1.8$  Hz, CHCH<sub>3</sub> minor), 32.4 (d,  $^2J_{\text{(C-F)}} = 8.1$  Hz, CHCHCH<sub>3</sub> minor), 32.3 (d,  $^2J_{\text{(C-F)}} = 8.1$  Hz, CHCHCH<sub>3</sub> major), 26.2 (d,  $^2J_{\text{(C-F)}} = 11.2$  Hz, Ar-CHCHF major), 26.0 (d,  $^2J_{\text{(C-F)}} = 11.2$  Hz, Ar-CHCHF minor), 22.8 (CH<sub>3</sub> minor), 22.5 (d,  $^4J_{\text{(C-F)}} = 0.8$  Hz, CH<sub>3</sub> major);  $^{19}\text{F}$  NMR (282 MHz,  $\text{CDCl}_3$ )  $\delta$  -220.40 (ddd,  $^2J_{\text{(H-F)}} = 65.4$  Hz,  $^3J_{\text{cis (H-F)}} = 21.2$  Hz,  $^3J_{\text{trans (H-F)}} = 6.4$  Hz, CHF major), -221.37 (ddd,  $^2J_{\text{(H-F)}} = 65.3$  Hz,  $^3J_{\text{cis (H-H)}} = 21.8$  Hz,  $^3J_{\text{trans (H-H)}} = 6.4$  Hz, CHF minor); HRMS (ESI-TOF)  $m/z$  Calcd for C<sub>11</sub>H<sub>12</sub>FO [M-H]<sup>-</sup> 179.0878, Found: 179.0872.

**(R\*)-1-((1R\*,2S\*,3S\*)-2-Fluoro-1-methyl-3-phenylcyclopropyl)pentan-1-ol (4n)**

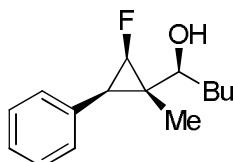

Prepared according to general procedure **6** to afford fluorocyclopropane **4n** as colorless oil (37 mg, 36%, *dr* = 90:10).  $R_f$  = 0.2 (20% EtOAc in hexane). IR (film)/ $\text{cm}^{-1}$  3400, 2928, 2856, 1464, 1073, 737, 698;  $^1\text{H}$  NMR (500 MHz,  $\text{CDCl}_3$ ):  $\delta$  7.35-7.28 (m, 3H, 3 x Ar-H), 7.25-7.22 (m, 2H, 2 x Ar-H), 4.74 (dd,  $^2J_{\text{(H-F)}} = 65.5$  Hz,  $^3J_{\text{cis (H-H)}} = 6.6$  Hz, 1H, CHF), 3.04-3.02 (m, 1H, CHO), 1.98 (t,  $J = 7.1$  Hz, 1H, Ar-CHCHF), 1.65-1.62 (m, 2H, CH<sub>2</sub>), 1.38-1.35 (m, 4H, 2 x CH<sub>2</sub>), 0.96-0.93 (m, 6H, 2 x CH<sub>3</sub>);  $^{13}\text{C}$  NMR (126 MHz,  $\text{CDCl}_3$ ):  $\delta$  134.5 (Ar-C<sub>q</sub>), 128.3 (2 x Ar-C), 128.3 (2 x Ar-C), 126.5 (Ar-C), 78.3 (d,  $^1J_{\text{(C-F)}} = 237.8$  Hz, CHF), 77.0 (CHO), 32.9 (d,  $^4J_{\text{(C-F)}} = 1.9$  Hz, CHCH<sub>2</sub>), 27.7 (d,  $^2J_{\text{(C-F)}} = 9.4$  Hz, Ar-CHCHF), 22.9 (2 x CH<sub>2</sub>), 22.8 (C<sub>q</sub>CHF), 14.2 (CH<sub>2</sub>CH<sub>3</sub>), 7.13 (d,  $J = 8.6$  Hz, C<sub>q</sub>CH<sub>3</sub>);  $^{19}\text{F}$  NMR (470 MHz,  $\text{CDCl}_3$ )  $\delta$  -227.51 (dd,  $^2J_{\text{(H-F)}} = 65.4$  Hz,  $^3J_{\text{trans (H-F)}} = 7.5$  Hz, CHF); HRMS (ESI-TOF)  $m/z$  Calcd for C<sub>15</sub>H<sub>20</sub>FO [M-H]<sup>-</sup> 235.1504; Found: 235.1497.



**(1R\*,2R\*,6R\*,7R\*)-2-Butyl-7-fluorobicyclo[4.1.0]heptan-2-ol ((4o)-minor)**

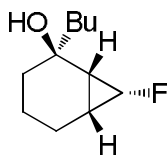

Prepared according to general procedure **6** to afford fluorocyclopropane **4o-(minor)** as yellow oil (66 mg, 41%, *dr* = 60:40).  $R_f$  = 0.4 (30% EtOAc in hexane). IR (film)/ $\text{cm}^{-1}$  3398, 2913, 2855, 1457, 1371, 1050;  $^1\text{H}$  NMR (500 MHz,  $\text{CDCl}_3$ ):  $\delta$  4.66 (dt,  $^2J_{(\text{H-F})} = 68.2$  Hz,  $^3J_{\text{cis}(\text{H-H})} = 6.4$  Hz, 1H, CHF), 1.91-1.84 (m, 1H,  $\text{CH}_a\text{H}_b$ ), 1.70-1.66 (m, 2H,  $\text{CH}_2$ ), 1.53-1.26 (m, 9H, overlapping  $\text{CH}_2$ ), 1.18-1.11 (m, 1H,  $\text{CH}_2\text{CHCHF}$ ), 1.00-0.97 (m, 1H,  $\text{C}_q\text{CHCHF}$ ), 0.93 (t,  $J = 7.3$  Hz, 3H,  $\text{CH}_3$ );  $^{13}\text{C}$  NMR (126 MHz,  $\text{CDCl}_3$ ):  $\delta$  76.8 (d,  $^1J_{(\text{C-F})} = 219.0$  Hz, CHF), 71.3 (d,  $^3J_{(\text{C-F})} = 3.3$  Hz,  $\text{C}_q$ ), 42.2 ( $\text{CH}_2$ ), 36.7 (d,  $^3J_{(\text{C-F})} = 3.2$  Hz,  $\text{CH}_2$ ), 25.6 ( $\text{CH}_2$ ), 23.4 ( $\text{CH}_2$ ), 22.1 (d,  $^2J_{(\text{C-F})} = 8.4$  Hz,  $\text{C}_q\text{CHCHF}$ ), 21.6 ( $\text{CH}_2$ ), 16.2 (d,  $^3J_{(\text{C-F})} = 5.8$  Hz,  $\text{CH}_2$ ) 15.1 (d,  $^2J_{(\text{C-F})} = 10.2$  Hz,  $\text{CH}_2\text{CHCHF}$ ), 14.3 ( $\text{CH}_3$ );  $^{19}\text{F}$  NMR (470 MHz,  $\text{CDCl}_3$ ):  $\delta$  -233.43 (d,  $^2J_{(\text{H-F})} = 68.1$  Hz, CHF); HRMS (ESI-TOF)  $m/z$  Calcd for  $\text{C}_{11}\text{H}_{18}\text{FO}$  [M-H] $^-$  185.1342; Found: 185.1466.

**(1R\*,2R\*,6R\*,7S\*)-2-Butyl-7-fluorobicyclo[4.1.0]heptan-2-ol ((4o)-major and (4o)-minor)**

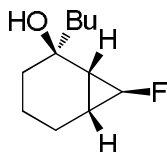

Prepared according to general procedure **6** to afford fluorocyclopropane **4o-(major)** and **4o-(minor)** as yellow oil (66 mg, 41%, *dr* = 60:40 according to  $^{19}\text{F}$  NMR of the crude).  $R_f$  = 0.6 (30% EtOAc in hexane). IR (film)/ $\text{cm}^{-1}$  3442, 2932, 2870, 1662, 1458, 1408, 1378, 1162, 1137, 1088, 1029, 786, 751;  $^1\text{H}$  NMR (500 MHz,  $\text{CDCl}_3$ , mixture of diastereoisomers)  $\delta$  4.66 (dt,  $^2J_{(\text{H-F})} = 68.2$  Hz,  $^3J_{\text{cis}(\text{H-H})} = 6.4$  Hz, 1H, CHF minor) 4.58 (d,  $^2J_{(\text{H-F})} = 64.3$  Hz, 1H, CHF major), 1.91-1.85 (m, 1H,  $\text{CH}_a\text{H}_b$ , overlapping major and minor), 1.79-1.65 (m, 3H,  $\text{CH}_2$ , overlapping major and minor), 1.54-1.50 (m, 2H,  $\text{CH}_2$ , overlapping major and minor), 1.45-1.41 (m, 2H,  $\text{CH}_2$ , overlapping major and minor), 1.36-1.26 (m, 4H, 2 x  $\text{CH}_2$ , overlapping major and minor), 1.18-1.11 (m, 1H,  $\text{CH}_2\text{CHCHF}$ , overlapping major and minor), 1.00-0.97 (m, 1H,  $\text{C}_q\text{CHCHF}$ , overlapping major and minor), 0.93 (t,  $J = 7.5$  Hz, 3H,  $\text{CH}_3$ , overlapping major and minor);  $^{13}\text{C}$  NMR (126 MHz,  $\text{CDCl}_3$ , mixture of diastereoisomers)  $\delta$  76.1 (d,  $^1J_{(\text{C-F})} = 220.7$  Hz, CHF major) 75.1 (d,  $^1J_{(\text{C-F})} = 219.0$  Hz, CHF minor), 71.3 (d,  $^3J_{(\text{C-F})} = 3.1$  Hz,  $\text{C}_q$  minor), 69.1 ( $\text{C}_q$  major), 43.9 ( $\text{CH}_2$  major), 42.2 ( $\text{CH}_2$  minor), 36.7 (d,  $^3J_{(\text{C-F})} = 3.1$  Hz,  $\text{CH}_2$  minor), 35.1 ( $\text{CH}_2$  major), 25.6 ( $\text{CH}_2$  minor), 25.5 ( $\text{CH}_2$  major), 23.4 ( $\text{CH}_2$  minor), 23.3 ( $\text{CH}_2$  major), 22.1 (d,  $^2J_{(\text{C-F})} = 8.5$  Hz,  $\text{C}_q\text{CHCHF}$  overlapping major and minor), 21.6 ( $\text{CH}_2$  minor), 20.7 ( $\text{CH}_2$  major), 18.0 ( $\text{CH}_2$  major), 16.2 (d,  $^3J_{(\text{C-F})} = 5.8$  Hz,  $\text{CH}_2$  minor) 15.1 (d,  $^2J_{(\text{C-F})} = 10.2$  Hz,  $\text{CH}_2\text{CHCHF}$  overlapping major and minor), 14.3 ( $\text{CH}_3$  minor), 14.2 ( $\text{CH}_3$  major);  $^{19}\text{F}$  NMR (470 MHz,  $\text{CDCl}_3$ , mixture of diastereoisomers)  $\delta$  -206.79 (dt,  $^2J_{(\text{H-F})} = 64.5$  Hz,  $^3J_{\text{cis}(\text{H-F})} = 22.5$  Hz, CHF major), -233.44 (d,  $^2J_{(\text{H-F})} = 69.6$  Hz, CHF minor); HRMS (ESI-TOF)  $m/z$  Calcd for  $\text{C}_{11}\text{H}_{20}\text{FO}$  [M+Na] $^+$  209.1312; Found: 209.1313.

**((1R\*,2S\*,3S\*)-2-Fluoro-3-((E)-prop-1-en-1-yl)cyclopropyl)methanol (4p)**

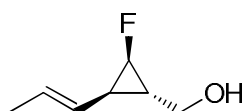

Prepared according to general procedure **6** to afford fluorocyclopropane **4p** as orange oil (82 mg, 73%, *dr* > 95:5).  $R_f = 0.4$  (20% AcOEt in hexane); IR (film)/ $\text{cm}^{-1}$  3401, 2924, 2854, 1650, 1053;  $^1\text{H}$  NMR (500 MHz,  $\text{CDCl}_3$ )  $\delta$  5.67 (m, 1H,  $\text{CH}_3\text{CH}=\text{C}$ ), 5.29-5.24 (m, 1H,  $\text{CH}_3\text{CH}=\text{CH}$ ), 4.52 (ddd,  $^2J_{(\text{H-F})} = 63.9$  Hz,  $^3J_{\text{cis}(\text{H-H})} = 6.4$  Hz,  $^3J_{\text{trans}(\text{H-H})} = 2.4$  Hz, 1H, CHF), 3.56-3.54 (m, 2H,  $\text{CH}_2\text{OH}$ ), 1.70 (d,  $J = 1.7$  Hz, 3H,  $\text{CH}_3$ ), 1.55-1.46 (m, 2H, overlapping  $\text{CHCHF}$  and  $\text{CHCH}_2\text{OH}$ );  $^{13}\text{C}$  NMR (126 MHz,  $\text{CDCl}_3$ )  $\delta$  127.3 ( $\text{CH}_3\text{CH}=\text{C}$ ), 125.5 (d,  $^3J_{(\text{C-F})} = 7.7$  Hz,  $\text{CH}_3\text{CH}=\text{CH}$ ), 75.7 (d,  $^1J_{(\text{C-F})} = 224.4$  Hz, CHF), 62.2 ( $\text{CH}_2\text{OH}$ ), 27.5 (d,  $^2J_{(\text{C-F})} = 9.5$  Hz,  $\text{CHCH}_2\text{OH}$ ), 24.9 (d,  $^2J_{(\text{C-F})} = 10.6$  Hz,  $\text{CHCH}=\text{CHCH}_3$ );  $^{19}\text{F}$  NMR (470 MHz,  $\text{CDCl}_3$ )  $\delta$  -221.26 (ddd,  $^2J_{(\text{H-F})} = 63.9$  Hz,  $^3J_{\text{cis}(\text{H-F})} = 20.7$  Hz,  $^3J_{\text{trans}(\text{H-F})} = 4.9$  Hz, CHF); HRMS (ESI-TOF)  $m/z$  Calcd for  $\text{C}_7\text{H}_{10}\text{FO}$  [ $\text{M-H}$ ] $^-$  129.0716; Found: 129.0919.

**((1R\*,2S\*,3S\*)-2-Fluoro-3-pentylcyclopropyl)methanol (4q)**

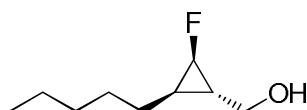

Prepared according to general procedure **6** to afford fluorocyclopropane **4q** as yellow oil (98 mg, 70%, *dr* > 95:5).  $R_f = 0.4$  (20% EtOAc in hexane). IR (film)/ $\text{cm}^{-1}$  3370, 2925, 2855, 1457, 1073;  $^1\text{H}$  NMR (500 MHz,  $\text{CDCl}_3$ )  $\delta$  4.54-4.39 (m, 1H, CHF), 3.48 (d,  $J = 7.0$  Hz, 2H,  $\text{CH}_2\text{OH}$ ), 1.52-1.31 (m, 8H, 4 x  $\text{CH}_2$ ), 1.20-1.14 (m, 1H,  $\text{CHCH}_2\text{OH}$ ), 0.91-0.88 (m, 3H,  $\text{CH}_3$ ), 0.88-0.78 (m, 1H,  $\text{CH}_3(\text{CH}_2)_4\text{CH}$ );  $^{13}\text{C}$  NMR (126 MHz,  $\text{CDCl}_3$ ):  $\delta$  76.0 (d,  $^1J_{(\text{C-F})} = 222.5$  Hz, CHF), 62.9 ( $\text{CH}_2\text{OH}$ ), 31.7 ( $\text{CH}_2$ ), 29.4 ( $\text{CH}_2$ ), 26.4 (d,  $^2J_{(\text{C-F})} = 9.1$  Hz,  $\text{CHCH}_2\text{OH}$ ), 26.1 (d,  $^3J_{(\text{C-F})} = 6.4$  Hz,  $\text{CH}_3(\text{CH}_2)_3\text{CH}_2$ ), 22.7 ( $\text{CH}_2$ ), 22.0 (d,  $^2J_{(\text{C-F})} = 10.9$  Hz,  $\text{CH}_3(\text{CH}_2)_4\text{CHCHF}$ ), 14.2 ( $\text{CH}_3$ );  $^{19}\text{F}$  NMR (470 MHz,  $\text{CDCl}_3$ ):  $\delta$  -224.98 (ddd,  $^2J_{(\text{H-F})} = 64.8$  Hz,  $^3J_{\text{cis}(\text{H-F})} = 20.8$  Hz,  $^3J_{\text{trans}(\text{H-F})} = 5.6$  Hz, CHF); HRMS (ESI-TOF)  $m/z$  Calcd for  $\text{C}_9\text{H}_{18}\text{FO}$  [ $\text{M+H}$ ] $^+$  161.1342; Found: 161.0525.

**((1R\*,2S\*,3S\*)-2-fluoro-3-heptylcyclopropyl)methanol (4r)**

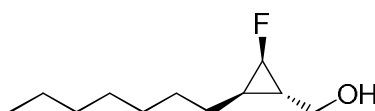

Prepared according to general procedure **6** to afford fluorocyclopropane **4r** as yellow oil (98 mg, 57%, *dr* > 95:5).  $R_f = 0.3$  (50% diethyl ether in hexane); IR (film)/ $\text{cm}^{-1}$  3401, 2926, 2856, 1463, 1456, 1041, 1037;  $^1\text{H}$  NMR (500 MHz,  $\text{CDCl}_3$ )  $\delta$  4.47 (ddd,  $^2J_{(\text{H-F})} = 64.7$  Hz,  $^3J_{\text{cis}(\text{H-H})} = 6.5$  Hz,  $^3J_{\text{trans}(\text{H-H})} = 2.0$  Hz, 1H, CHF), 3.49 (d,  $J = 6.5$  Hz, 2H,  $\text{CH}_2\text{OH}$ ), 1.51-1.48 (m, 2H,  $\text{CH}_2\text{CHCHF}$ ), 1.43-1.40 (m, 2H,  $\text{CH}_2\text{CH}_2\text{CHCHF}$ ), 1.32-1.25 (m, 8H, 4 x  $\text{CH}_2$ ), 1.18-1.15 (m, 1H,  $\text{CHCH}_2\text{OH}$ ), 0.88 (t,  $J = 6.8$  Hz, 3H,  $\text{CH}_3$ ), 0.81-0.75 (m, 1H,  $\text{CH}_3(\text{CH}_2)_6\text{CHCHF}$ );  $^{13}\text{C}$  NMR (126 MHz,  $\text{CDCl}_3$ )  $\delta$  76.0 (d,  $^1J_{(\text{C-F})} = 226.5$  Hz, CHF), 63.0 ( $\text{CH}_2\text{OH}$ ), 32.0 ( $\text{CH}_2$ ), 29.7 ( $\text{CH}_2$ ), 29.4<sub>7</sub> ( $\text{CH}_2$ ), 29.4<sub>0</sub> ( $\text{CH}_2$ ), 26.4 (d,  $^2J_{(\text{C-F})} = 9.1$  Hz,  $\text{CHCH}_2\text{OH}$ ), 26.1 (d,  $^3J_{(\text{C-F})} = 6.3$  Hz,  $\text{CH}_2\text{CHCHF}$ ), 22.8 ( $\text{CH}_2$ ), 22.0 (d,  $^2J_{(\text{C-F})} = 11.0$  Hz,  $\text{CH}_3(\text{CH}_2)_6\text{CHCHF}$ ), 14.3 ( $\text{CH}_3$ );  $^{19}\text{F}$  NMR (470 MHz,  $\text{CDCl}_3$ )  $\delta$  -224.99 (ddd,  $^2J_{(\text{H-F})} = 64.7$  Hz,  $^3J_{\text{cis}(\text{H-F})} = 21.0$  Hz,  $^3J_{\text{trans}(\text{H-F})} = 5.4$  Hz, CHF); HRMS (ESI-TOF)  $m/z$  Calcd for  $\text{C}_{11}\text{H}_{20}\text{FO}$  [ $\text{M-H}$ ] $^-$  187.1504; Found: 187.1501.

#### **((1R\*,2S\*,3S\*)-2-Fluoro-3-octylcyclopropyl)methanol (4s)**

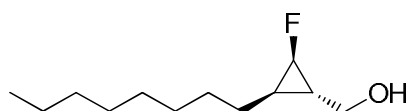

Prepared according to general procedure **6** to afford fluorocyclopropane **4s** as pale yellow oil (105 mg, 60%, *dr* > 95:5).  $R_f = 0.3$  (20% EtOAc in hexane). IR (film)/ $\text{cm}^{-1}$  3367, 2919, 1458, 1031, 666;  $^1\text{H}$  NMR (500 MHz,  $\text{CDCl}_3$ ):  $\delta$  4.46 (ddd,  $^2J_{(\text{H-F})} = 64.7$  Hz,  $^3J_{\text{cis}(\text{H-H})} = 6.5$  Hz,  $^3J_{\text{trans}(\text{H-H})} = 1.9$  Hz, 1H, CHF), 3.47 (d,  $J = 7.0$  Hz, 2H,  $\text{CH}_2\text{OH}$ ), 1.51-1.47 (m, 2H,  $\text{CH}_2$ ), 1.45-1.39 (m, 2H,  $\text{CH}_2$ ), 1.34-1.27 (m, 10H, 5 x  $\text{CH}_2$ ), 1.21-1.12 (m, 1H,  $\text{CHCH}_2\text{OH}$ ), 0.88 (t,  $J = 6.9$  Hz, 3H,  $\text{CH}_3$ ), 0.81-0.74 (m, 1H,  $\text{CH}_3(\text{CH}_2)_7\text{CHCHF}$ );  $^{13}\text{C}$  NMR (126 MHz,  $\text{CDCl}_3$ ):  $\delta$  76.0 (d,  $^1J_{(\text{C-F})} = 222.4$  Hz, CHF), 62.9 ( $\text{CH}_2\text{OH}$ ), 32.0 ( $\text{CH}_2$ ), 29.7 ( $\text{CH}_2$ ), 29.6 ( $\text{CH}_2$ ), 29.5 ( $\text{CH}_2$ ), 29.4 ( $\text{CH}_2$ ), 26.4 (d,  $^2J_{(\text{C-F})} = 9.1$  Hz,  $\text{CHCH}_2\text{OH}$ ), 26.1 (d,  $^3J_{(\text{C-F})} = 6.3$  Hz,  $\text{CH}_3(\text{CH}_2)_6\text{CH}_2\text{CH}$ ), 22.8 ( $\text{CH}_2$ ), 21.9 (d,  $^2J_{(\text{C-F})} = 10.9$  Hz,  $\text{CH}_3(\text{CH}_2)_7\text{CHCHF}$ ), 14.2 ( $\text{CH}_3$ );  $^{19}\text{F}$  NMR (470 MHz,  $\text{CDCl}_3$ ):  $\delta$  -224.96 (ddd,  $^2J_{(\text{H-F})} = 64.7$  Hz,  $^3J_{\text{cis}(\text{H-F})} = 20.8$  Hz,  $^3J_{\text{trans}(\text{H-F})} = 5.6$  Hz, CHF); HRMS (ESI-TOF)  $m/z$  Calcd for  $\text{C}_{12}\text{H}_{22}\text{FO}$  [ $\text{M-H}$ ] $^-$  201.1660; Found: 201.1653.

#### **((1R\*,2S\*,3S\*)-2-Fluoro-3-nonylcyclopropyl)methanol (4t)**

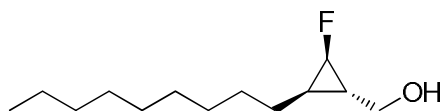

Prepared according to general procedure **6** to afford fluorocyclopropane **4t** as yellow oil (120 mg, 64%, *dr* > 95:5).  $R_f = 0.3$  (50% diethyl ether in hexane); IR (film)/ $\text{cm}^{-1}$  3339, 2921, 2852, 1455, 1049;  $^1\text{H}$  NMR (300 MHz,  $\text{CDCl}_3$ )  $\delta$  4.47 (ddd,  $^2J_{(\text{H-F})} = 64.7$  Hz,  $^3J_{\text{cis}(\text{H-H})} = 6.5$  Hz,  $^3J_{\text{trans}(\text{H-H})} = 2.0$  Hz, 1H, CHF), 3.78-3.47 (m, 6H, overlapping 3 x  $\text{CH}_2$ ), 1.77-1.43 (m, 12H, overlapping 6 x  $\text{CH}_2$ ), 1.16-1.11 (m, 1H,  $\text{CHCH}_2\text{OH}$ ), 0.88 (t,  $J = 6.7$  Hz, 3H,  $\text{CH}_3$ ), 0.82-0.74 (m, 1H,  $\text{CH}_3(\text{CH}_2)_8\text{CHCHF}$ );  $^{13}\text{C}$  NMR (75 MHz,  $\text{CDCl}_3$ )  $\delta$  75.9 (d,  $^1J_{(\text{C-F})} = 222.6$  Hz, CHF), 64.4 ( $\text{CH}_2$ ), 63.0 ( $\text{CH}_2$ ), 61.5 ( $\text{CH}_2$ ), 32.1 ( $\text{CH}_2$ ), 29.7 ( $\text{CH}_2$ ), 29.5 ( $\text{CH}_2$ ), 29.4 ( $\text{CH}_2$ ), 26.5 (d,  $^2J_{(\text{C-F})} = 9.0$  Hz,  $\text{CHCH}_2\text{OH}$ ), 26.1 (d,  $^3J_{(\text{C-F})} = 6.3$  Hz,  $\text{CH}_2$ ), 22.8 ( $\text{CH}_2$ ), 22.0 (d,  $^2J_{(\text{C-F})} = 10.9$  Hz,  $\text{CH}_3(\text{CH}_2)_8\text{CHCHF}$ ), 14.2 ( $\text{CH}_3$ );  $^{19}\text{F}$  NMR (282 MHz,  $\text{CDCl}_3$ )  $\delta$  -224.99 (ddd,  $^2J_{(\text{H-F})} = 65.3$  Hz,  $^3J_{\text{cis}(\text{H-F})} = 21.7$  Hz,  $^3J_{\text{trans}(\text{H-F})} = 6.2$  Hz, CHF); HRMS (ESI-TOF)  $m/z$  Calcd for  $\text{C}_{13}\text{H}_{24}\text{FO}$  [ $\text{M-H}$ ] $^-$  215.1817; Found: 215.1807.

#### **((1R\*,2S\*,3S\*)-2-Fluoro-3-propylcyclopropyl)methanol (4u)**

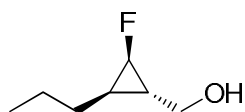

Prepared according to general procedure **6** to afford fluorocyclopropane **4u** as colorless oil (93 mg, 81%, *dr* > 95:5).  $R_f = 0.4$  (60% diethyl ether in hexane); IR (film)/ $\text{cm}^{-1}$  3400, 2957, 2924, 2853, 1730, 1633, 1463, 1377, 1232;  $^1\text{H}$  NMR (500 MHz,  $\text{CDCl}_3$ )  $\delta$  4.47 (ddd,  $^2J_{(\text{H-F})} = 64.7$  Hz,  $^3J_{\text{cis}(\text{H-H})} = 6.5$  Hz,  $^3J_{\text{trans}(\text{H-H})} = 1.9$  Hz, 1H, CHF), 3.49 (d,  $J = 7.0$  Hz, 2H,  $\text{CH}_2\text{OH}$ ), 1.50-1.43 (m, 4H, 2 x  $\text{CH}_2$ ), 1.23-1.14 (m, 1H,  $\text{CHCH}_2\text{OH}$ ), 0.95 (t,  $J = 7.0$  Hz, 3H,  $\text{CH}_3$ ), 0.82-0.79 (m, 1H,  $\text{CH}_3(\text{CH}_2)_2\text{CH}$ );  $^{13}\text{C}$  NMR (75 MHz,  $\text{CDCl}_3$ )  $\delta$  75.91 (d,  $^1J_{(\text{C-F})} = 219.0$  Hz, CHF), 63.0 ( $\text{CH}_2\text{OH}$ ), 28.2 (d,  $^3J_{(\text{C-F})} = 6.3$  Hz,  $\text{CH}_2\text{CHCHF}$ ), 26.4 (d,  $^2J_{(\text{C-F})} = 9.1$  Hz,  $\text{CHCH}_2\text{OH}$ ), 22.8 ( $\text{CH}_3\text{CH}_2$ ), 21.8 (d,  $^2J_{(\text{C-F})} = 10.9$  Hz,  $\text{CHCH}_2\text{CH}_2\text{CH}_3$ ), 13.9 ( $\text{CH}_3$ );  $^{19}\text{F}$  NMR (470 MHz,  $\text{CDCl}_3$ )  $\delta$  -224.89 (ddd,  $^2J_{(\text{H-F})} = 64.8$  Hz,  $^3J_{\text{cis}(\text{H-F})} = 20.6$  Hz,  $^3J_{\text{trans}(\text{H-F})} = 5.6$  Hz, CHF); HRMS (ESI-TOF)  $m/z$  Calcd for  $\text{C}_7\text{H}_{12}\text{FO}$  [ $\text{M-H}$ ] $^-$  131.0878; Found: 131.0848.

**((1R\*,2R\*,3R\*)-2-Fluoro-3-propylcyclopropyl)methanol (4v)**

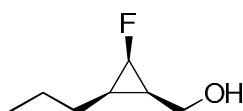

Prepared according to general procedure 6 to afford fluorocyclopropane **4v** as colorless oil (91 mg, 80%, *dr* = 80:20, *selected data for major*).  $R_f$  = 0.3 (50% diethyl ether in hexane); IR (film)/ $\text{cm}^{-1}$  3392, 2923, 2853, 1463, 1377, 1233, 1052;  $^1\text{H}$  NMR (500 MHz,  $\text{CDCl}_3$ , *selected data for major*)  $\delta$  4.69 (dt,  $^2J_{(\text{H-F})} = 66.2$  Hz,  $^3J_{\text{cis}(\text{H-H})} = 6.0$  Hz, 1H, CHF), 3.87 (dd,  $J = 11.3, 6.8$  Hz, 1H,  $\text{CH}_a\text{H}_b\text{OH}$ ), 3.79 (dd,  $J = 11.4, 8.9$  Hz, 1H,  $\text{CH}_a\text{H}_b\text{OH}$ ) 1.46-1.42 (m, 2H,  $\text{CH}_2\text{CH}_3$ ), 1.30-1.28 (m, 2H,  $\text{CH}_3\text{CH}_2\text{CH}_2$ ), 1.18-1.14 (m, 1H,  $\text{CHCH}_2\text{OH}$ ), 0.95 (t,  $J = 7.1$  Hz, 3H,  $\text{CH}_3$ ), 0.88-0.84 (m, 1H,  $\text{CH}_3(\text{CH}_2)_2\text{CHCHF}$ );  $^{13}\text{C}$  NMR (126 MHz,  $\text{CDCl}_3$ , *selected data for major*)  $\delta$  73.7 (d,  $^1J_{(\text{C-F})} = 217.6$  Hz, CHF), 57.5 (d,  $^3J_{(\text{C-F})} = 9.3$  Hz,  $\text{CH}_2\text{OH}$ ), 29.9 ( $\text{CH}_3\text{CH}_2\text{CH}_2$ ), 23.2 ( $\text{CH}_2\text{CH}_3$ ), 20.5 (d,  $^2J_{(\text{C-F})} = 9.7$  Hz,  $\text{CHCH}_2\text{OH}$ ), 19.4 (d,  $^2J_{(\text{C-F})} = 10.5$  Hz,  $\text{CH}_3(\text{CH}_2)_2\text{CHCHF}$ ), 14.0 ( $\text{CH}_3\text{CH}_2$ );  $^{19}\text{F}$  NMR (470 MHz,  $\text{CDCl}_3$ , *selected data for major*)  $\delta$  -239.88 (dt,  $^2J_{(\text{H-F})} = 66.2$  Hz,  $^3J_{\text{trans}(\text{H-F})} = 7.9$  Hz, CHF); HRMS (ESI-TOF)  $m/z$  Calcd for  $\text{C}_7\text{H}_{13}\text{FNaO}$   $[\text{M}+\text{Na}]^+$  155.0843; Found: 155.0839.

**((1R\*,2S\*,3S\*)-2-Fluoro-3-hexylcyclopropyl)methanol (4w)**

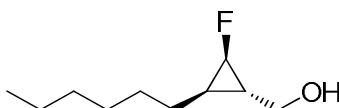

Prepared according to general procedure 6 to afford fluorocyclopropane **4w** as yellow oil (83 mg, 55%, *dr* > 95:5).  $R_f$  = 0.3 (50% diethyl ether in hexane); IR (film)/ $\text{cm}^{-1}$  3367, 2923, 2855, 1461, 1033;  $^1\text{H}$  NMR (500 MHz,  $\text{CDCl}_3$ )  $\delta$  4.47 (ddd,  $^2J_{(\text{H-F})} = 64.7$  Hz,  $^3J_{\text{cis}(\text{H-H})} = 6.5$  Hz,  $^3J_{\text{trans}(\text{H-H})} = 1.9$  Hz, 1H, CHF), 3.49-3.48 (m, 2H,  $\text{CH}_2\text{OH}$ ), 1.53-1.48 (m, 2H,  $\text{CH}_2\text{CH}_3$ ), 1.46-1.29 (m, *overlapping* 4 x  $\text{CH}_2$ ), 1.21-1.14 (m, 1H,  $\text{CHCH}_2\text{OH}$ ), 0.89 (t,  $J = 6.9$  Hz, 3H,  $\text{CH}_3$ ), 0.81-0.77 (m, 1H,  $\text{CH}(\text{CH}_2)_5\text{CH}_3$ );  $^{13}\text{C}$  NMR (126 MHz,  $\text{CDCl}_3$ )  $\delta$  75.9 (d,  $^1J_{(\text{C-F})} = 222.7$  Hz, CHF), 63.0 ( $\text{CH}_2\text{OH}$ ), 31.9 ( $\text{CH}_2$ ), 29.7 ( $\text{CH}_2$ ), 29.1 ( $\text{CH}_2$ ), 26.4 (d,  $^2J_{(\text{C-F})} = 9.1$  Hz,  $\text{CHCH}_2\text{OH}$ ), 26.1 (d,  $^3J_{(\text{C-F})} = 6.4$  Hz,  $\text{CH}_3(\text{CH}_2)_4\text{CH}_2\text{CHCHF}$ ), 22.8 ( $\text{CH}_2$ ), 22.0 (d,  $^2J_{(\text{C-F})} = 10.9$  Hz,  $\text{CH}(\text{CH}_2)_5\text{CH}_3$ ), 14.2 ( $\text{CH}_3$ );  $^{19}\text{F}$  NMR (470 MHz,  $\text{CDCl}_3$ )  $\delta$  -224.99 (ddd,  $^2J_{(\text{H-F})} = 64.7$  Hz,  $^3J_{\text{cis}(\text{H-F})} = 20.7$  Hz,  $^3J_{\text{trans}(\text{H-F})} = 5.6$  Hz, CHF); HRMS (ESI-TOF)  $m/z$  Calcd for  $\text{C}_{10}\text{H}_{18}\text{FO}$   $[\text{M}-\text{H}]^-$  173.1347; Found: 173.1350.

**((1R\*,2R\*,3R\*)-2-Fluoro-3-hexylcyclopropyl)methanol (4x)**

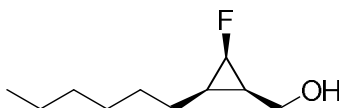

Prepared according to general procedure 6 to afford fluorocyclopropane **4x** as yellow oil (122 mg, 81%, *dr* = 70:30, *selected data for major*).  $R_f$  = 0.3 (50% diethyl ether in hexane); IR (film)/ $\text{cm}^{-1}$  3368, 2926, 2857, 1466, 1423, 1378, 1247, 1216, 1136, 1029;  $^1\text{H}$  NMR (500 MHz,  $\text{CDCl}_3$ , *selected data for major*)  $\delta$  4.67 (dt,  $^2J_{(\text{H-F})} = 66.2$  Hz,  $^3J_{\text{cis}(\text{H-H})} = 6.0$  Hz, 1H, CHF), 3.86 (dd,  $J = 11.5, 6.7$  Hz, 1H,  $\text{CH}_a\text{H}_b\text{OH}$ ), 3.77 (dd,  $J = 11.6, 8.8$  Hz, 1H,  $\text{CH}_a\text{H}_b\text{OH}$ ), 1.52-1.29 (m, 10H, 5 x  $\text{CH}_2$ ), 1.19-1.11 (m, 1H,  $\text{CHCH}_2\text{OH}$ ), 0.93-0.91 (m, 1H,  $\text{CH}_3(\text{CH}_2)_5\text{CHCHF}$ ), 0.88 (t,  $J = 6.8$  Hz, 3H,  $\text{CH}_3$ );  $^{13}\text{C}$  NMR (126 MHz,  $\text{CDCl}_3$ , *selected data for major*)  $\delta$  73.7 (d,  $^1J_{(\text{C-F})} = 217.6$  Hz, CHF), 57.4 (d,  $^3J_{(\text{C-F})} = 9.3$  Hz,  $\text{CH}_2\text{OH}$ ), 31.9 ( $\text{CH}_2$ ), 30.0 ( $\text{CH}_2$ ), 29.2 ( $\text{CH}_2$ ), 22.8 ( $\text{CH}_2$ ), 21.3 (d,  $^3J_{(\text{C-F})} = 6.8$  Hz,  $\text{CH}_2\text{CHCHF}$ ), 20.5 (d,  $^2J_{(\text{C-F})} = 9.7$  Hz,  $\text{CHCH}_2\text{OH}$ ), 19.6 (d,  $^2J_{(\text{C-F})} = 10.5$  Hz,  $\text{CH}_3(\text{CH}_2)_5\text{CHCHF}$ ), 14.2 ( $\text{CH}_3$ );  $^{19}\text{F}$  NMR (470 MHz,  $\text{CDCl}_3$ , *selected data for major*)  $\delta$  -240.00 (dt,  $^2J_{(\text{H-F})} = 66.2$  Hz,  $^3J_{\text{trans}(\text{H-F})} = 7.9$  Hz, CHF); HRMS (ESI-TOF)  $m/z$  Calcd for  $\text{C}_{10}\text{H}_{18}\text{FO}$   $[\text{M}-\text{H}]^-$  173.1347; Found: 173.1339.

**((1R\*,2R\*,3R\*)-3-Fluoro-2-methyl-2-(4-methylpent-3-en-1-yl)cyclopropyl)methanol (4y-(major))**

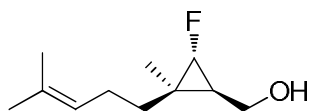

Prepared according to general procedure **6** to afford fluorocyclopropane **4y-(major)** as pale yellow oil (111 mg, 74%, *dr* = 70:30, selected data for major according to  $^{19}\text{F}$  NMR of the crude).  $R_f$  = 0.5 (60% diethyl ether in hexane); IR (film)/ $\text{cm}^{-1}$  3369, 2923, 1456, 1041;  $^1\text{H}$  NMR (500 MHz,  $\text{CDCl}_3$ , selected data for major)  $\delta$  5.09-5.08 (m, 1H,  $\text{CH}=\text{C}(\text{CH}_3)_2$ ), 4.18 (dd,  $^2J_{(\text{H-F})} = 64.6$  Hz,  $^3J_{\text{trans}(\text{H-H})} = 2.5$  Hz, 1H, CHF), 3.68-3.65 (m, 1H,  $\text{CHCH}_a\text{CH}_b\text{OH}$ ), 3.59-3.55 (m, 1H,  $\text{CHCH}_a\text{CH}_b\text{OH}$ ), 2.05-1.99 (m, 2H,  $\text{CH}_2\text{CH}=\text{C}(\text{CH}_3)_2$ ), 1.69 (s, 3H,  $(\text{CH}_3)_2\text{C}=\text{CH}$ ), 1.62 (s, 3H,  $(\text{CH}_3)_2\text{C}=\text{CH}$ ), 1.37-1.33 (m, 2H,  $\text{CH}_2\text{CH}_2\text{CH}=\text{C}(\text{CH}_3)_2$ ), 1.23 (d,  $J = 1.3$  Hz, 3H,  $\text{CH}_3\text{C}_q\text{CHF}$ ), 1.21 (m, 1H,  $\text{CHCHF}$ );  $^{13}\text{C}$  NMR (126 MHz,  $\text{CDCl}_3$ , selected data for major)  $\delta$  132.3 ( $(\text{CH}_3)_2\text{C}=\text{CH}$ ), 123.9 ( $(\text{CH}_3)_2\text{C}=\text{CH}$ ), 81.0 (d,  $^1J_{(\text{C-F})} = 229.8$  Hz, CHF), 60.4 ( $\text{CH}_2\text{OH}$ ), 32.5 (d,  $^2J_{(\text{C-F})} = 8.9$  Hz,  $\text{CHCHF}$ ), 29.8 ( $\text{CH}_2\text{CH}_2\text{CH}=\text{C}(\text{CH}_3)_2$ ), 25.8 ( $\text{CH}_3\text{C}=\text{CH}$ ), 24.9 (d,  $^3J_{(\text{C-F})} = 1.9$  Hz,  $\text{CH}_2\text{CH}=\text{C}(\text{CH}_3)_2$ ), 22.8 ( $\text{C}_q\text{CHF}$ ), 17.7 ( $(\text{CH}_3)_2\text{C}=\text{CH}$ ), 17.3 (d,  $^3J_{(\text{C-F})} = 8.7$  Hz,  $\text{CH}_3\text{C}_q\text{CHF}$ );  $^{19}\text{F}$  NMR (470 MHz,  $\text{CDCl}_3$ , selected data for major)  $\delta$  -216.96 (dd,  $^2J_{(\text{H-F})} = 64.7$  Hz,  $^3J_{\text{cis}(\text{H-F})} = 22.1$  Hz, CHF); HRMS (ESI-TOF)  $m/z$  Calcd for  $\text{C}_{11}\text{H}_{18}\text{FO}$  [ $\text{M-H}$ ] $^-$  185.1347; Found: 185.1333.

**((1R\*,2R\*,3S\*)-3-Fluoro-2-methyl-2-(4-methylpent-3-en-1-yl)cyclopropyl)methanol (4y-(minor))**

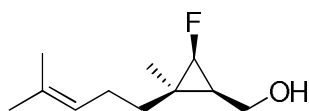

Prepared according to general procedure **6** to afford fluorocyclopropane **4y-(minor)** as pale yellow oil (111 mg, 74%, *dr* = 70:30).  $R_f$  = 0.4 (60% diethyl ether in hexane); IR (film)/ $\text{cm}^{-1}$  3369, 2923, 1456, 1041;  $^1\text{H}$  NMR (500 MHz,  $\text{CDCl}_3$ )  $\delta$  5.13 (t,  $J = 7.2$  Hz, 1H,  $\text{CH}=\text{C}(\text{CH}_3)_2$ ), 4.36 (dd,  $^2J_{(\text{H-F})} = 65.8$  Hz,  $^3J_{\text{cis}(\text{H-H})} = 6.1$  Hz, 1H, CHF), 3.90-3.86 (m, 1H,  $\text{CHCH}_a\text{CH}_b\text{OH}$ ), 3.77-3.73 (m, 1H,  $\text{CHCH}_a\text{CH}_b\text{OH}$ ), 2.14-1.99 (m, 2H,  $\text{CH}_2\text{CH}=\text{C}(\text{CH}_3)_2$ ), 1.69 (s, 3H,  $(\text{CH}_3)_2\text{C}=\text{CH}$ ), 1.62 (s, 3H,  $(\text{CH}_3)_2\text{C}=\text{CH}$ ), 1.54-1.49 (m, 2H,  $\text{CH}_2\text{CH}_2\text{CH}=\text{C}(\text{CH}_3)_2$ ), 1.00 (t,  $J = 4.9$  Hz, 3H,  $\text{CH}_3\text{C}_q\text{CHF}$ ), 1.01-0.95 (m, 1H,  $\text{CHCHF}$ );  $^{13}\text{C}$  NMR (126 MHz,  $\text{CDCl}_3$ )  $\delta$  132.1 ( $(\text{CH}_3)_2\text{C}=\text{CH}$ ), 124.2 ( $(\text{CH}_3)_2\text{C}=\text{CH}$ ), 79.4 (d,  $^1J_{(\text{C-F})} = 222.0$  Hz, CHF), 57.9 (d,  $^3J_{(\text{C-F})} = 9.6$  Hz,  $\text{CH}_2\text{OH}$ ), 29.3 (d,  $^2J_{(\text{C-F})} = 9.8$  Hz,  $\text{CHCHF}$ ), 27.6 (d,  $^3J_{(\text{C-F})} = 6.8$  Hz,  $\text{CH}_2\text{CH}_2\text{CH}=\text{C}(\text{CH}_3)_2$ ), 25.8 ( $\text{CH}_3\text{C}=\text{CH}$ ), 25.2 ( $\text{CH}_2\text{CH}=\text{C}(\text{CH}_3)_2$ ), 22.9 (d,  $^2J_{(\text{C-F})} = 9.0$  Hz,  $\text{C}_q\text{CHF}$ ), 22.2 ( $\text{CH}_3\text{C}_q\text{CHF}$ ), 17.7 ( $\text{CH}_3\text{C}=\text{CH}$ );  $^{19}\text{F}$  NMR (470 MHz,  $\text{CDCl}_3$ )  $\delta$  -231.11 (dd,  $^2J_{(\text{H-F})} = 65.5$  Hz,  $^3J_{\text{trans}(\text{H-F})} = 5.2$  Hz, CHF); HRMS (ESI-TOF)  $m/z$  Calcd for  $\text{C}_{11}\text{H}_{18}\text{FO}$  [ $\text{M-H}$ ] $^-$  185.1347; Found: 185.1333.

**((1R\*,2S\*,3R\*)-3-Fluoro-2-methyl-2-(4-methylpent-3-en-1-yl)cyclopropyl)methanol (4z-(major))**

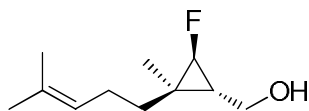

Prepared according to general procedure **6** to afford fluorocyclopropane **4z-(major)** as pale yellow oil (127 mg, 88%, *dr* = 55:45).  $R_f$  = 0.4 (60% diethyl ether in hexane); IR (film)/ $\text{cm}^{-1}$  3371, 2923, 2853, 1730, 1455, 1233, 1046;  $^1\text{H}$  NMR (500 MHz,  $\text{CDCl}_3$ )  $\delta$  5.15 (t,  $J = 7.1$  Hz, 1H,  $\text{CH}=\text{C}(\text{CH}_3)_2$ ), 4.18 (dd,  $^2J_{(\text{H-F})} = 64.3$  Hz,  $^3J_{\text{trans}(\text{H-H})} = 2.4$  Hz, 1H, CHF), 3.75 (dd,  $J = 11.5, 6.7$  Hz, 1H,  $\text{CHCH}_a\text{CH}_b\text{OH}$ ), 3.47 (t,  $J = 10.1$  Hz, 1H,  $\text{CHCH}_a\text{CH}_b\text{OH}$ ), 2.18-2.10 (m, 2H,  $\text{CH}_2\text{CH}=\text{C}(\text{CH}_3)_2$ ), 1.69 (s, 3H,  $\text{CH}_3\text{C}=\text{CH}$ ), 1.63 (s, 3H,  $\text{CH}_3\text{C}=\text{CH}$ ), 1.53-1.50 (m, 2H,  $\text{CH}_2\text{CH}_2\text{CH}=\text{C}(\text{CH}_3)_2$ ), 1.30-1.27 (m, 1H,  $\text{CHCHF}$ ), 1.04 (d,  $J = 3.0$  Hz, 3H,  $\text{CH}_3\text{C}_q\text{CHF}$ );  $^{13}\text{C}$  NMR (126 MHz,  $\text{CDCl}_3$ )  $\delta$  131.9 ( $(\text{CH}_3)_2\text{C}=\text{CH}$ ), 124.3 ( $(\text{CH}_3)_2\text{C}=\text{CH}$ ), 81.6 (d,  $^1J_{(\text{C-F})} = 229.5$  Hz, CHF), 60.6 ( $\text{CH}_2\text{OH}$ ), 33.7 (d,  $^3J_{(\text{C-F})} = 6.4$  Hz,  $\text{CH}_2\text{CH}_2\text{CH}=\text{C}(\text{CH}_3)_2$ ), 31.6 (d,  $^2J_{(\text{C-F})} = 9.4$  Hz,  $\text{CHCHF}$ ), 25.8 ( $\text{CH}_3\text{C}=\text{CH}$ ), 25.42 (d,  $^2J_{(\text{C-F})} = 10.1$  Hz,  $\text{C}_q\text{CHF}$ ),

25.4 (CH<sub>2</sub>CH=C(CH<sub>3</sub>)<sub>2</sub>), 17.7 (CH<sub>3</sub>C=CH), 15.7 (d, <sup>3</sup>J<sub>(C-F)</sub> = 1.4 Hz, CH<sub>3</sub>C<sub>q</sub>CHF); <sup>19</sup>F NMR (470 MHz, CDCl<sub>3</sub>) δ -216.25 (dd, <sup>2</sup>J<sub>(H-F)</sub> = 64.3 Hz, <sup>3</sup>J<sub>cis (H-F)}</sub> = 22.6 Hz, CHF); HRMS (ESI-TOF) *m/z* Calcd for C<sub>11</sub>H<sub>18</sub>FO [M-H]<sup>-</sup> 185.1347; Found: 185.1354.

**((1R\*,2S\*,3S\*)-3-Fluoro-2-methyl-2-(4-methylpent-3-en-1-yl)cyclopropyl)methanol (4z-(minor))**

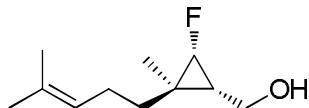

Prepared according to general procedure 6 to afford fluorocyclopropane **4z-(minor)** as pale yellow oil (127 mg, 88%, *dr* = 55:45). Compound **4z-(minor)** mixture with *trans*-geraniol **2z**. *R<sub>f</sub>* = 0.6 (60% diethyl ether in hexane); IR (film)/cm<sup>-1</sup> 3338, 2967, 2917, 1669, 1439, 1377, 1109, 1014, 832; <sup>1</sup>H NMR (500 MHz, CDCl<sub>3</sub>, *selected data for minor*) δ 5.05-5.03 (m, 1H, CH=C(CH<sub>3</sub>)<sub>2</sub>), 4.31 (dd, <sup>2</sup>J<sub>(H-F)}</sub> = 66.0 Hz, <sup>3</sup>J<sub>cis (H-H)}</sub> = 6.2 Hz, 1H, CHF), 3.79-3.70 (m, 2H, CH<sub>2</sub>OH), 2.01-2.00 (m, 2H, CH<sub>2</sub>CH=C(CH<sub>3</sub>)<sub>2</sub>), 1.67 (s, 6H, (CH<sub>3</sub>)<sub>2</sub>C=CH), 1.32-1.25 (m, 1H, CH<sub>a</sub>H<sub>b</sub>CH<sub>2</sub>CH=C), 1.11 (d, *J* = 1.5 Hz, 3H, CH<sub>3</sub>C<sub>q</sub>CHF), 1.07-1.00 (m, 1H, CH<sub>a</sub>H<sub>b</sub>CH<sub>2</sub>CH=C), 0.97-0.91 (m, 1H, CHCHF); <sup>13</sup>C NMR (126 MHz, CDCl<sub>3</sub>) δ 131.9 ((CH<sub>3</sub>)<sub>2</sub>C=CH), 123.8 ((CH<sub>3</sub>)<sub>2</sub>C=CH), 78.5 (d, <sup>1</sup>J<sub>(C-F)}</sub> = 223.1 Hz, CHF), 57.8 (d, <sup>3</sup>J<sub>(C-F)}</sub> = 9.1 Hz, CH<sub>2</sub>OH), 38.6 (CH<sub>2</sub>CH<sub>2</sub>CH=C) 27.8 (d, <sup>2</sup>J<sub>(C-F)}</sub> = 9.9 Hz, CHCHF), 24.3 (d, <sup>4</sup>J<sub>(C-F)}</sub> = 2.0 Hz, CH<sub>2</sub>CH<sub>2</sub>CH=C), 22.8 (d, <sup>2</sup>J<sub>(C-F)}</sub> = 8.7 Hz, C<sub>q</sub>CH<sub>3</sub>CHF), 17.7 ((CH<sub>3</sub>)<sub>2</sub>C=CH), 10.2 (d, <sup>3</sup>J<sub>(C-F)}</sub> = 9.3 Hz, CH<sub>3</sub>C<sub>q</sub>CHF); <sup>19</sup>F NMR (470 MHz, CDCl<sub>3</sub>) δ -230.82 (dd, <sup>2</sup>J<sub>(H-F)}</sub> = 66.0 Hz, <sup>3</sup>J<sub>trans (H-F)}</sub> = 6.7 Hz, CHF); HRMS (ESI-TOF) *m/z* Calcd for C<sub>11</sub>H<sub>18</sub>FO [M-H]<sup>-</sup> 185.1347; Found: 185.0950.

**((1R\*,4R\*,7R\*)-7-Fluoro-4-(prop-1-en-2-yl)bicyclo[4.1.0]heptan-1-yl)methanol (4aa)**

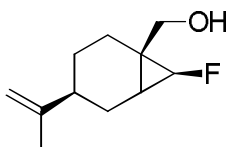

Prepared according to general procedure 6 to afford fluorocyclopropane **4aa** as yellow oil (69 mg, 36%, *dr* = 70:30, *inseparable mixture of diastereoisomers*). *R<sub>f</sub>* = 0.2 (50% EtOAc in hexane); IR (film)/cm<sup>-1</sup> 3434, 2926, 2856, 1644, 1468, 1266, 1014; <sup>1</sup>H NMR (500 MHz, CDCl<sub>3</sub>, *selected data for major*) δ 4.73-4.67 (m, 2H, C<sub>q</sub>=CH<sub>2</sub>), 4.37 (dd, <sup>2</sup>J<sub>(H-F)}</sub> = 67.2 Hz, <sup>3</sup>J<sub>cis (H-H)}</sub> = 6.7 Hz, 1H, CHF), 3.37-3.29 (m, 2H, CH<sub>2</sub>OH), 2.13-2.09 (m, 1H, CH<sub>a</sub>H<sub>b</sub>CHC<sub>q</sub>=CH<sub>2</sub>), 2.00-1.96 (m, 1H, CH<sub>a</sub>H<sub>b</sub>CHCHF), 1.87-1.79 (m, 2H, *overlapping* CH<sub>a</sub>H<sub>b</sub>CHC<sub>q</sub>=CH<sub>2</sub> and CHC<sub>q</sub>=CH<sub>2</sub>), 1.70 (s, 3H, CH<sub>3</sub>), 1.60-1.57 (m, 1H, CH<sub>a</sub>CH<sub>b</sub>CH<sub>2</sub>CHC<sub>q</sub>=CH<sub>2</sub>), 1.39-1.33 (m, 1H, CH<sub>a</sub>H<sub>b</sub>CHCHF), 1.18-1.16 (m, 1H, CH<sub>a</sub>CH<sub>b</sub>CH<sub>2</sub>CHC<sub>q</sub>=CH<sub>2</sub>), 1.07-1.02 (m, 1H, CHCHF); <sup>13</sup>C NMR (126 MHz, CDCl<sub>3</sub>, *selected data for major*) δ 150.2 (C<sub>q</sub>=CH<sub>2</sub>), 108.9 (C<sub>q</sub>=CH<sub>2</sub>), 77.6 (d, <sup>1</sup>J<sub>(C-F)}</sub> = 225.1 Hz, CHF), 68.8 (CH<sub>2</sub>OH), 41.7 (CH<sub>2</sub>=C<sub>q</sub>CH), 27.0 (d, <sup>4</sup>J<sub>(C-F)}</sub> = 4.8 Hz, CH<sub>2</sub>CH<sub>2</sub>CHC<sub>q</sub>=CH<sub>2</sub>), 23.1 (d, <sup>5</sup>J<sub>(C-F)}</sub> = 3.6 Hz, CH<sub>2</sub>CH<sub>2</sub>CHC<sub>q</sub>=CH<sub>2</sub>), 22.1 (d, <sup>3</sup>J<sub>(C-F)}</sub> = 5.2 Hz, CH<sub>2</sub>CHCHF), 20.9 (CH<sub>3</sub>), 16.9 (d, <sup>2</sup>J<sub>(C-F)}</sub> = 10.1 Hz, CHCHF); <sup>19</sup>F NMR (470 MHz, CDCl<sub>3</sub>) δ -228.33 (dd, <sup>2</sup>J<sub>(H-F)}</sub> = 67.2 Hz, <sup>3</sup>J<sub>trans (H-F)}</sub> = 9.8 Hz, CHF *minor*), -229.73 (d, <sup>2</sup>J<sub>(H-F)}</sub> = 67.1 Hz, CHF *major*); HRMS (ESI-TOF) *m/z* Calcd for C<sub>11</sub>H<sub>16</sub>FO [M-H]<sup>-</sup> 183.1191; Found: 183.1187.

**((1*S*\*,2*R*\*,3*S*\*)-2-fluoro-3-phenylcyclopropyl)methanol (**4ad**)**

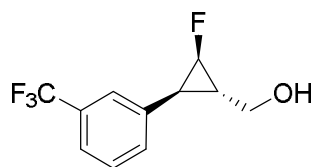

Prepared according to general procedure **6** to afford fluorocyclopropane **4ad** as colourless oil (21 mg, 15 %, *dr* > 95:5).  $R_f = 0.4$  (40% EtOAc in hexane);  $^1\text{H NMR}$  (500 MHz,  $\text{CDCl}_3$ ):  $\delta$  7.51-7.49 (m, 2H, 2 x Ar-H), 7.43-7.42 (m, 2H, 2 x Ar-H), 4.75 (ddd,  $^2J_{\text{(H-F)}} = 64.6$  Hz,  $^3J_{\text{cis (H-H)}} = 6.6$  Hz,  $^3J_{\text{trans (H-H)}} = 2.5$  Hz, 1H, CHF), 3.74 (d,  $^3J_{\text{(H-H)}} = 6.1$  Hz, 2H,  $\text{CH}_2\text{OH}$ ), 2.18-2.14 (m, 1H, Ar-CHCHF), 2.01-1.92 (m, 1H, CHCH $_2$ OH);  $^{13}\text{C NMR}$  (126 MHz,  $\text{CDCl}_3$ ):  $\delta$  136.6 (d,  $^4J_{\text{(C-F)}} = 2.9$  Hz, Ar-C $_q$ ), 131.9 (Ar-C), 128.8 (Ar-C $_q$ ), 125.6-125.5 (m, Ar-C), 123.4 $_5$  (q,  $^3J_{\text{(C-F)}} = 3.8$  Hz, Ar-C), 75.2 (d,  $^1J_{\text{(C-F)}} = 227.1$  Hz, CHF), 61.9 ( $\text{CH}_2\text{OH}$ ), 27.5 $_5$  (d,  $^2J_{\text{(C-F)}} = 8.7$  Hz, CHCH $_2$ OH), 26.1 $_5$  (d,  $^2J_{\text{(C-F)}} = 11.0$  Hz, Ar-CHCHF);  $^{19}\text{F NMR}$  (470 MHz,  $\text{CDCl}_3$ ):  $\delta$  62.70 (s, 3F,  $\text{CF}_3$ ), -220.77 (ddd,  $^2J_{\text{(H-F)}} = 64.6$  Hz,  $^3J_{\text{cis (H-F)}} = 20.8$  Hz,  $^3J_{\text{trans (H-F)}} = 6.0$  Hz, CHF); HRMS (ESI-TOF)  $m/z$  Calcd for  $\text{C}_{11}\text{H}_9\text{F}_4\text{O}$  [M-H] $^-$  233.0595; Found: 233.0591.

## 8. Synthesis of chiral allylic alcohol and fluorocyclopropane

Chiral allylic alcohol (**R**)-**2m** was prepared using the correspondent ketone, (*S*)-CBS-Butyl and catecholborane according to the literature procedure.<sup>18</sup>

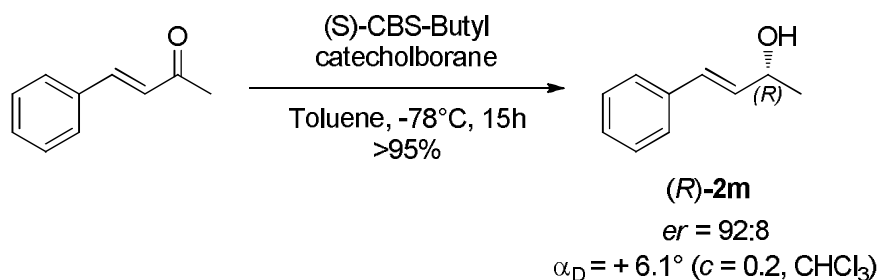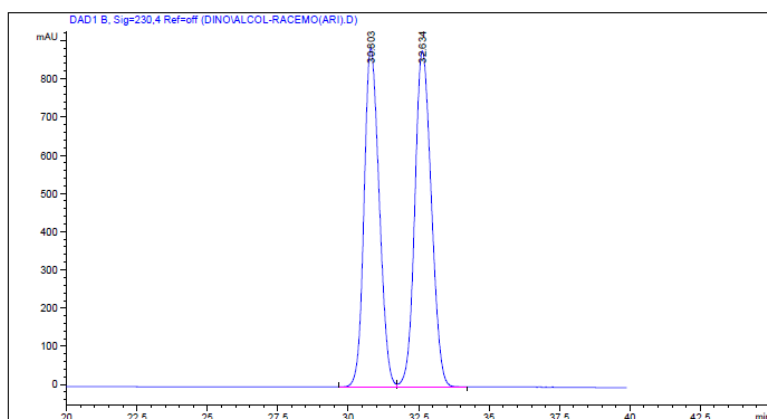

Signal 1: DAD1 B, Sig=230,4 Ref=off

| Peak # | RetTime [min] | Type | Width [min] | Area [mAU*s] | Height [mAU] | Area %  |
|--------|---------------|------|-------------|--------------|--------------|---------|
| 1      | 30.803        | BV   | 0.5858      | 3.31313e4    | 886.97919    | 48.0282 |
| 2      | 32.634        | VB   | 0.6356      | 3.58517e4    | 879.43799    | 51.9718 |

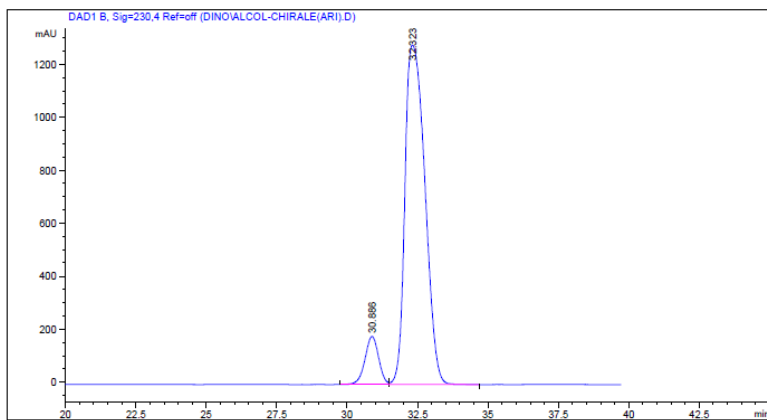

Signal 1: DAD1 B, Sig=230,4 Ref=off

| Peak # | RetTime [min] | Type | Width [min] | Area [mAU*s] | Height [mAU] | Area %  |
|--------|---------------|------|-------------|--------------|--------------|---------|
| 1      | 30.886        | BV   | 0.5224      | 6089.12695   | 181.04192    | 8.8023  |
| 2      | 32.323        | VB   | 0.7963      | 6.30874e4    | 1281.53003   | 91.1977 |

Chiralpak AD-H column; 99:1 = hexane:iPrOH, 1mL/min flux.



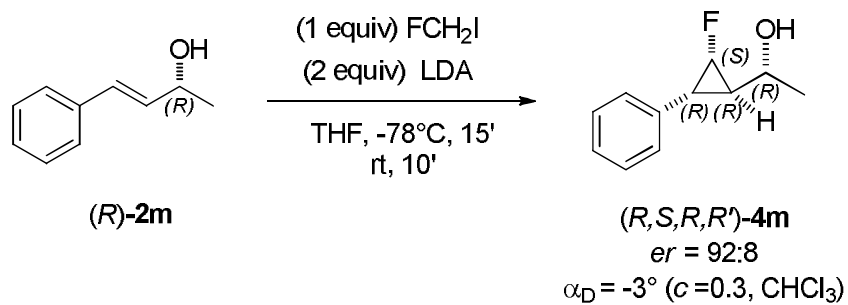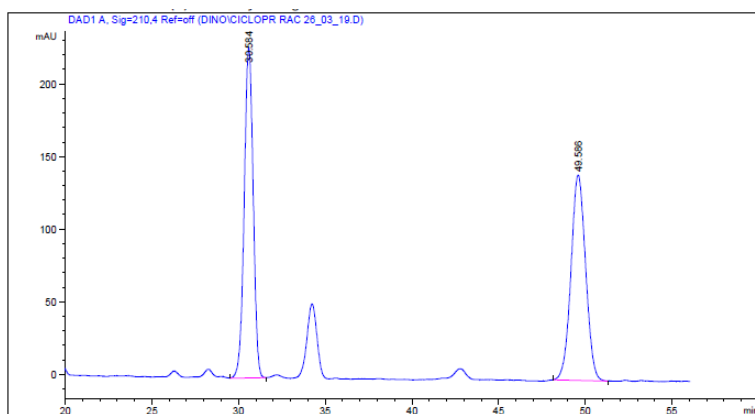

Signal 1: DAD1 A, Sig=210,4 Ref=off

| Peak # | RetTime [min] | Type | Width [min] | Area [mAU*s] | Height [mAU] | Area %  |
|--------|---------------|------|-------------|--------------|--------------|---------|
| 1      | 30.584        | BB   | 0.5658      | 8183.22168   | 227.40143    | 49.6489 |
| 2      | 49.586        | BB   | 0.8465      | 8298.96875   | 141.44919    | 50.3511 |

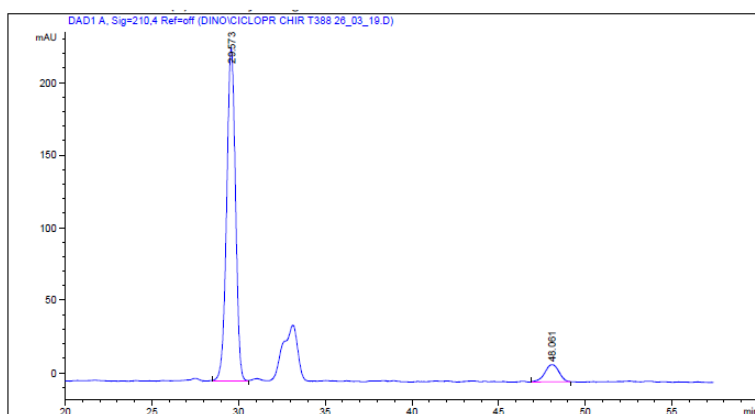

Signal 1: DAD1 A, Sig=210,4 Ref=off

| Peak # | RetTime [min] | Type | Width [min] | Area [mAU*s] | Height [mAU] | Area %  |
|--------|---------------|------|-------------|--------------|--------------|---------|
| 1      | 29.573        | BB   | 0.5501      | 8081.93359   | 228.78384    | 92.4053 |
| 2      | 48.061        | BB   | 0.6658      | 664.24219    | 11.89026     | 7.5947  |

Chiralpak AD-H column; 99:1 = hexane:iPrOH, 1mL/min flux.

## Computational Studies

### 1.1 Computational Methods

Density functional theory (DFT)<sup>19</sup> calculations were performed using Gaussian 09 (revision E.01)<sup>20</sup> and the Gaussview<sup>21</sup> was used to generate input geometries and visualize output structures. Regarding geometry optimizations and frequency calculations for fluoroiodomethane and fluoroiodomethylithium, B3LYP functional<sup>22-25</sup> was used with the 6-311++G(d,p)+LANL2DZ (for I) mixed basis set.<sup>26</sup> For comparative purpose and to model solvation effect, the calculations were carried out in THF as a solvent, by applying the most commonly used integral equation formalism (IEF) version of polarized continuum model (PCM).<sup>27-28</sup> All stationary points were characterized as minima and thermal corrections were computed from unscaled frequencies, assuming a standard state of 298.15 K and 1 atm.

## 1.2 Structure optimization, bond lengths (Å) and measured bond angles (°)

| No. | Parameters           | FICH <sub>2</sub> – Gas Phase                                                     | FICHLi – Gas Phase                                                                | FICH <sub>2</sub> – THF                                                             | FICHLi – THF                                                                        |
|-----|----------------------|-----------------------------------------------------------------------------------|-----------------------------------------------------------------------------------|-------------------------------------------------------------------------------------|-------------------------------------------------------------------------------------|
| 1   | Optimized Structures | 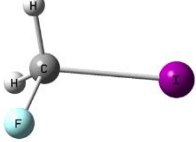 |  |  |  |
| 2   | Li–C (Å)             |                                                                                   | 1.98715                                                                           |                                                                                     | 2.09782                                                                             |
| 3   | Li–I (Å)             |                                                                                   | 2.54426                                                                           |                                                                                     | 3.32028                                                                             |
| 4   | Li–F (Å)             |                                                                                   | 2.93467                                                                           |                                                                                     | 3.03683                                                                             |
| 5   | C–I (Å)              | 2.18567                                                                           | 2.59734                                                                           | 2.18841                                                                             | 2.46282                                                                             |
| 6   | C–F (Å)              | 1.36730                                                                           | 1.35715                                                                           | 1.37357                                                                             | 1.39964                                                                             |
| 7   | C–H (Å)              | 1.08609                                                                           | 1.10041                                                                           | 1.08486                                                                             | 1.09889                                                                             |
| 8   | I–C–H (°)            | 106.62399                                                                         | 93.11711                                                                          | 106.73539                                                                           | 92.94860                                                                            |
| 9   | I–C–Li (°)           |                                                                                   | 65.85965                                                                          |                                                                                     | 93.09497                                                                            |
| 10  | C–Li–I (°)           |                                                                                   | 68.68303                                                                          |                                                                                     | 47.78852                                                                            |
| 11  | Li–I–C (°)           |                                                                                   | 45.45733                                                                          |                                                                                     | 39.11651                                                                            |
| 12  | F–C–Li (°)           |                                                                                   | 121.54336                                                                         |                                                                                     | 119.17297                                                                           |
| 13  | C–Li–F (°)           |                                                                                   | 23.21132                                                                          |                                                                                     | 23.72995                                                                            |
| 14  | Li–F–C (°)           |                                                                                   | 35.24533                                                                          |                                                                                     | 37.09708                                                                            |
| 15  | I–C–F (°)            | 110.85934                                                                         | 106.95985                                                                         | 110.20028                                                                           | 104.53787                                                                           |
| 16  | I–Li–F (°)           |                                                                                   | 72.69869                                                                          |                                                                                     | 58.65085                                                                            |

### 1.3 Electrostatic Potential Map

| No.                                           | Structure                     | Solid | Mesh | Transparent |
|-----------------------------------------------|-------------------------------|-------|------|-------------|
| 1                                             | FICH <sub>2</sub> – Gas Phase |       |      |             |
| 2                                             | FICH <sub>2</sub> – THF       |       |      |             |
| 3                                             | FICHLi – Gas Phase            |       |      |             |
| 4                                             | FICHLi – THF                  |       |      |             |
| Red: strong negative<br>Blue: strong positive |                               |       |      |             |

### 1.4 HOMO – LUMO Analysis

| No. | Structure                     | HOMO – LUMO Energy Gap                                                                                                                                                                                                                                             |
|-----|-------------------------------|--------------------------------------------------------------------------------------------------------------------------------------------------------------------------------------------------------------------------------------------------------------------|
| 1   | FICH <sub>2</sub> – Gas Phase | 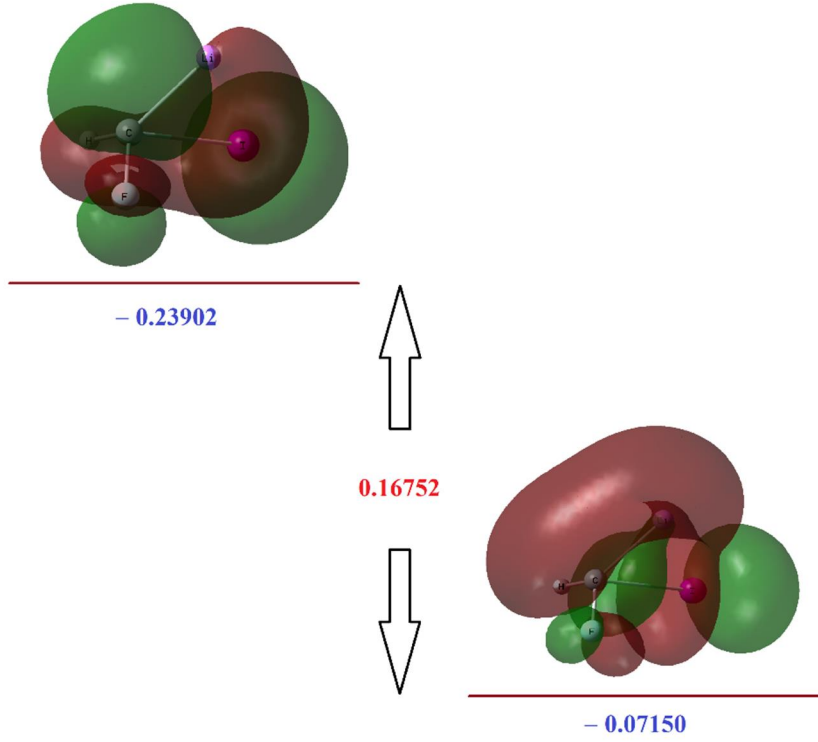 <p style="text-align: center;"> <span style="color: red;">- 0.23902</span><br/> <span style="color: red;">0.16752</span><br/> <span style="color: red;">- 0.07150</span> </p>  |
| 2   | FICH <sub>2</sub> – THF       |  <p style="text-align: center;"> <span style="color: red;">- 0.21464</span><br/> <span style="color: red;">0.17164</span><br/> <span style="color: red;">- 0.04300</span> </p> |

|   |                    |                                                                                                                                                                                                                                                                                                                                                                                                   |
|---|--------------------|---------------------------------------------------------------------------------------------------------------------------------------------------------------------------------------------------------------------------------------------------------------------------------------------------------------------------------------------------------------------------------------------------|
| 3 | FICHLi – Gas Phase | 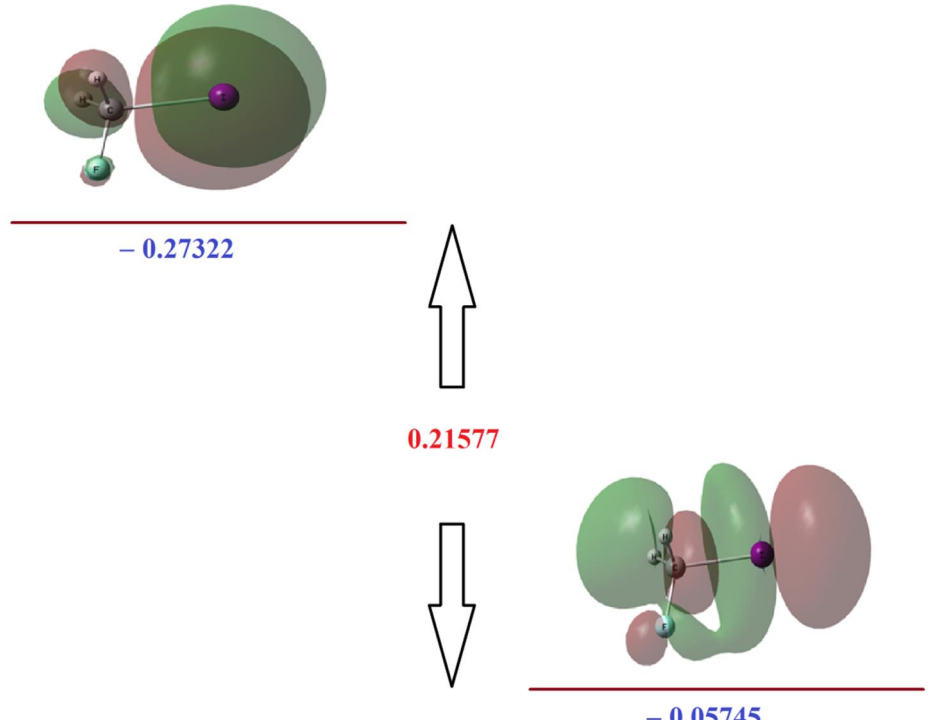 <p>Energy level diagram for FICHLi in the gas phase. The ground state energy is <math>-0.27322</math> eV. The excited state energy is <math>-0.05745</math> eV. The energy difference between the two states is <math>0.21577</math> eV. Molecular models with isosurface plots are shown for both states.</p> |
| 4 | FICHLi – THF       |  <p>Energy level diagram for FICHLi in THF. The ground state energy is <math>-0.27291</math> eV. The excited state energy is <math>-0.05311</math> eV. The energy difference between the two states is <math>0.2198</math> eV. Molecular models with isosurface plots are shown for both states.</p>           |

### 1.5 Natural and Mulliken Atomic Charges for FICH<sub>2</sub>

| Natural Atomic Charge |               |               | Mulliken Atomic Charge |               |
|-----------------------|---------------|---------------|------------------------|---------------|
| Atom                  | Gaseous Phase | THF (Solvent) | Gaseous Phase          | THF (Solvent) |
| <b>C</b>              | -0.07475      | -0.06871      | -0.394684              | -0.391620     |
| <b>H</b>              | 0.17727       | 0.18879       | 0.186500               | 0.207569      |
| <b>F</b>              | -0.37077      | -0.38313      | -0.080463              | -0.104348     |
| <b>I</b>              | 0.09098       | 0.07427       | 0.102147               | 0.080830      |
| <b>H</b>              | 0.17727       | 0.18879       | 0.186500               | 0.207569      |

### 1.6 Natural and Mulliken Atomic Charges for FICHLi

| Natural Atomic Charge |               |               | Mulliken Atomic Charge |               |
|-----------------------|---------------|---------------|------------------------|---------------|
| Atom                  | Gaseous Phase | THF (Solvent) | Gaseous Phase          | THF (Solvent) |
| <b>C</b>              | -0.16466      | -0.29347      | -0.310173              | -0.617807     |
| <b>H</b>              | 0.12388       | 0.11641       | 0.161749               | 0.175419      |
| <b>F</b>              | -0.37211      | -0.42592      | -0.025295              | -0.097187     |
| <b>I</b>              | -0.31412      | -0.32845      | -0.158408              | -0.298543     |
| <b>Li</b>             | 0.72701       | 0.93143       | 0.332127               | 0.838118      |

### 1.7 Computed Energies [values are in Hartree]

| No. | Species                      | Total Electronic Energy | Sum of Electronic and Zero-point Energies | Sum of Electronic and Thermal Enthalpies | Gibbs Free Energy |
|-----|------------------------------|-------------------------|-------------------------------------------|------------------------------------------|-------------------|
| 1   | FICH <sub>2</sub> – Gas Phas | -150.5679248            | -150.538204                               | -150.533635                              | -150.566043       |
| 2   | FICH <sub>2</sub> – THF      | -150.5715945            | -150.541926                               | -150.537344                              | -150.569778       |
| 3   | FICHLi – Gas Phase           | -157.4956551            | -157.477551                               | -157.471563                              | -157.507425       |
| 4   | FICHLi – THF                 | -157.5336842            | -157.516485                               | -157.510176                              | -157.546843       |



## 1.8 Optimized Structures and Cartesian Coordinates

| No.                   | Species                             | Optimized Structure                                                                  |
|-----------------------|-------------------------------------|--------------------------------------------------------------------------------------|
| 1                     | FICH <sub>2</sub> – Gas Phas        | 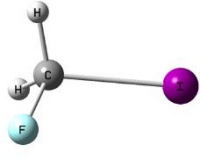   |
| Cartesian Coordinates |                                     |                                                                                      |
| C                     | 0.52745600 -1.50045000 0.00000000   |                                                                                      |
| H                     | 1.09500400 -1.67949700 0.90852500   |                                                                                      |
| F                     | -0.59497200 -2.28125700 0.00000000  |                                                                                      |
| I                     | 0.00000000 0.62062300 0.00000000    |                                                                                      |
| H                     | 1.09500400 -1.67949700 -0.90852500  |                                                                                      |
| 2                     | FICH <sub>2</sub> – THF             |   |
| Cartesian Coordinates |                                     |                                                                                      |
| C                     | 0.53432300 -1.50202800 0.00000000   |                                                                                      |
| H                     | 1.09675600 -1.68255600 0.90994800   |                                                                                      |
| F                     | -0.59993900 -2.27671300 0.00000000  |                                                                                      |
| I                     | 0.00000000 0.62014500 0.00000000    |                                                                                      |
| H                     | 1.09675600 -1.68255600 -0.90994800  |                                                                                      |
| 3                     | FICHLi – Gas Phase                  |  |
| Cartesian Coordinates |                                     |                                                                                      |
| C                     | 1.80553100 0.39081400 0.44497600    |                                                                                      |
| H                     | 1.76508600 -0.04310600 1.45541000   |                                                                                      |
| F                     | 2.50843400 -0.50721700 -0.29077000  |                                                                                      |
| I                     | -0.71146600 -0.06526300 -0.00544200 |                                                                                      |

|                       |              |                                                                                    |             |
|-----------------------|--------------|------------------------------------------------------------------------------------|-------------|
| Li                    | 0.84450100   | 1.90736400                                                                         | -0.40664400 |
| 4                     | FICHLi – THF | 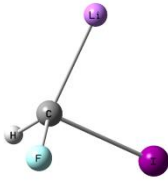 |             |
| Cartesian Coordinates |              |                                                                                    |             |
| C                     | 1.68705600   | 0.29369600                                                                         | 0.44219600  |
| H                     | 1.60703400   | -0.11129000                                                                        | 1.46059700  |
| F                     | 2.32173900   | -0.73506800                                                                        | -0.26336900 |
| I                     | -0.71125700  | -0.03278000                                                                        | -0.01278400 |
| Li                    | 1.69052700   | 2.23401700                                                                         | -0.35529900 |

**8. Copies of NMR Spectra ( $^1\text{H}$ ,  $^{13}\text{C}$  and  $^{19}\text{F}$ ) for All the Synthesized Compounds**

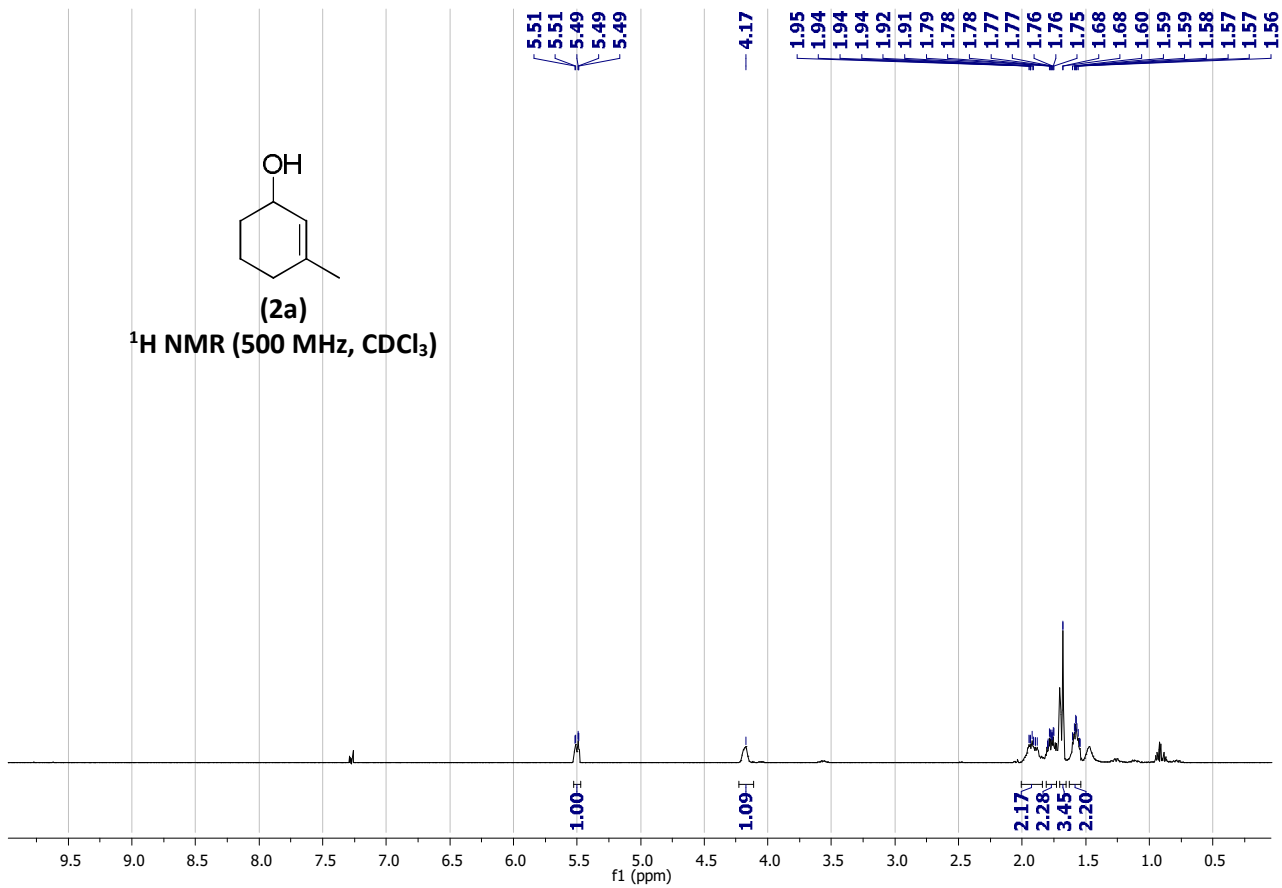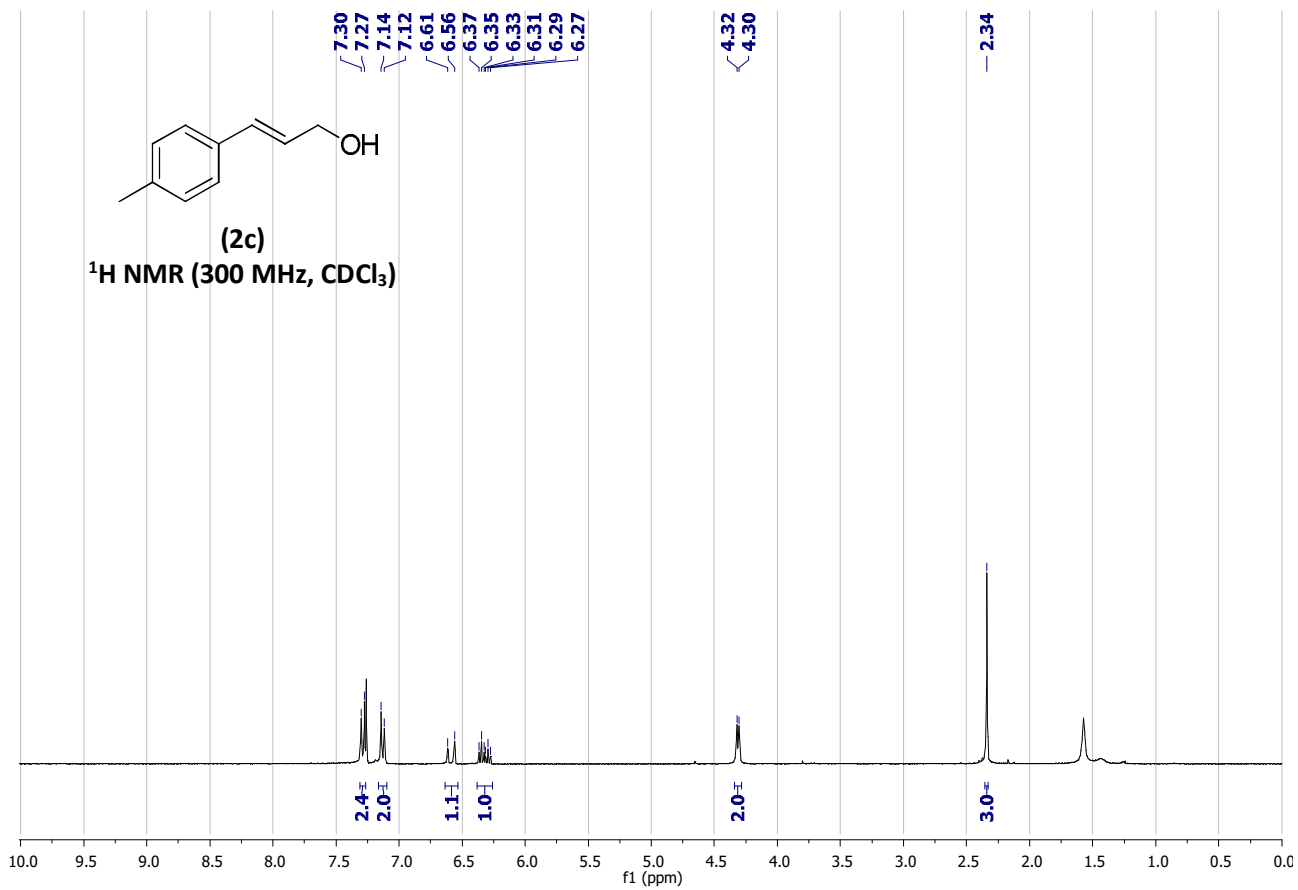

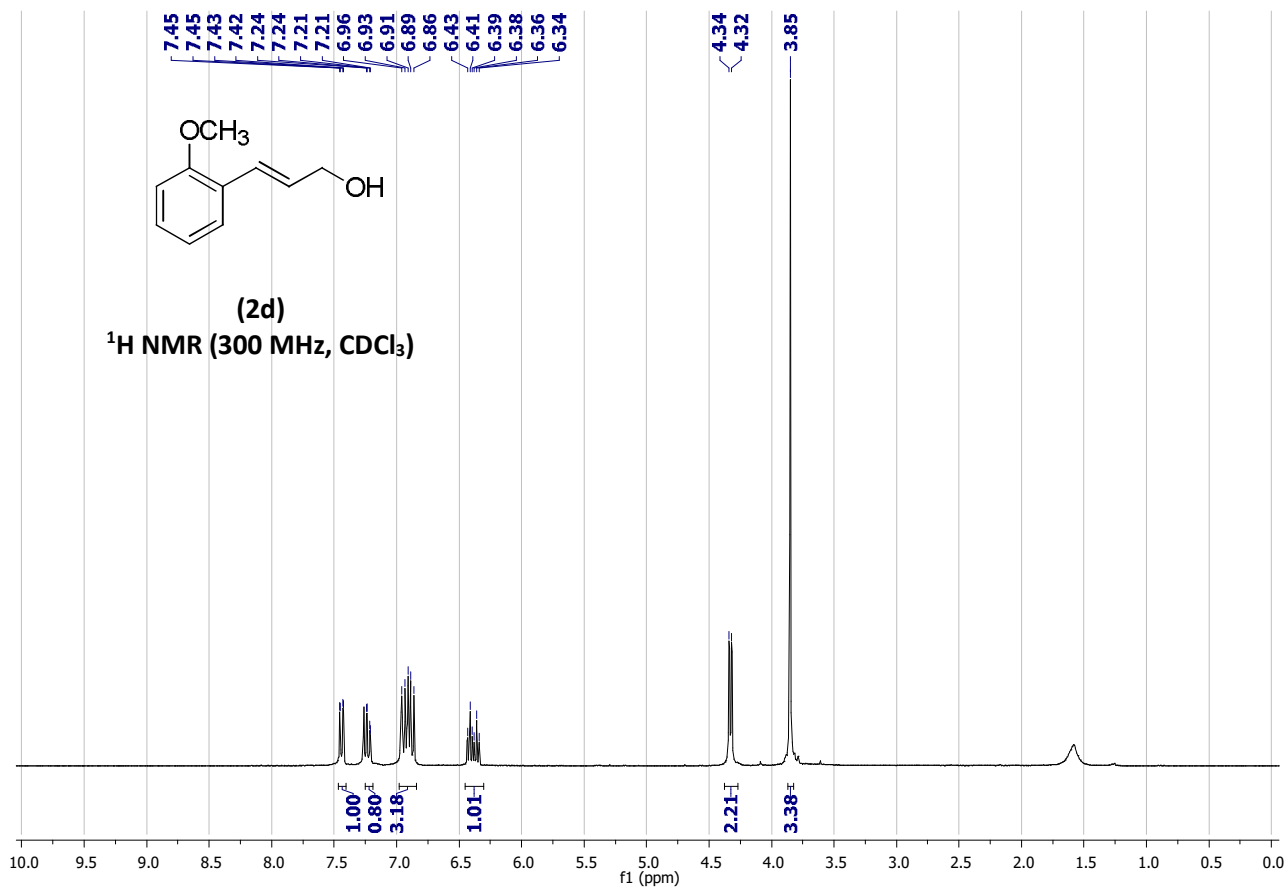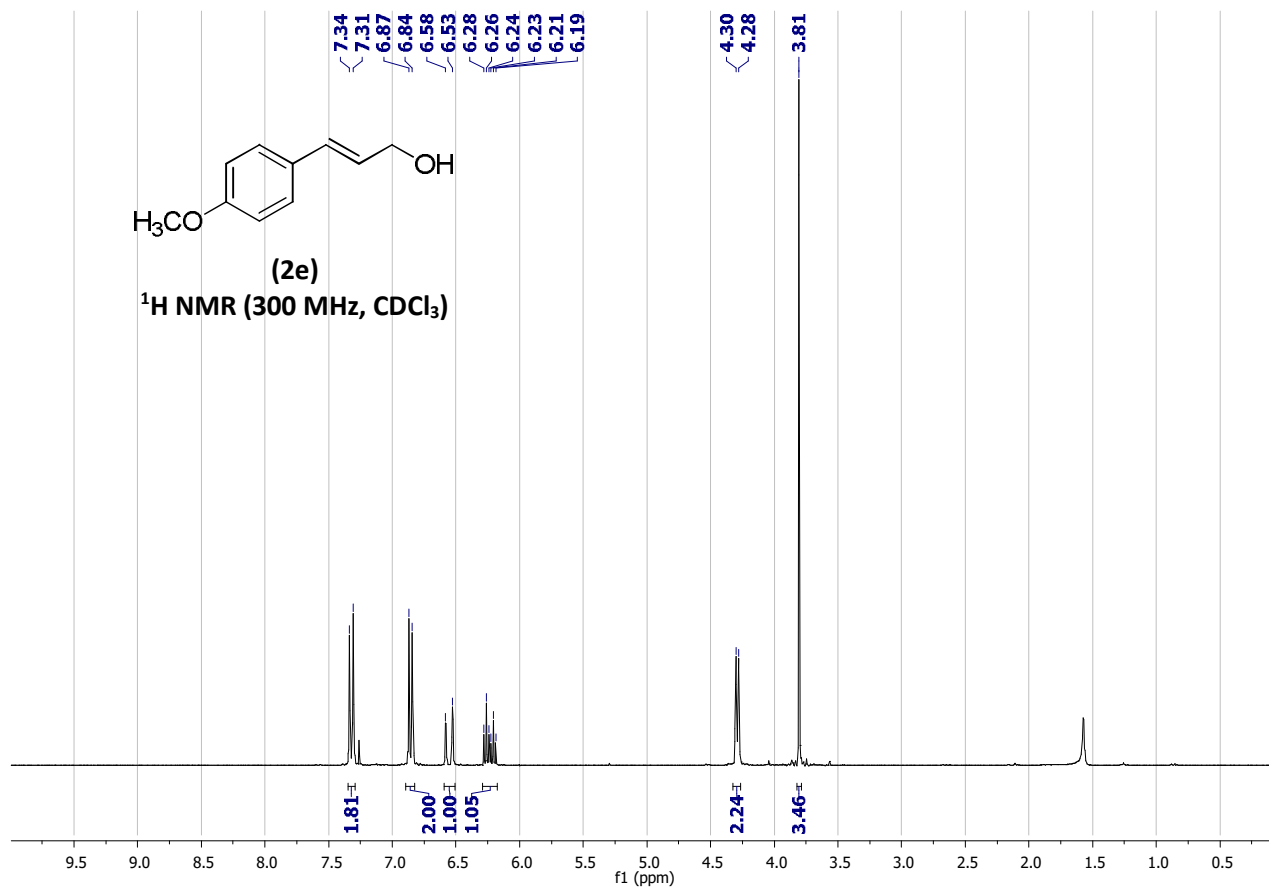

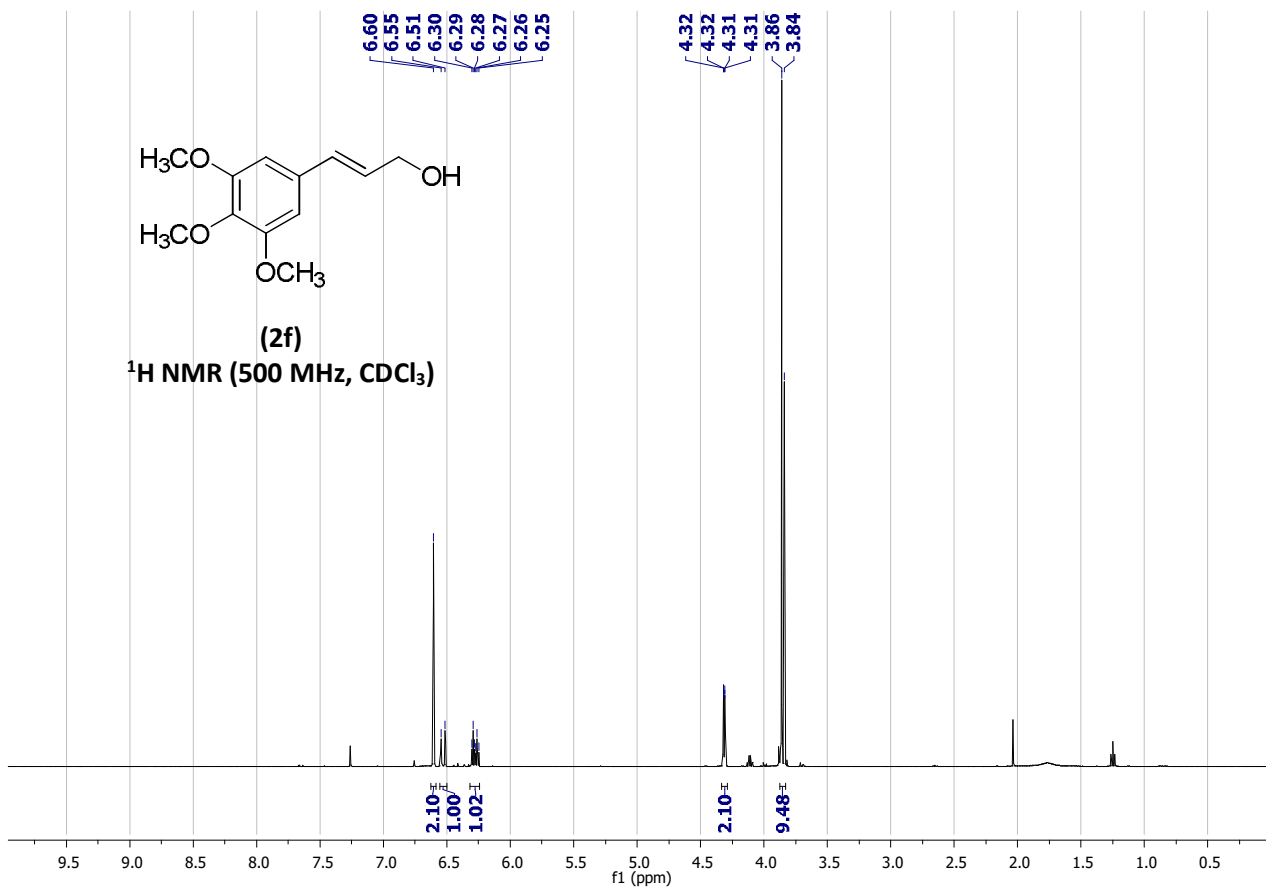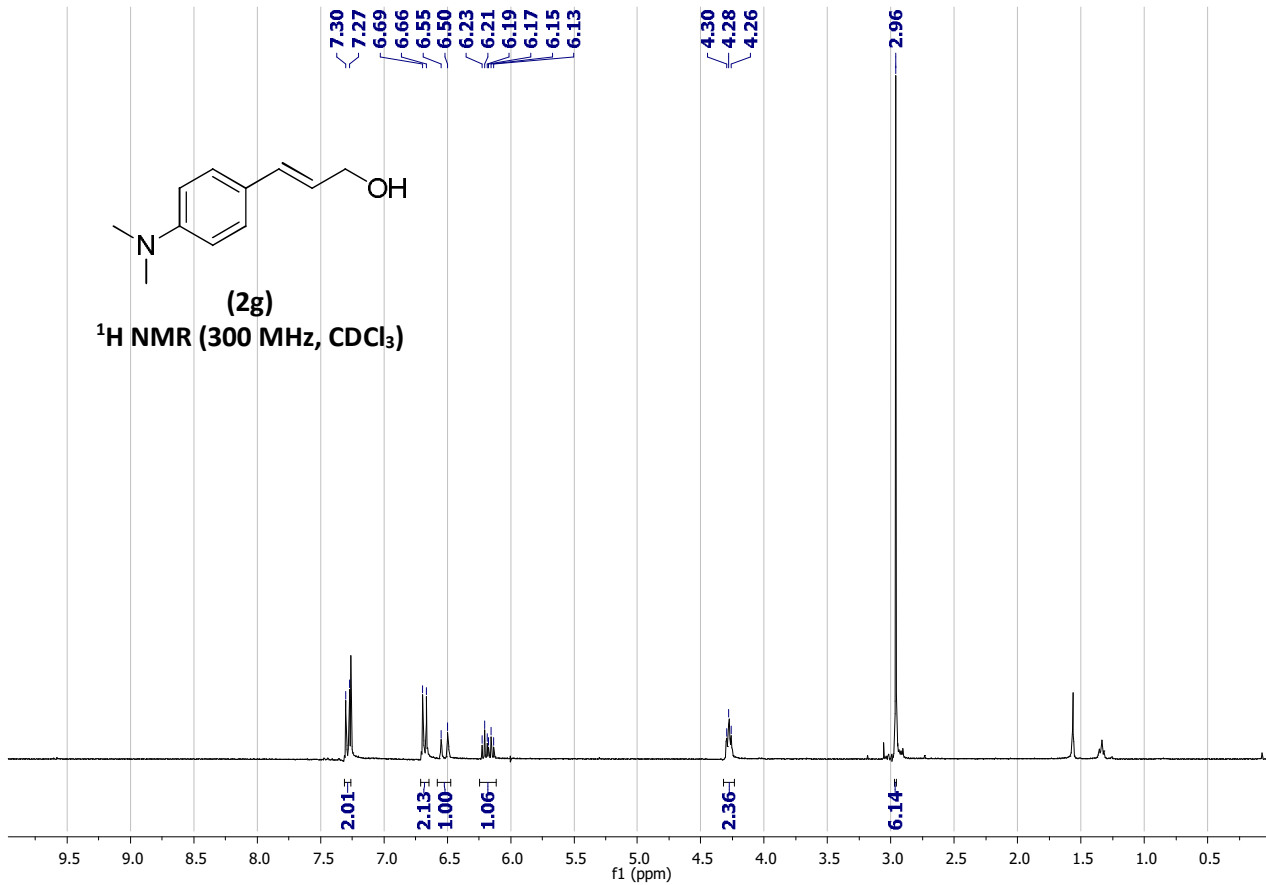

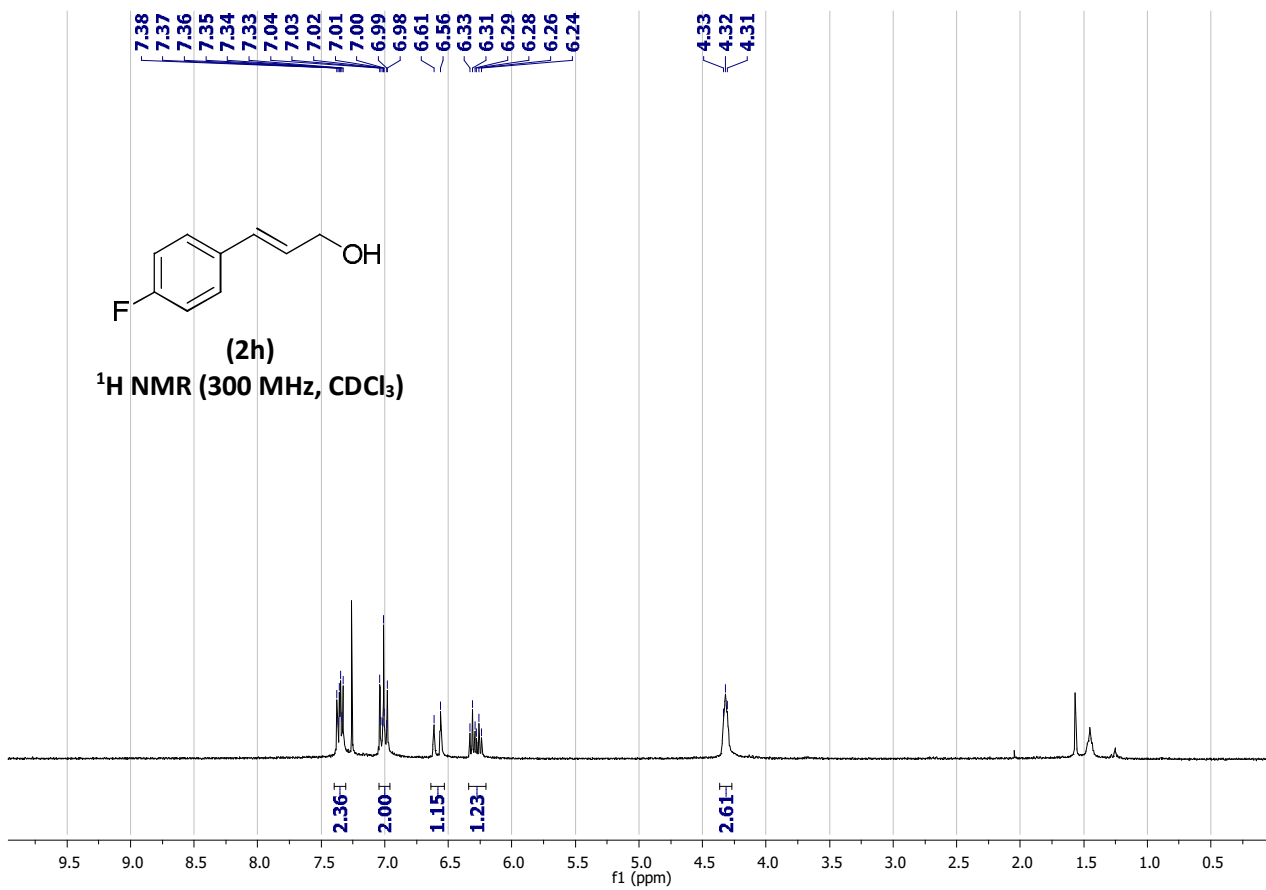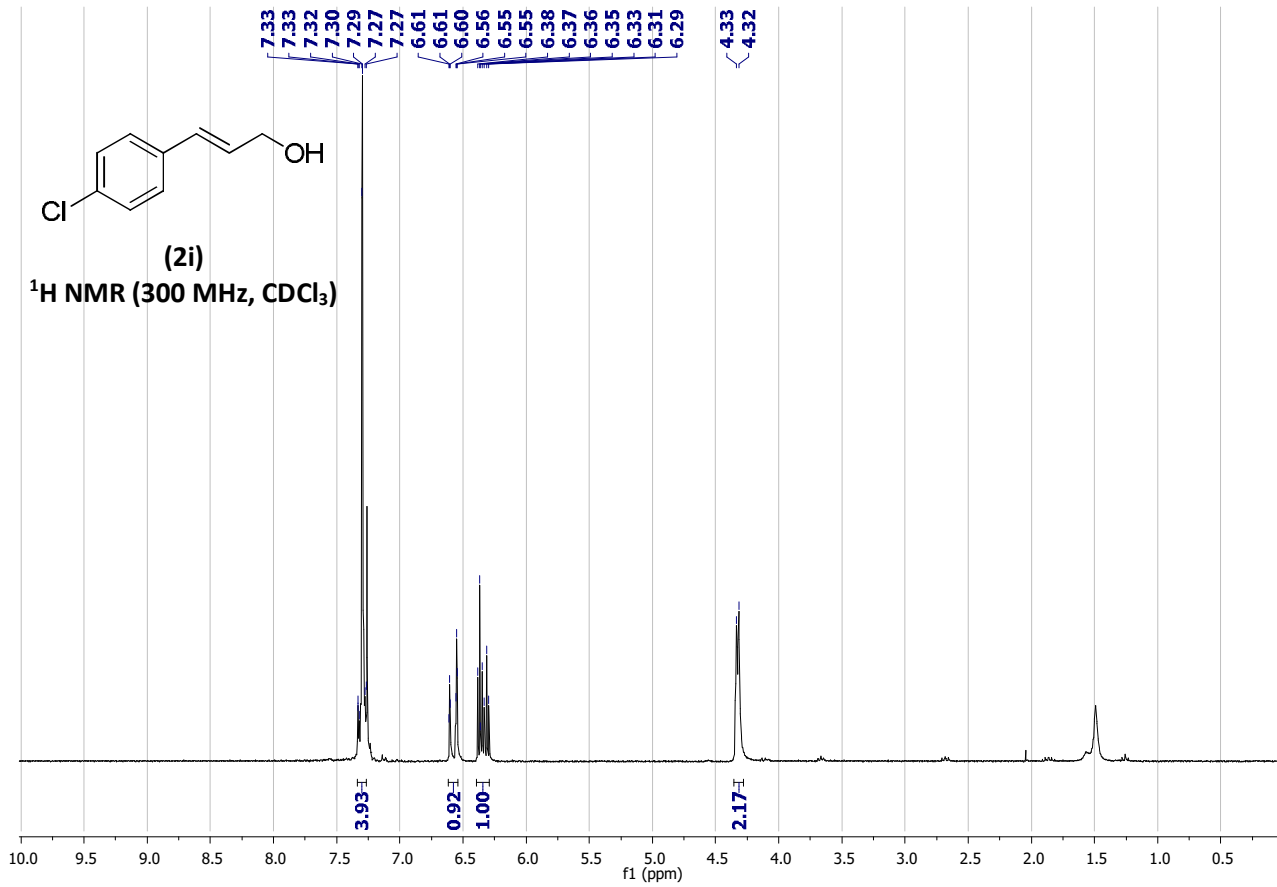

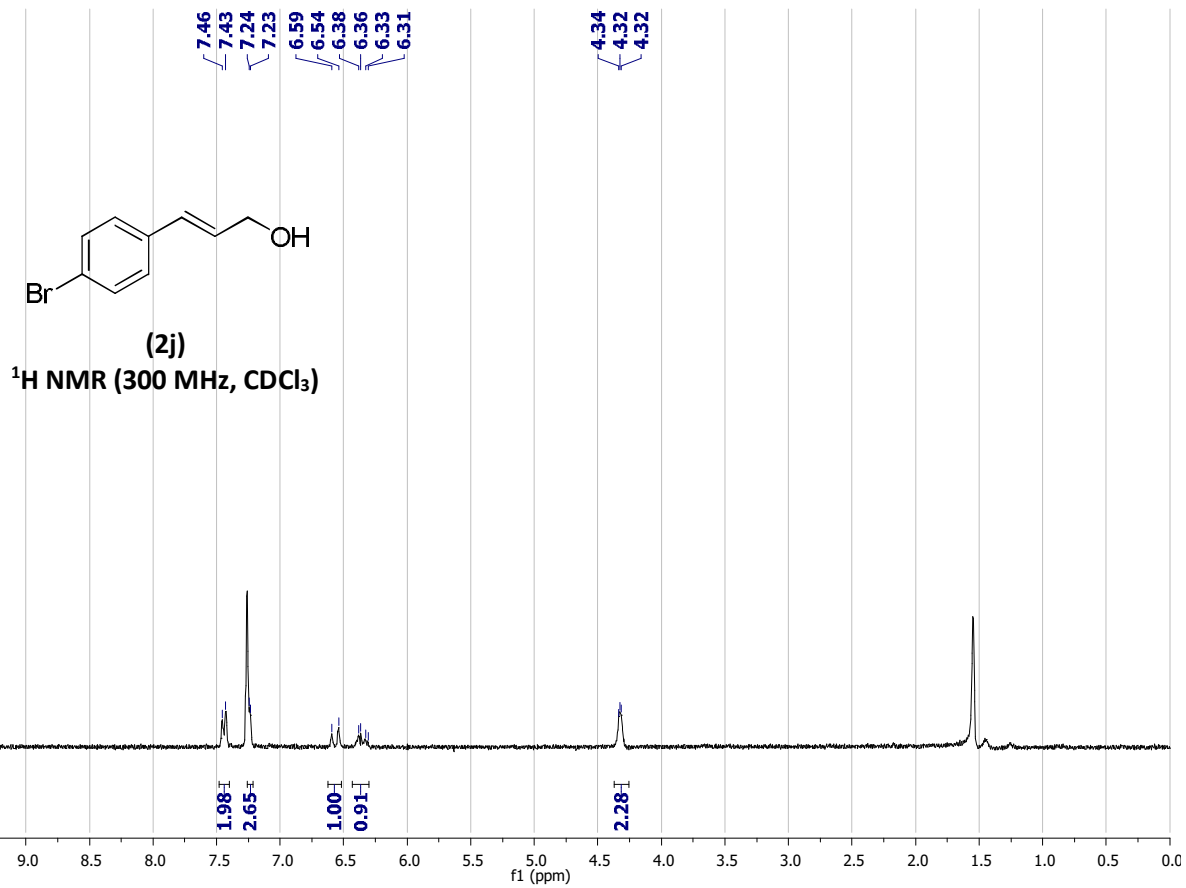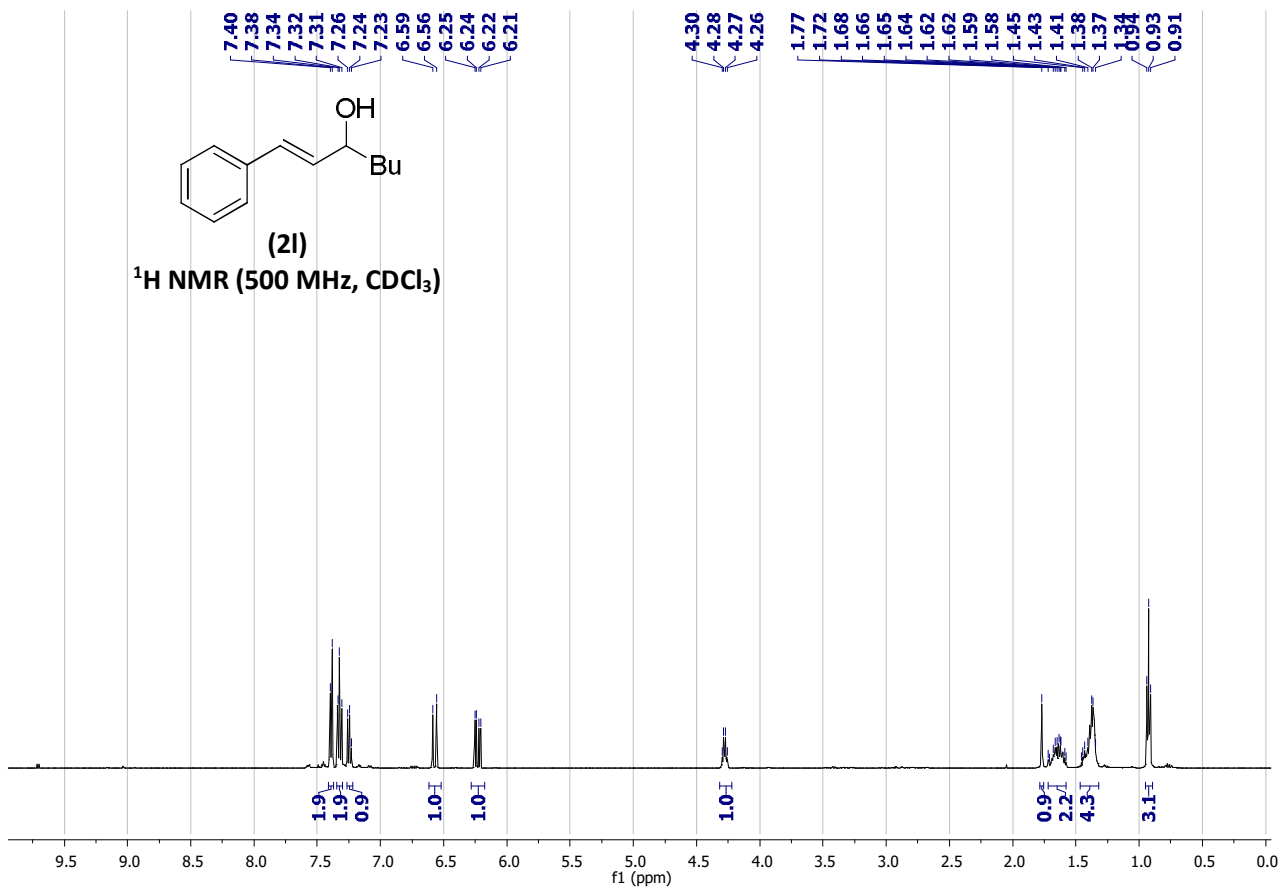



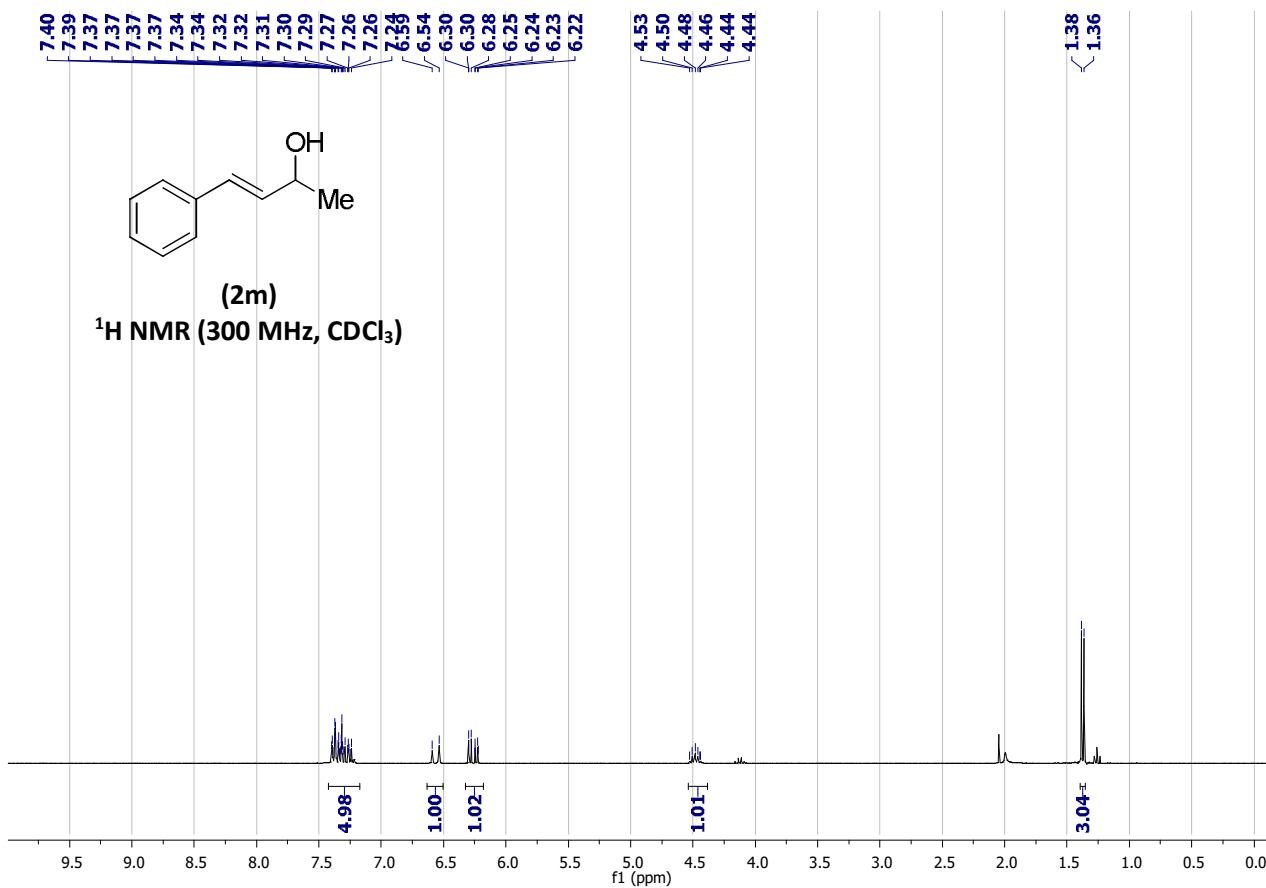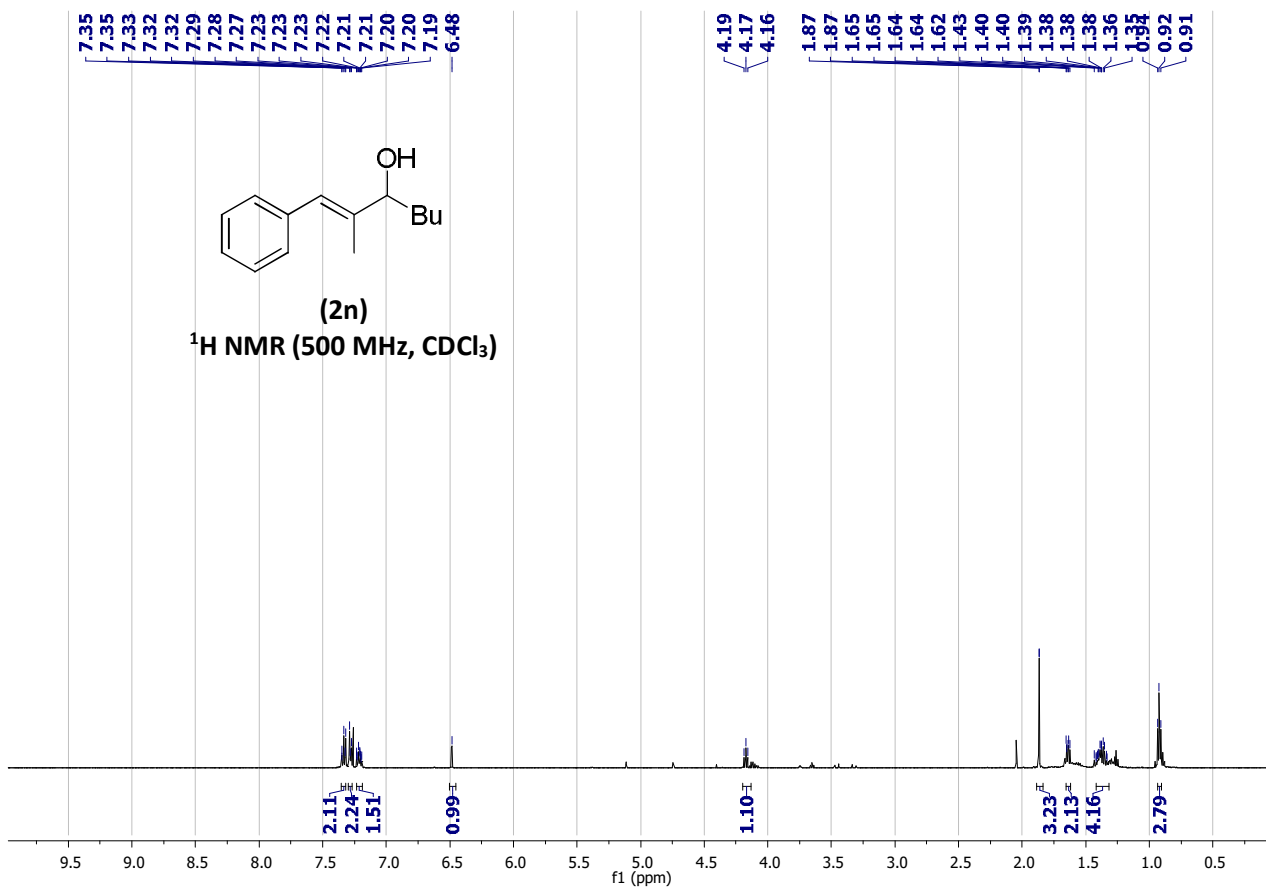

CCCC1=C(C)CCCC1O  
**(2o)**  
<sup>1</sup>H NMR (500 MHz, CDCl<sub>3</sub>)

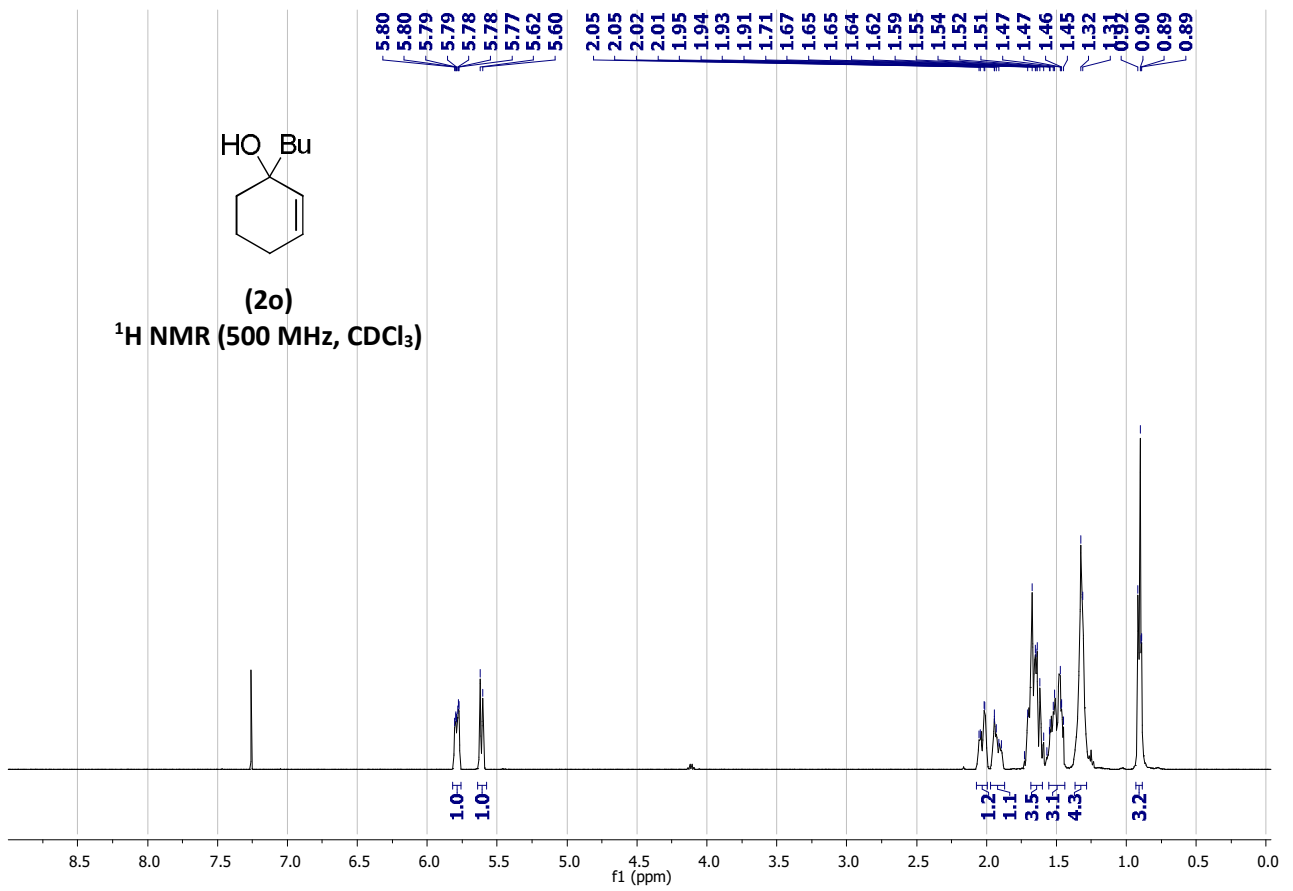

CCCCCCCC/C=C/CO  
**(2r)**  
<sup>1</sup>H NMR (500 MHz, CDCl<sub>3</sub>)

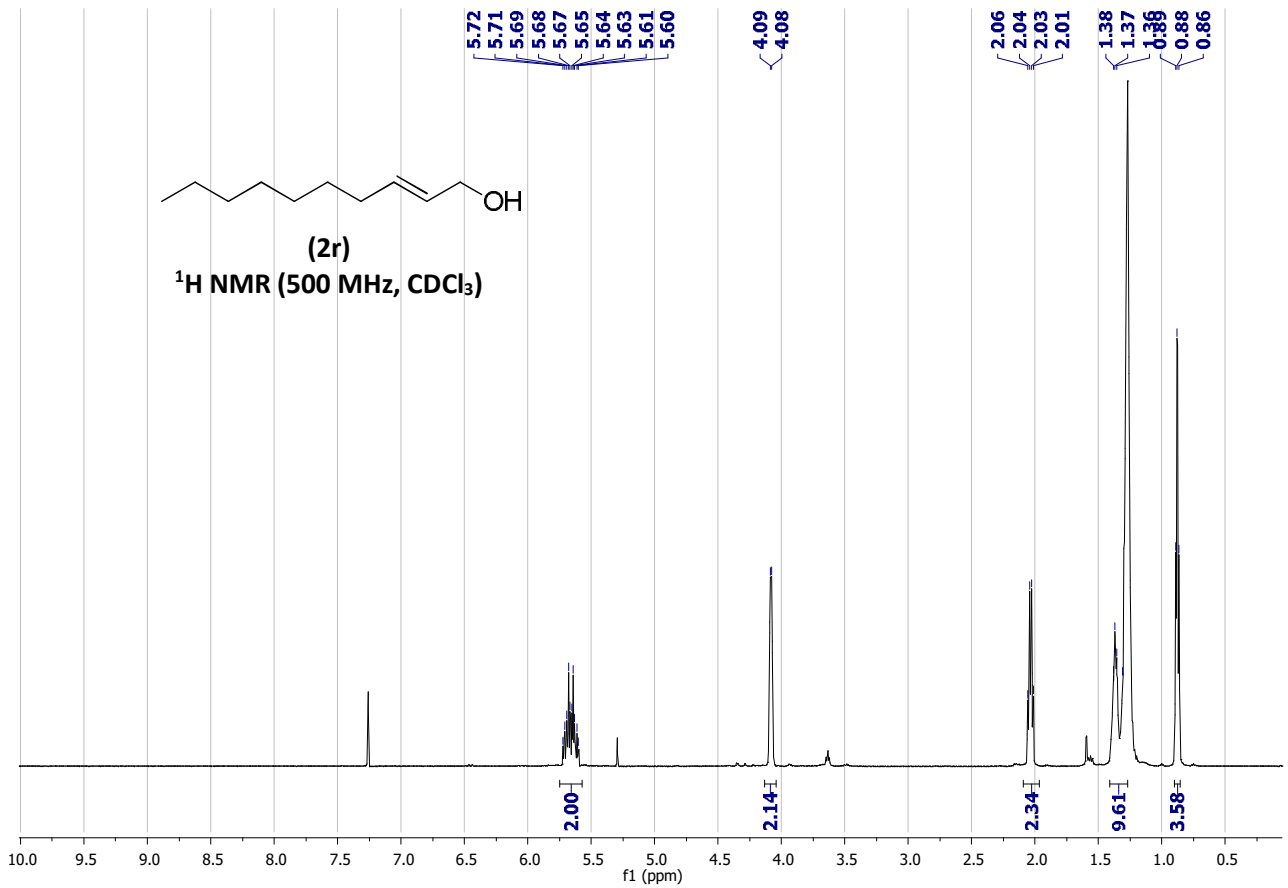

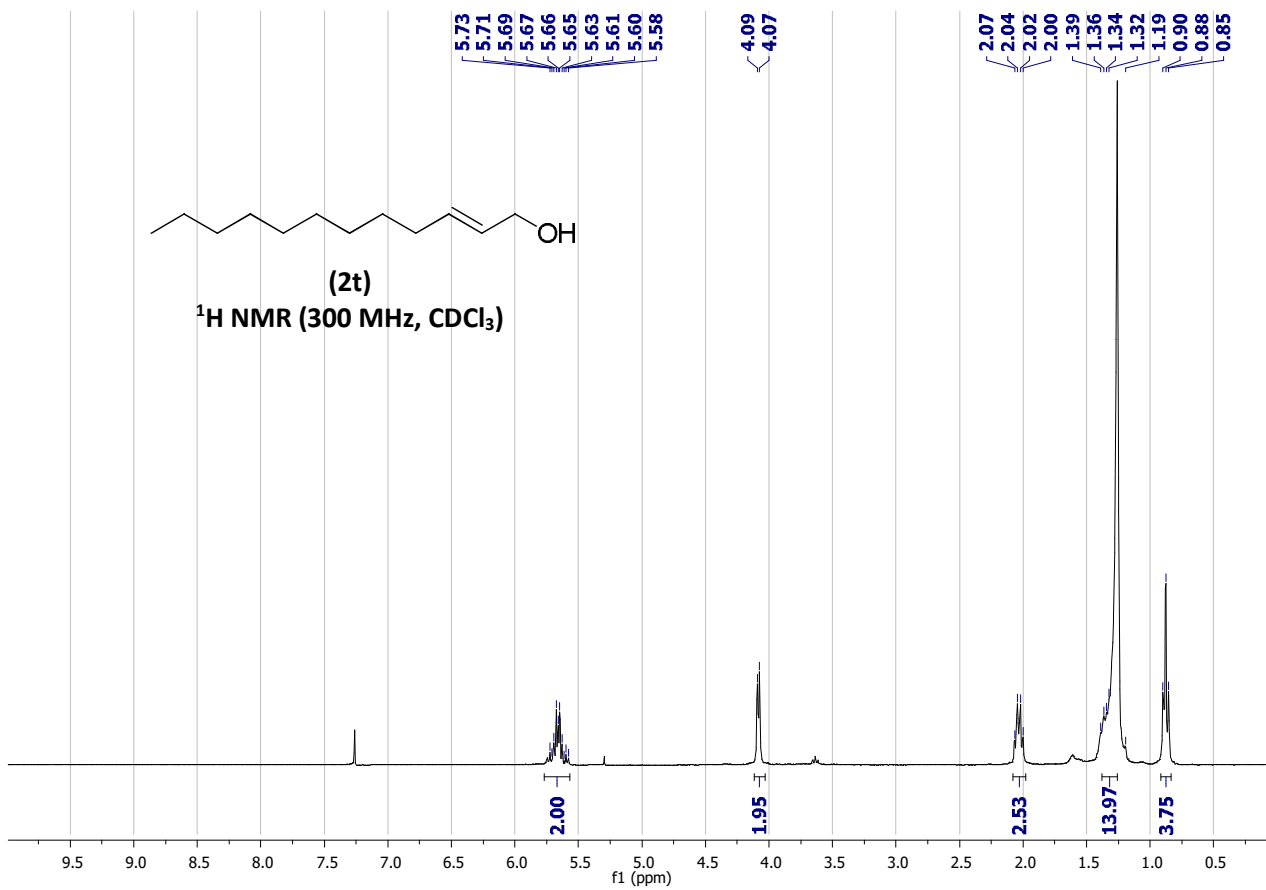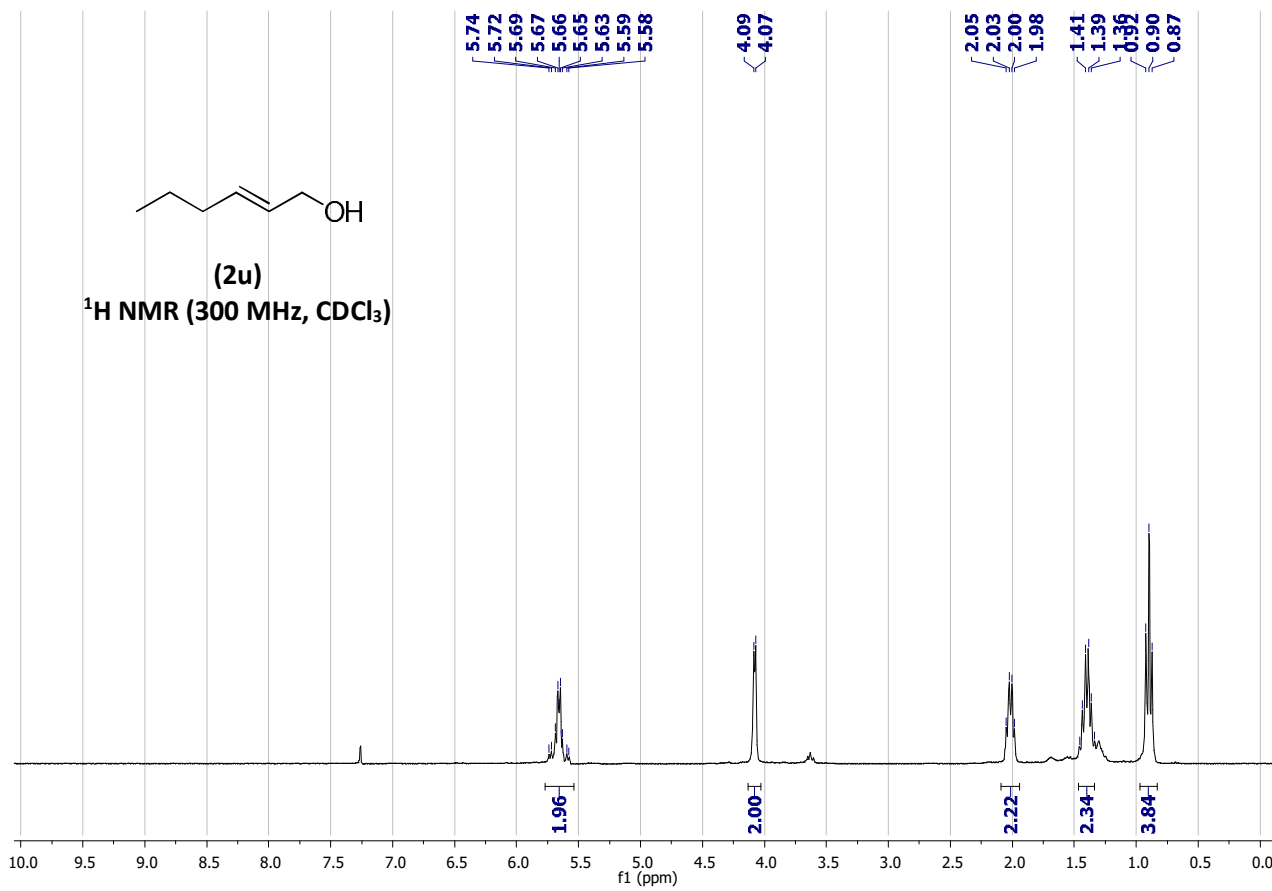

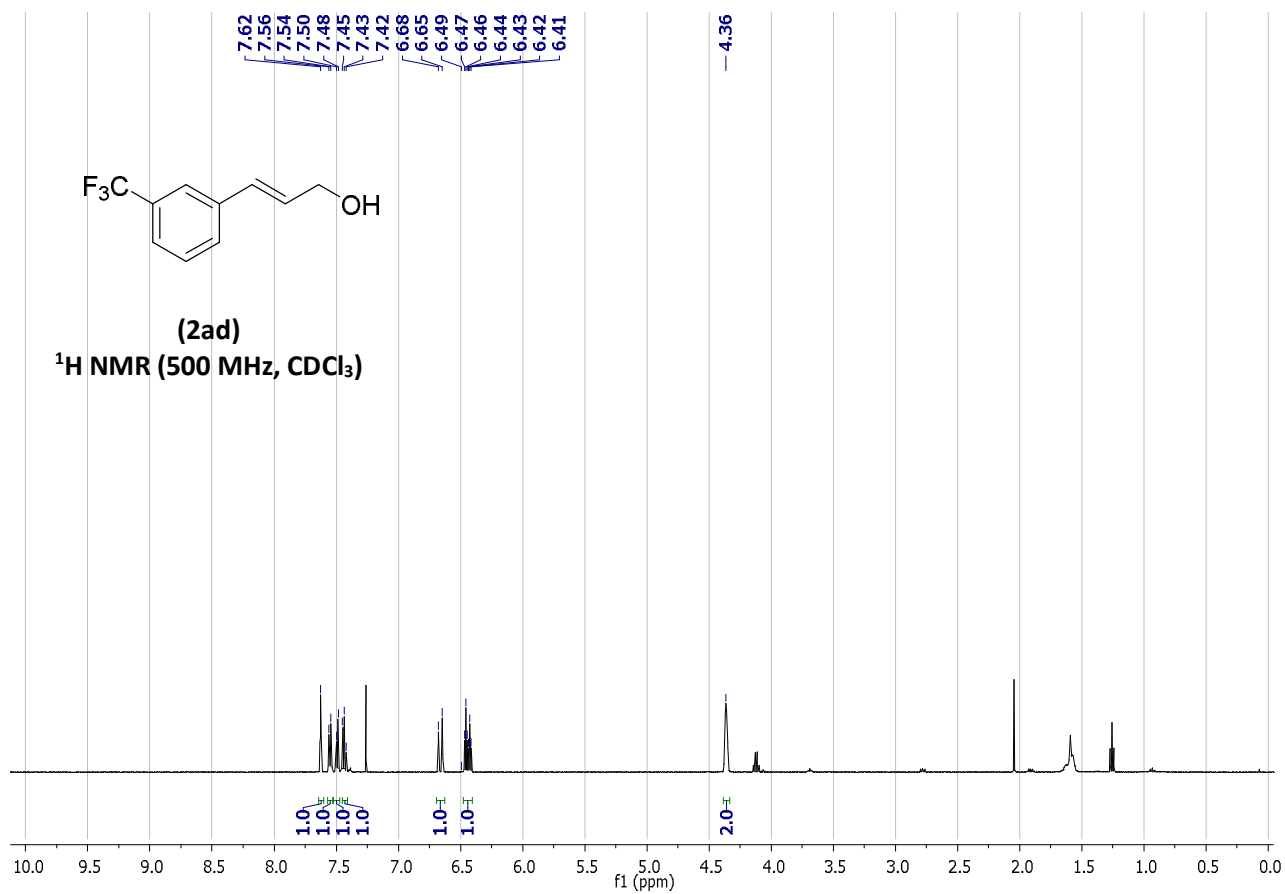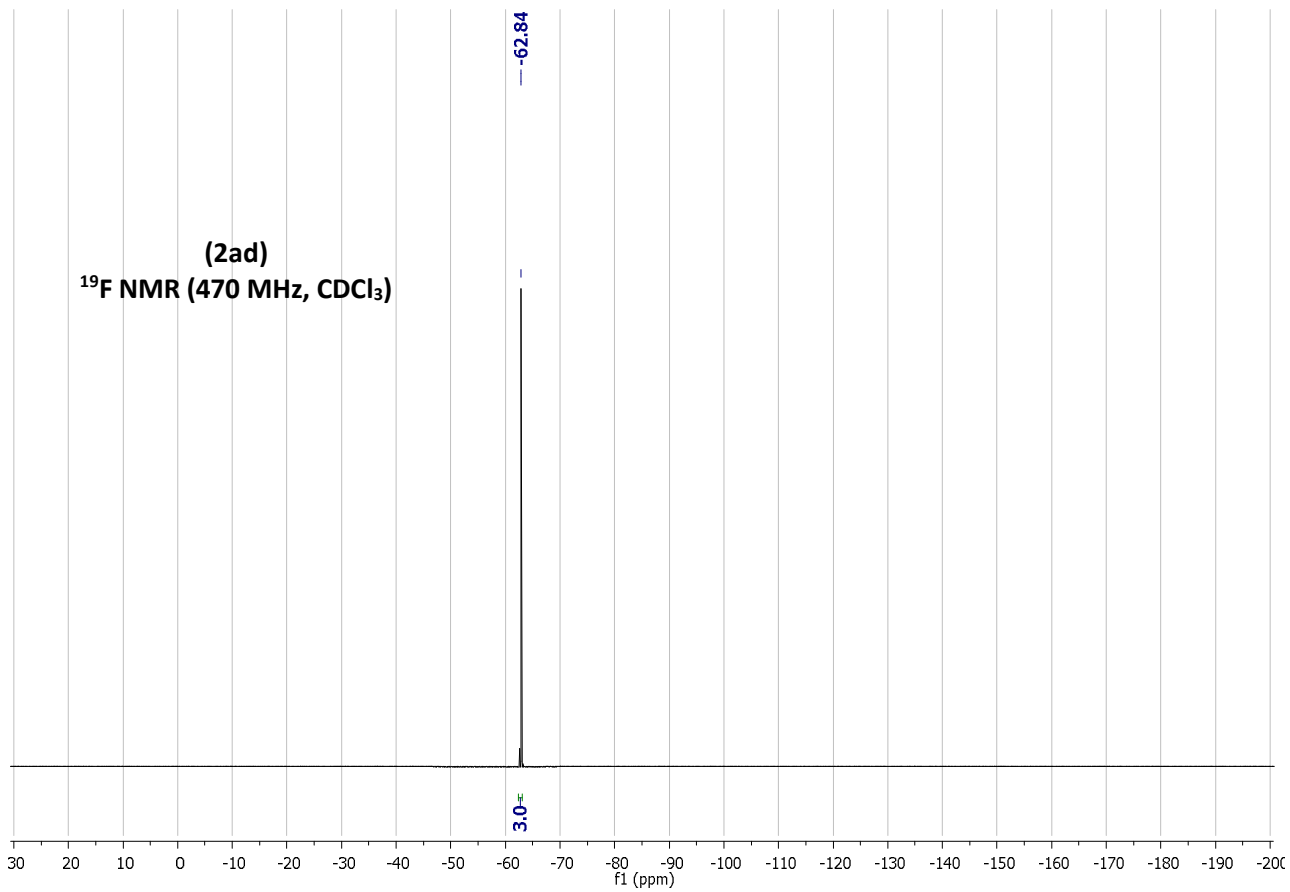

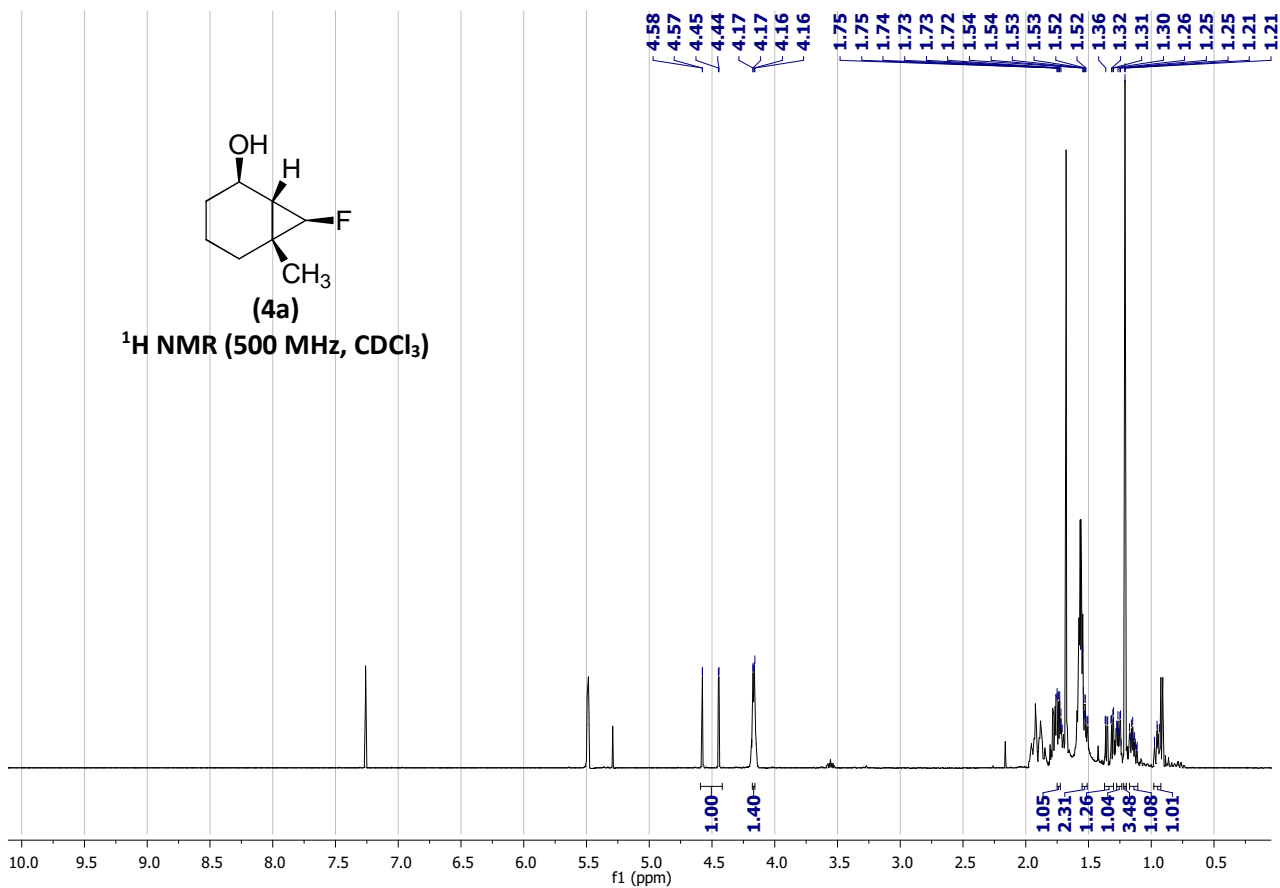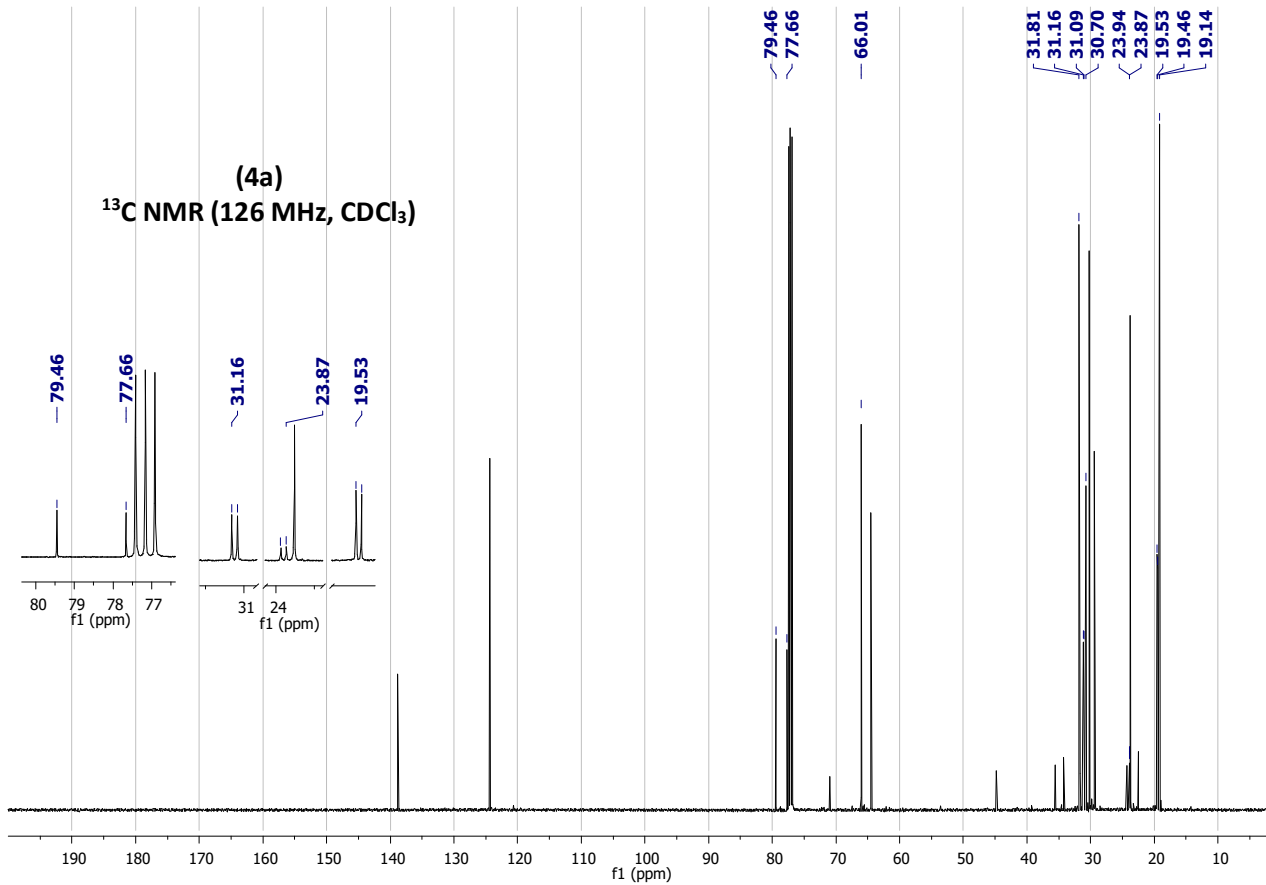

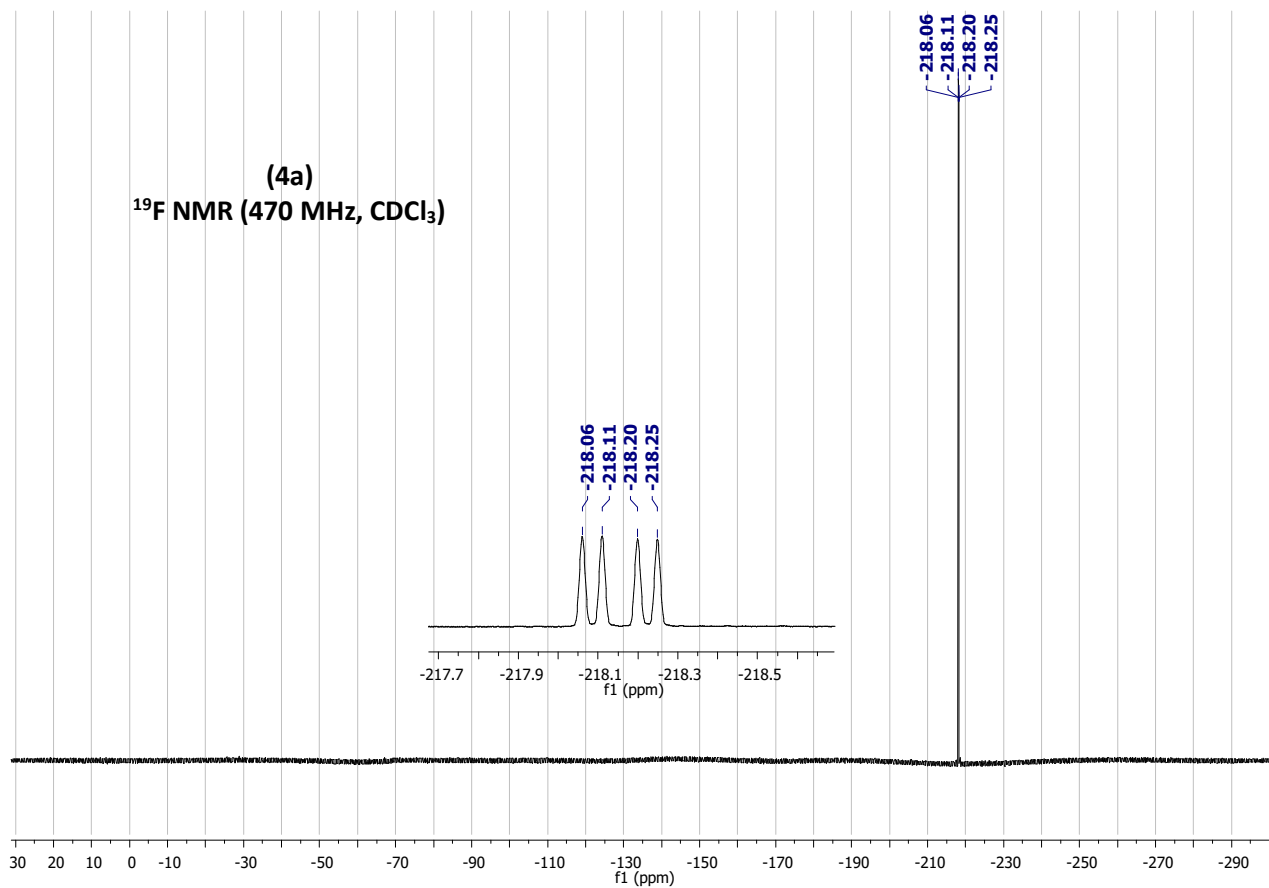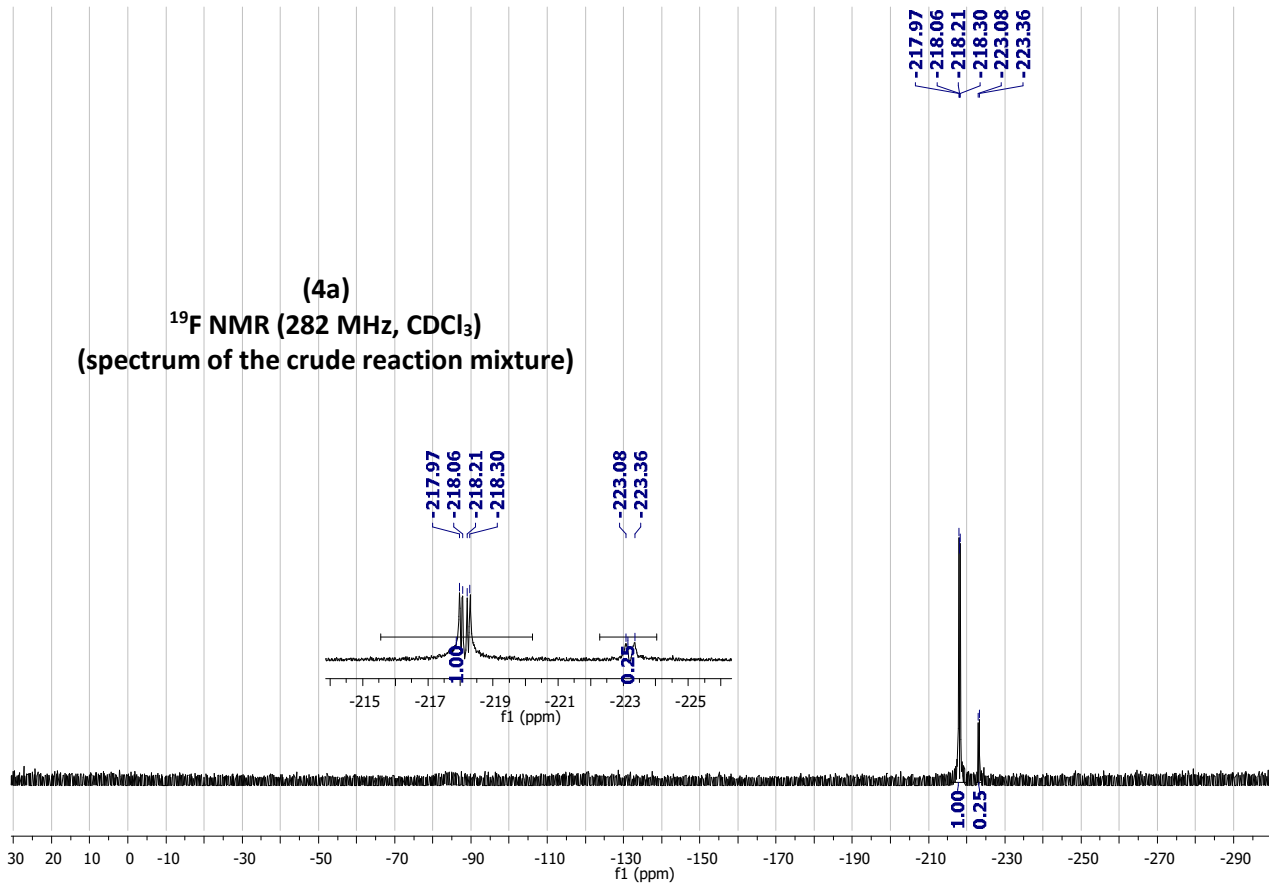

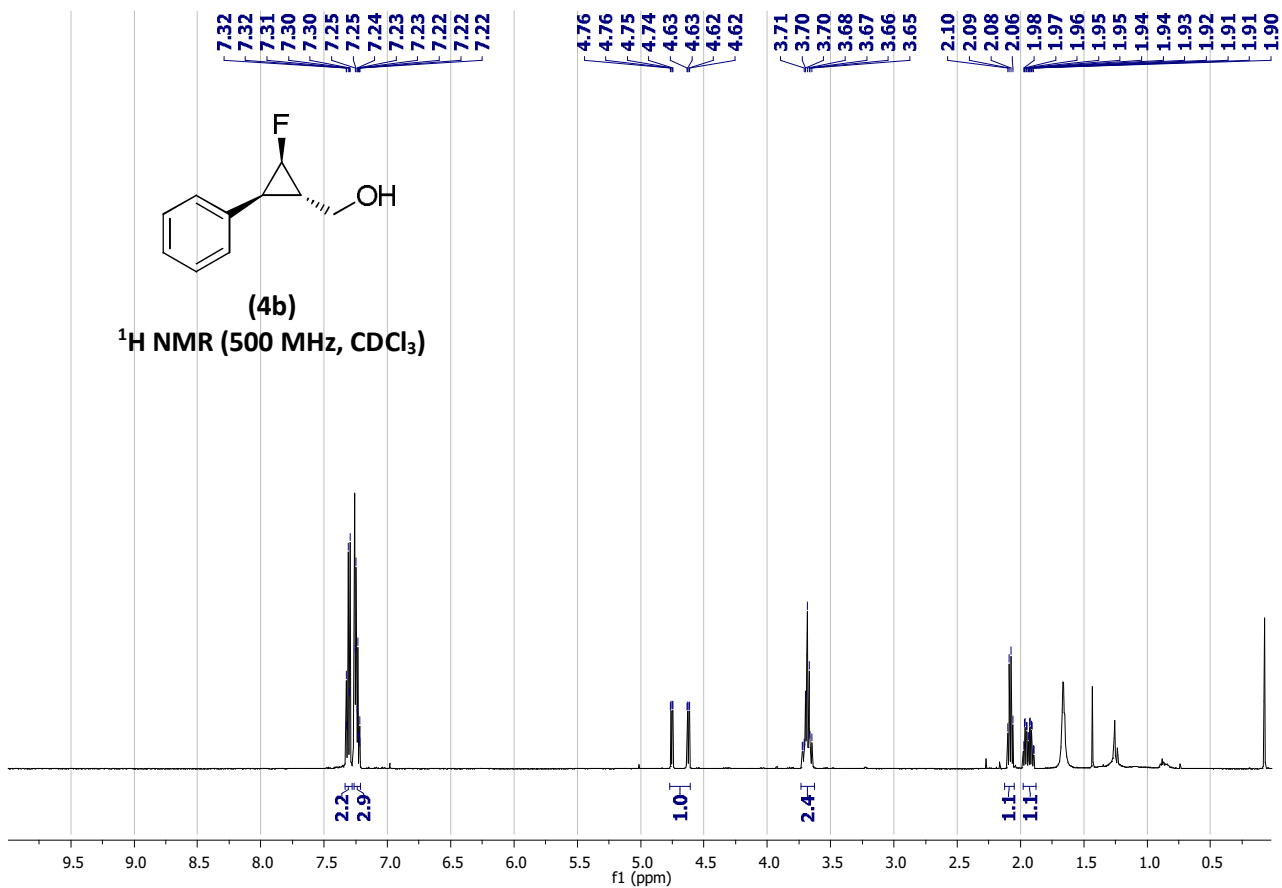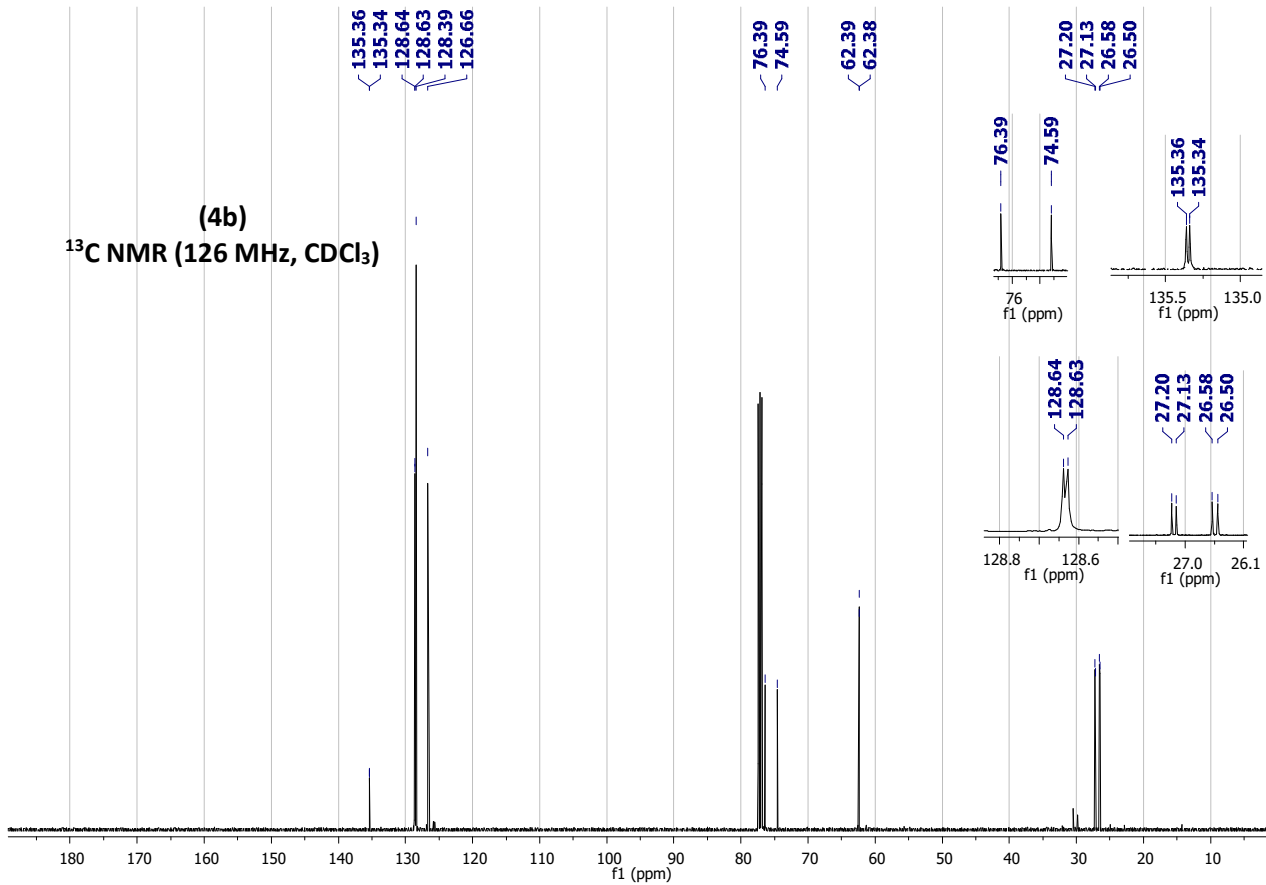

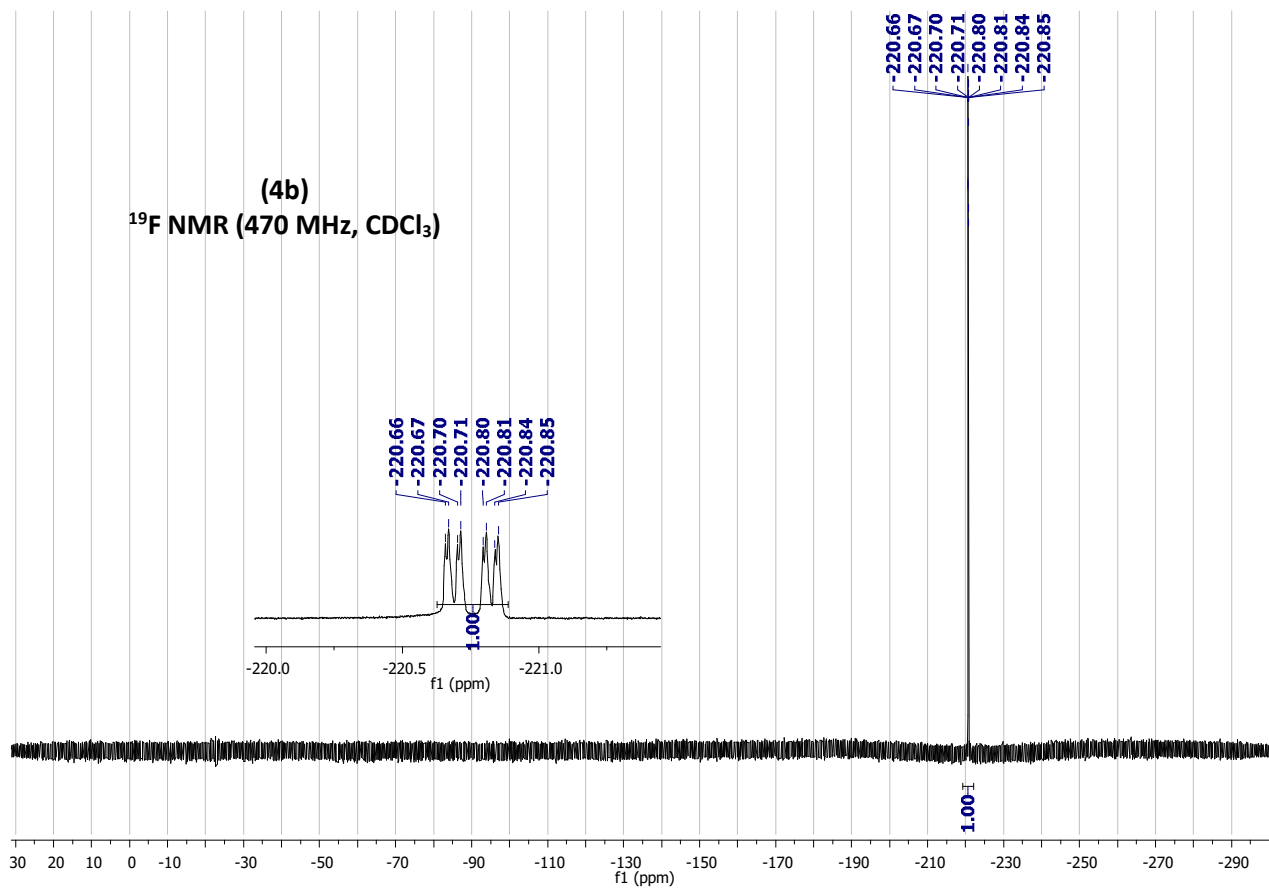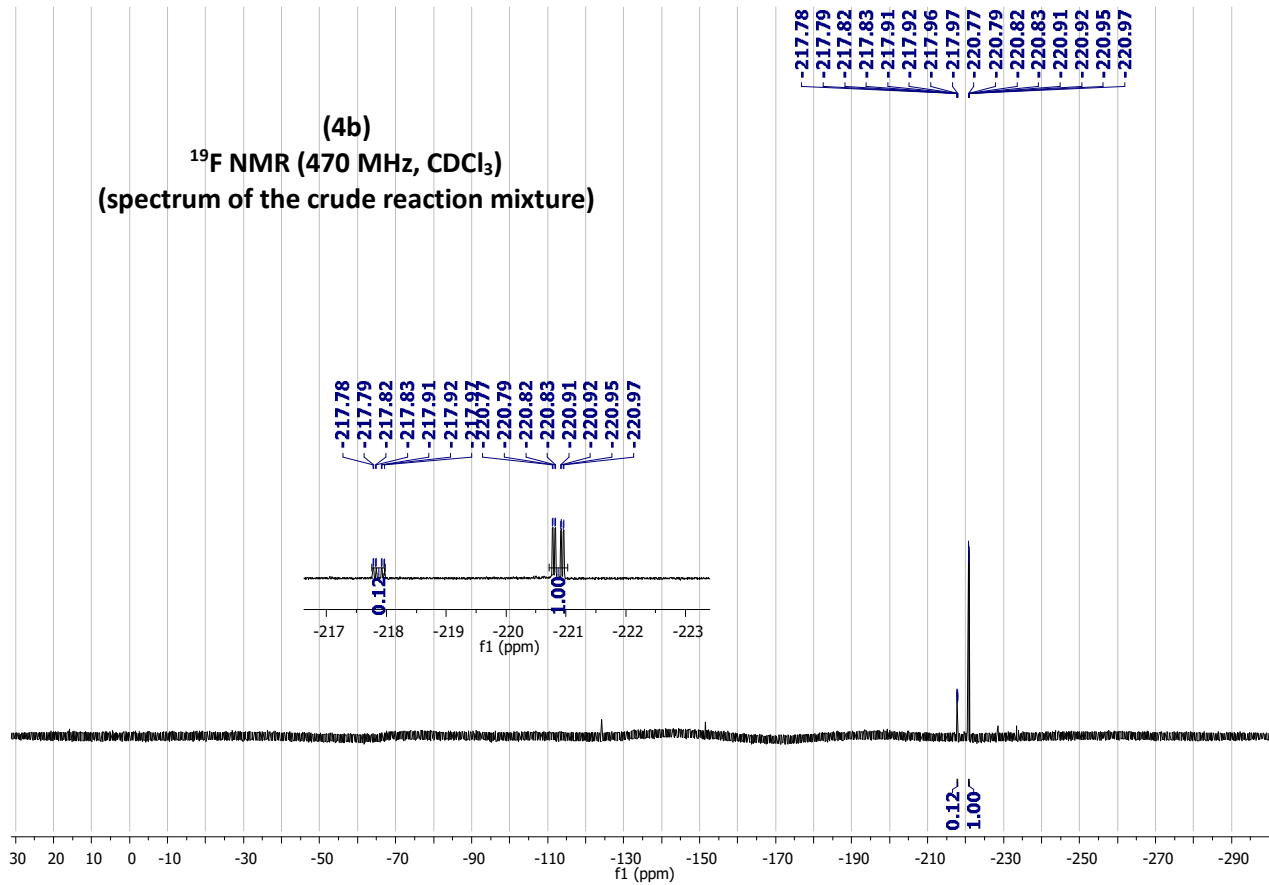



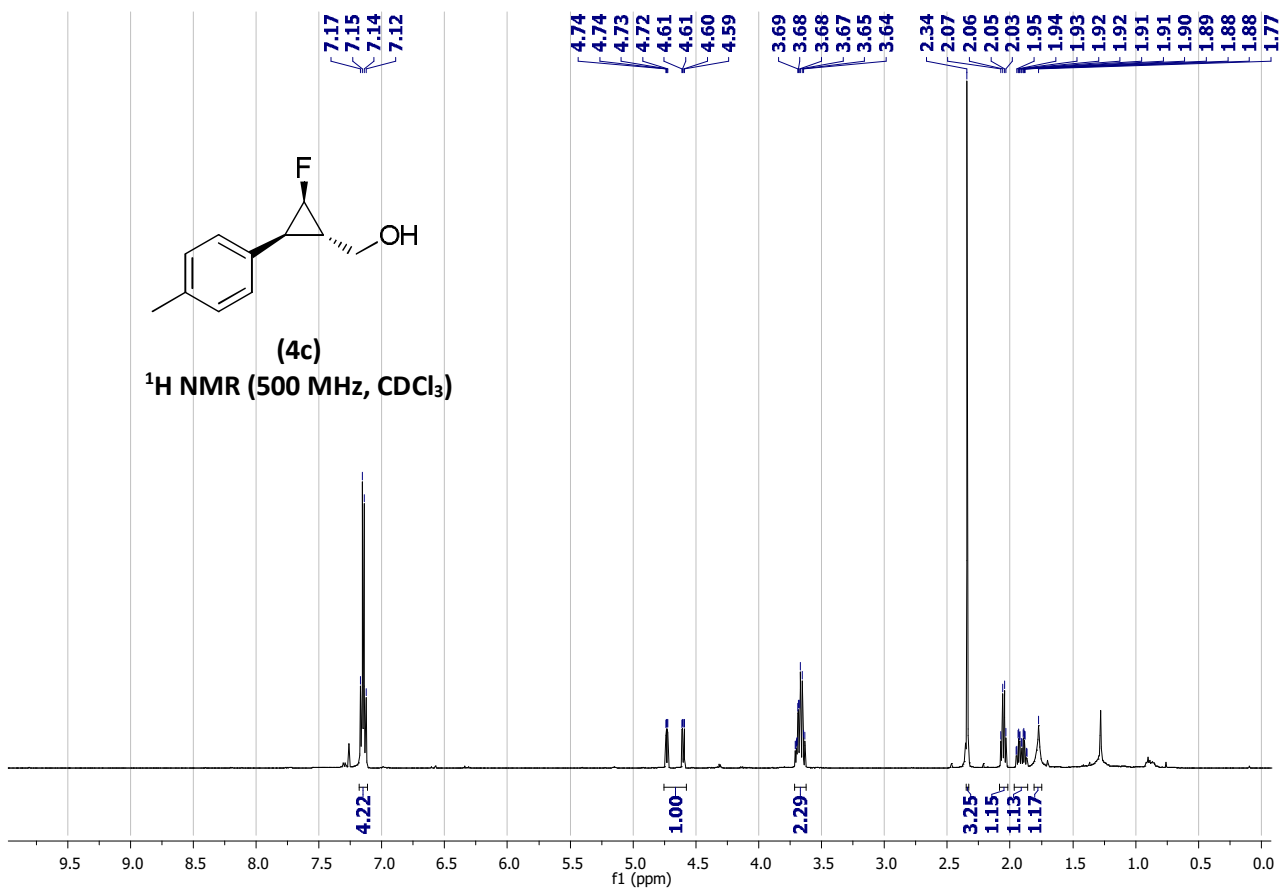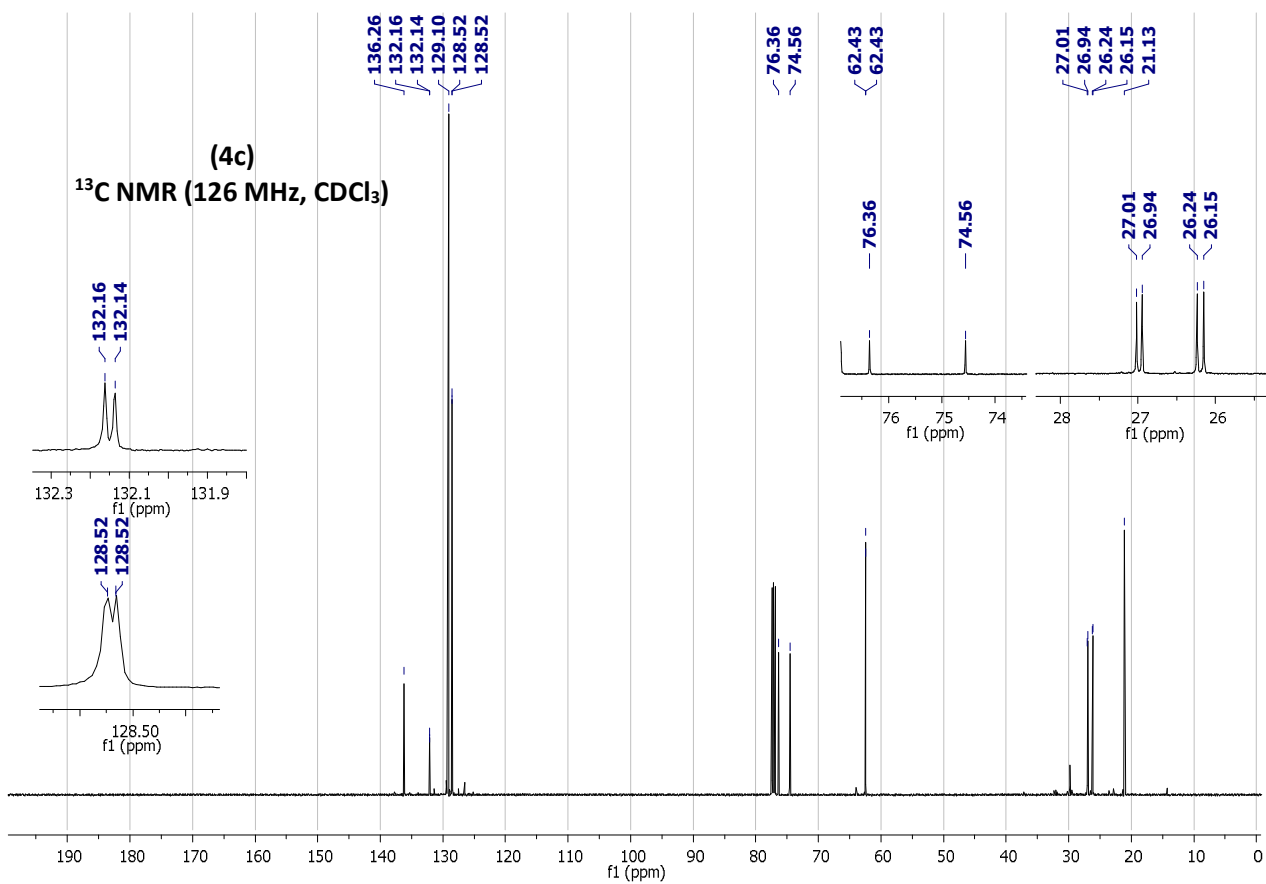

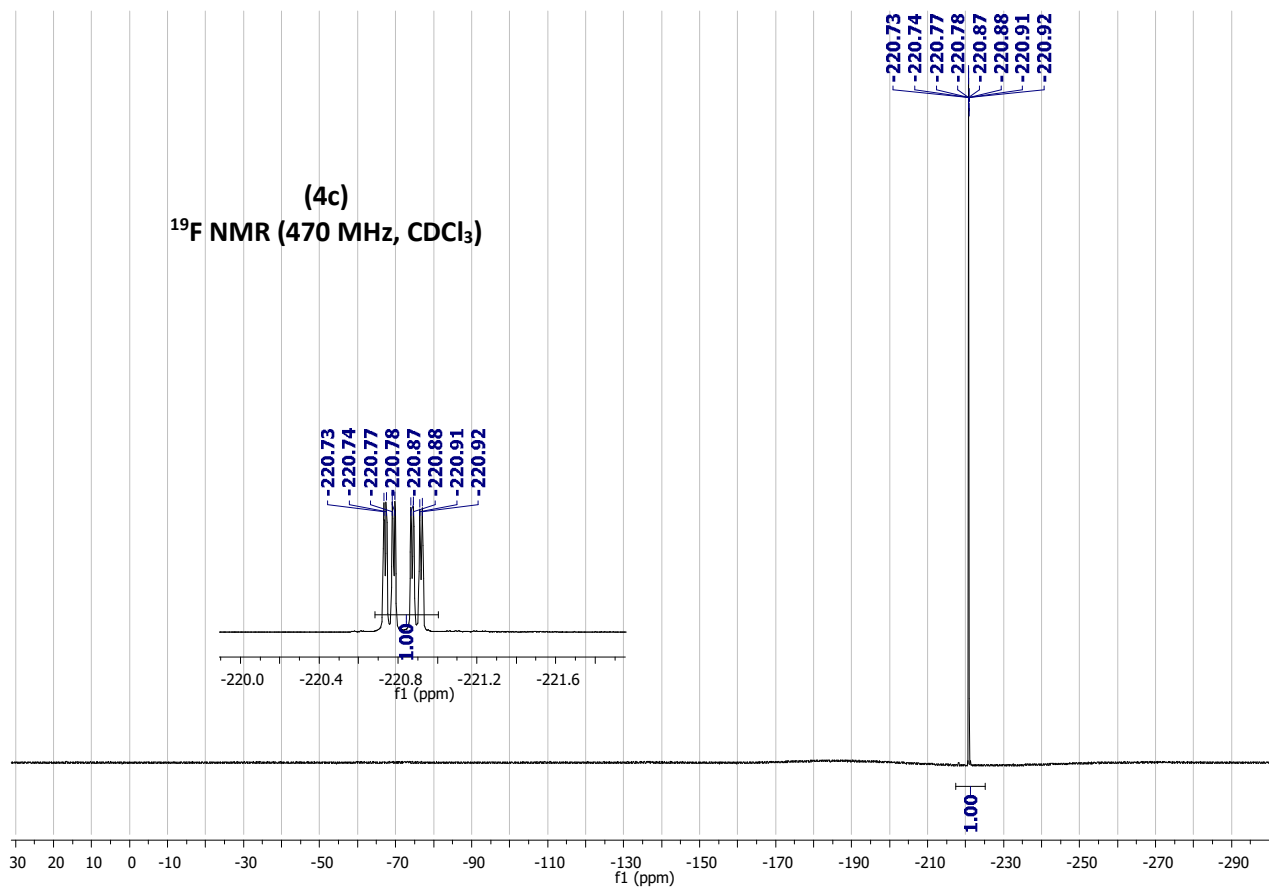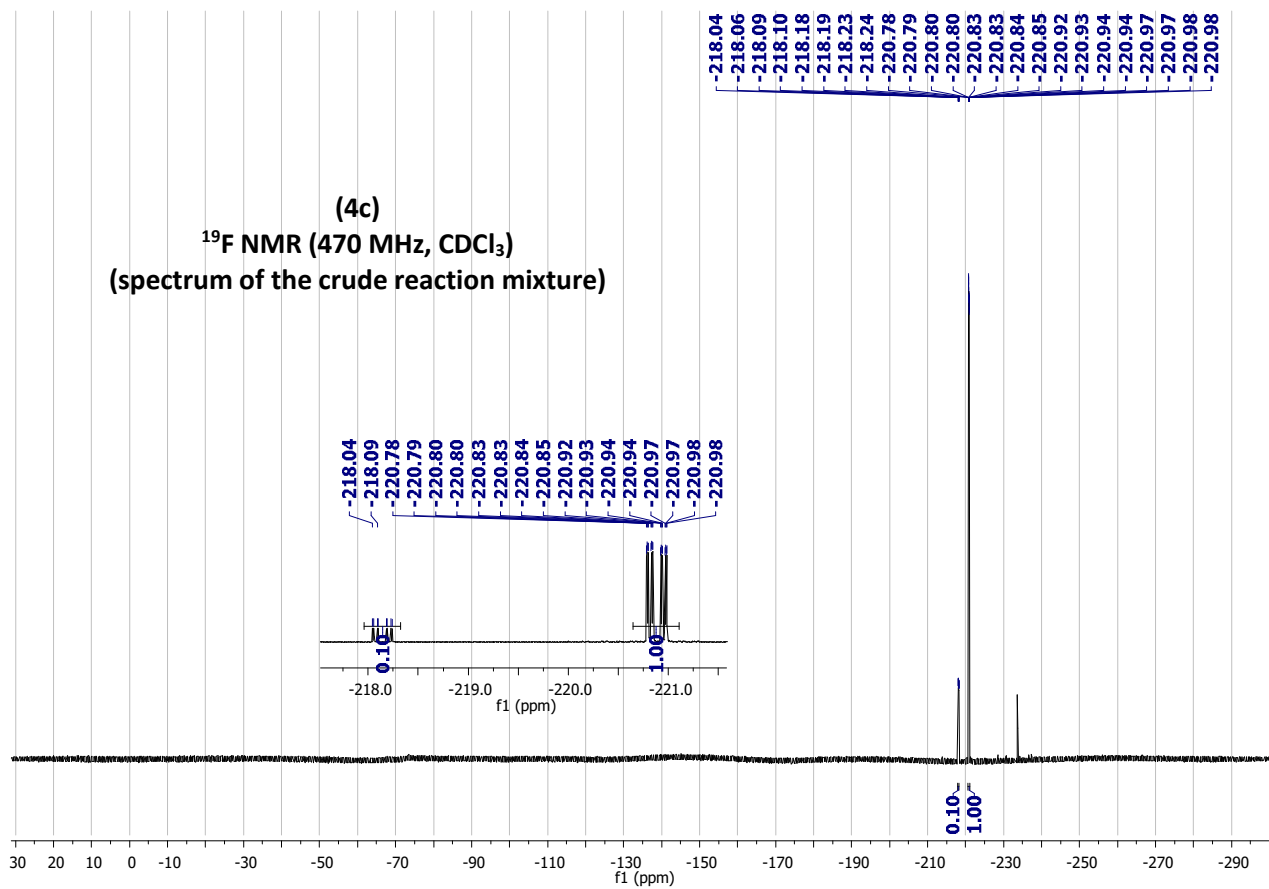

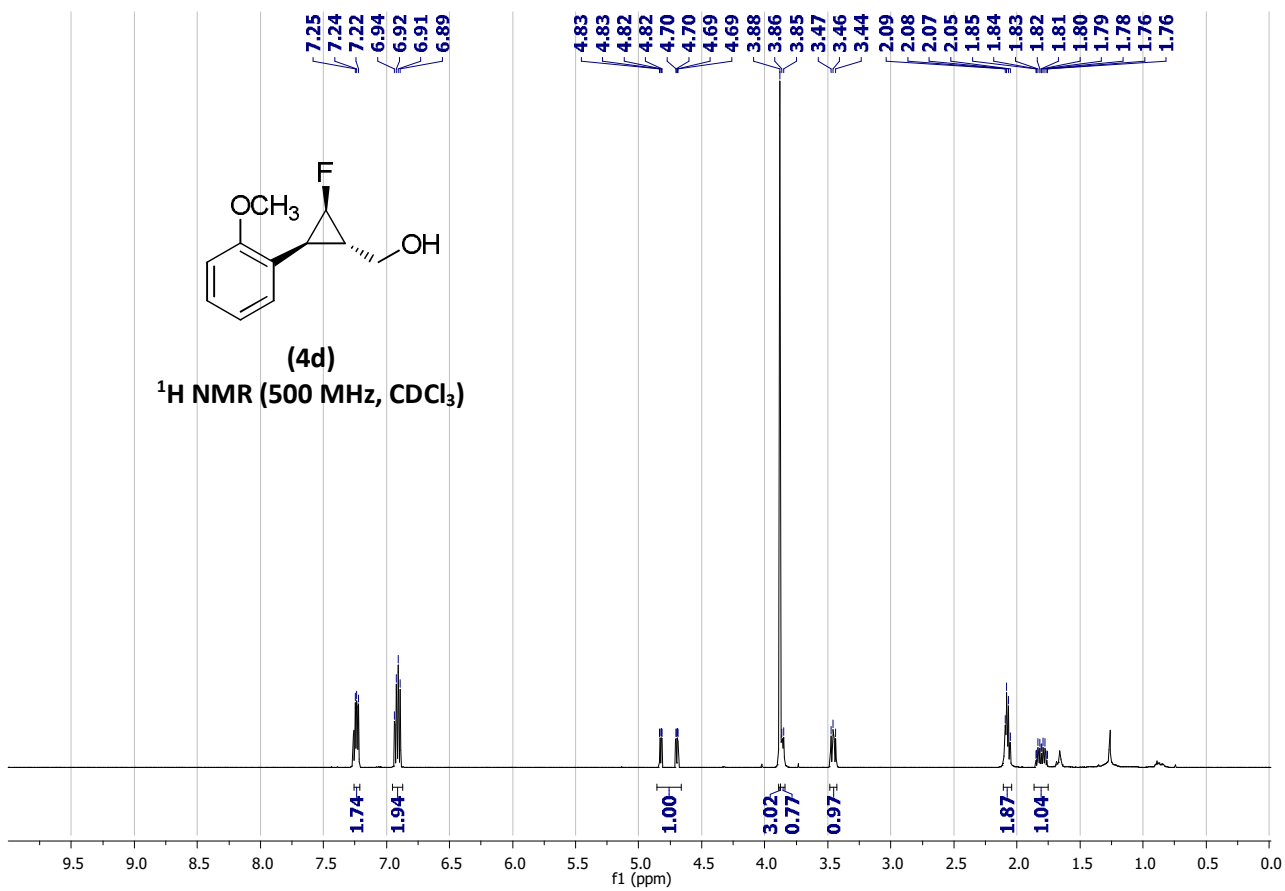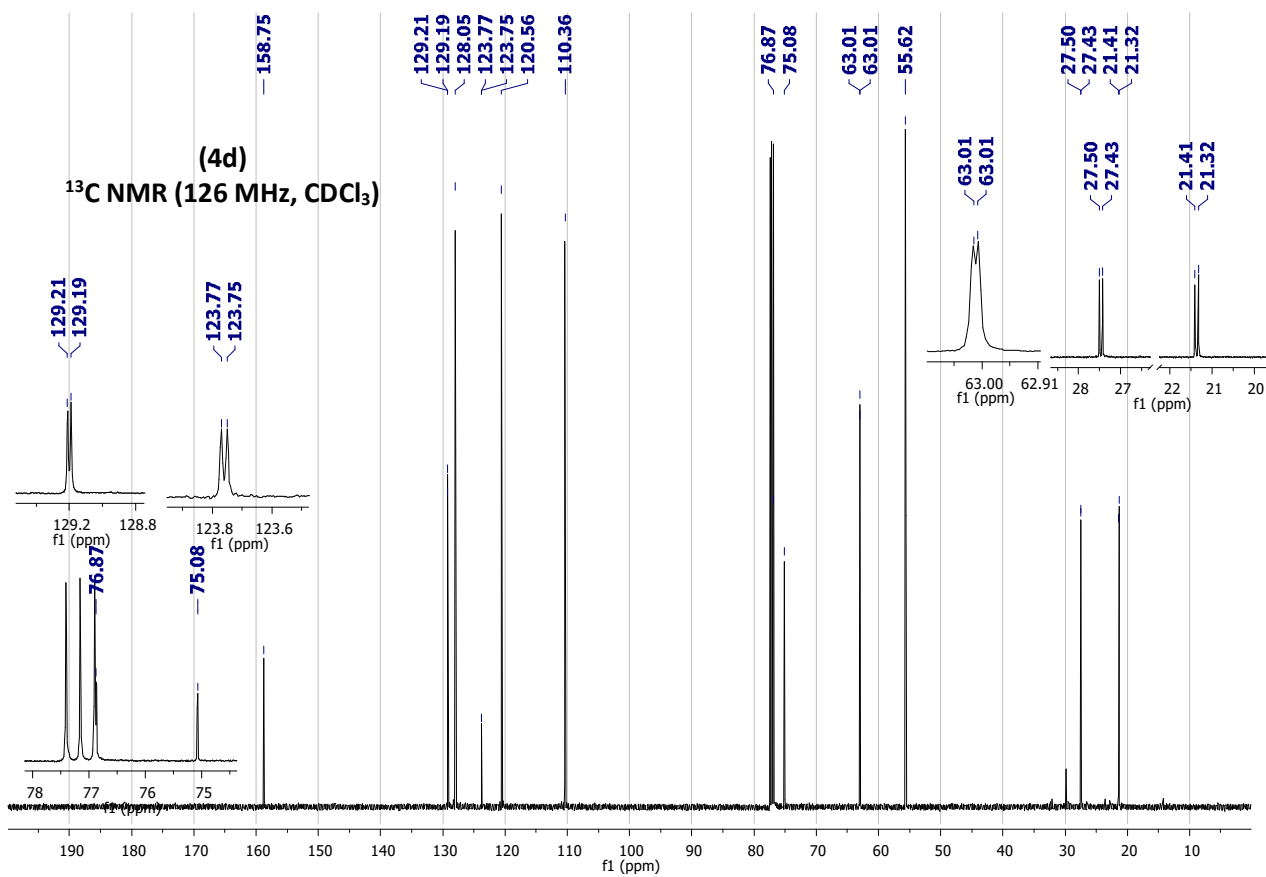

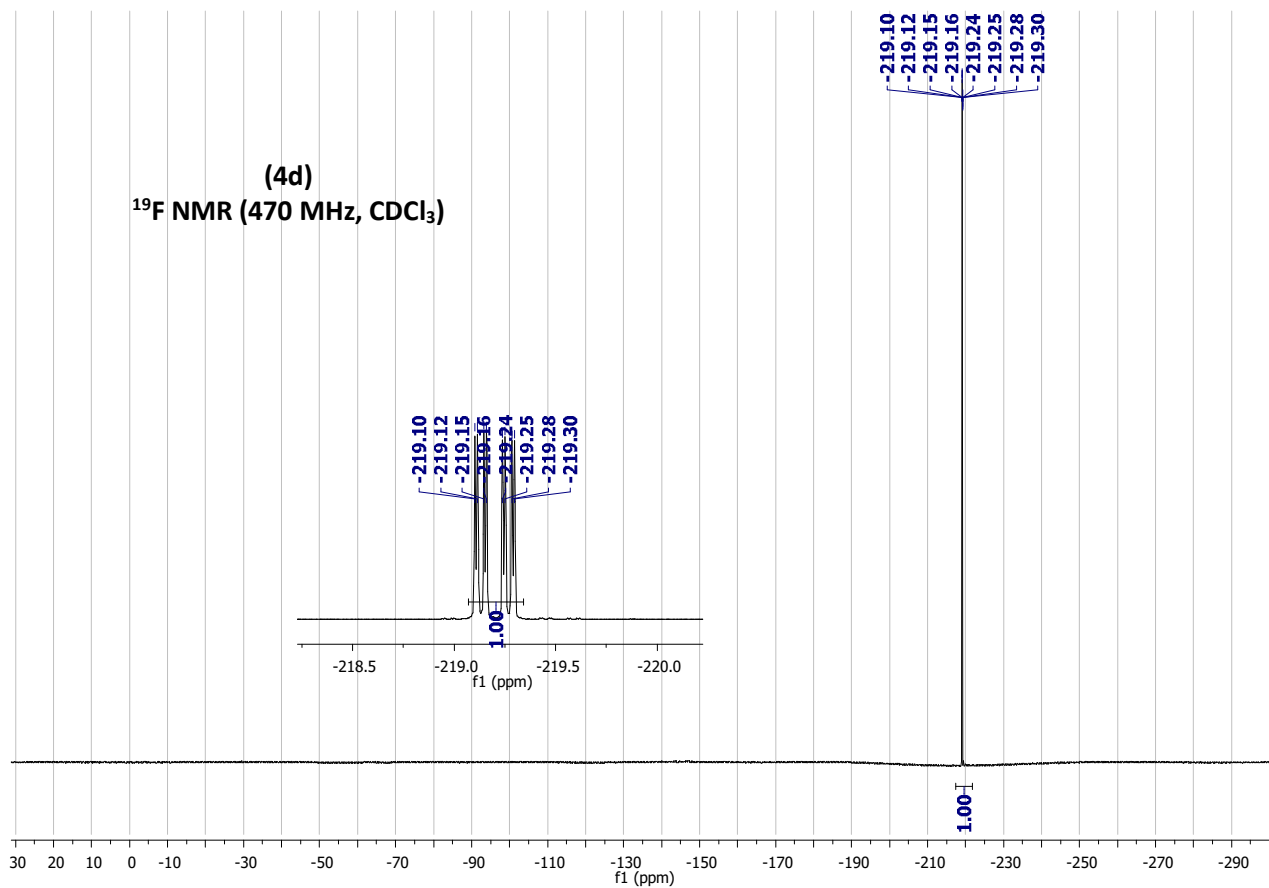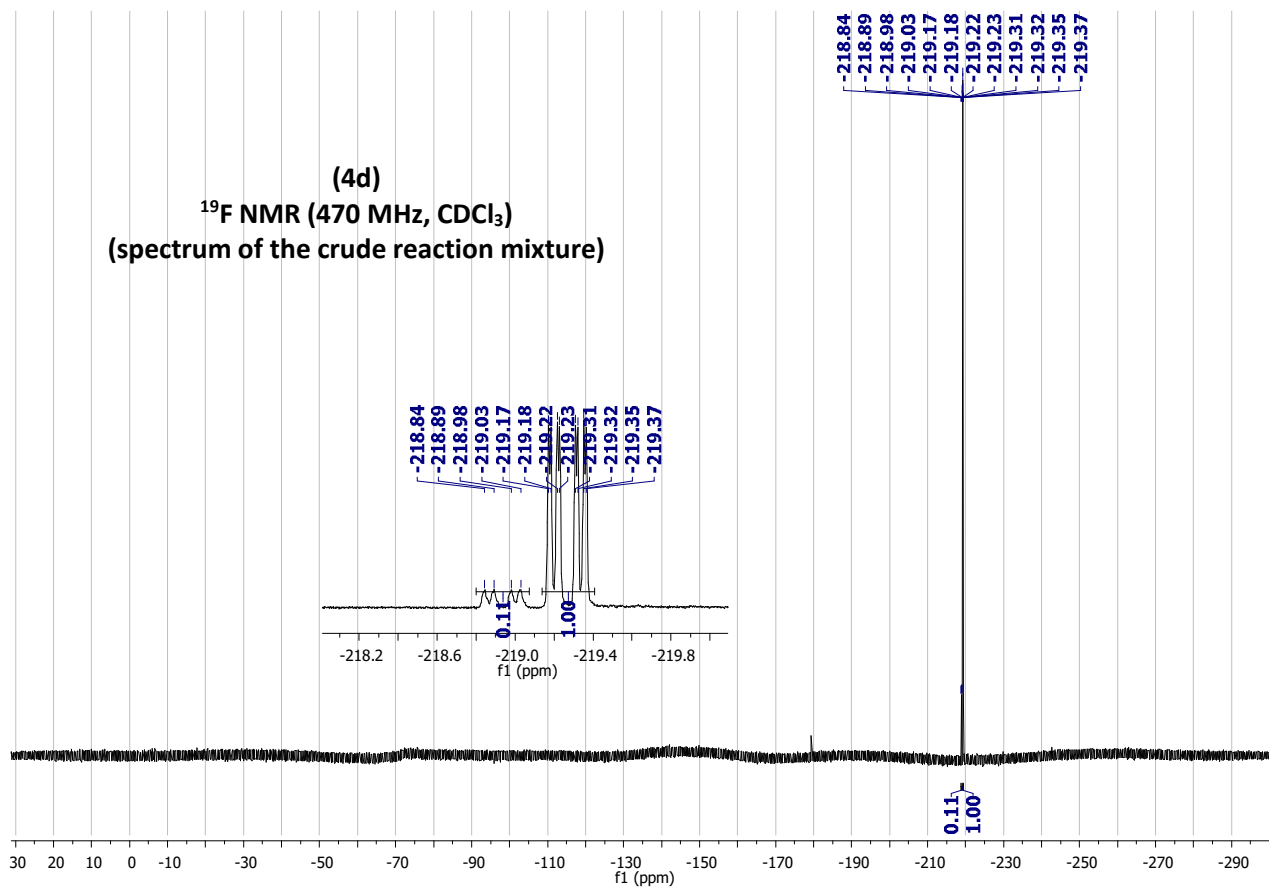

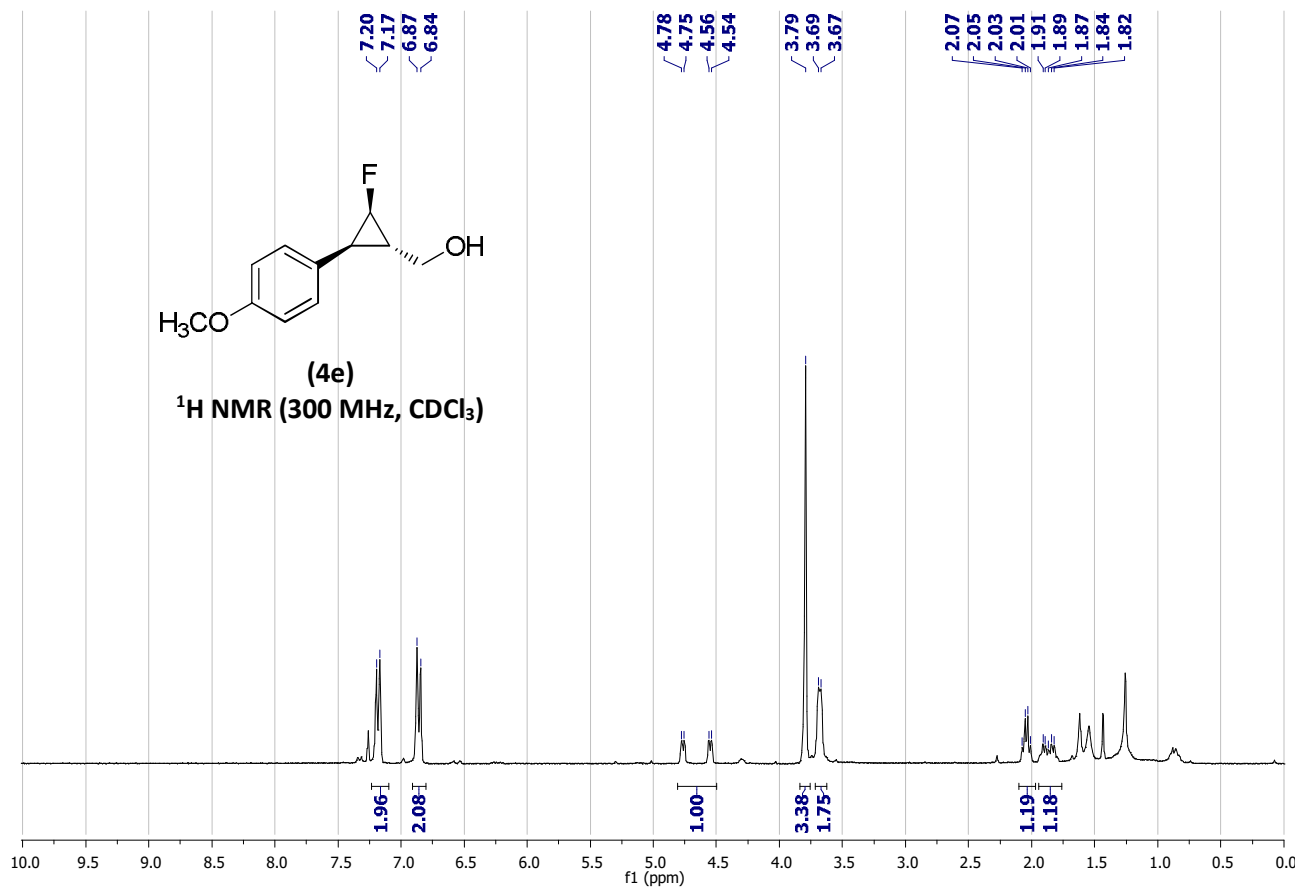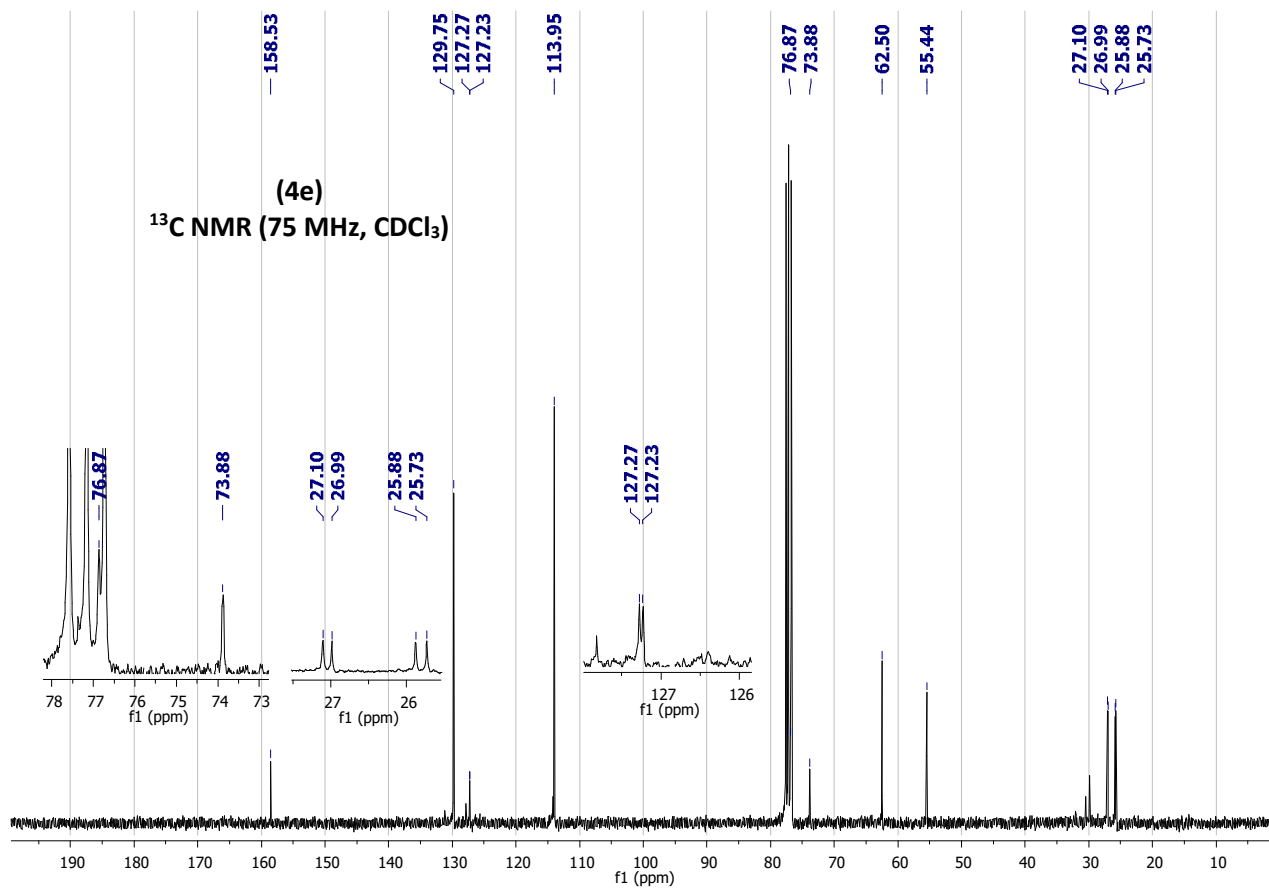

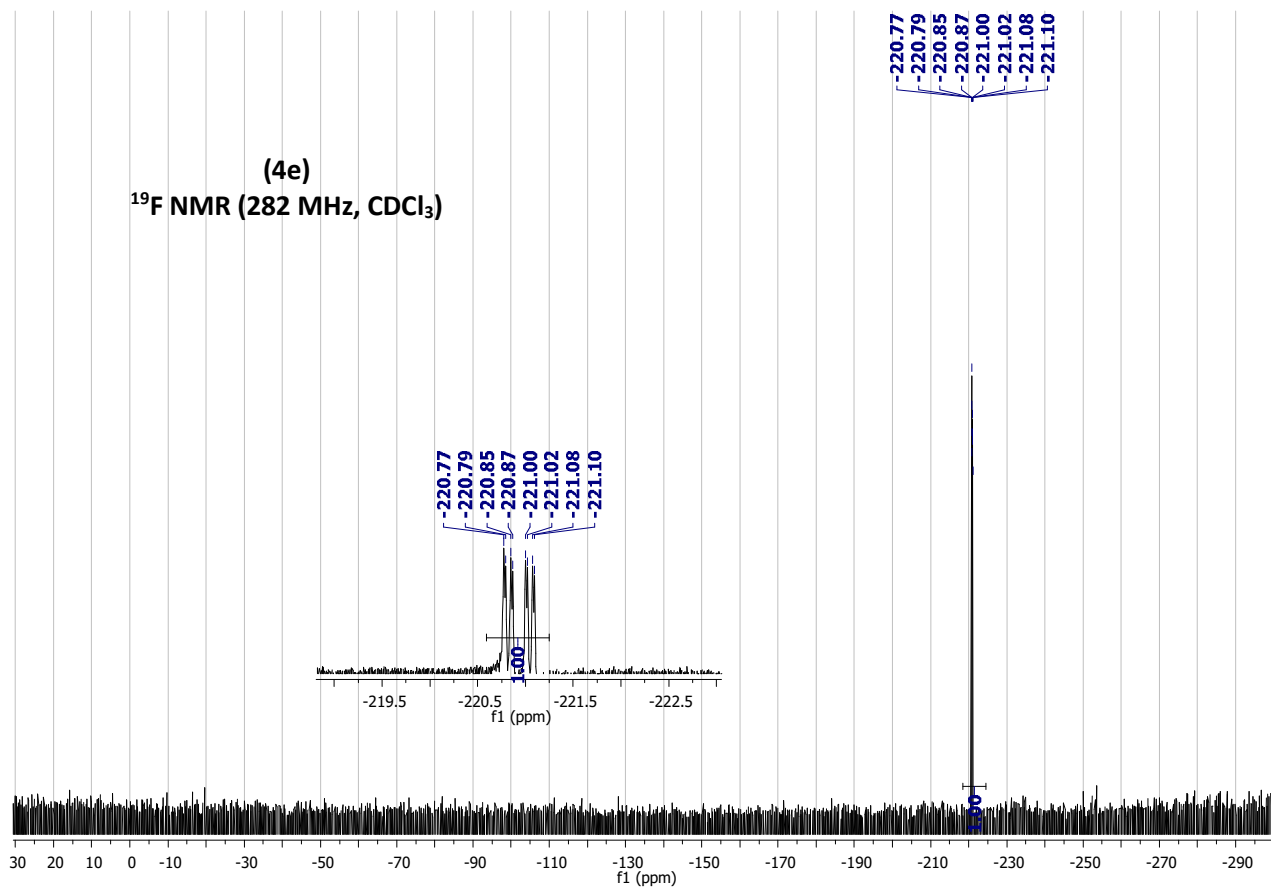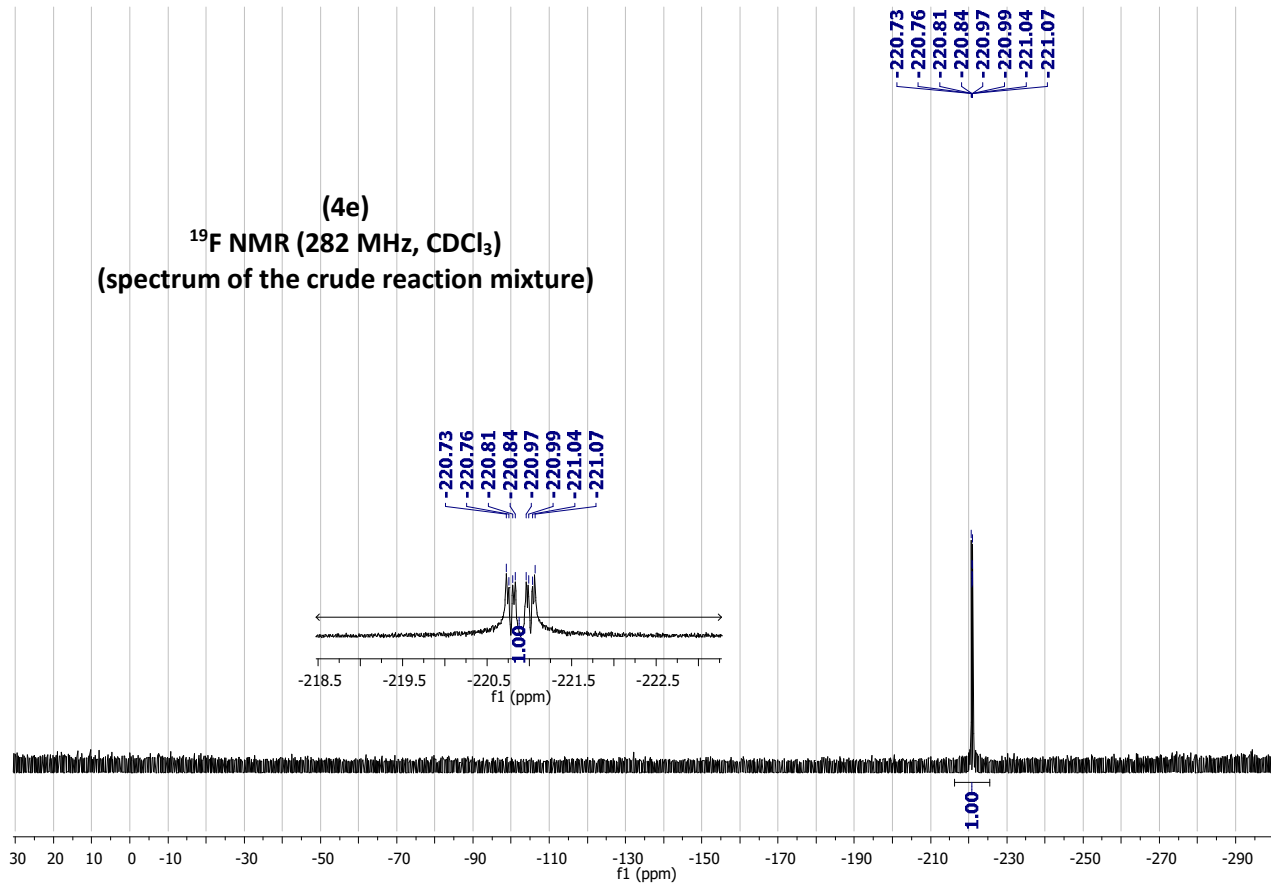

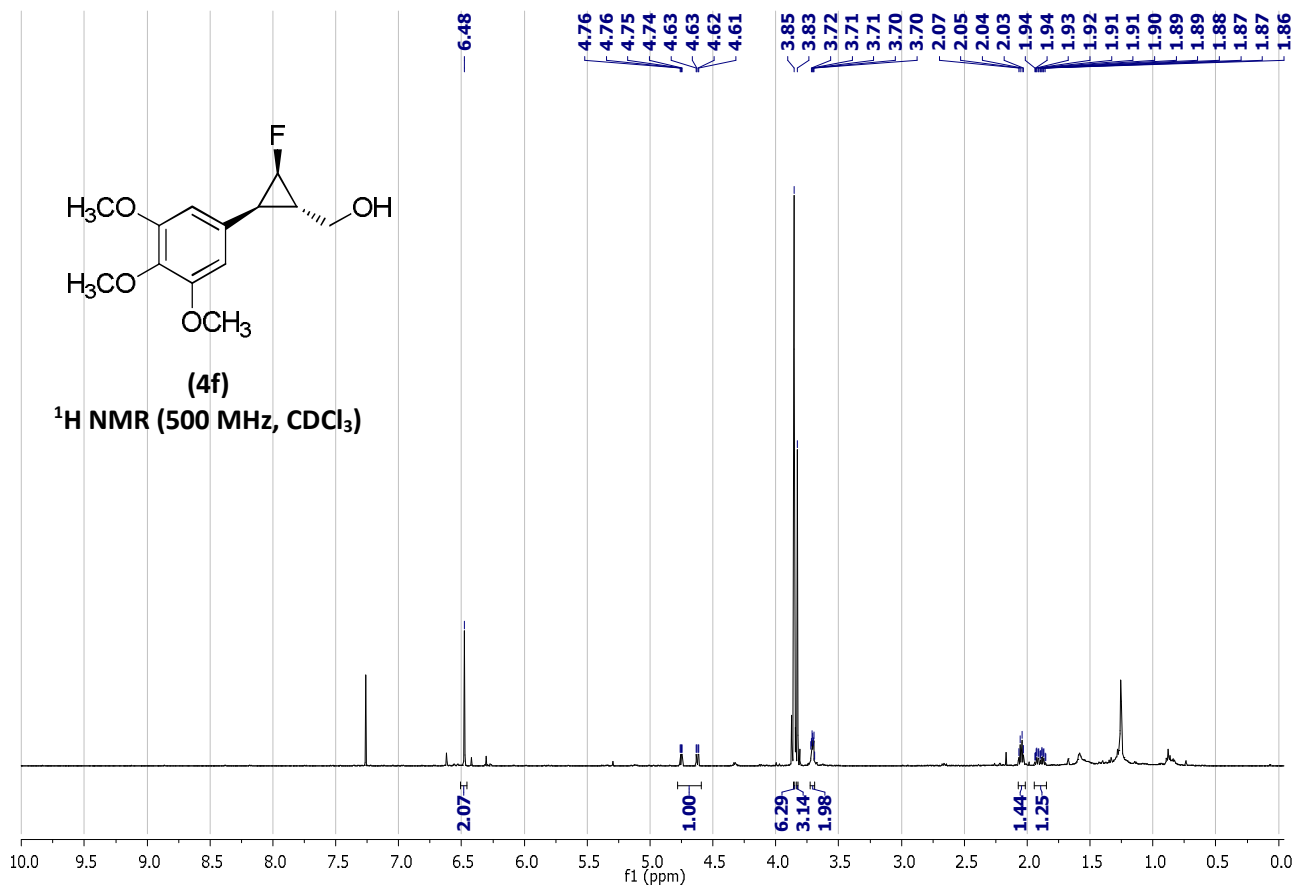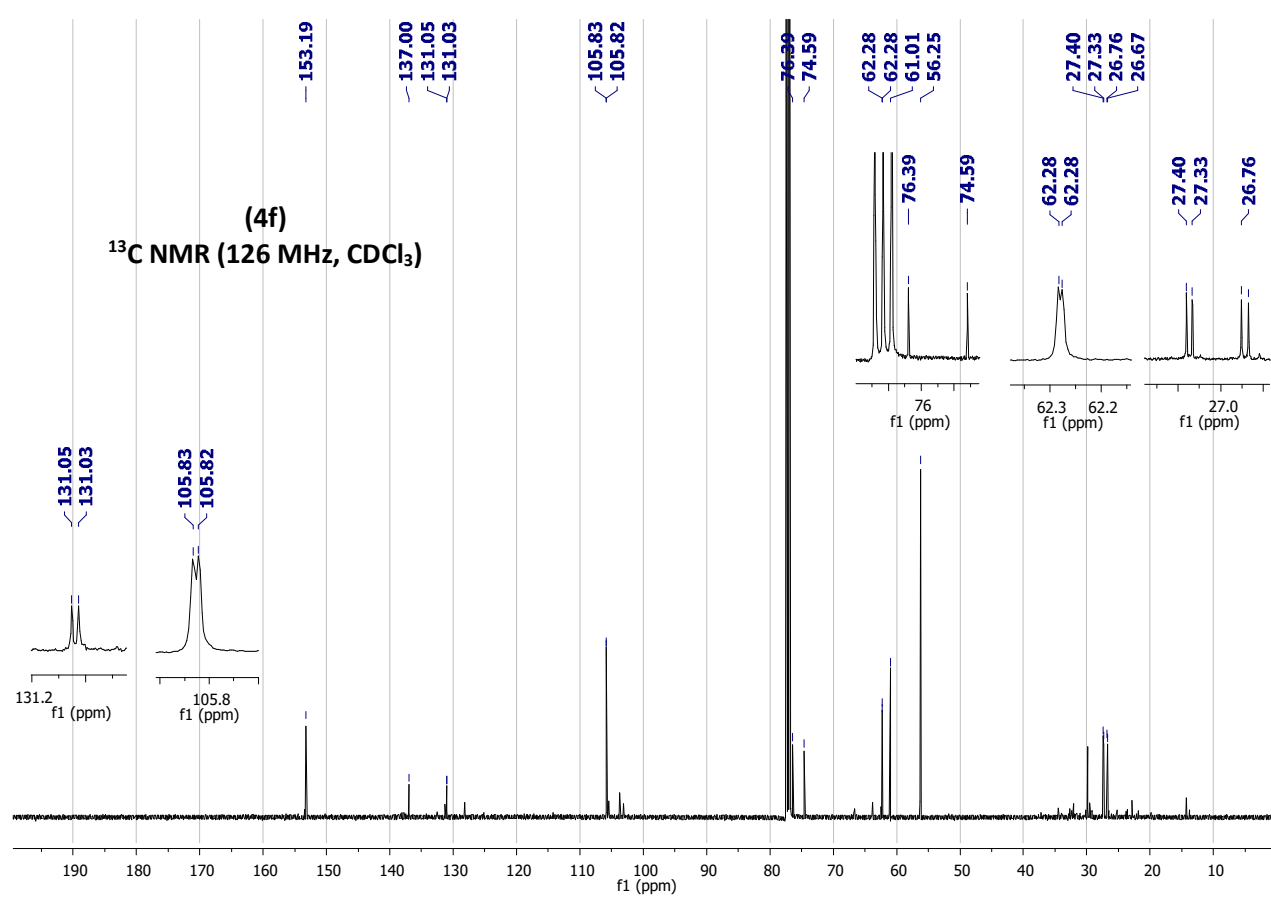

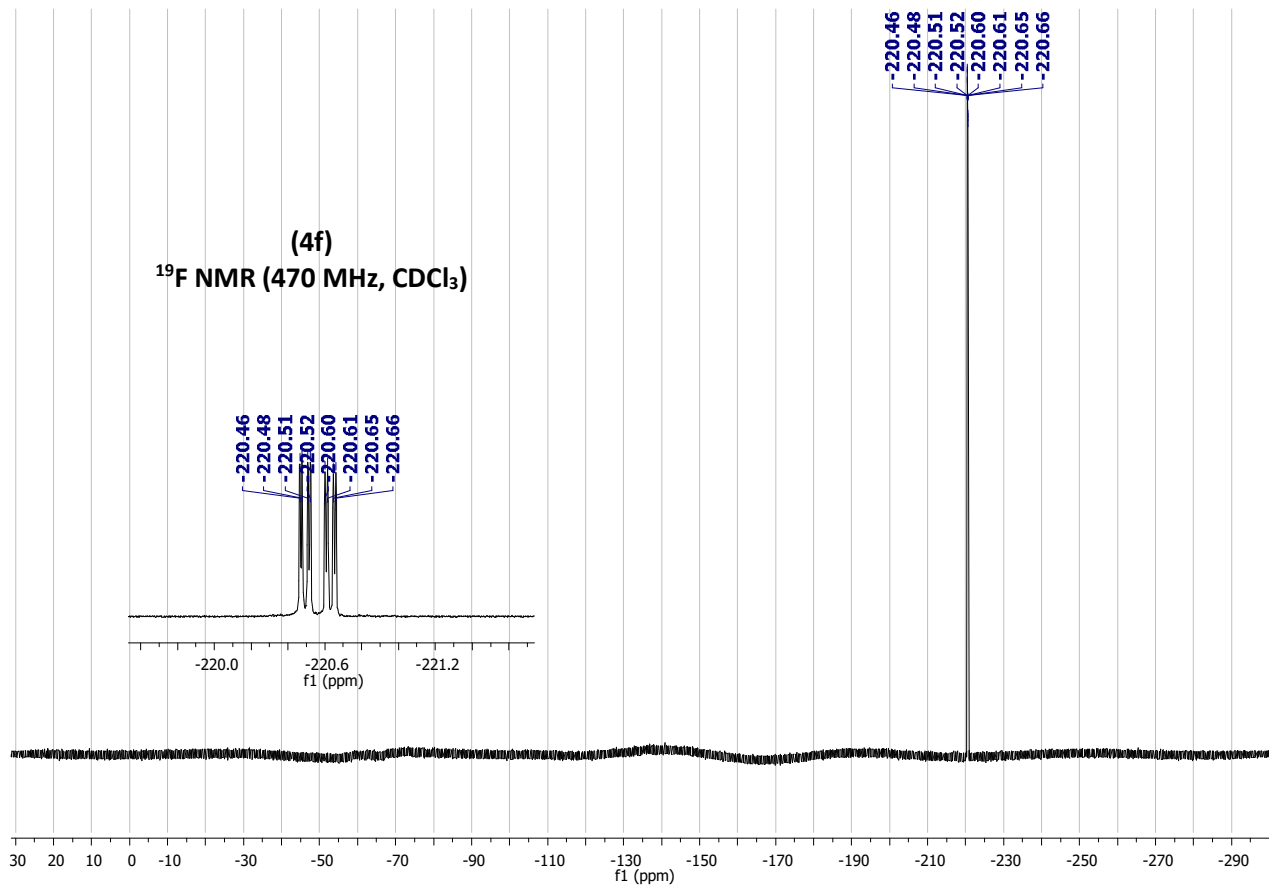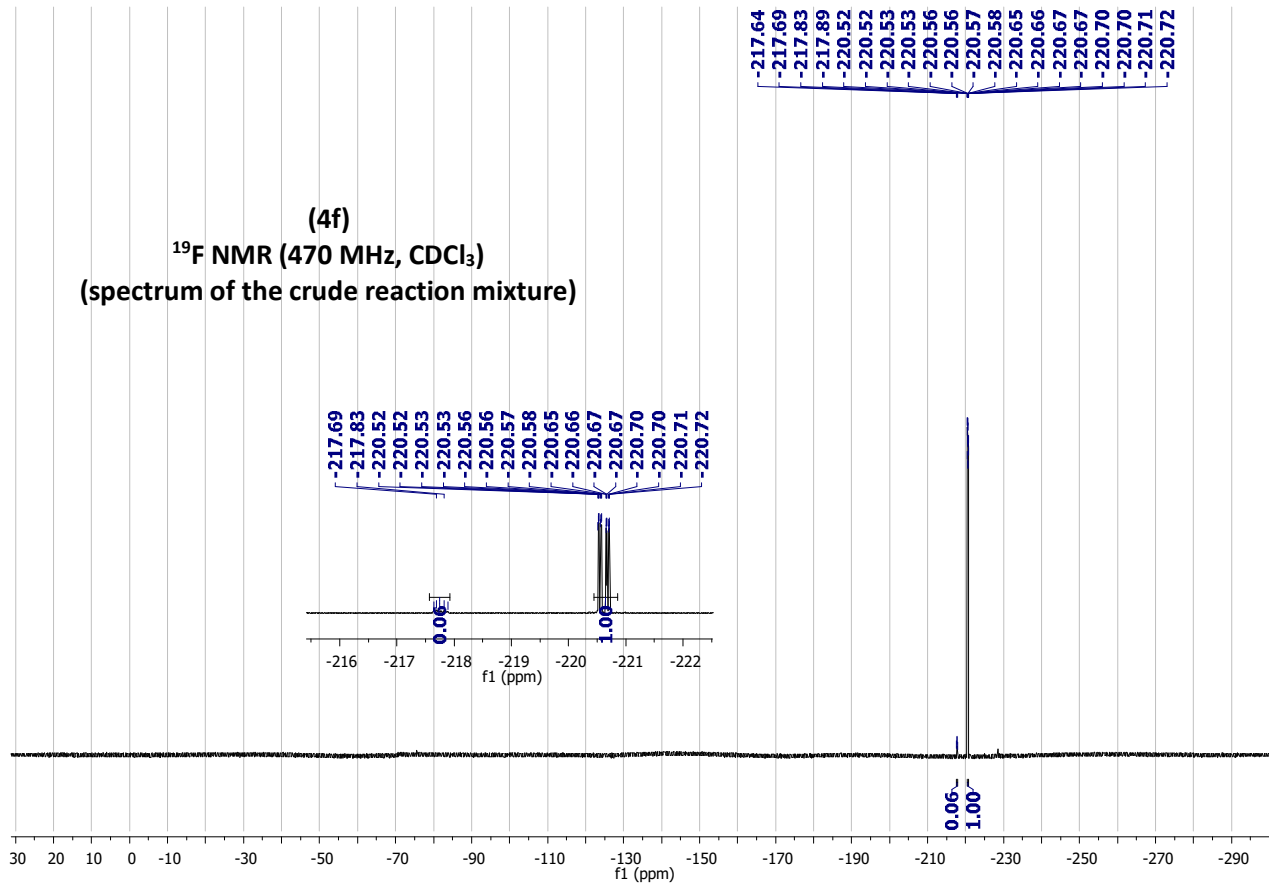



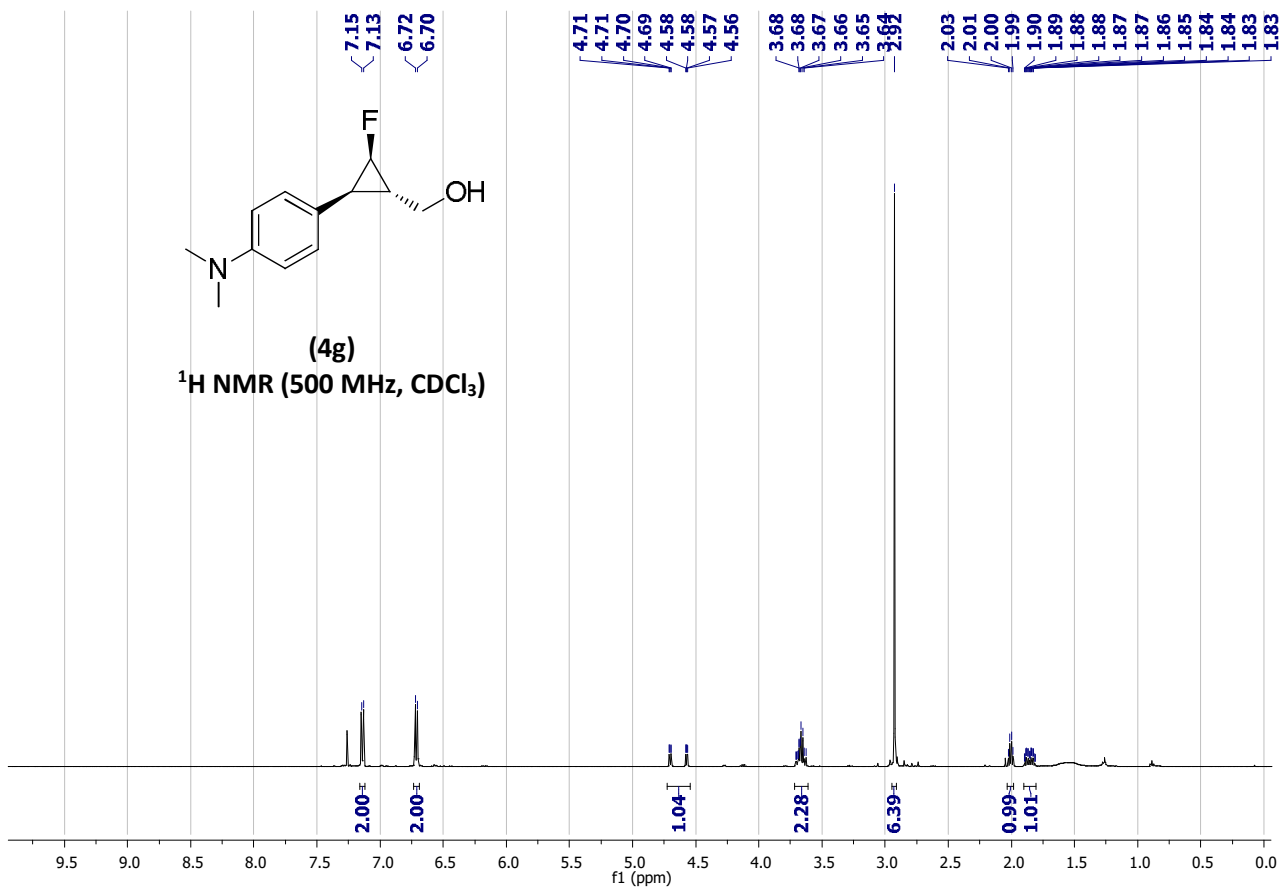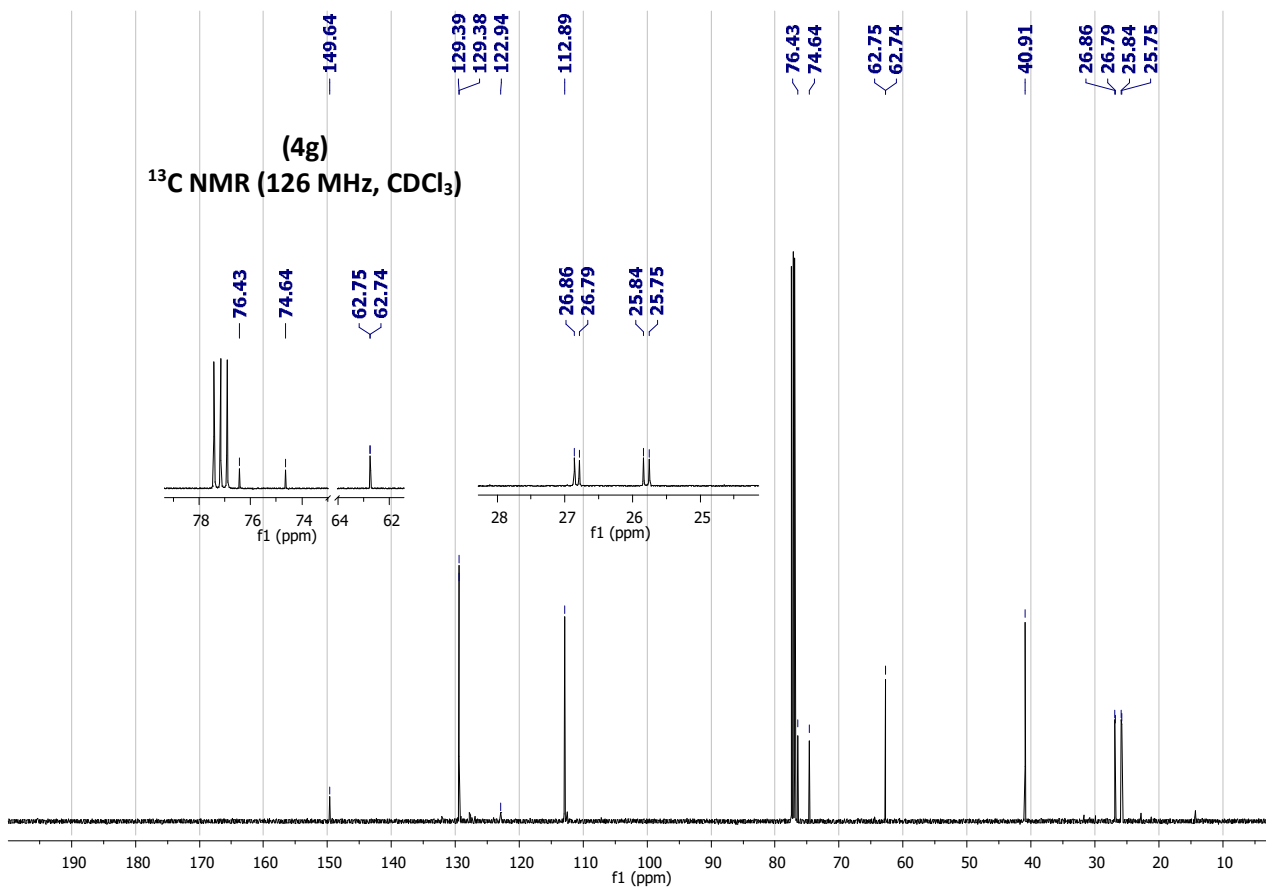

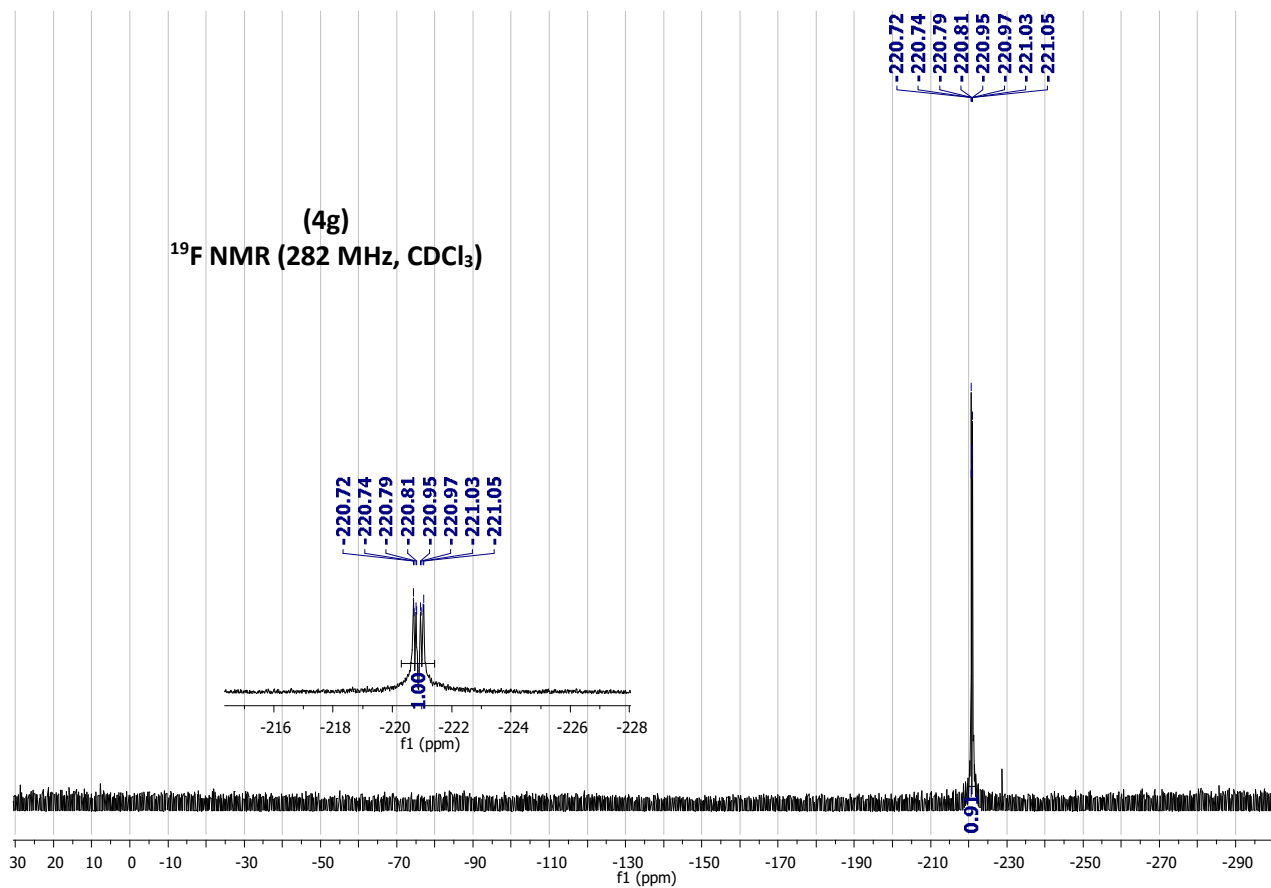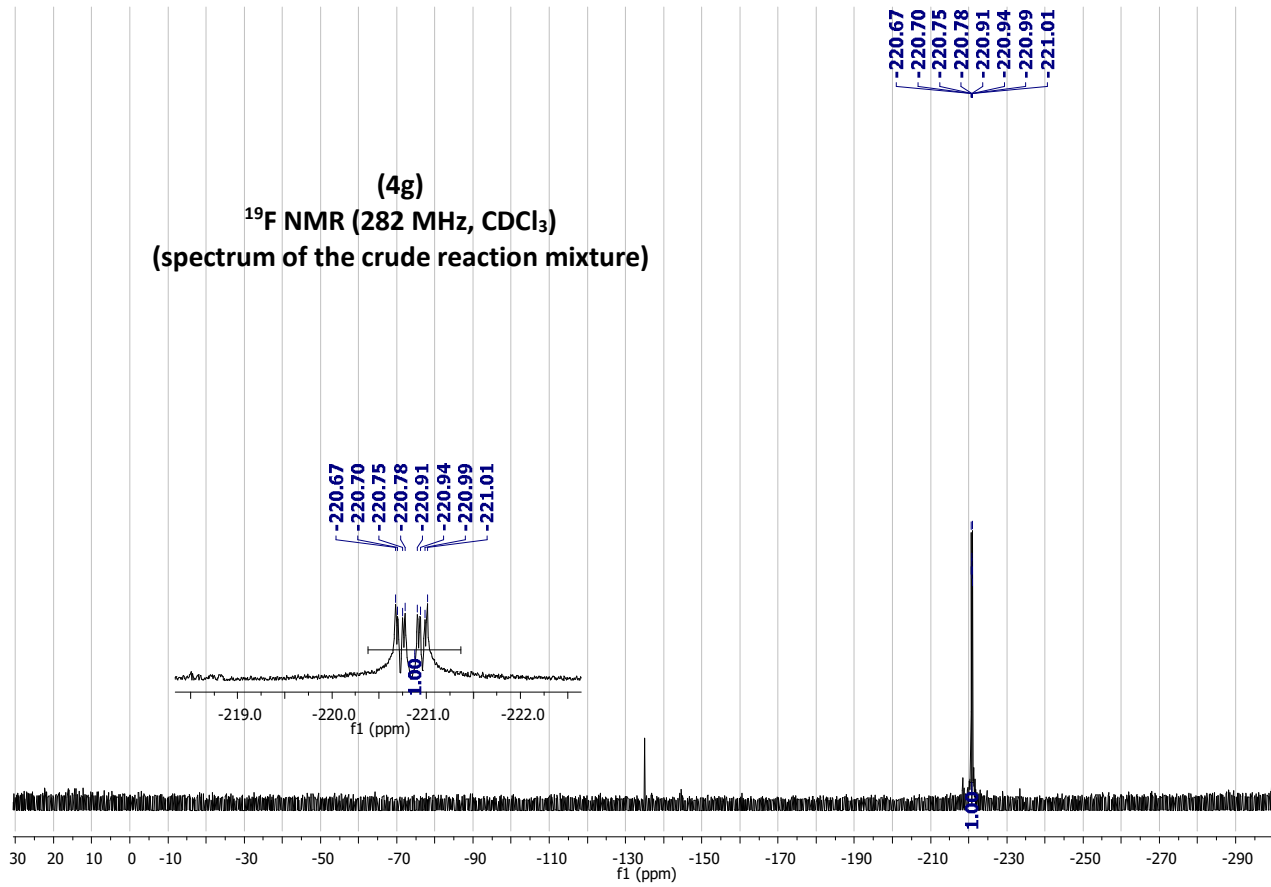

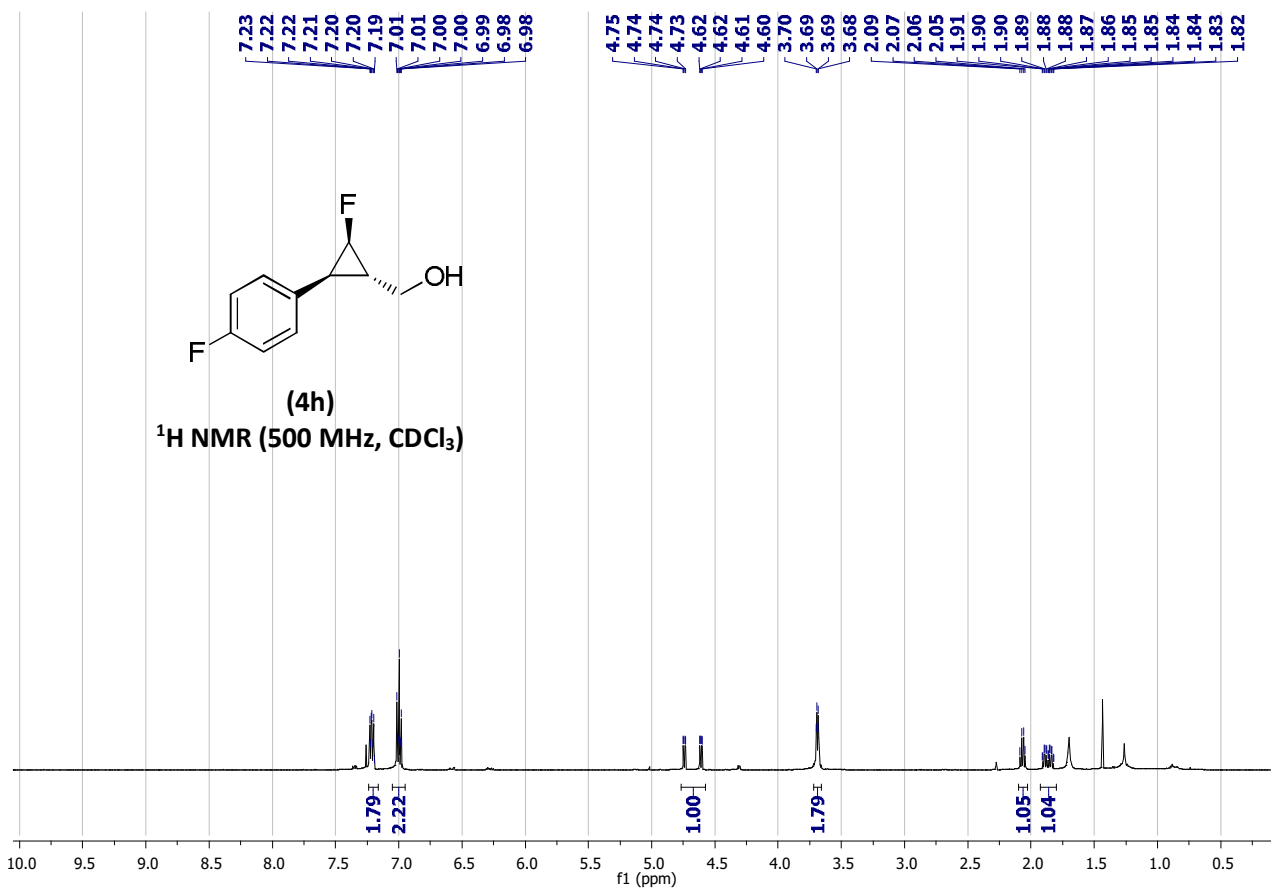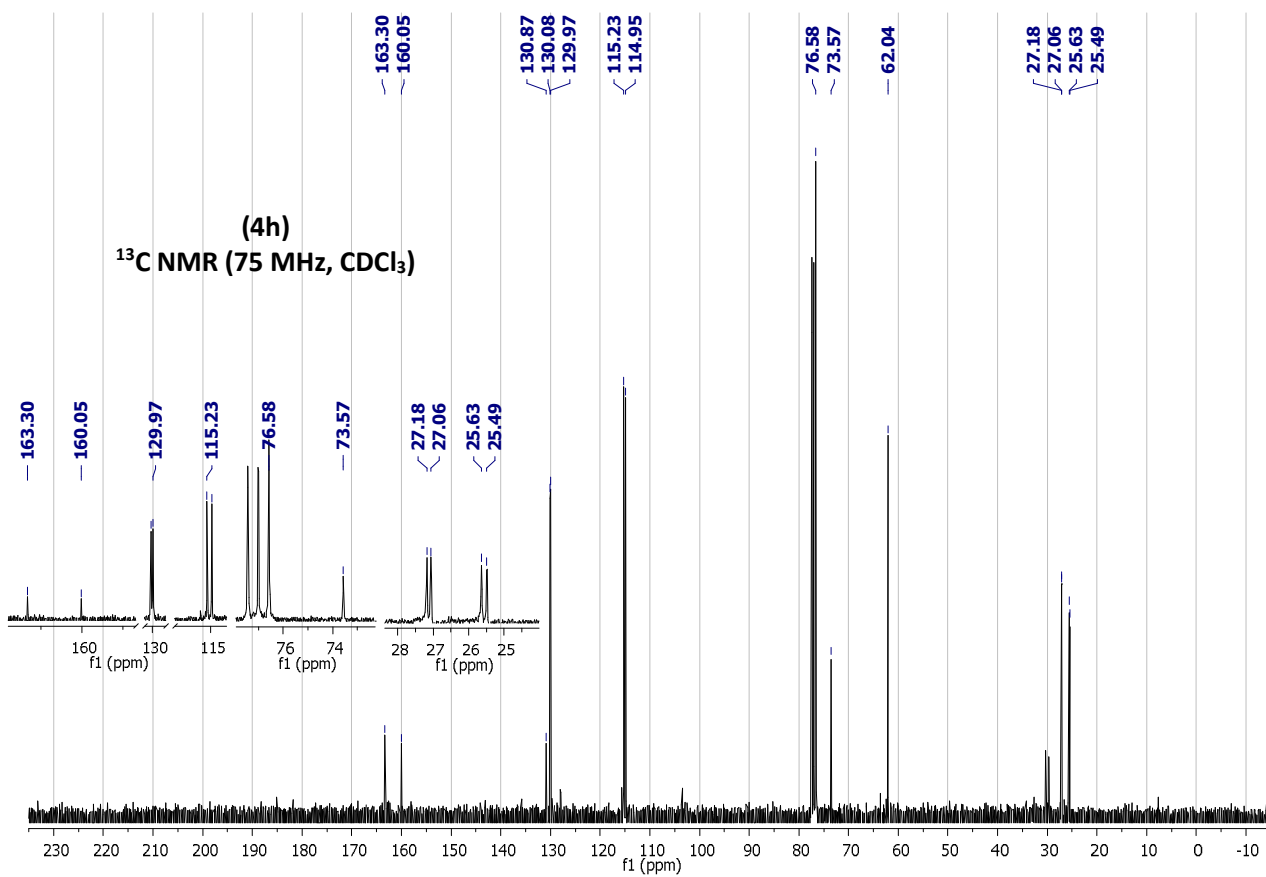

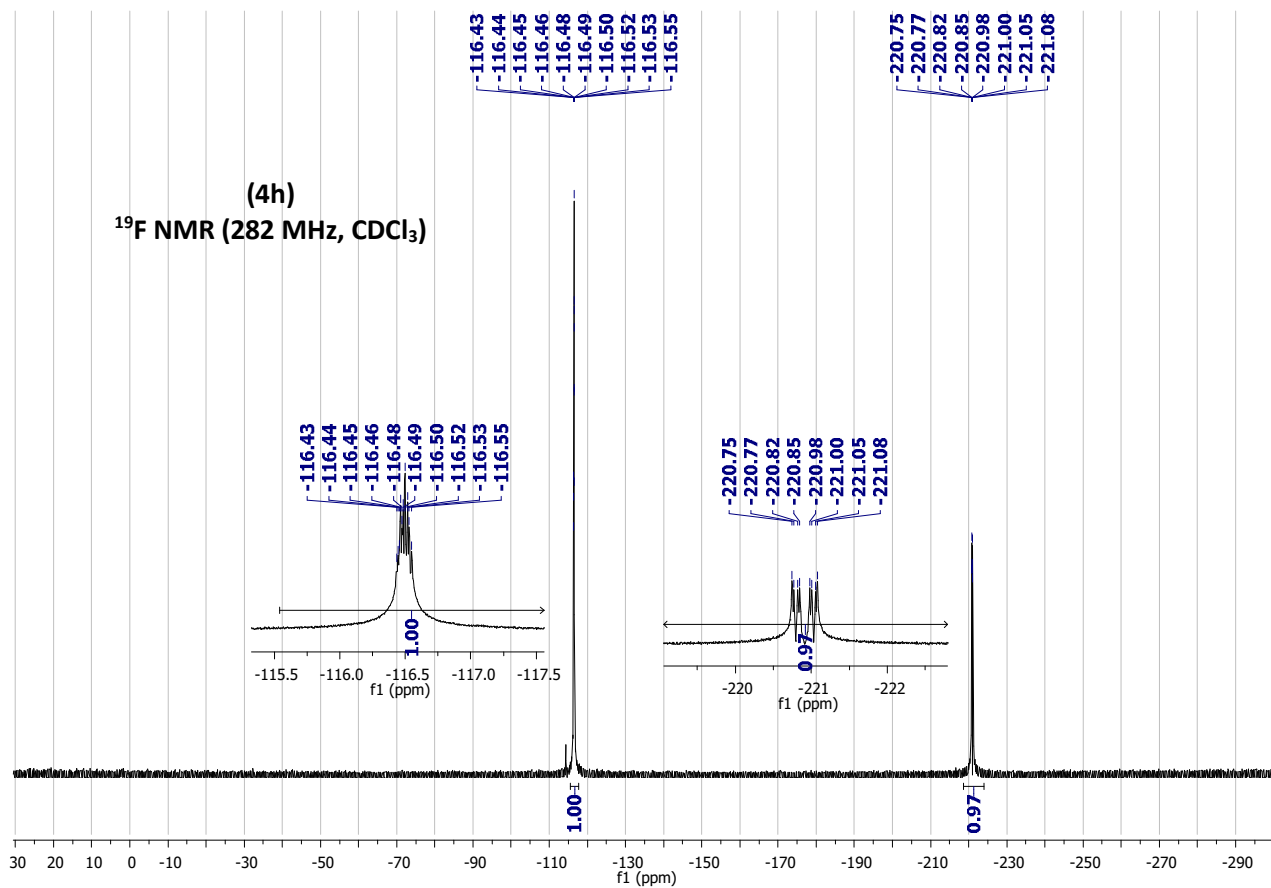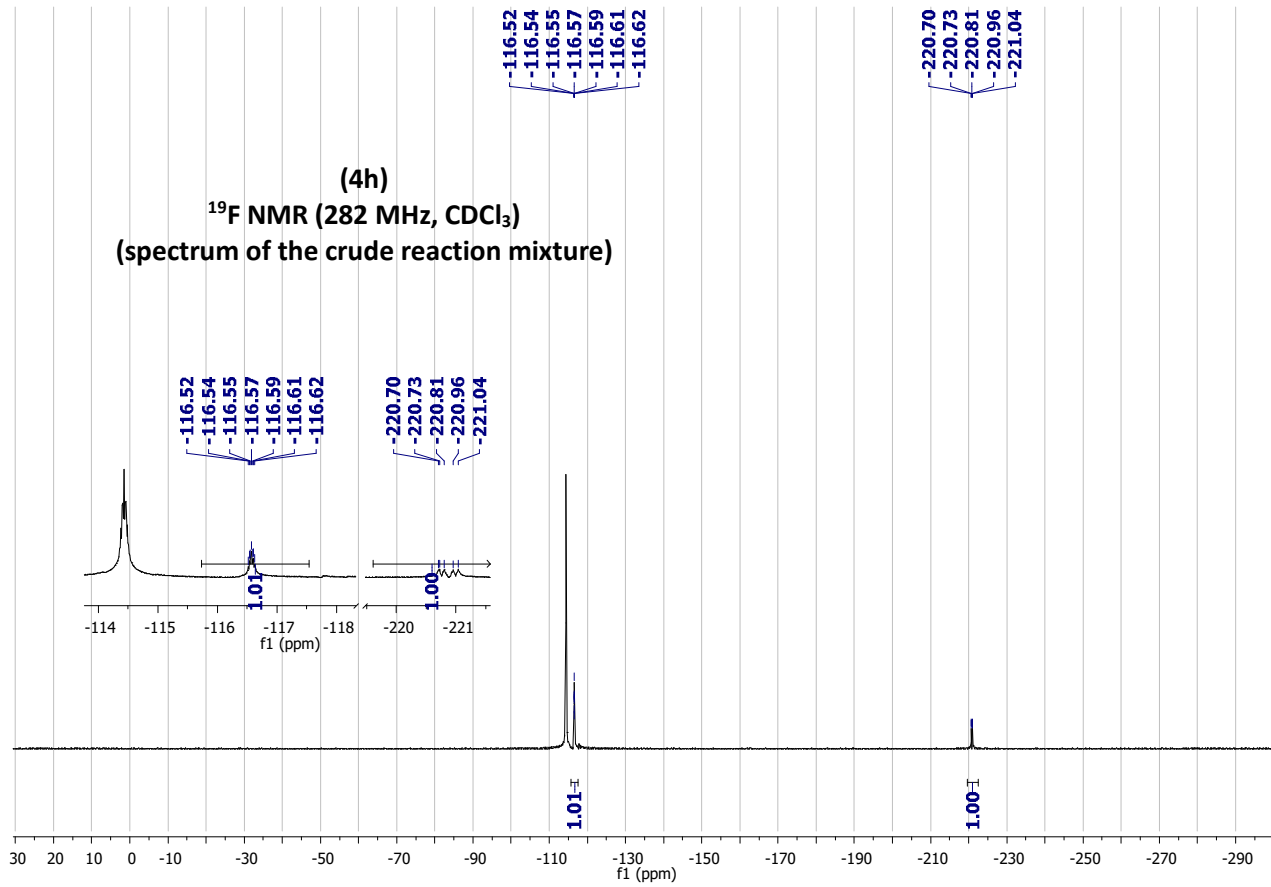

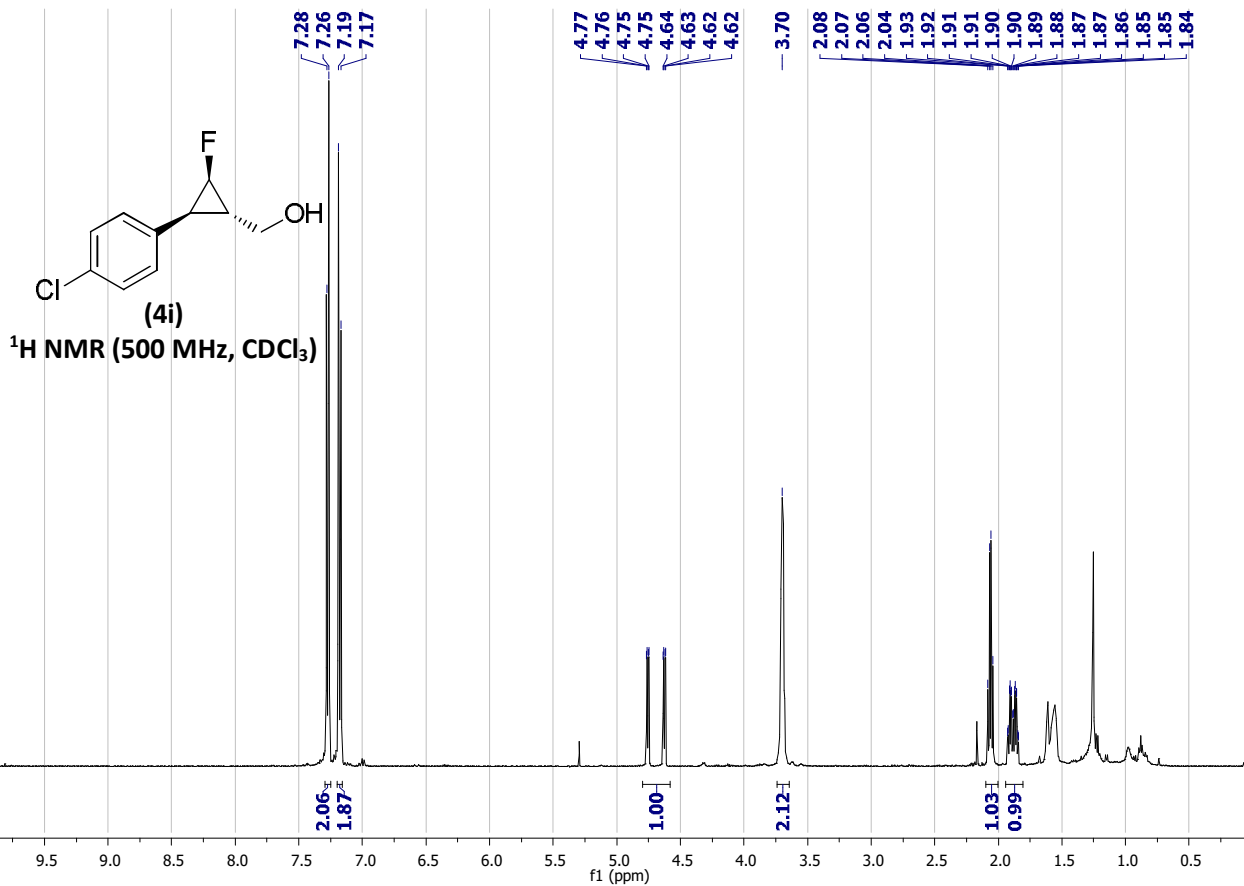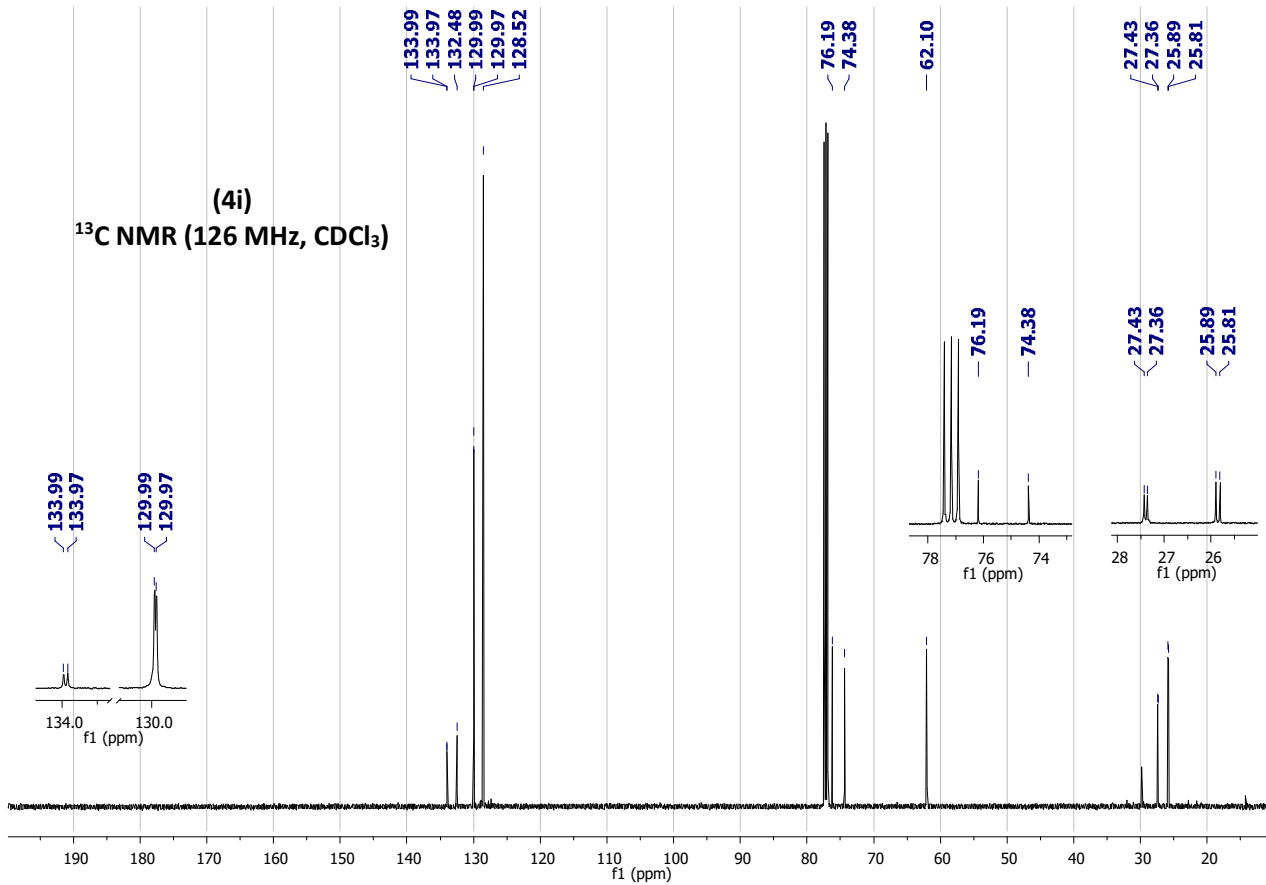

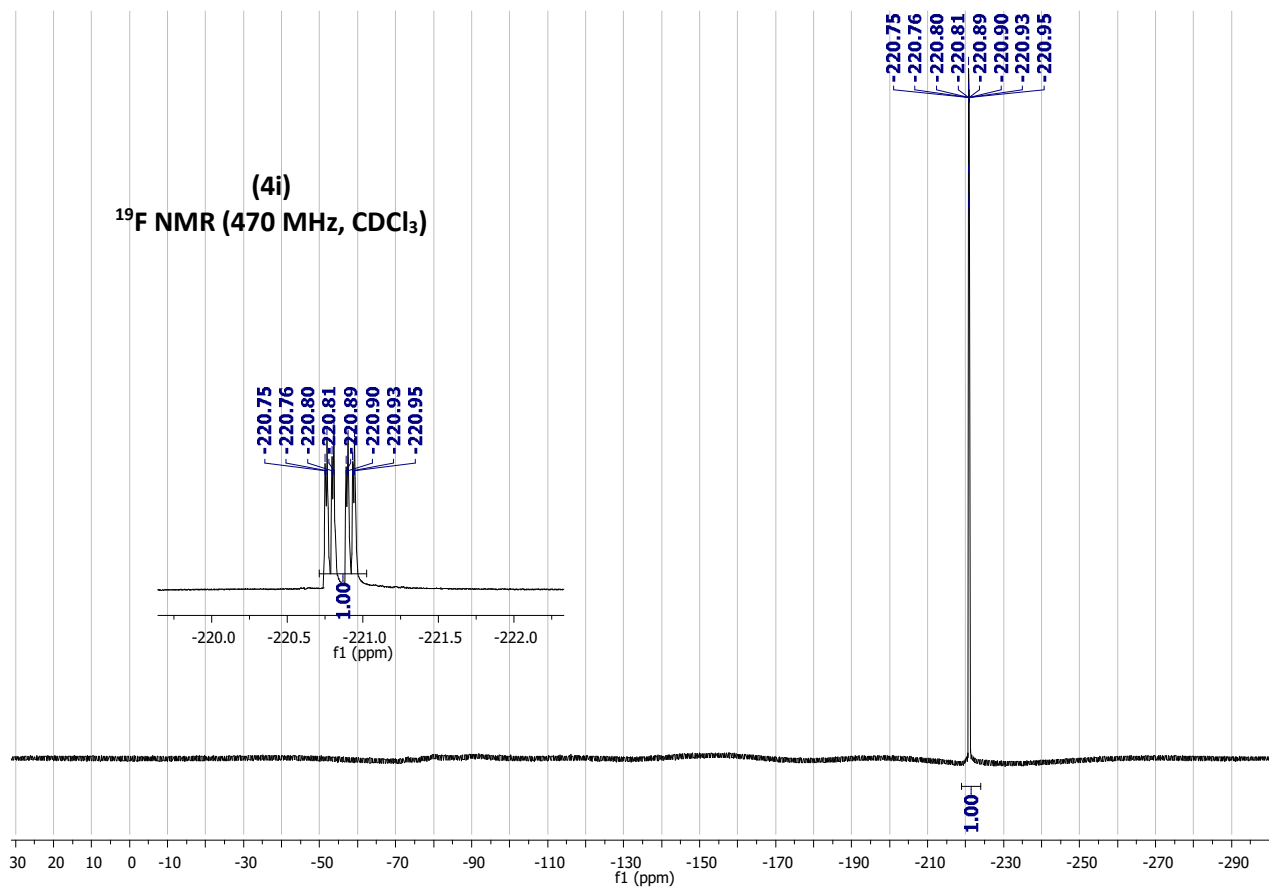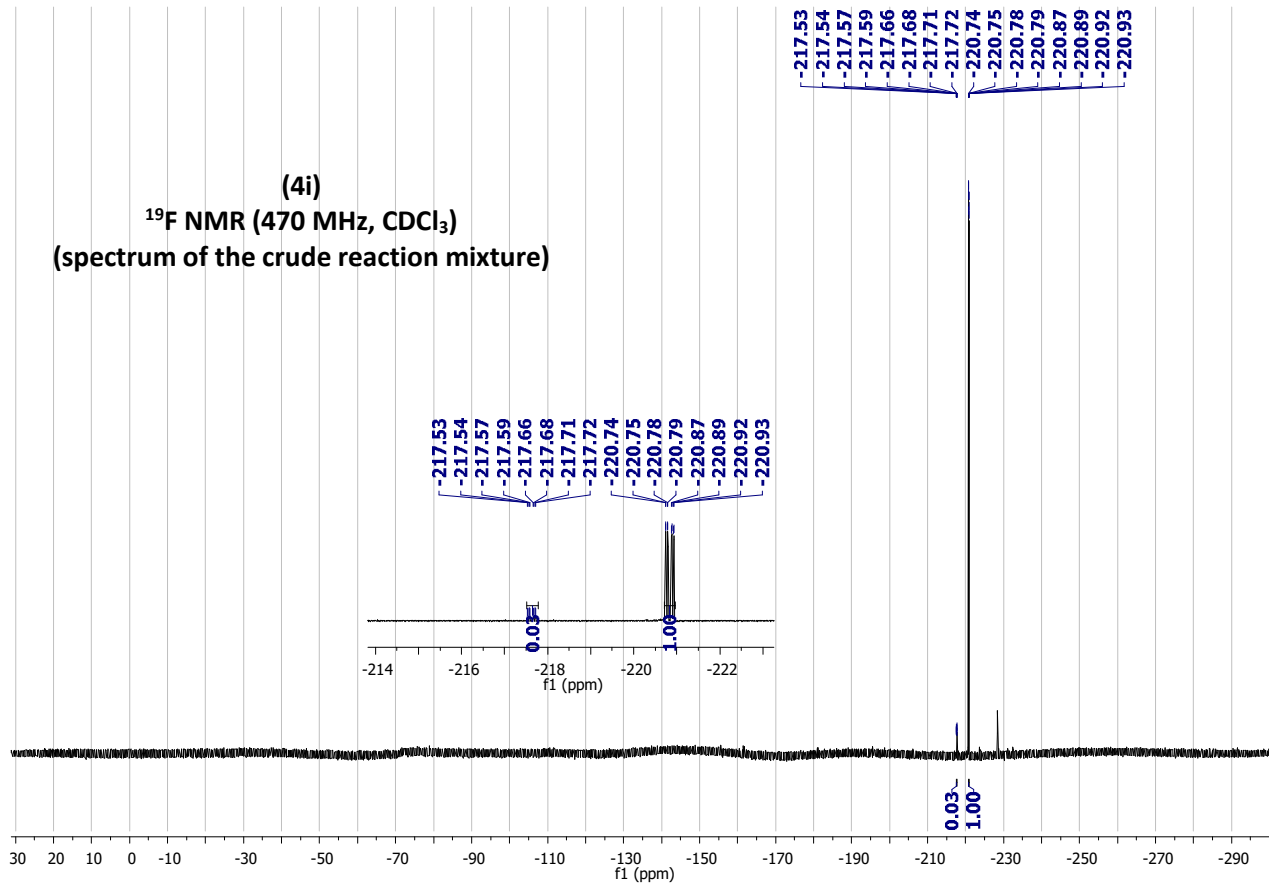

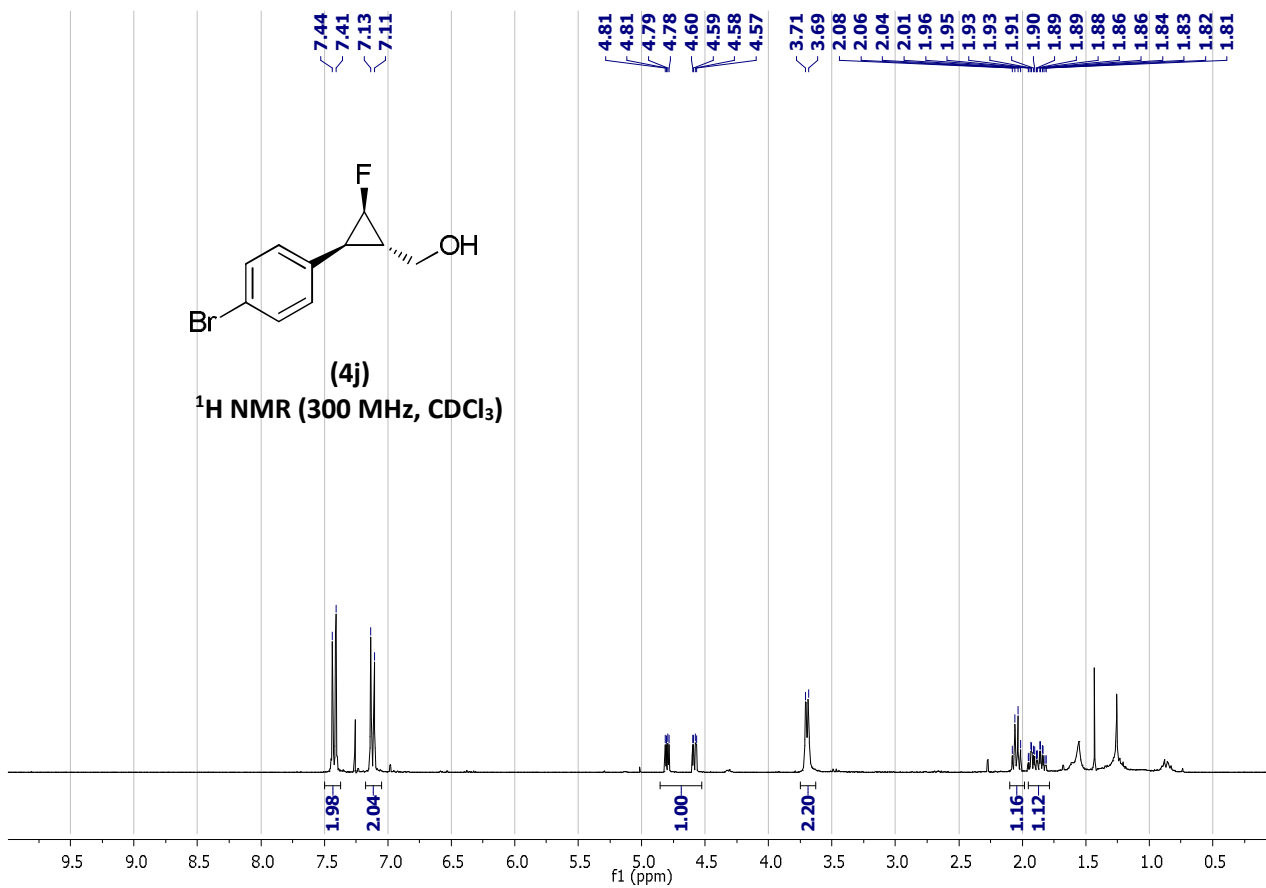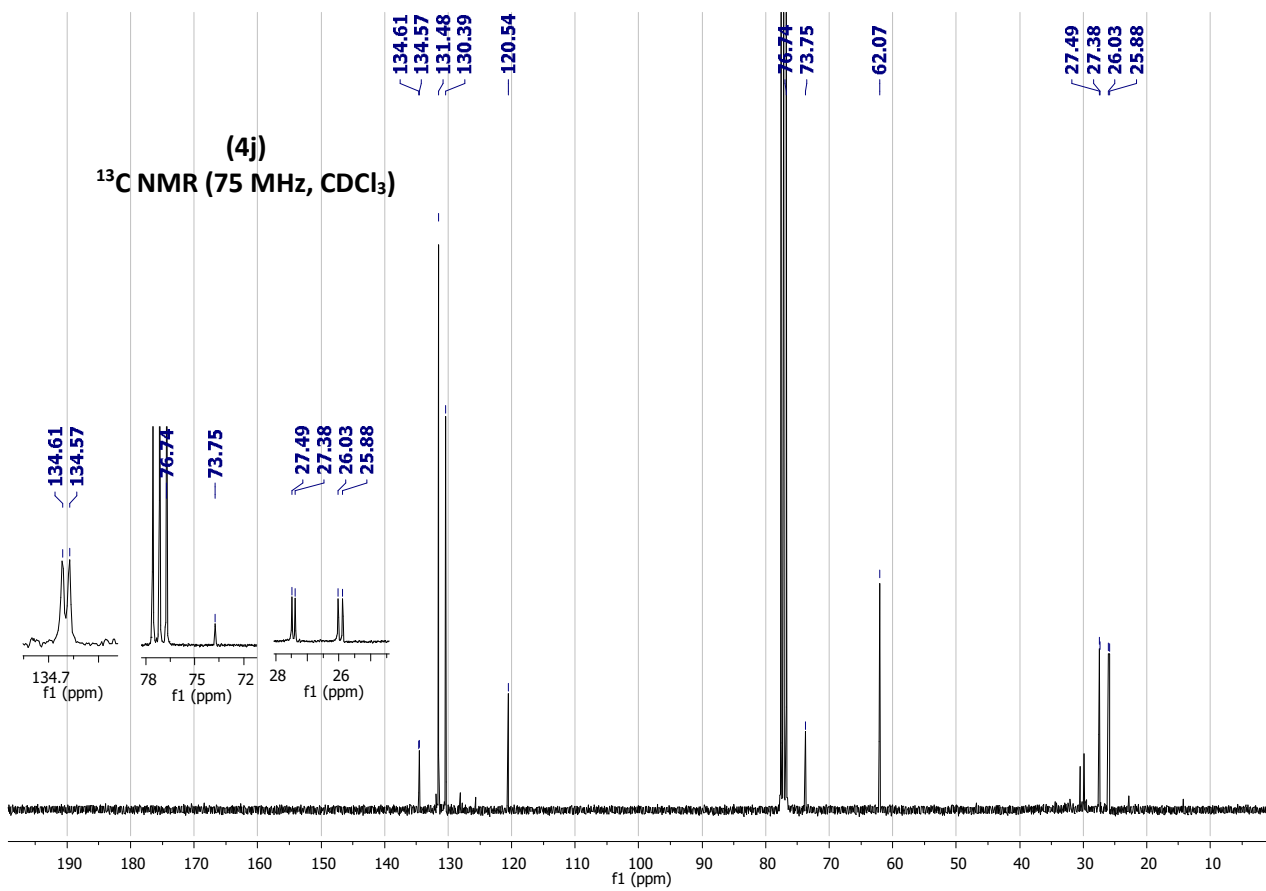

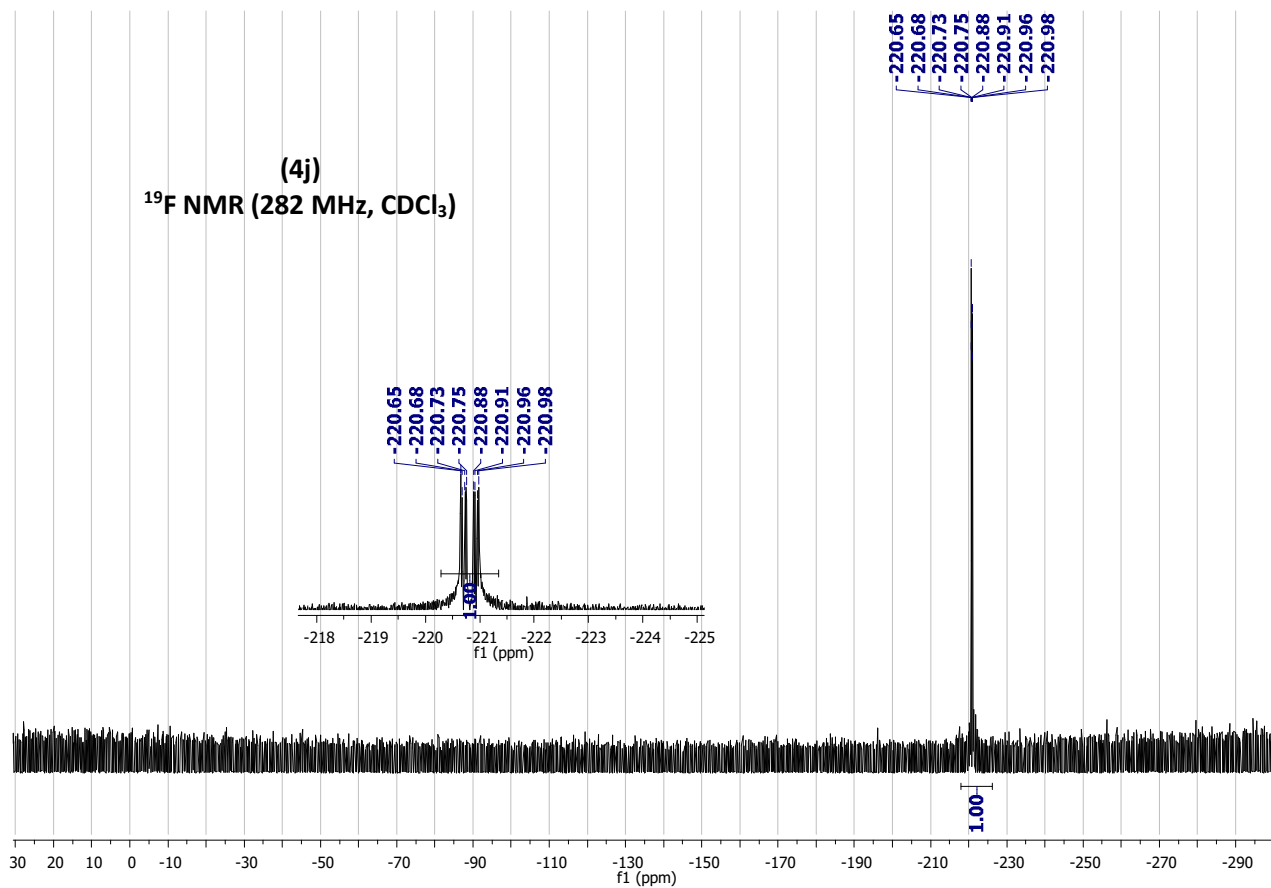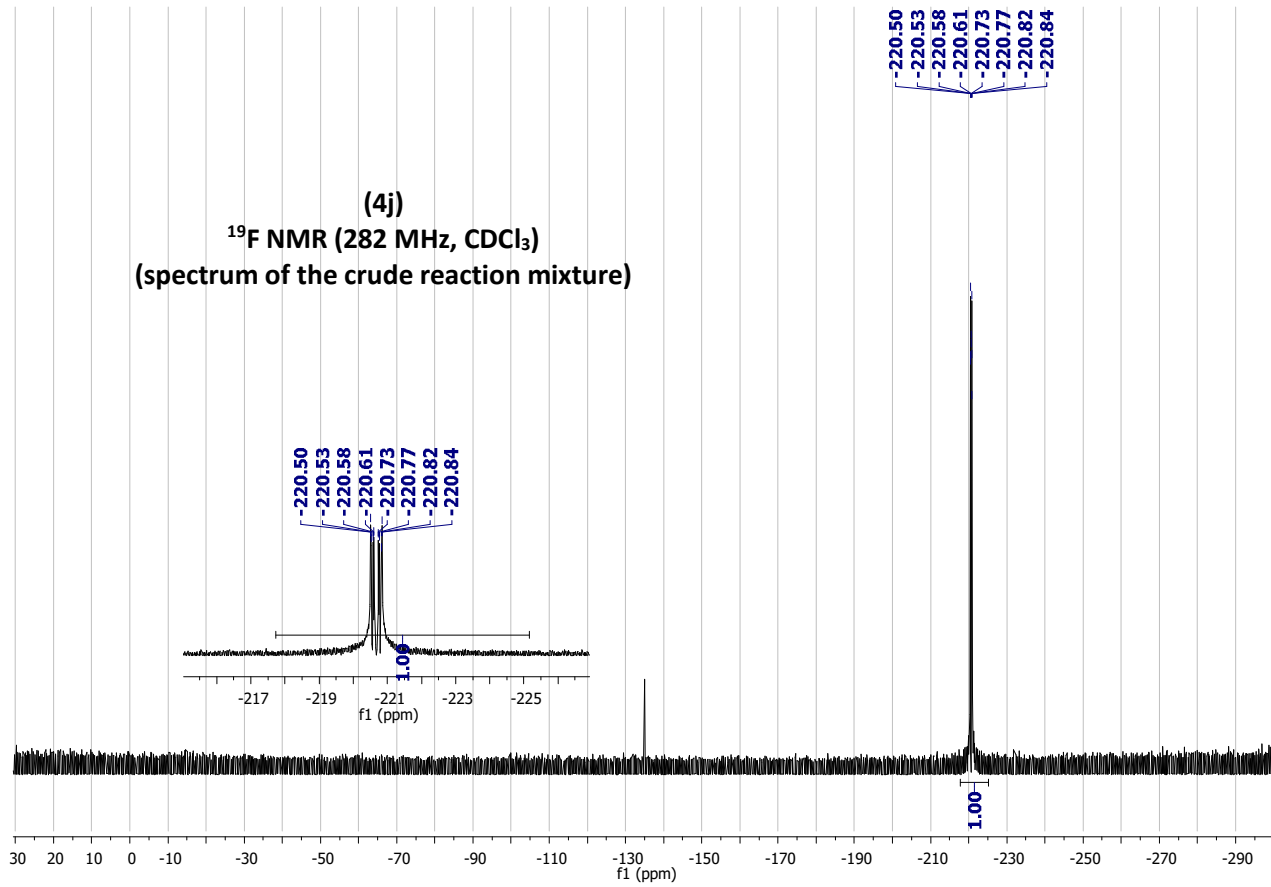



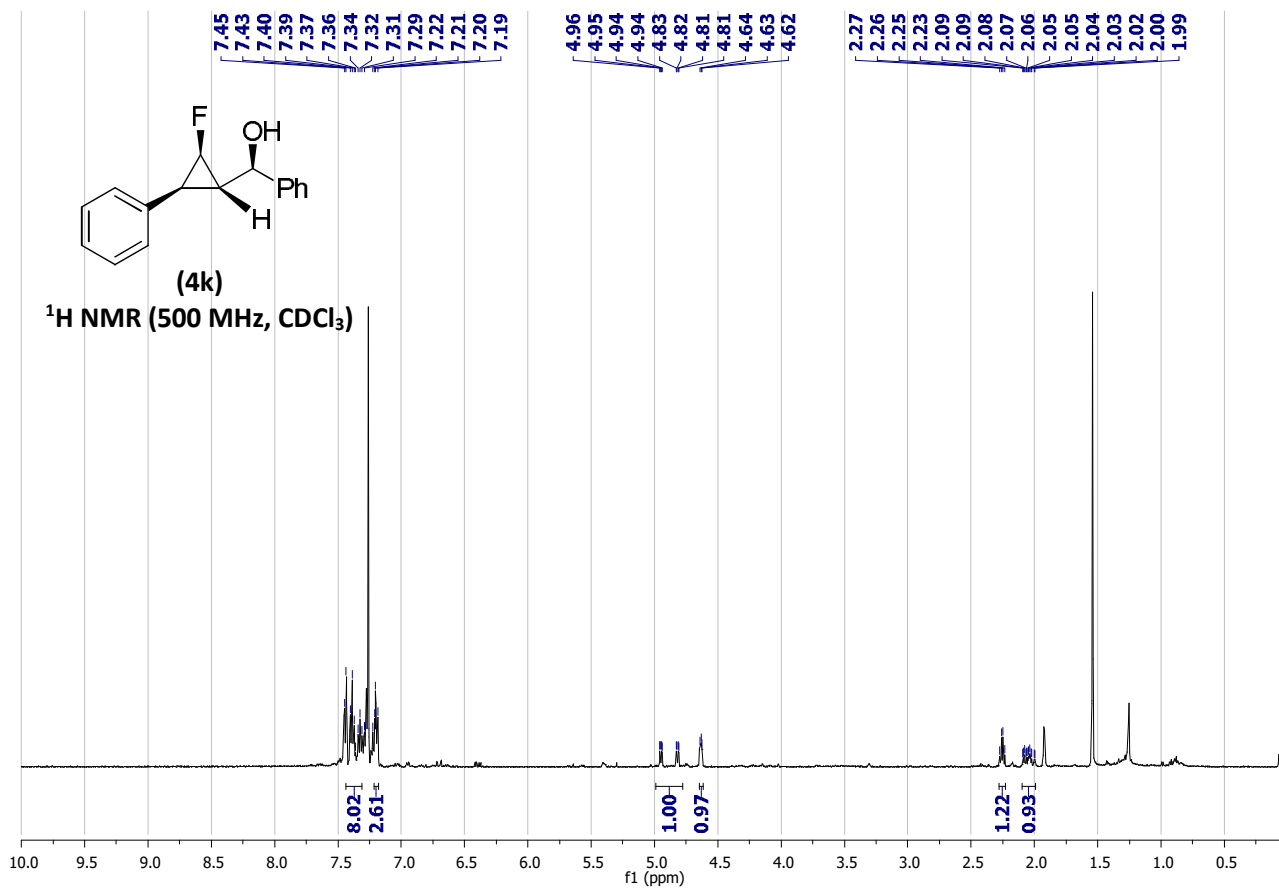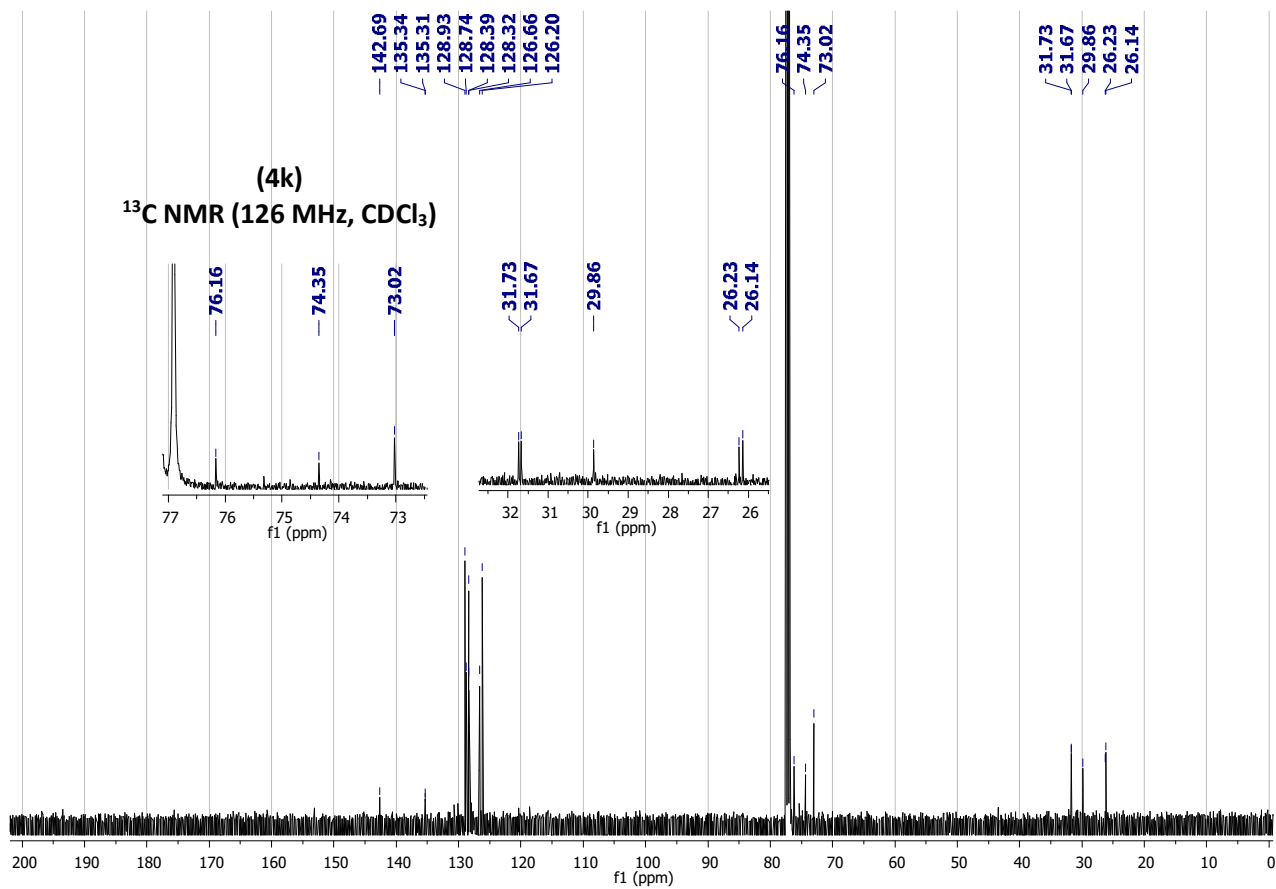

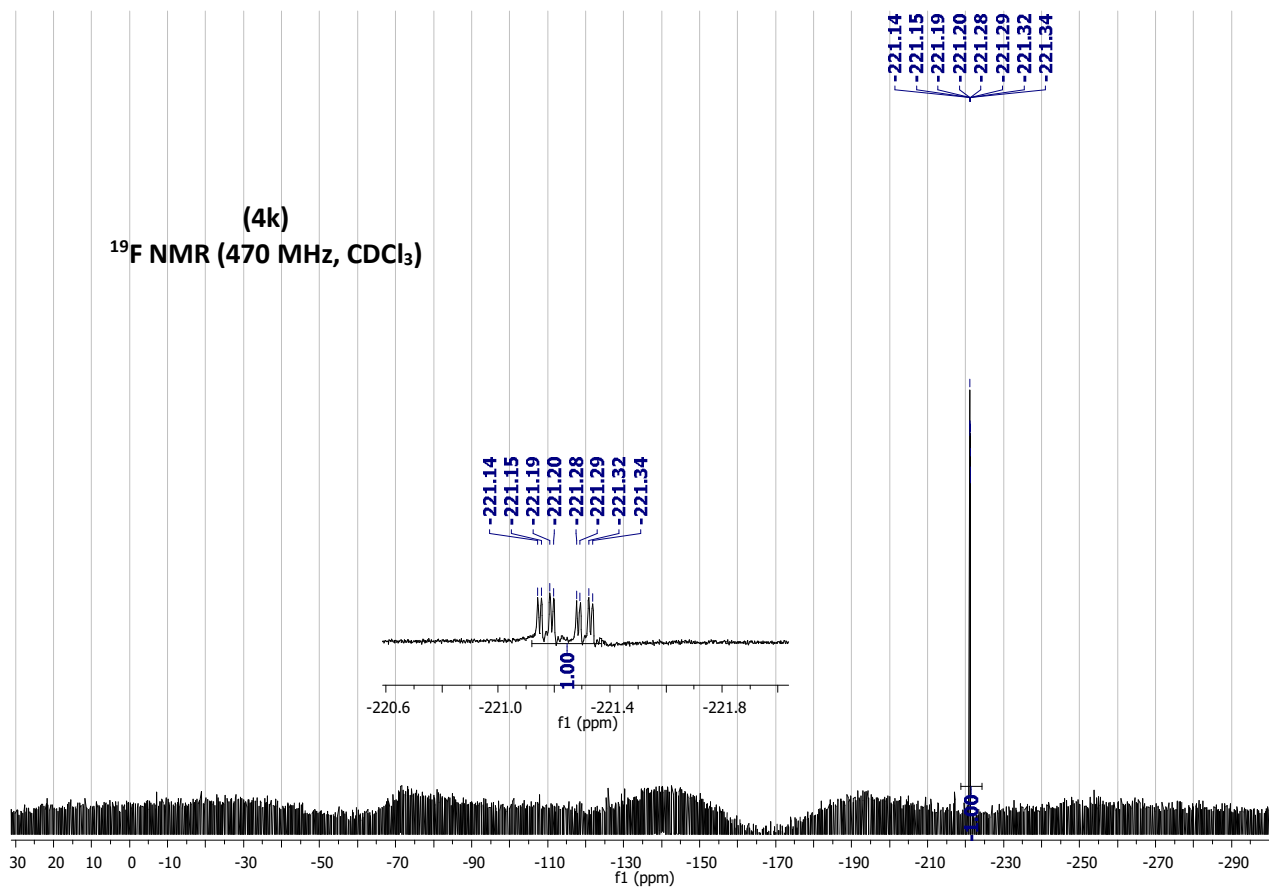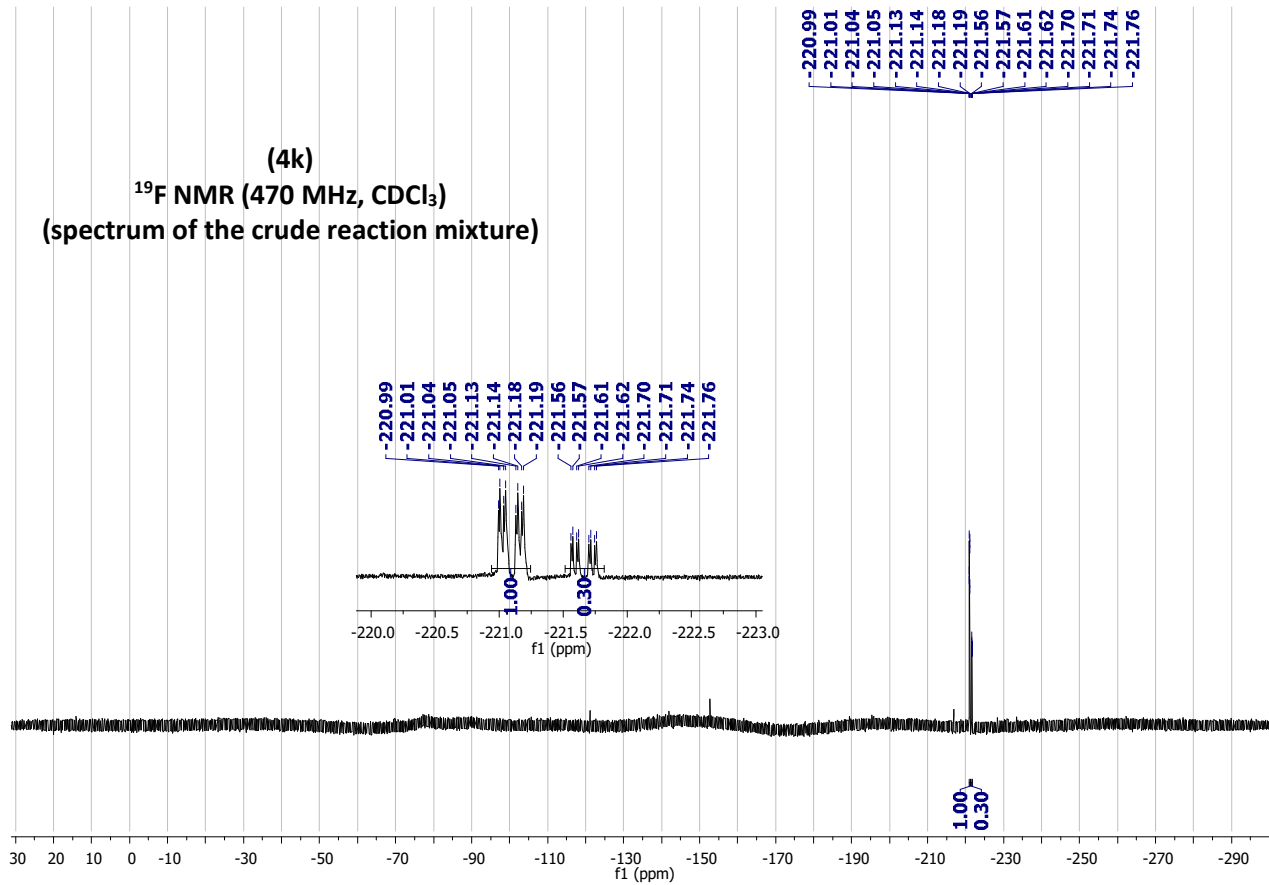

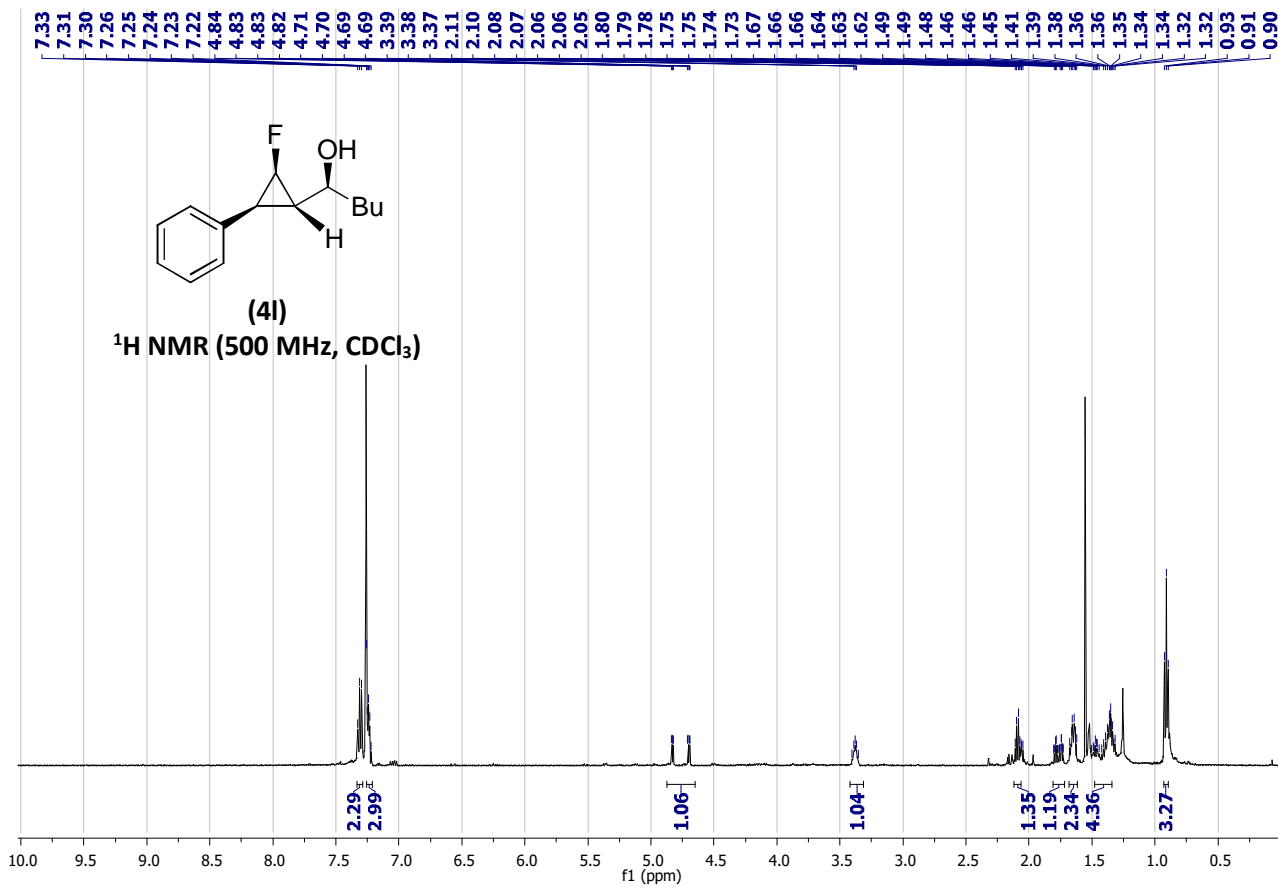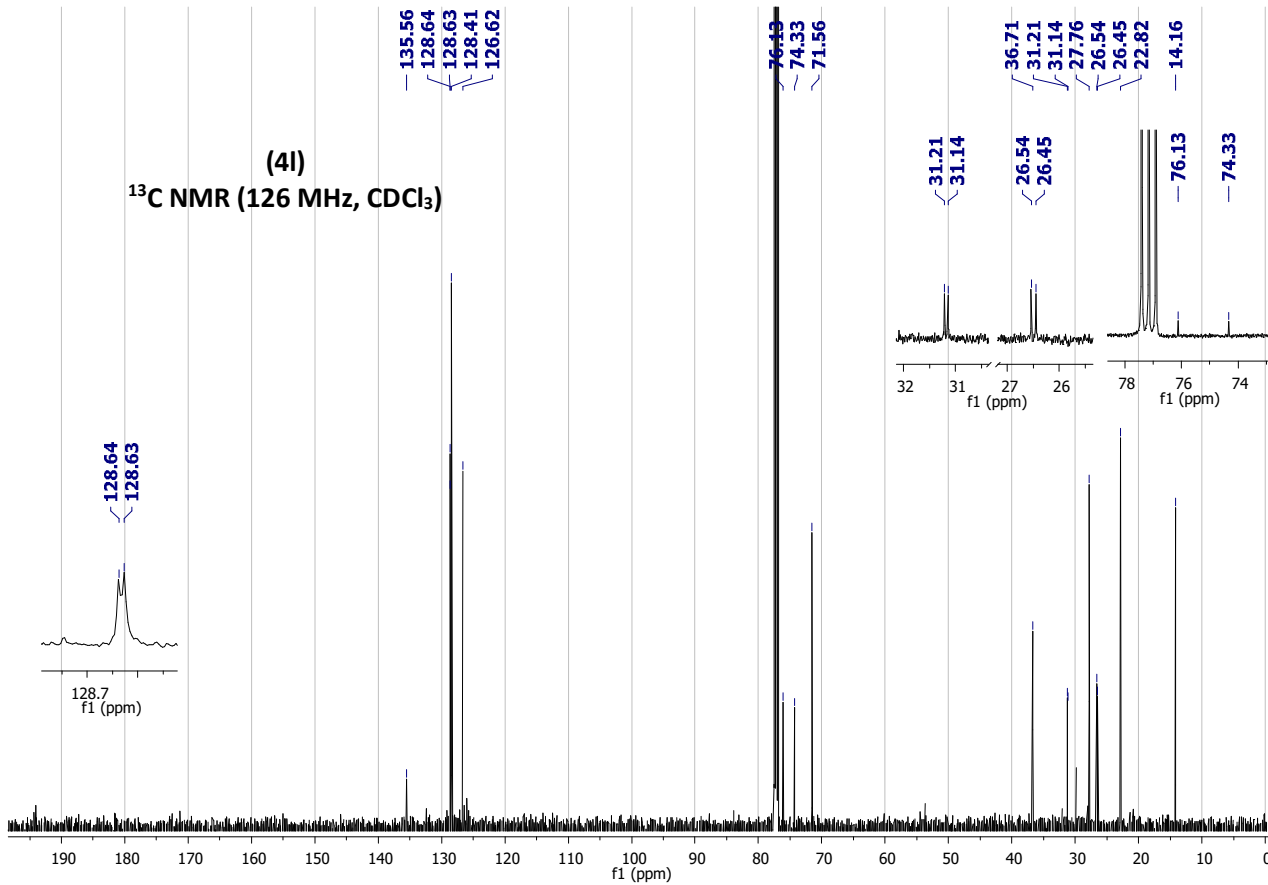

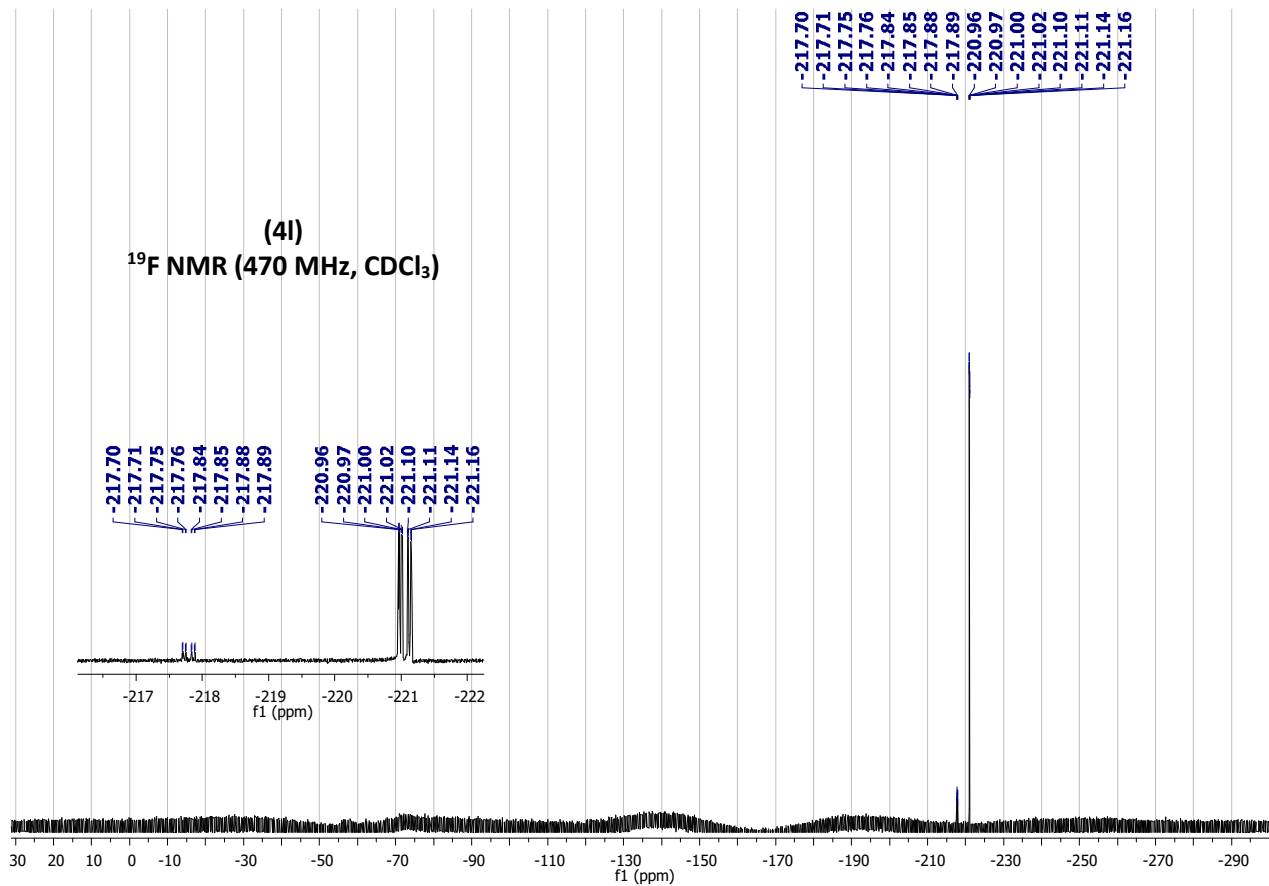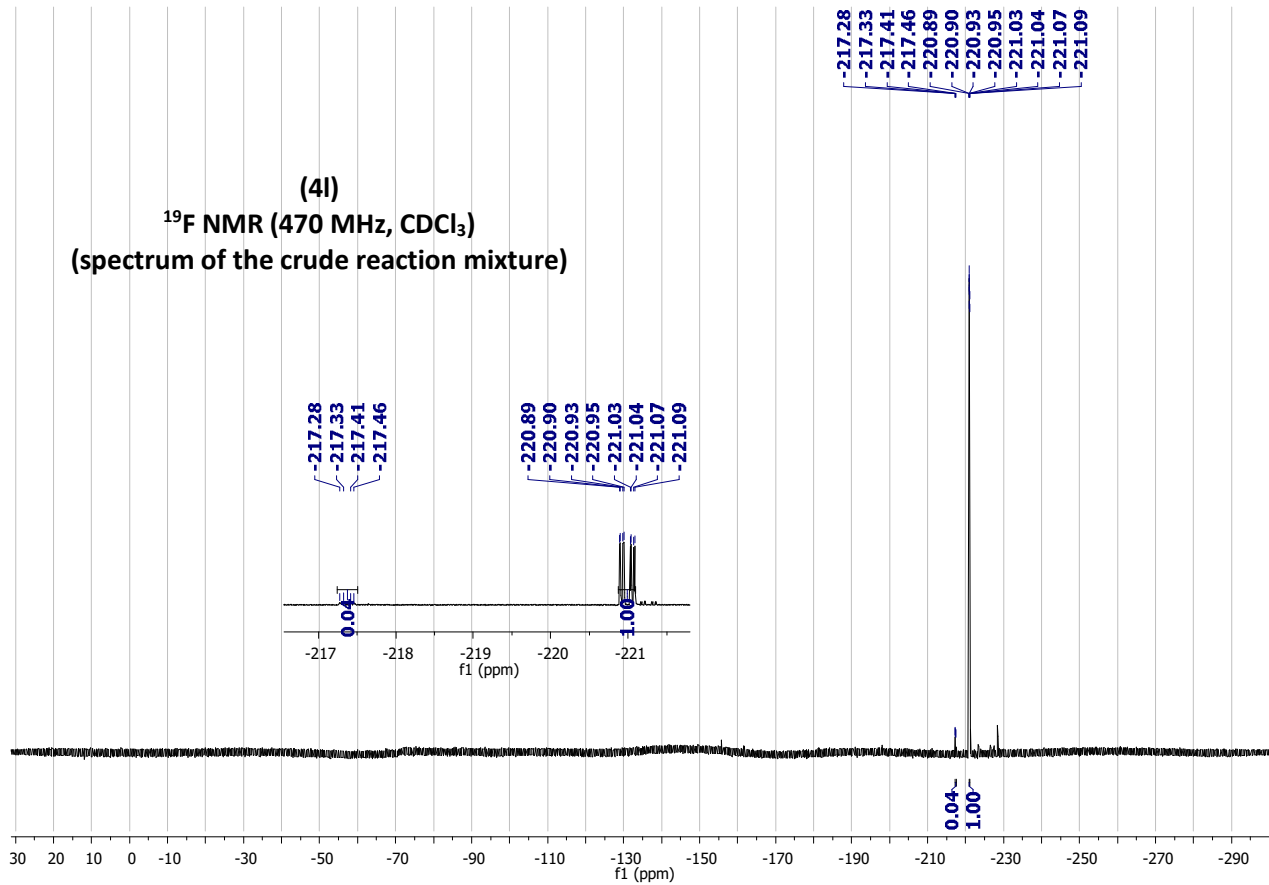

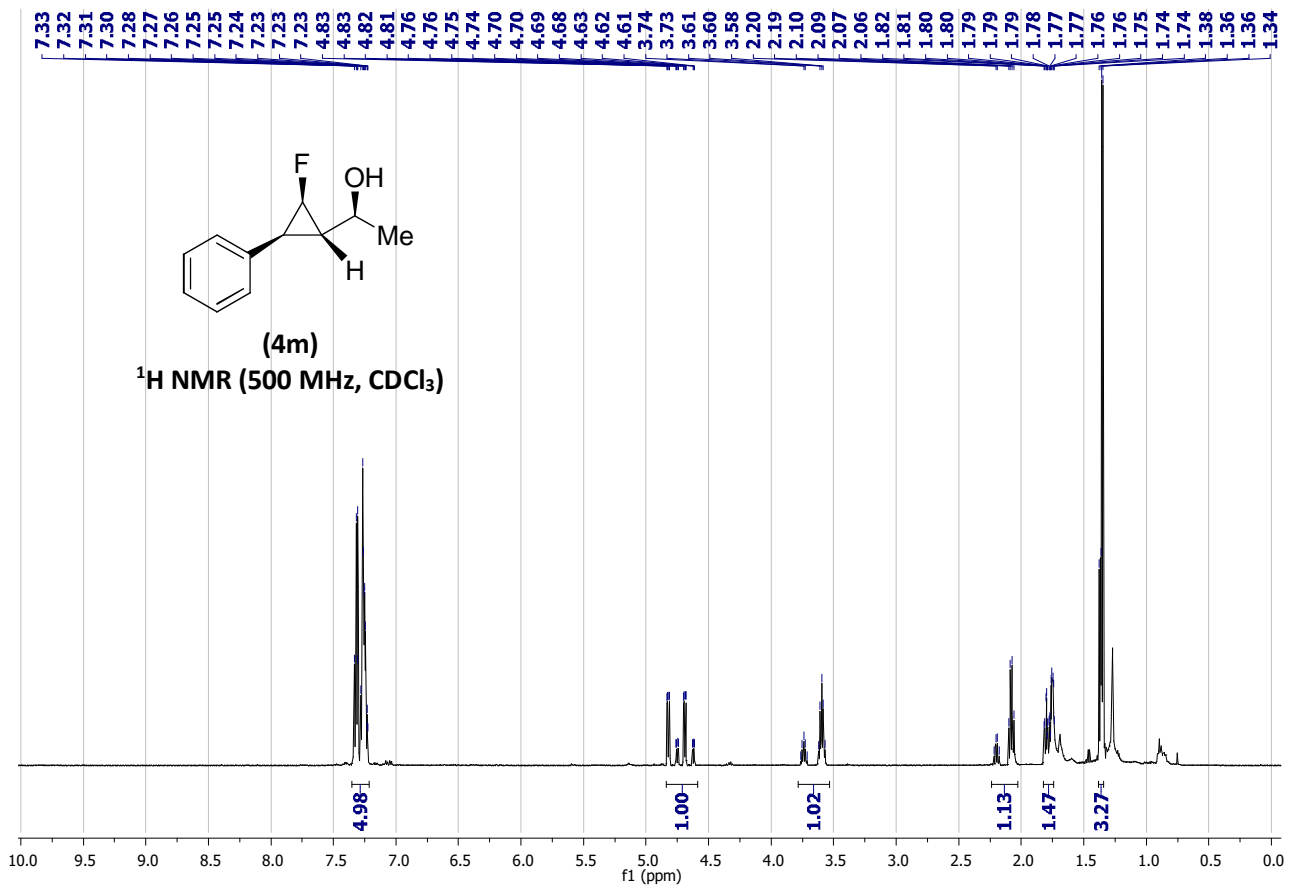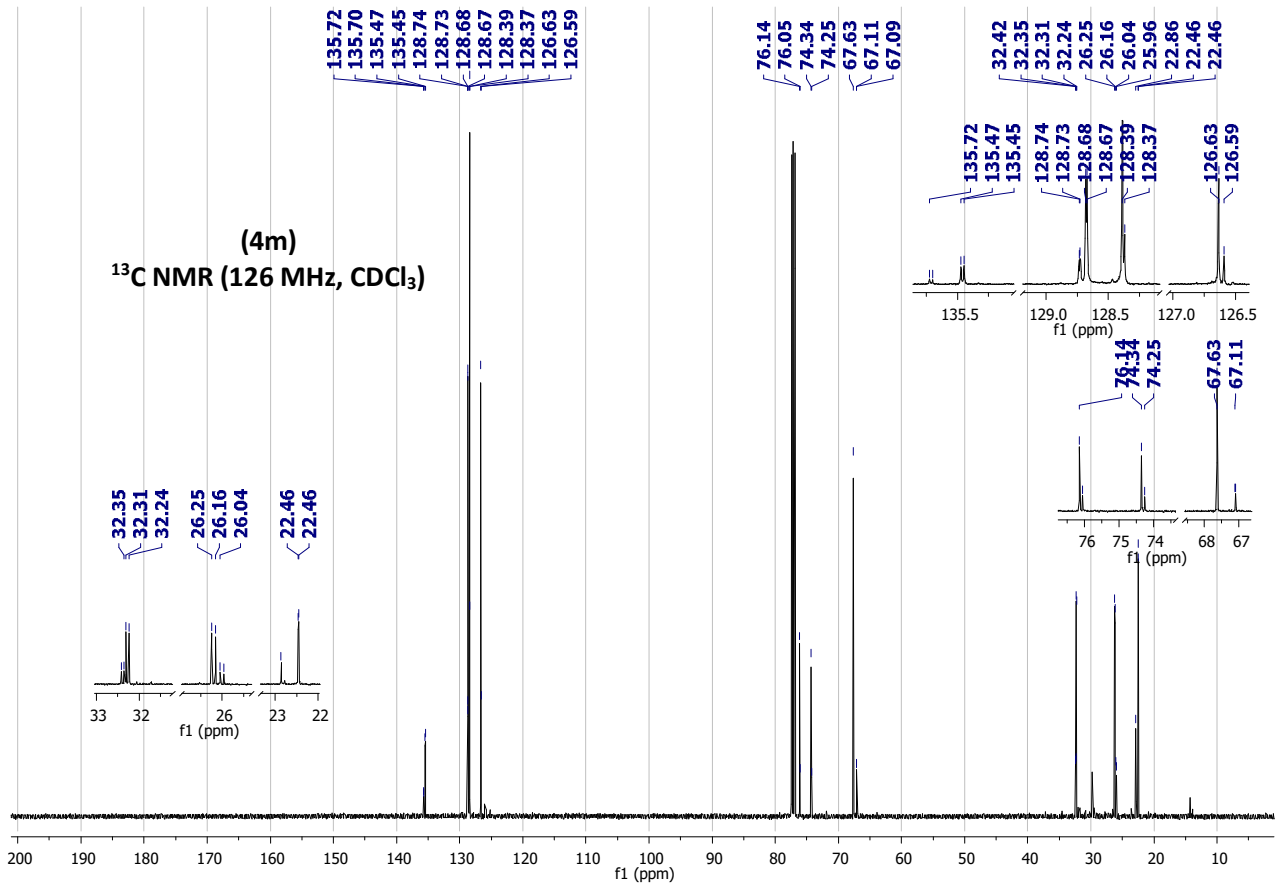

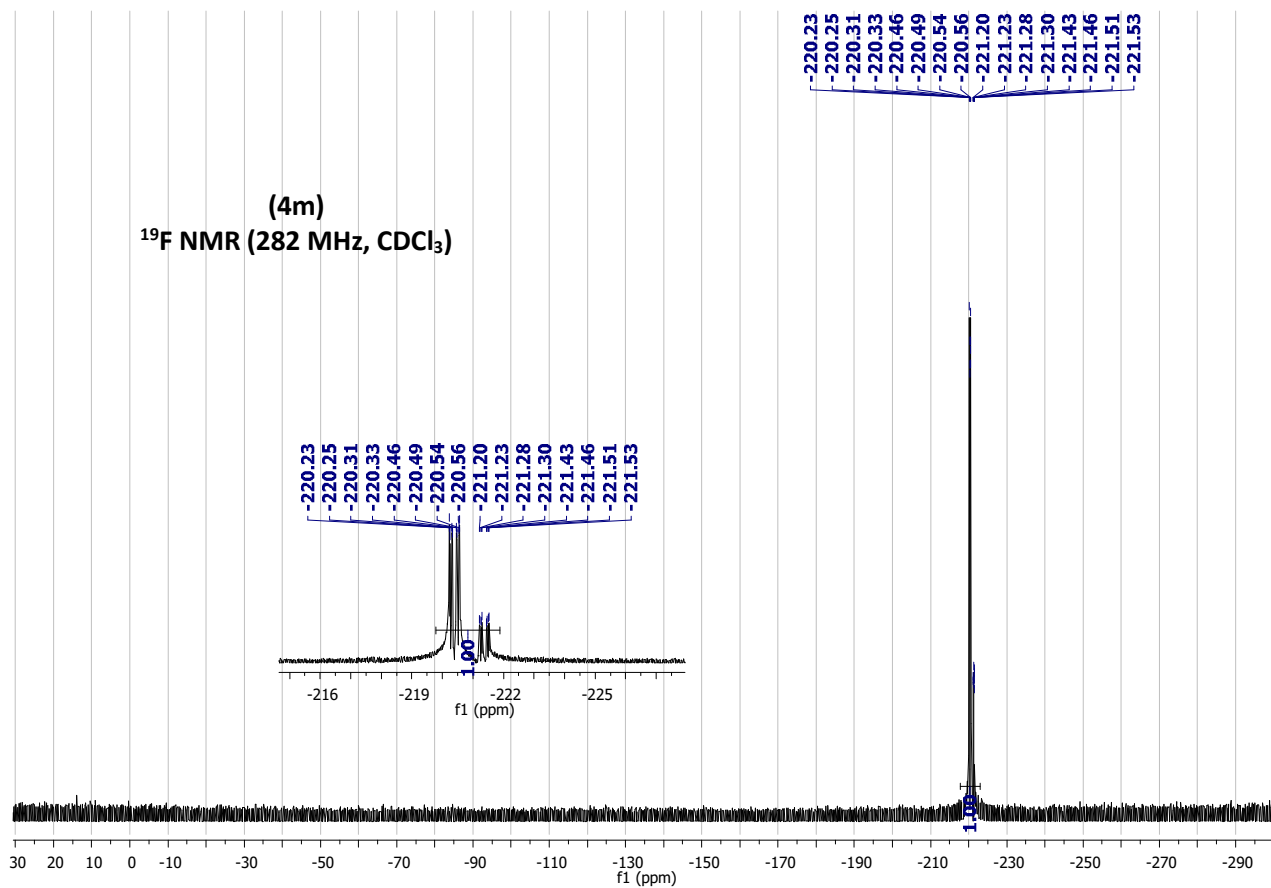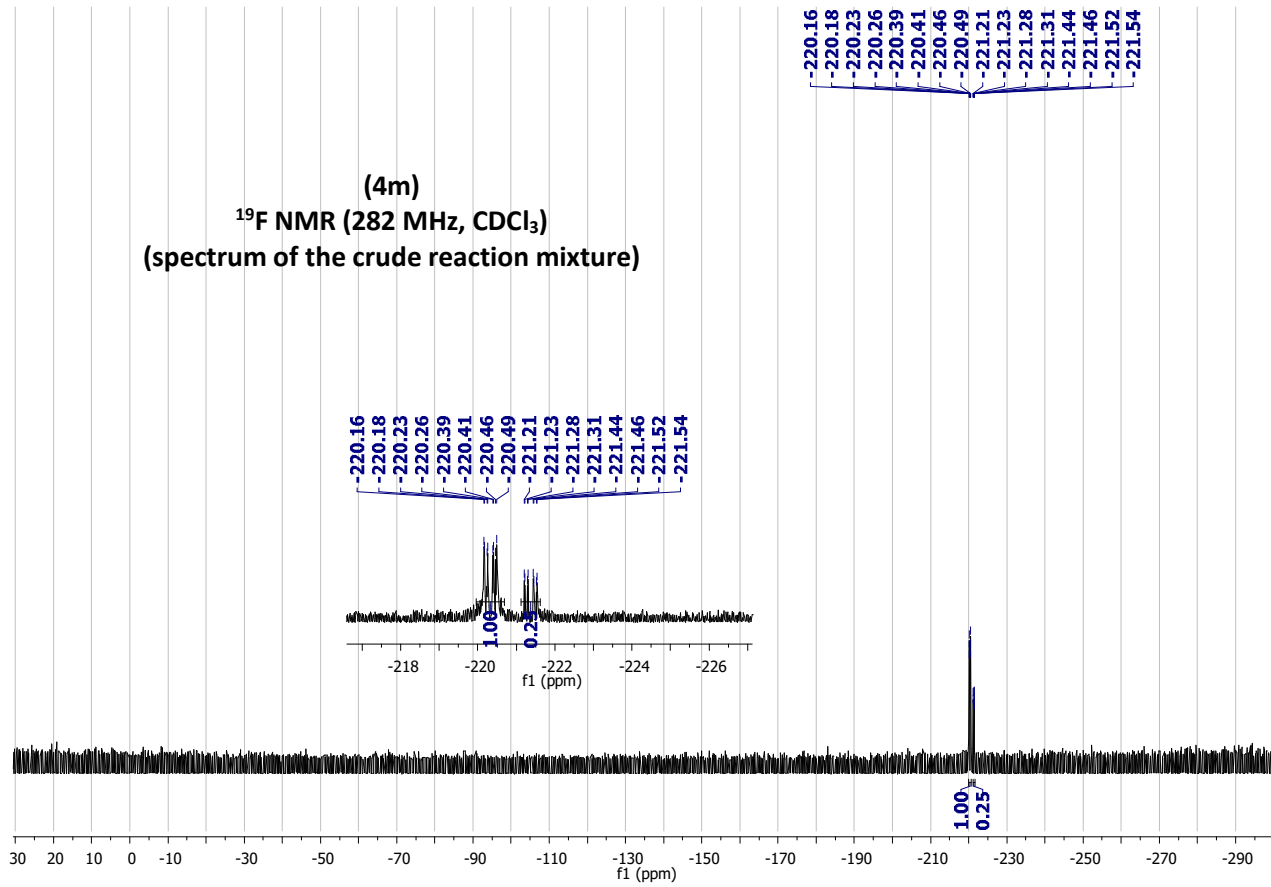

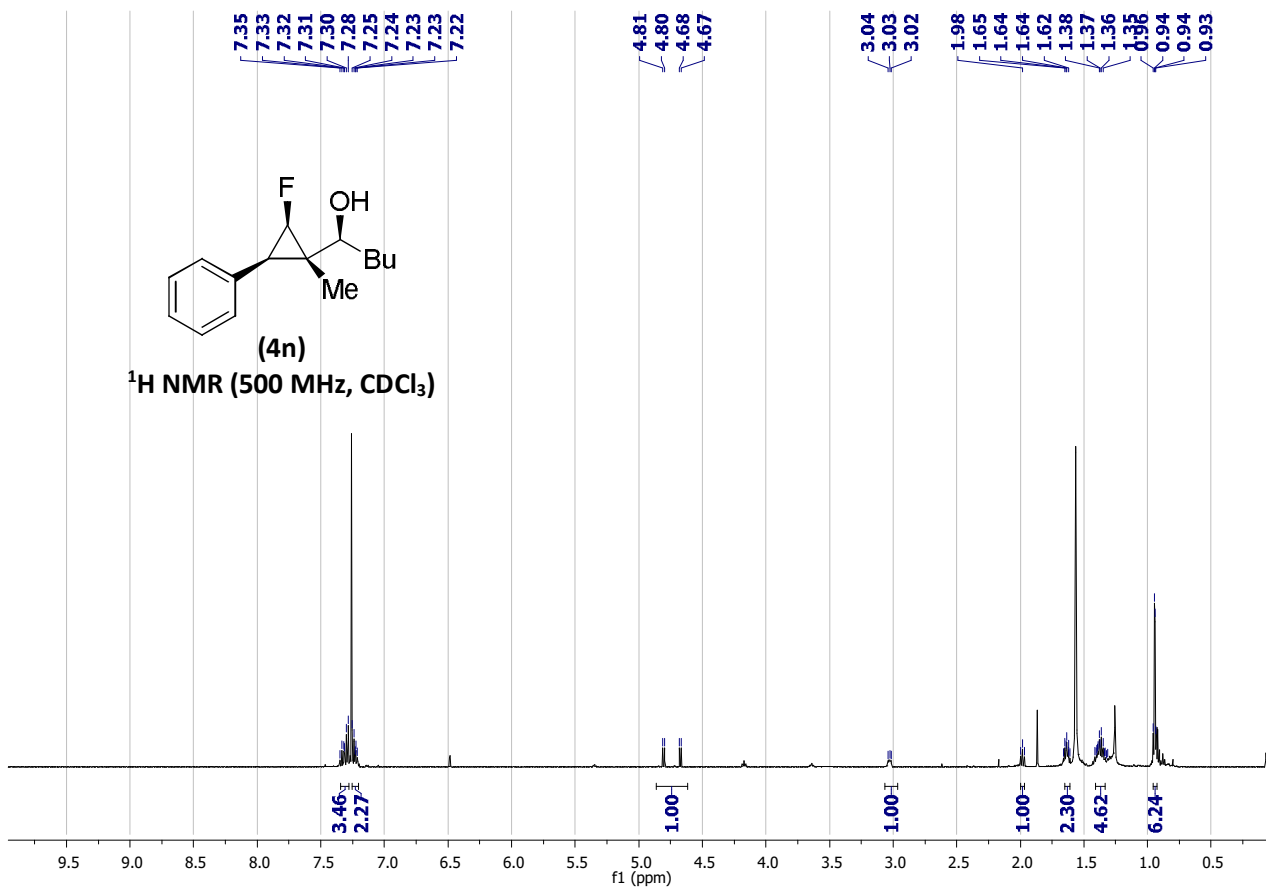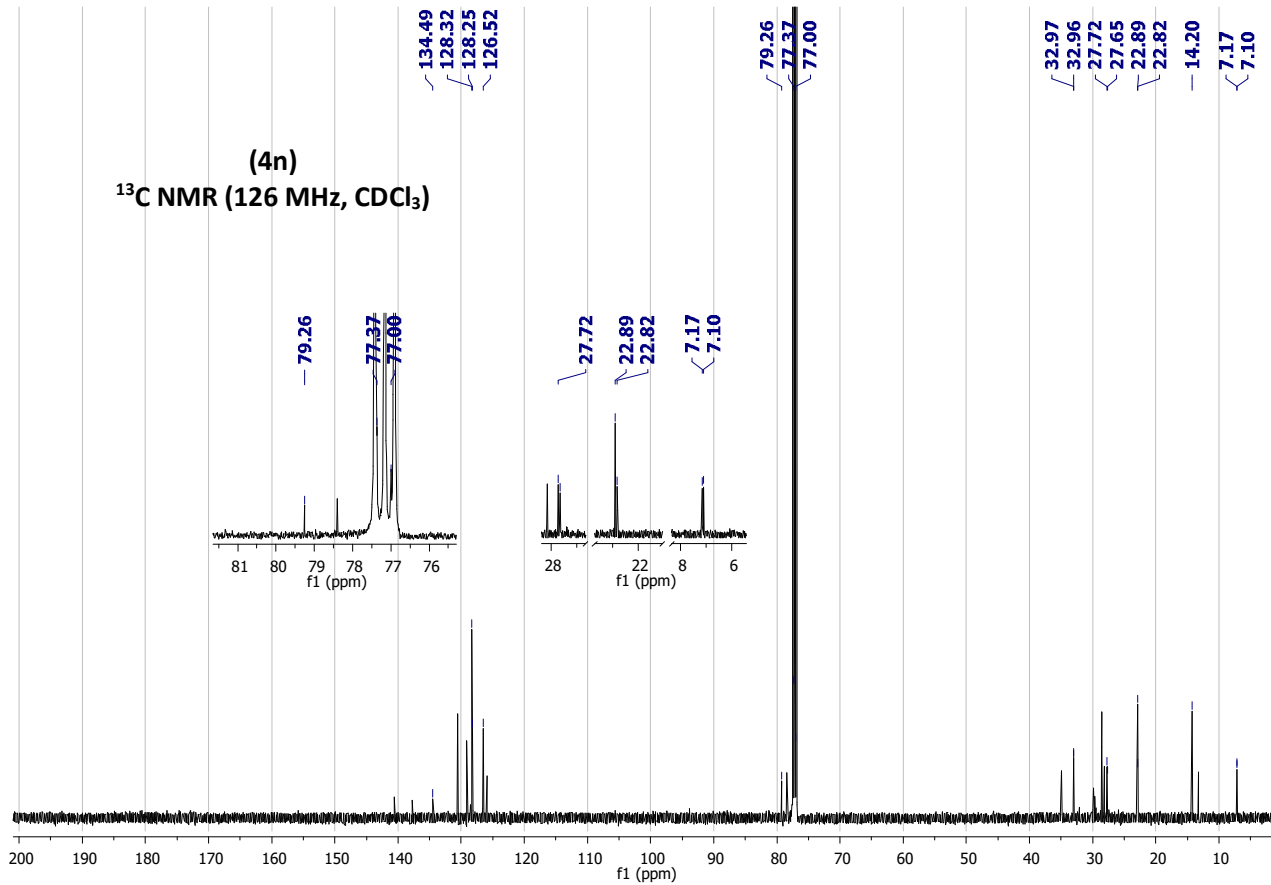

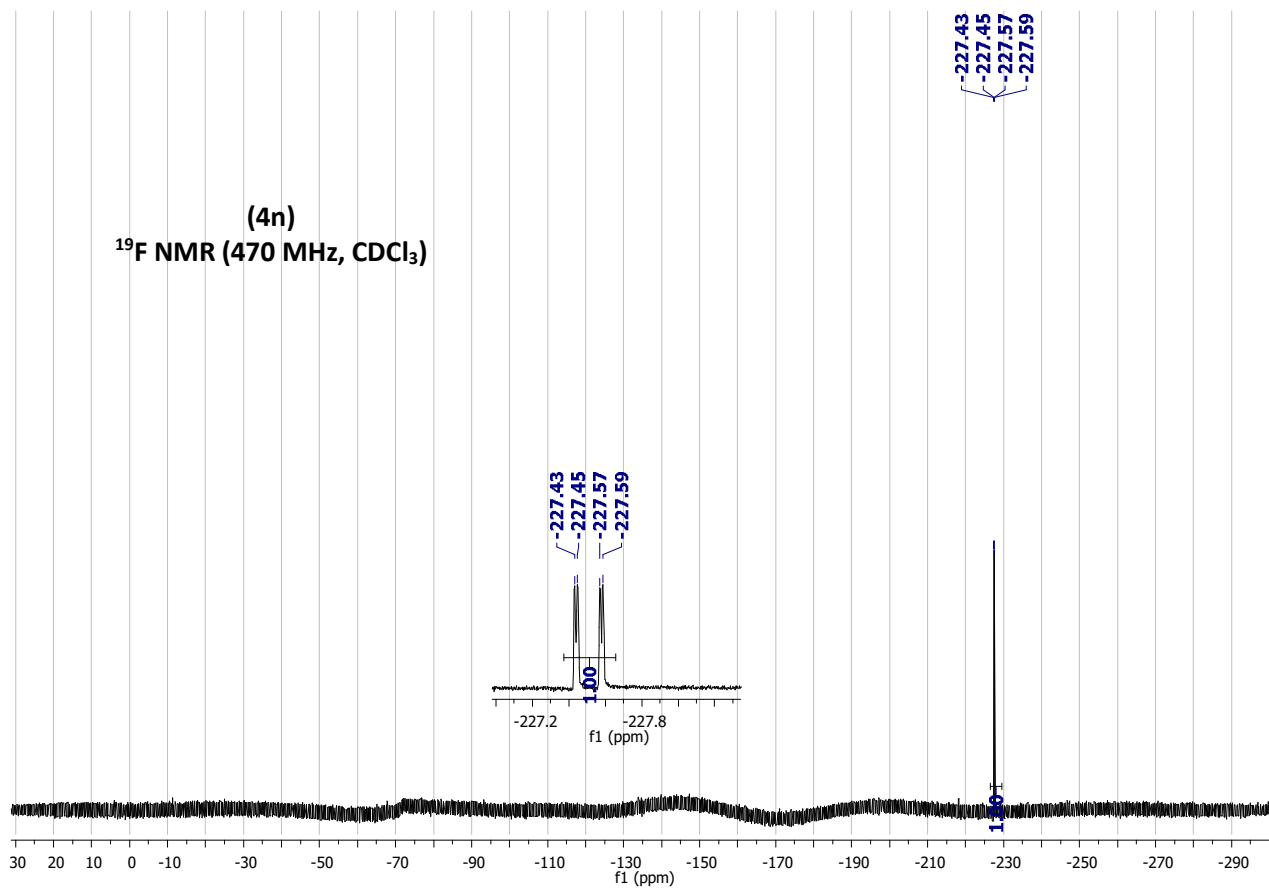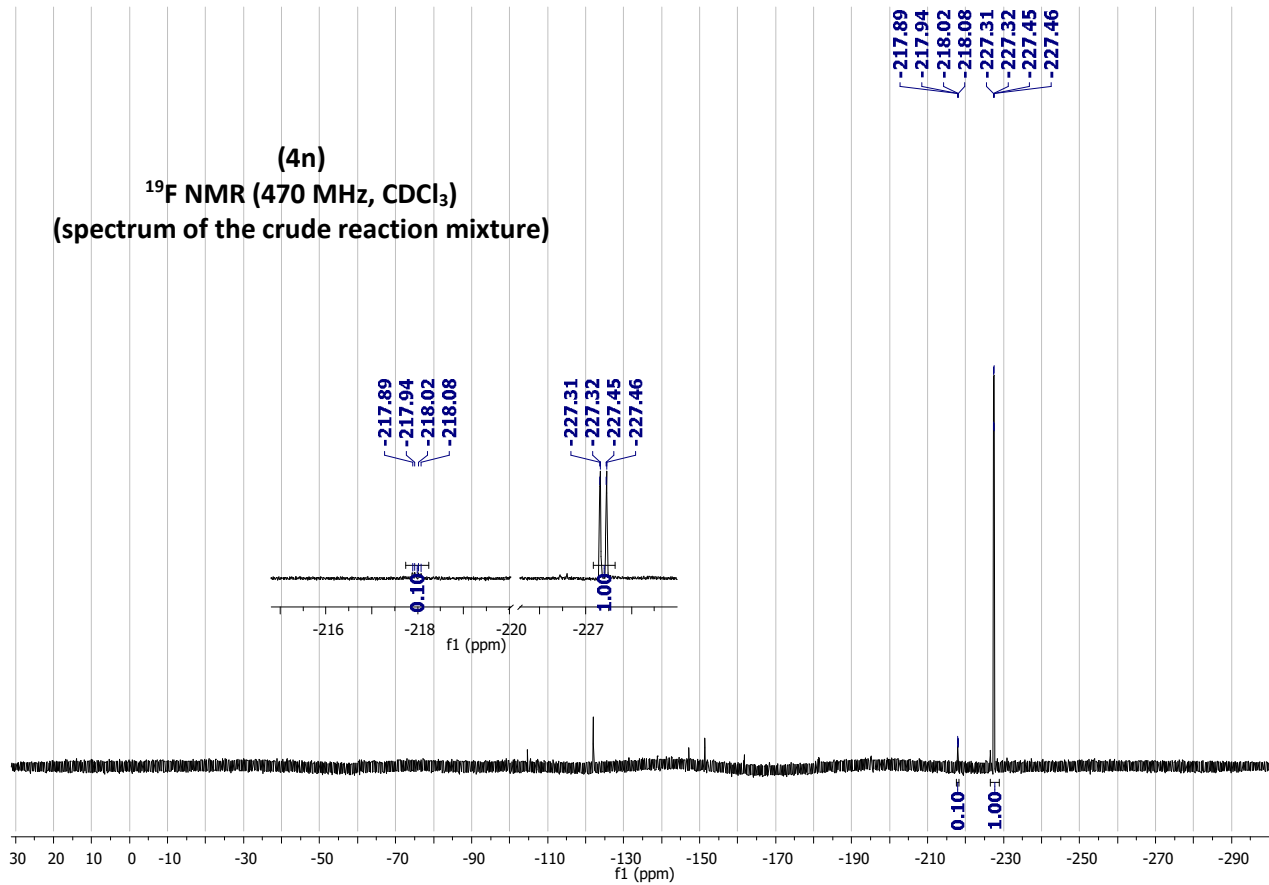



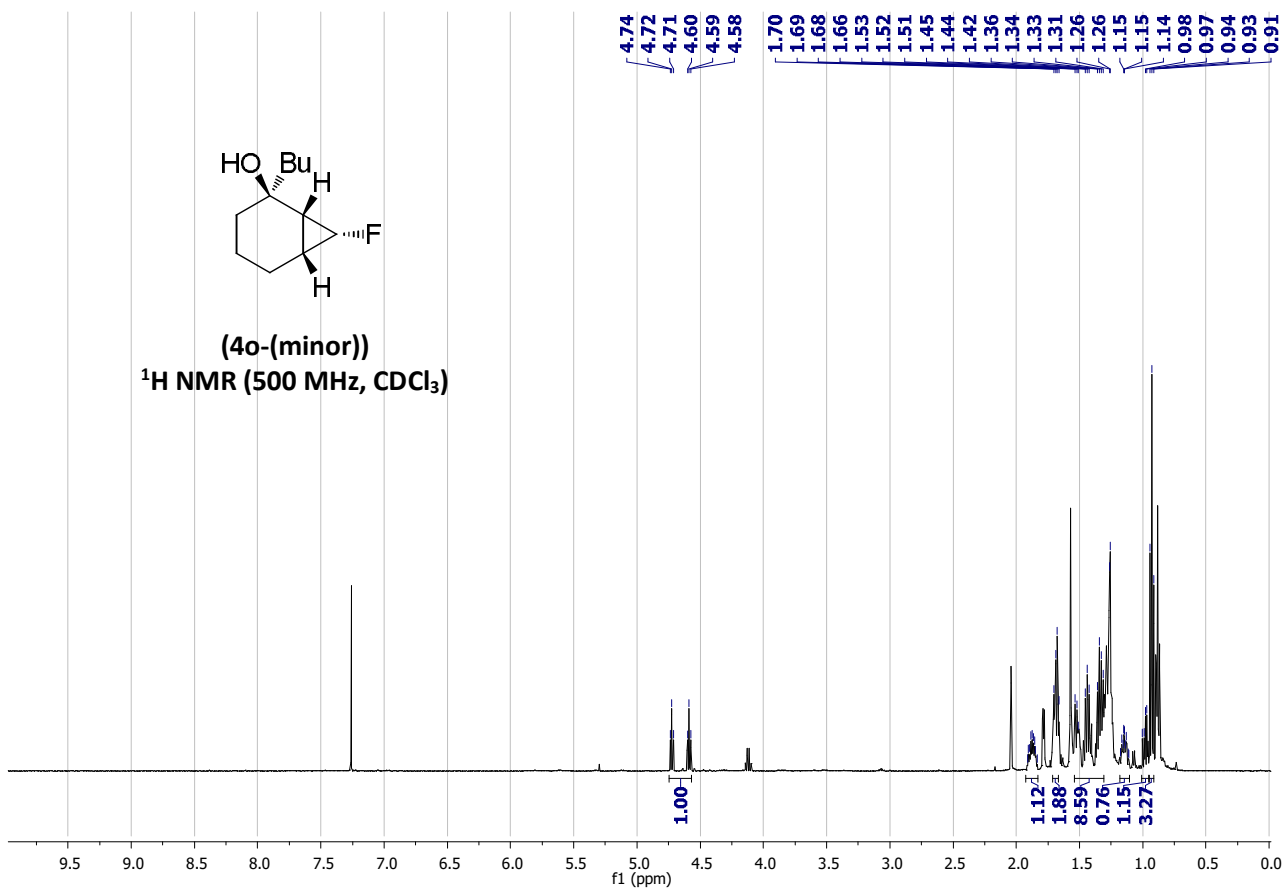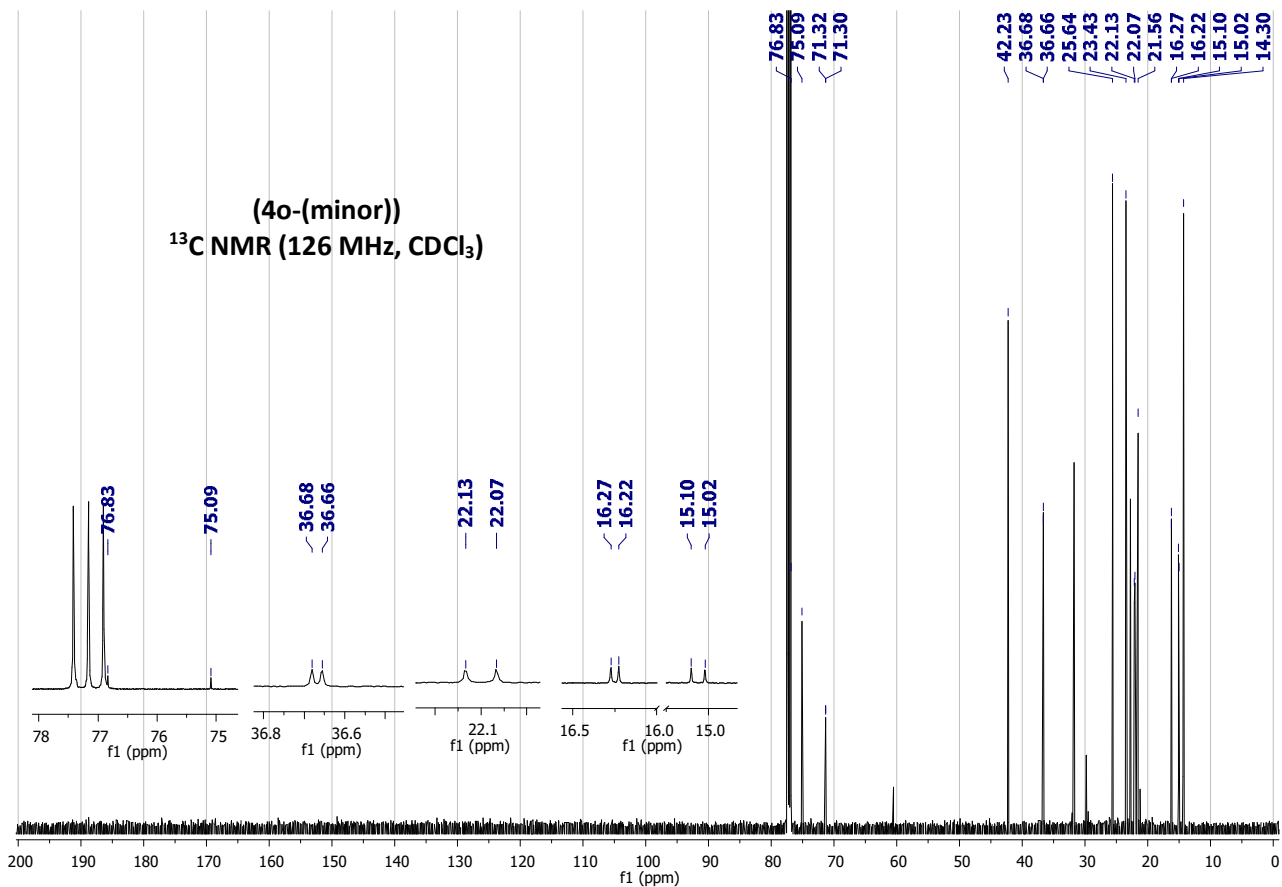

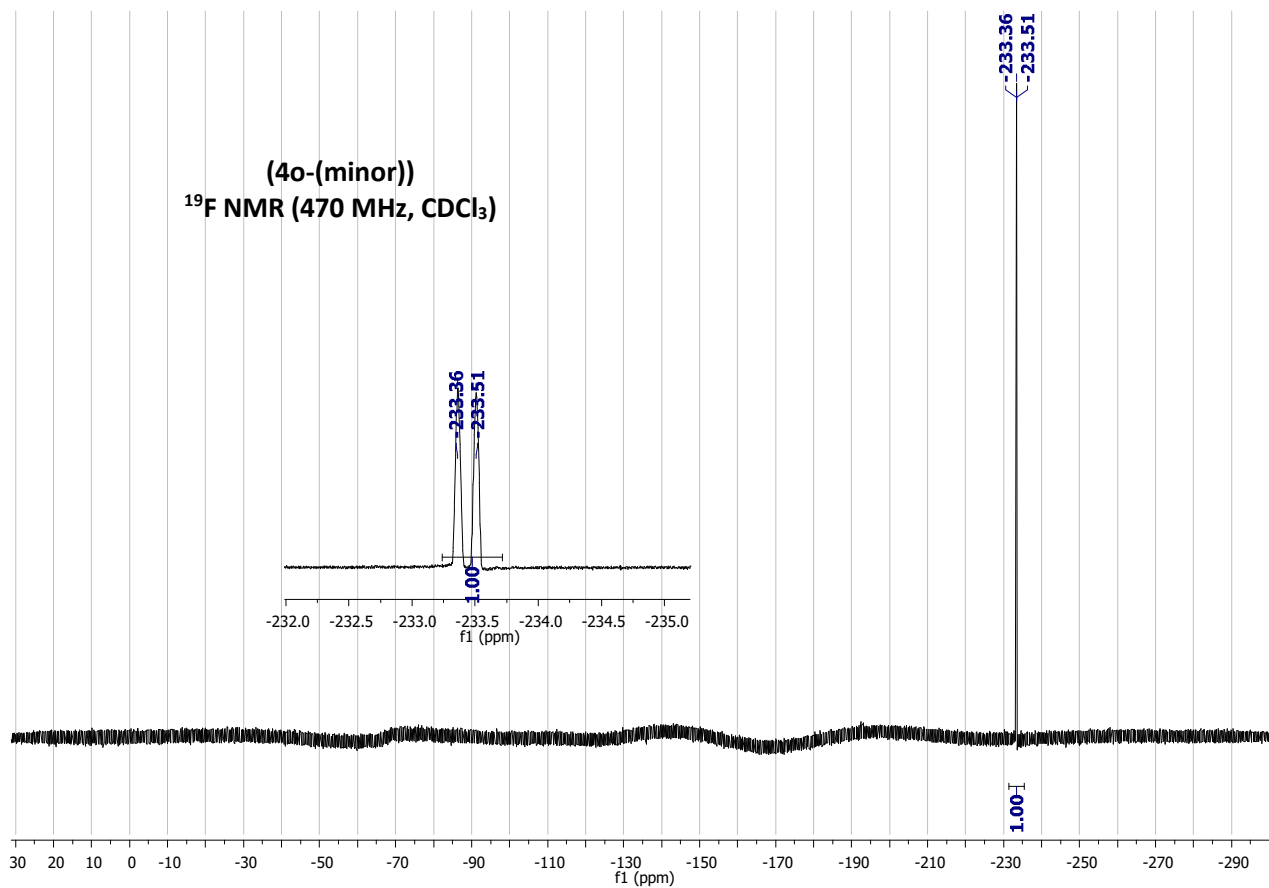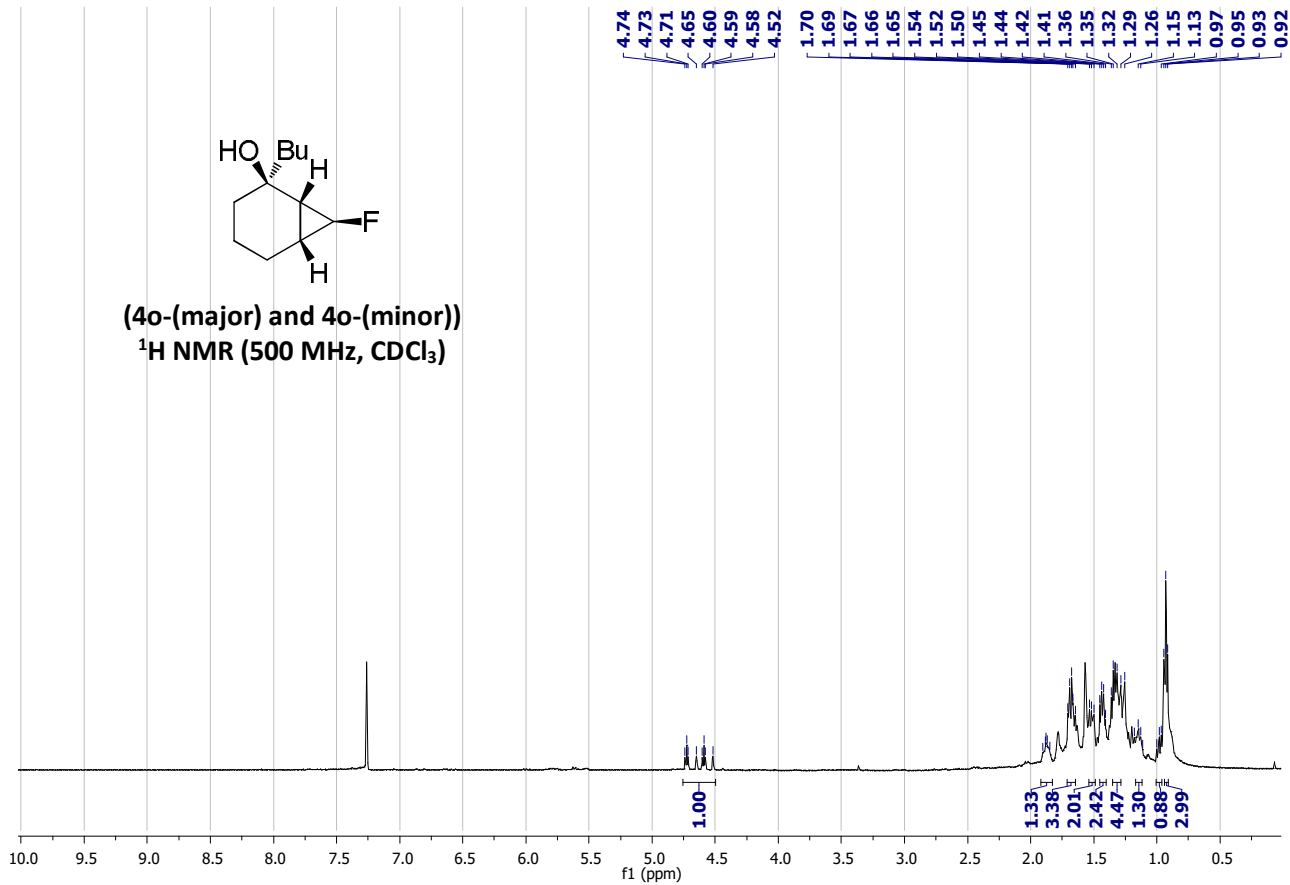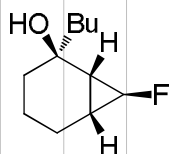

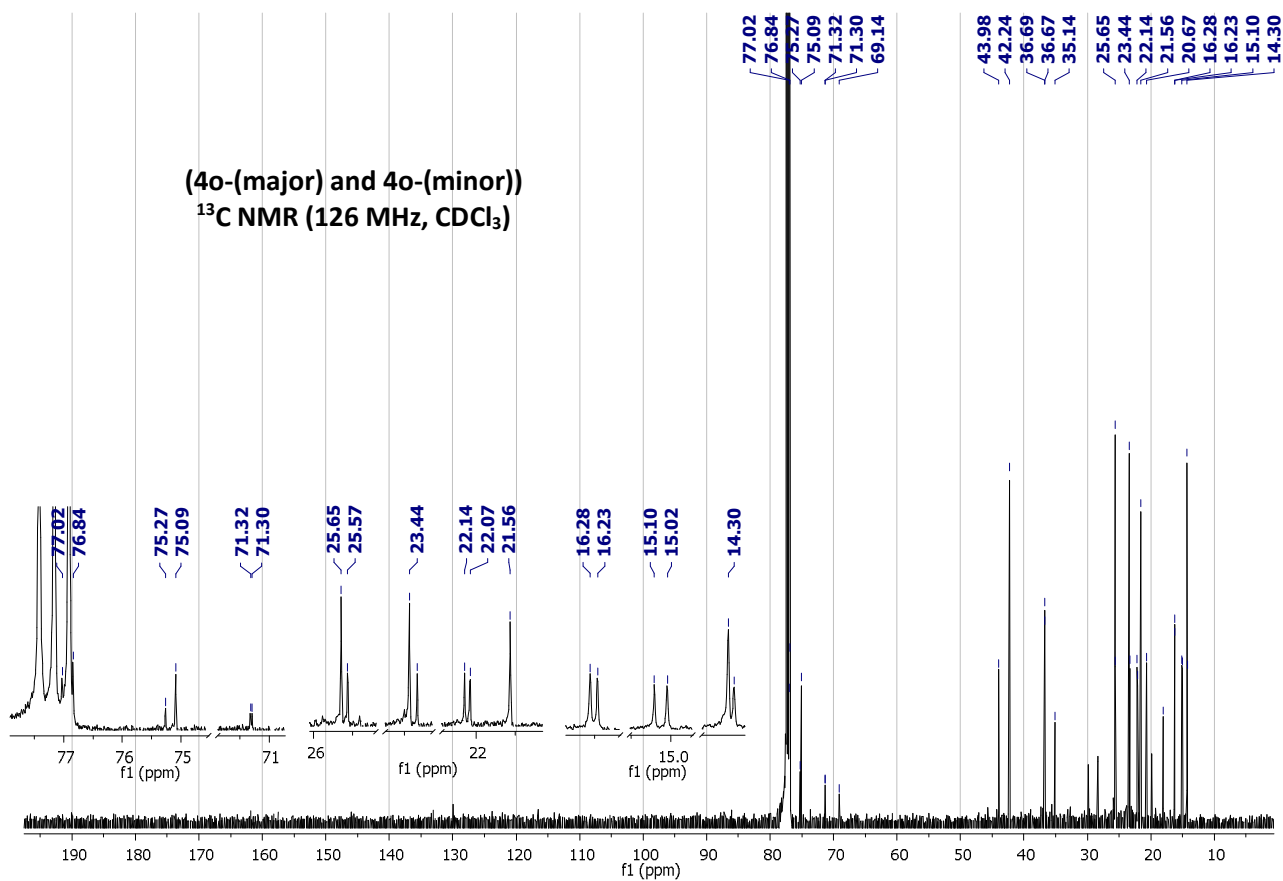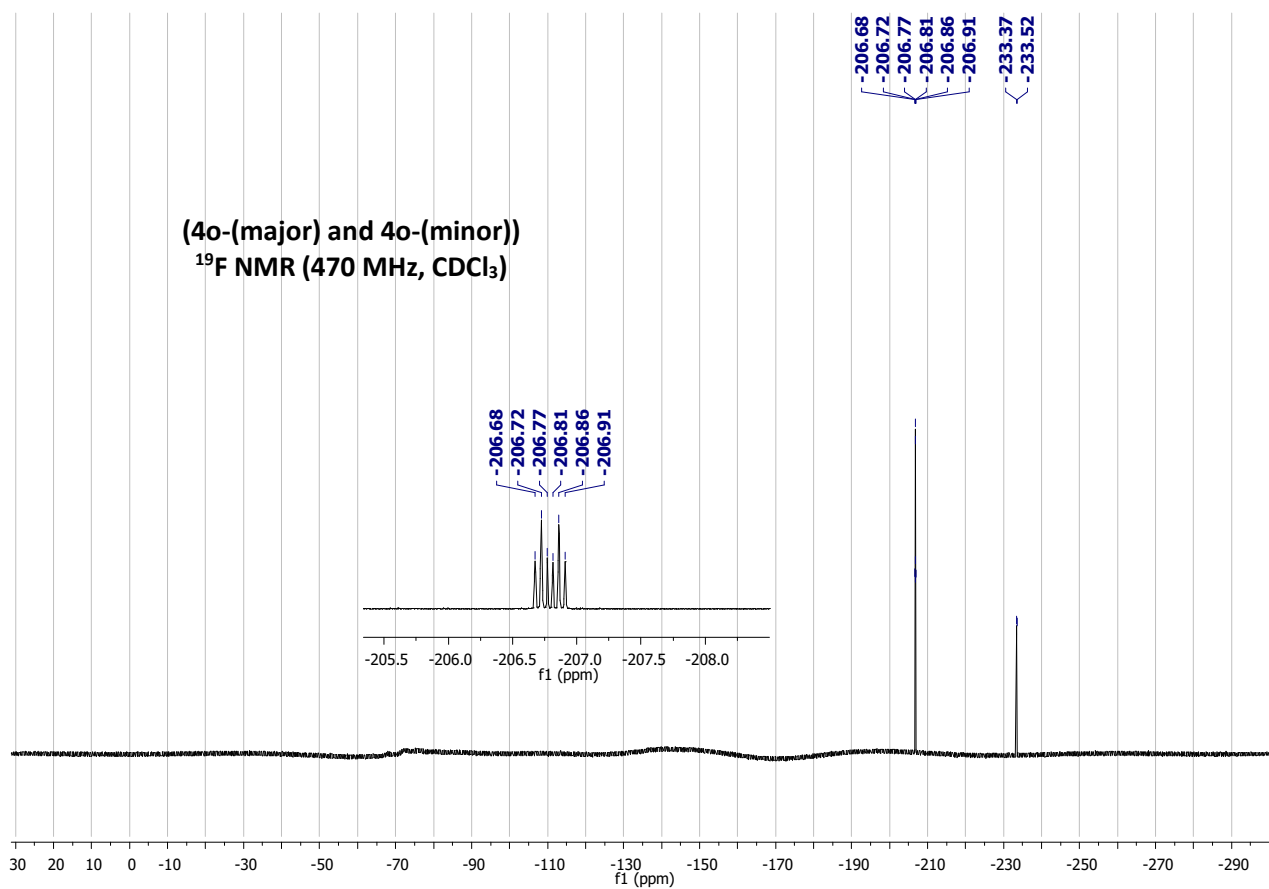

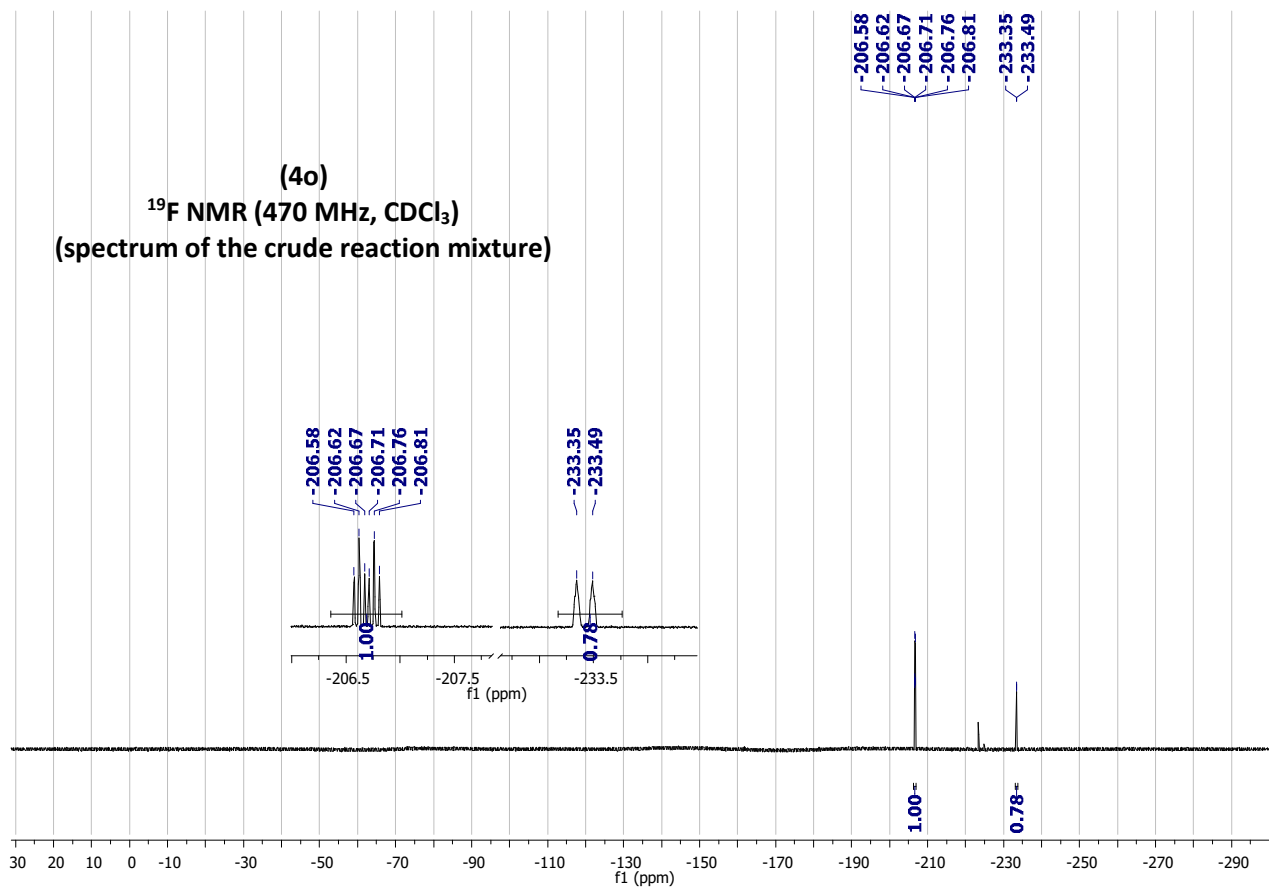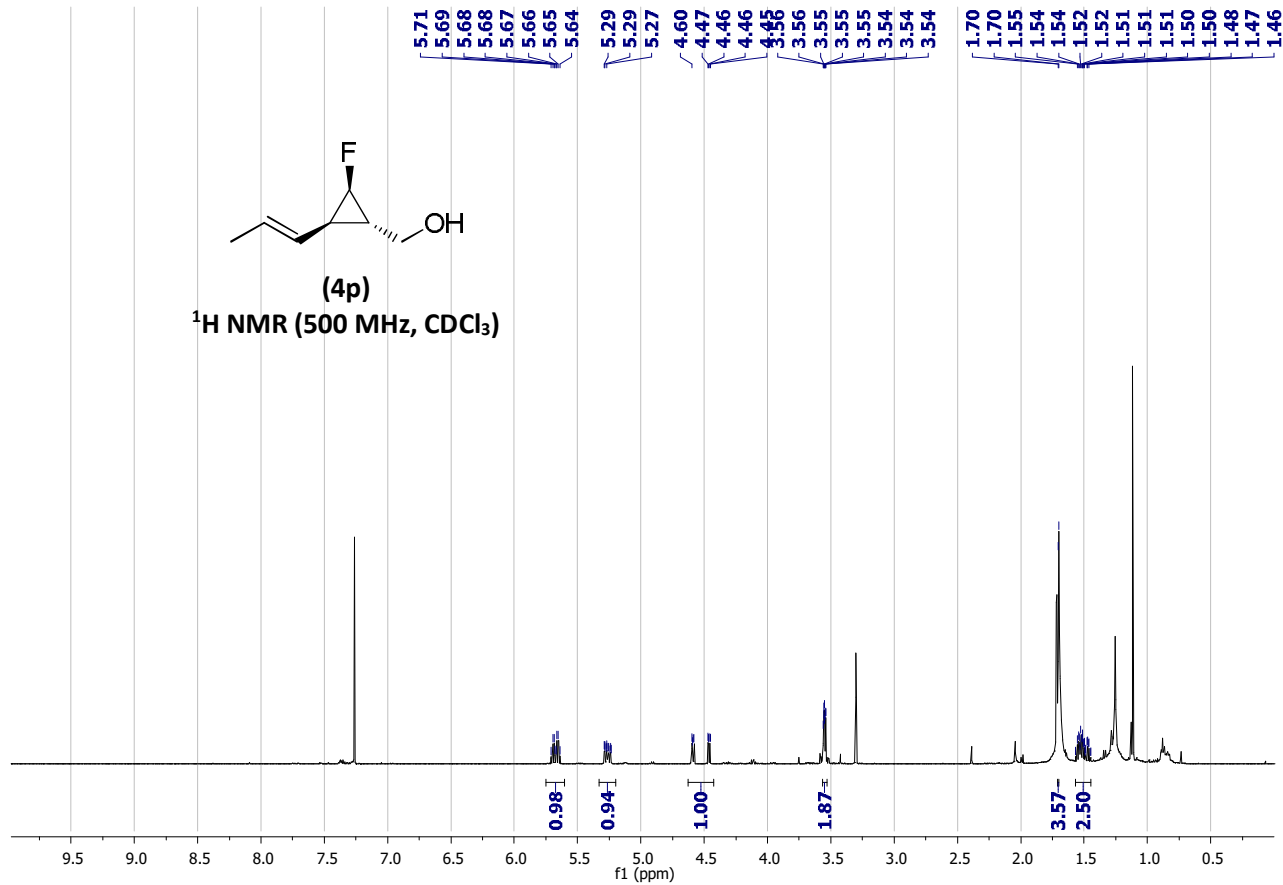

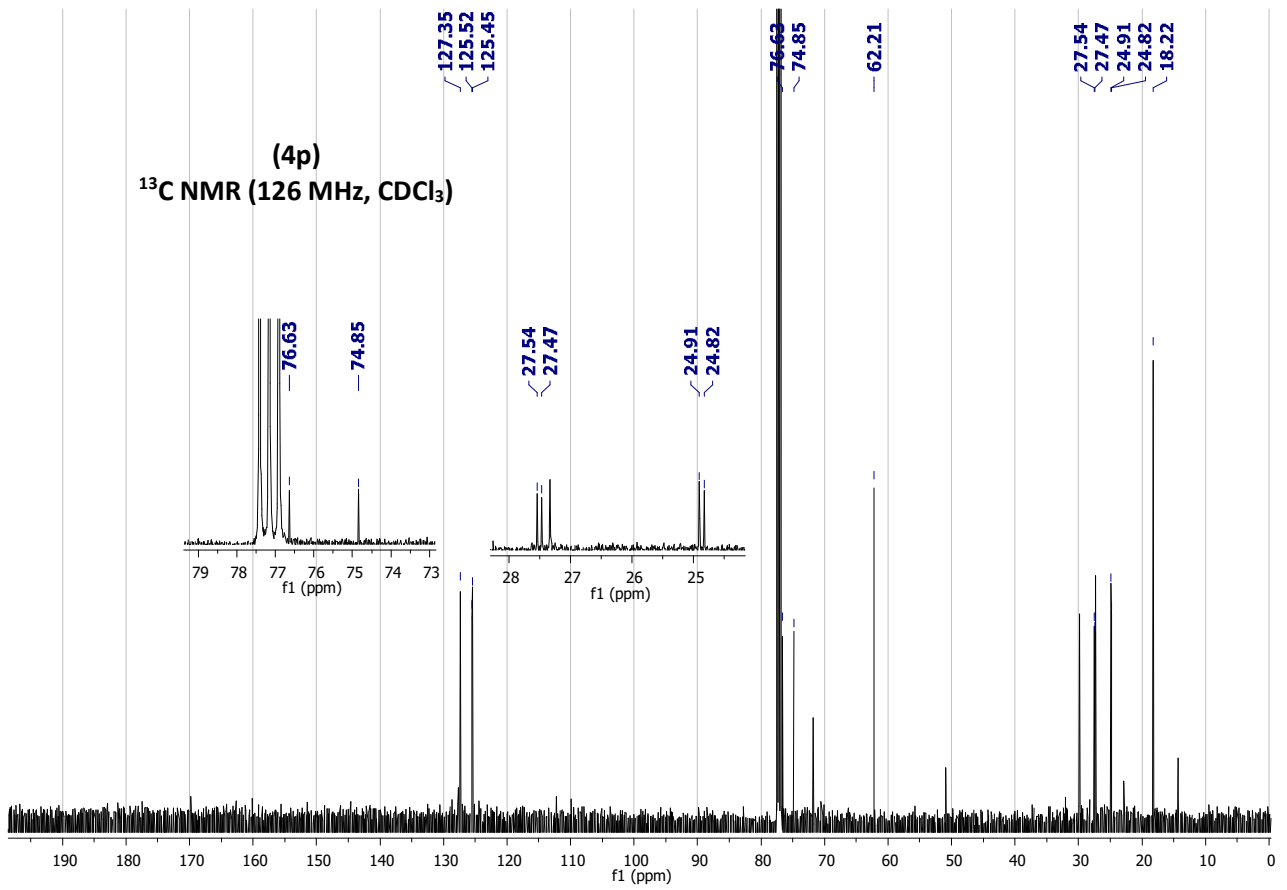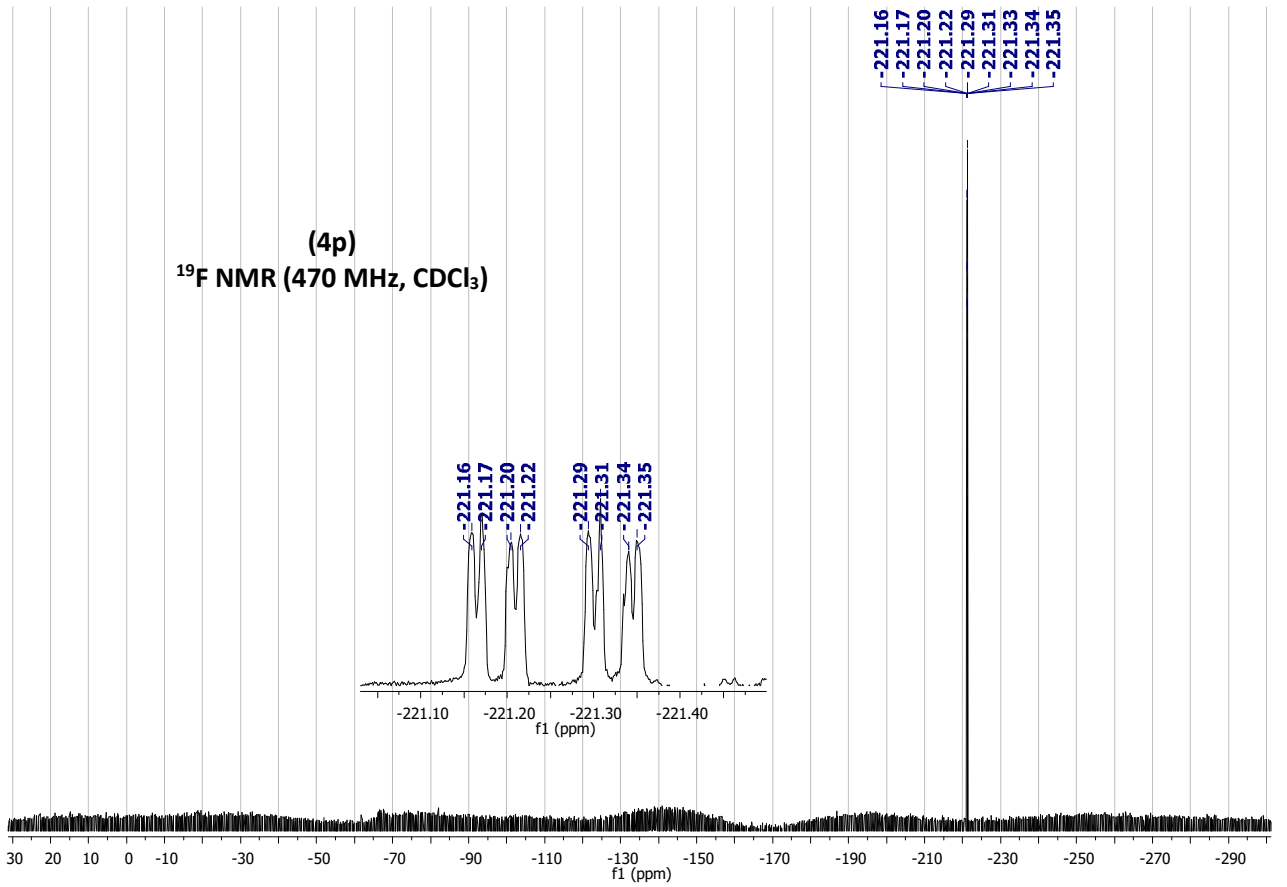

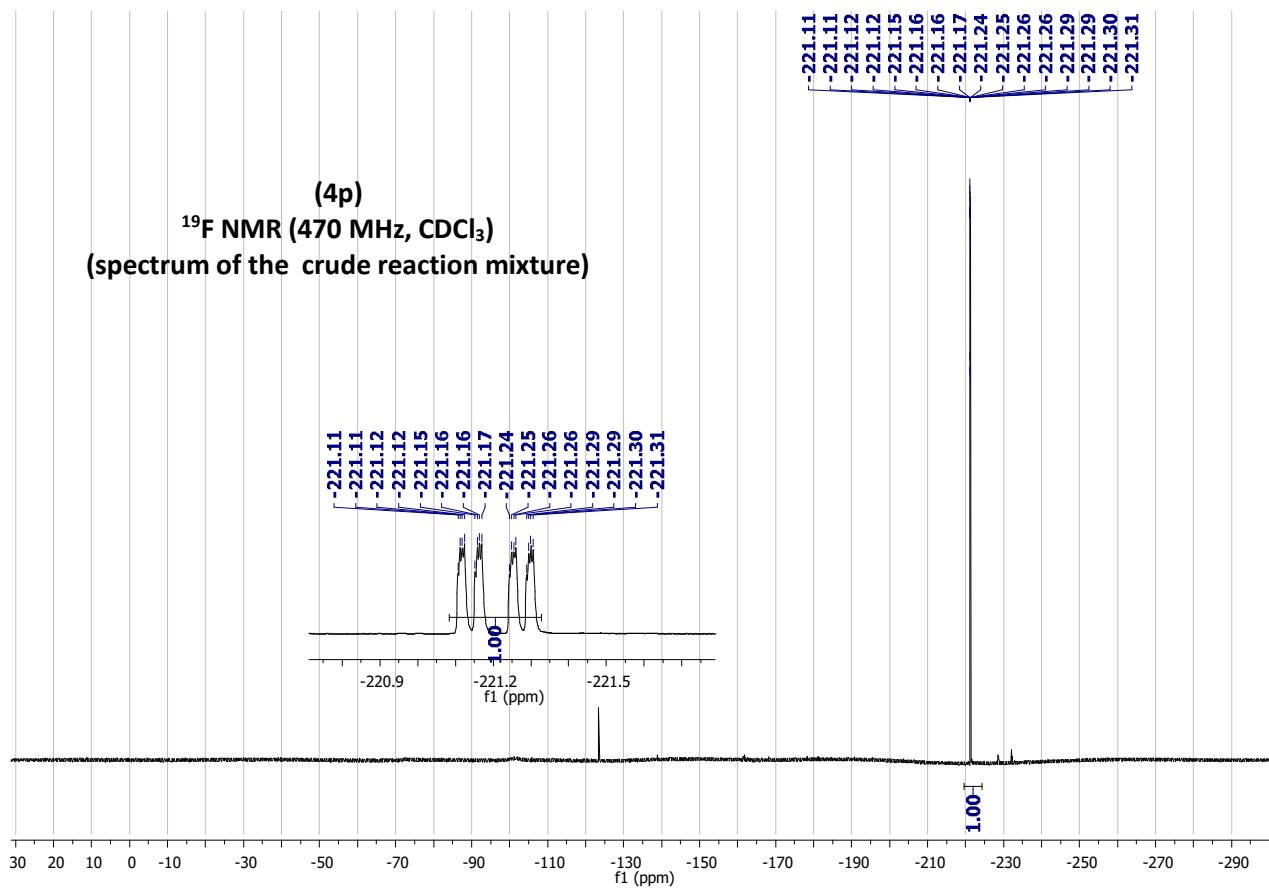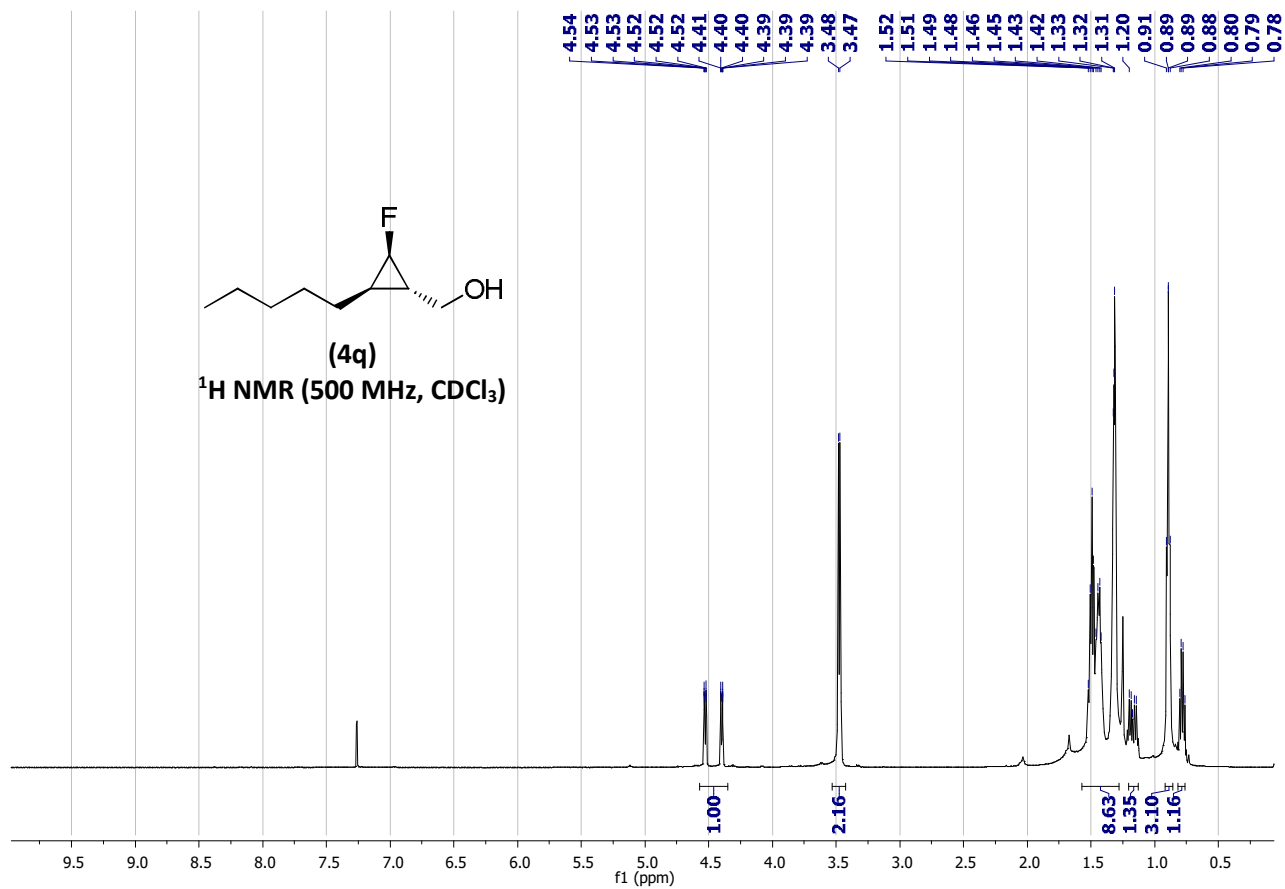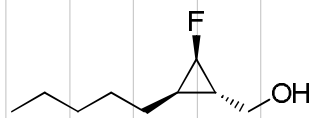

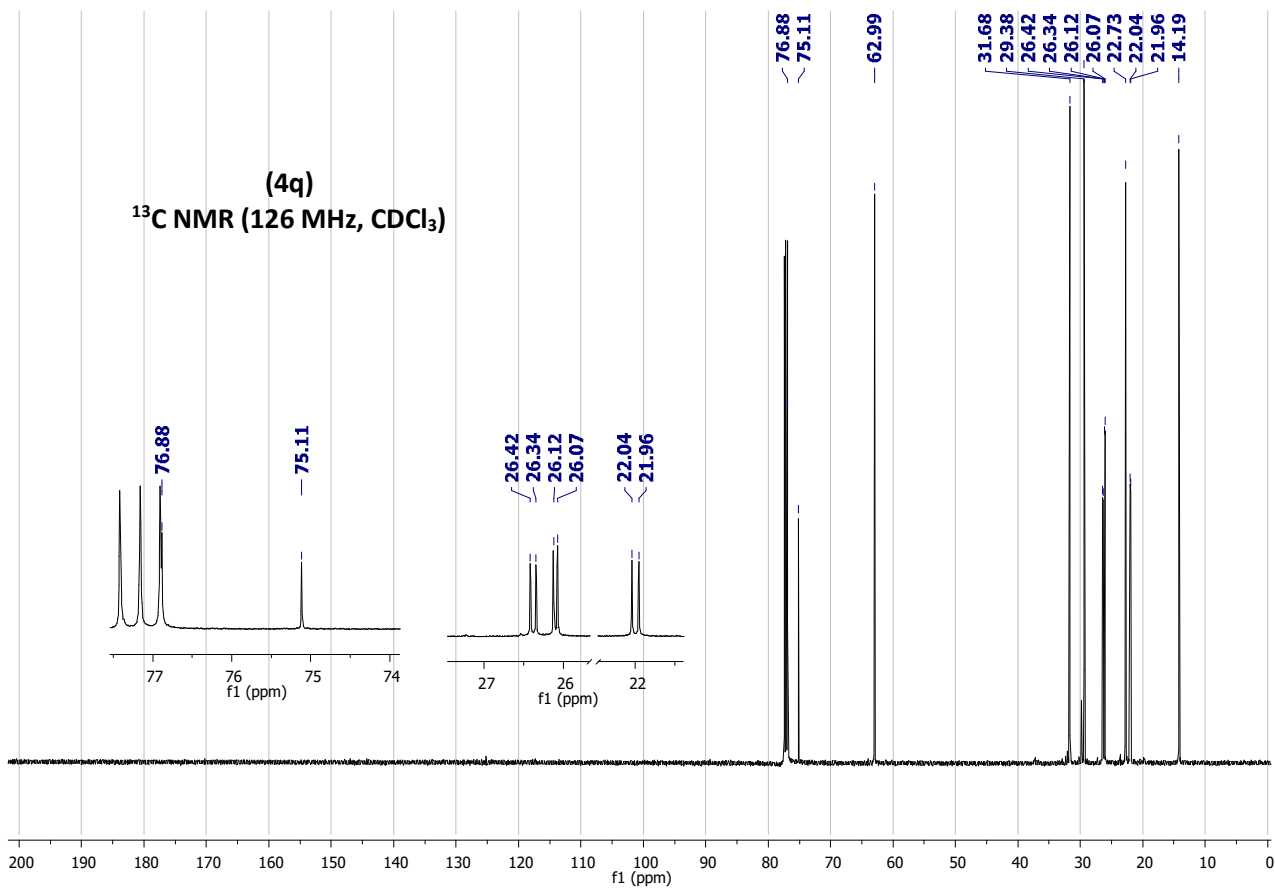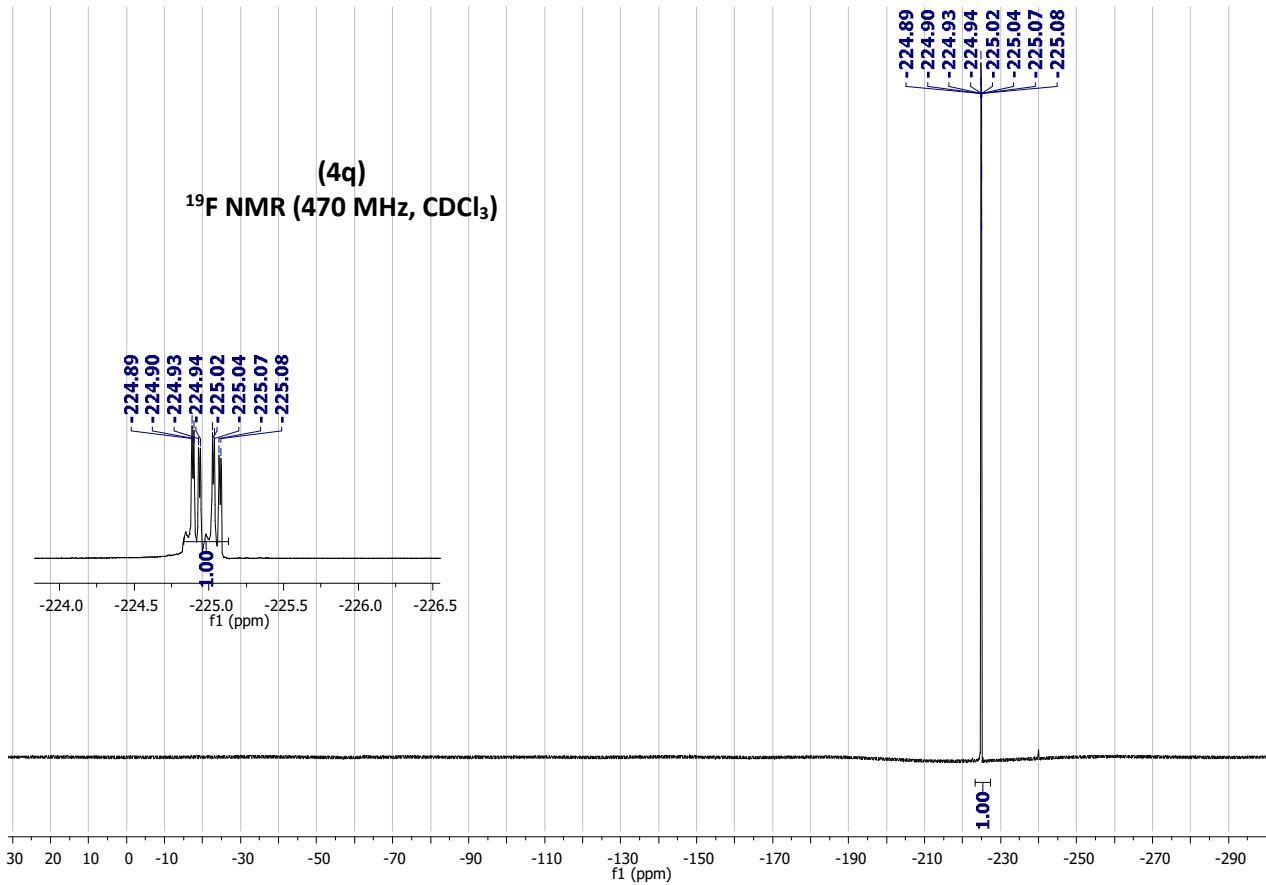

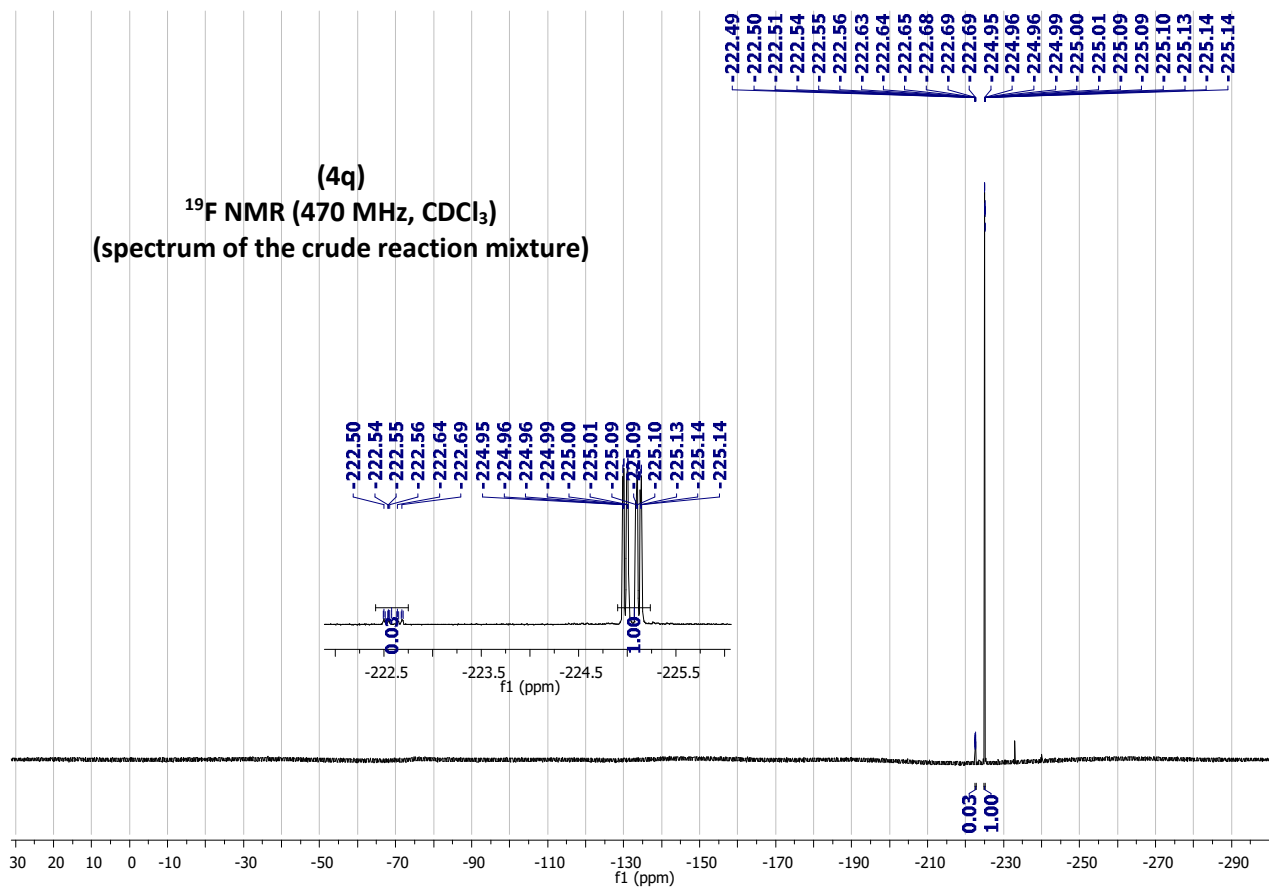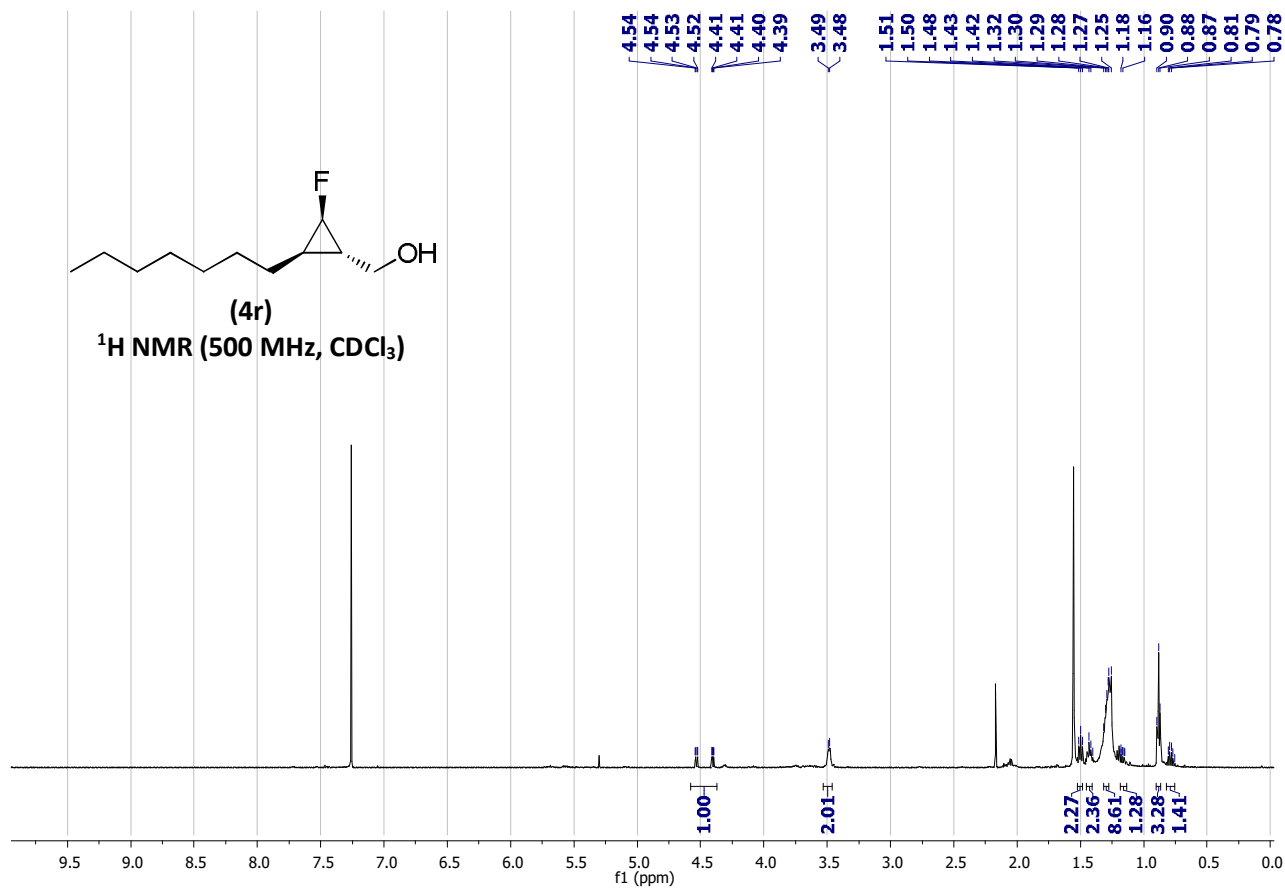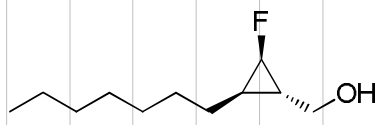



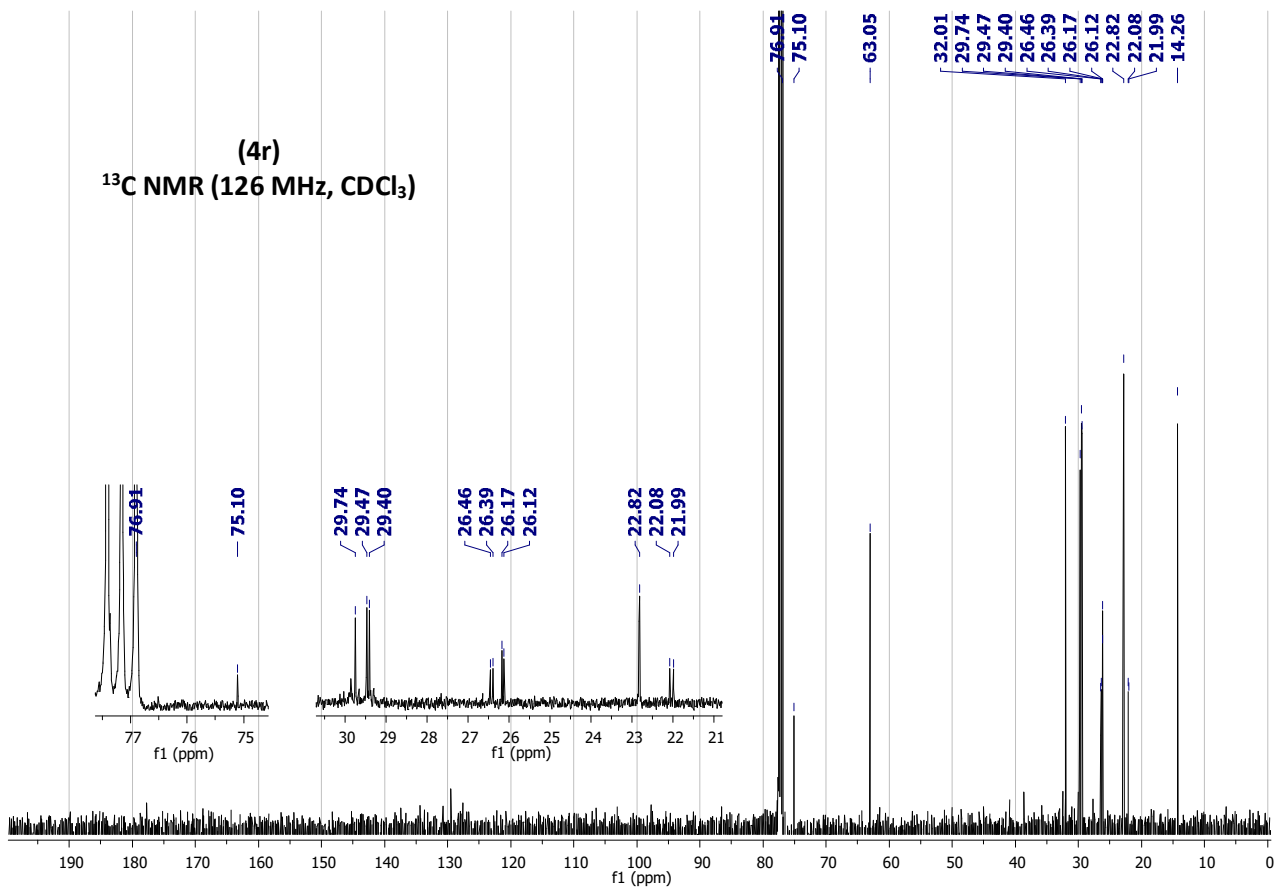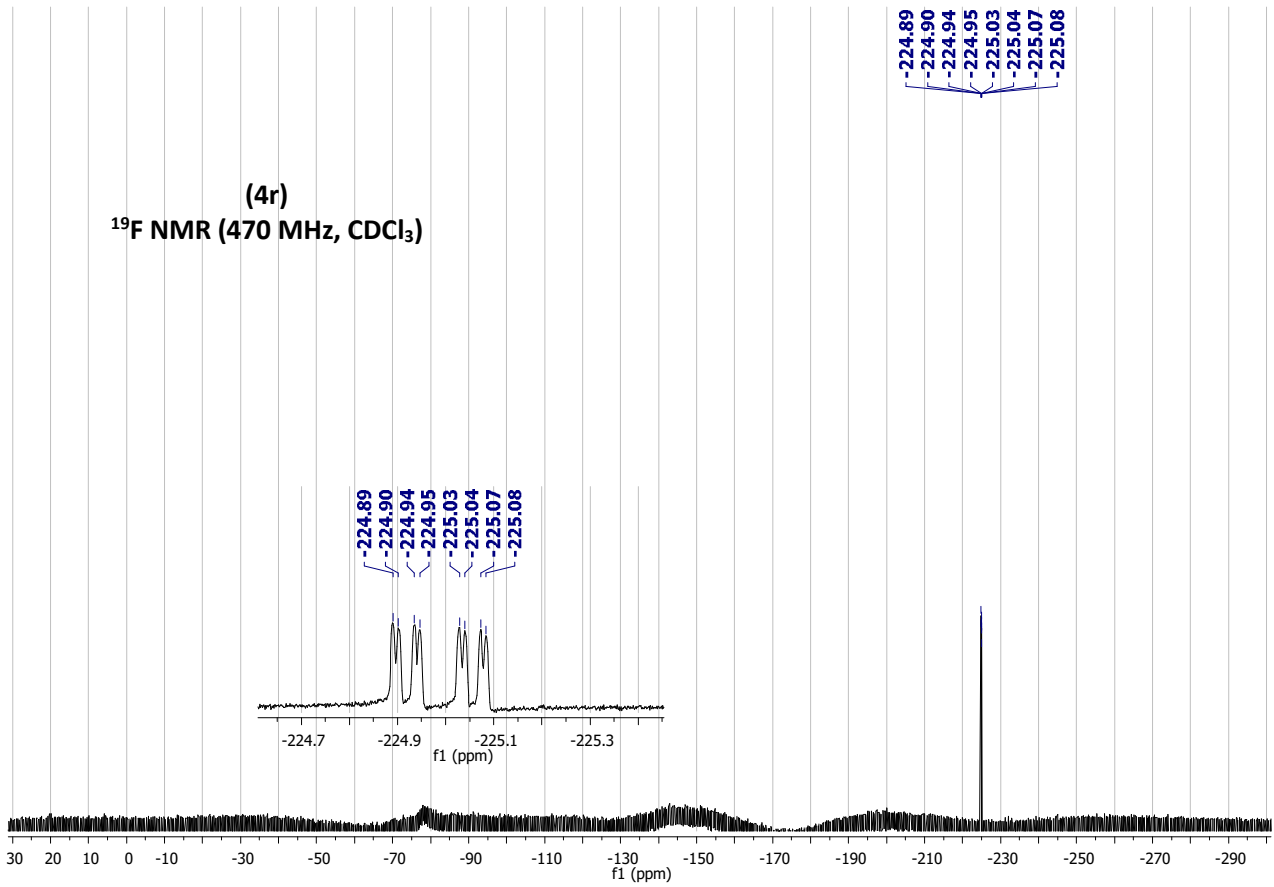

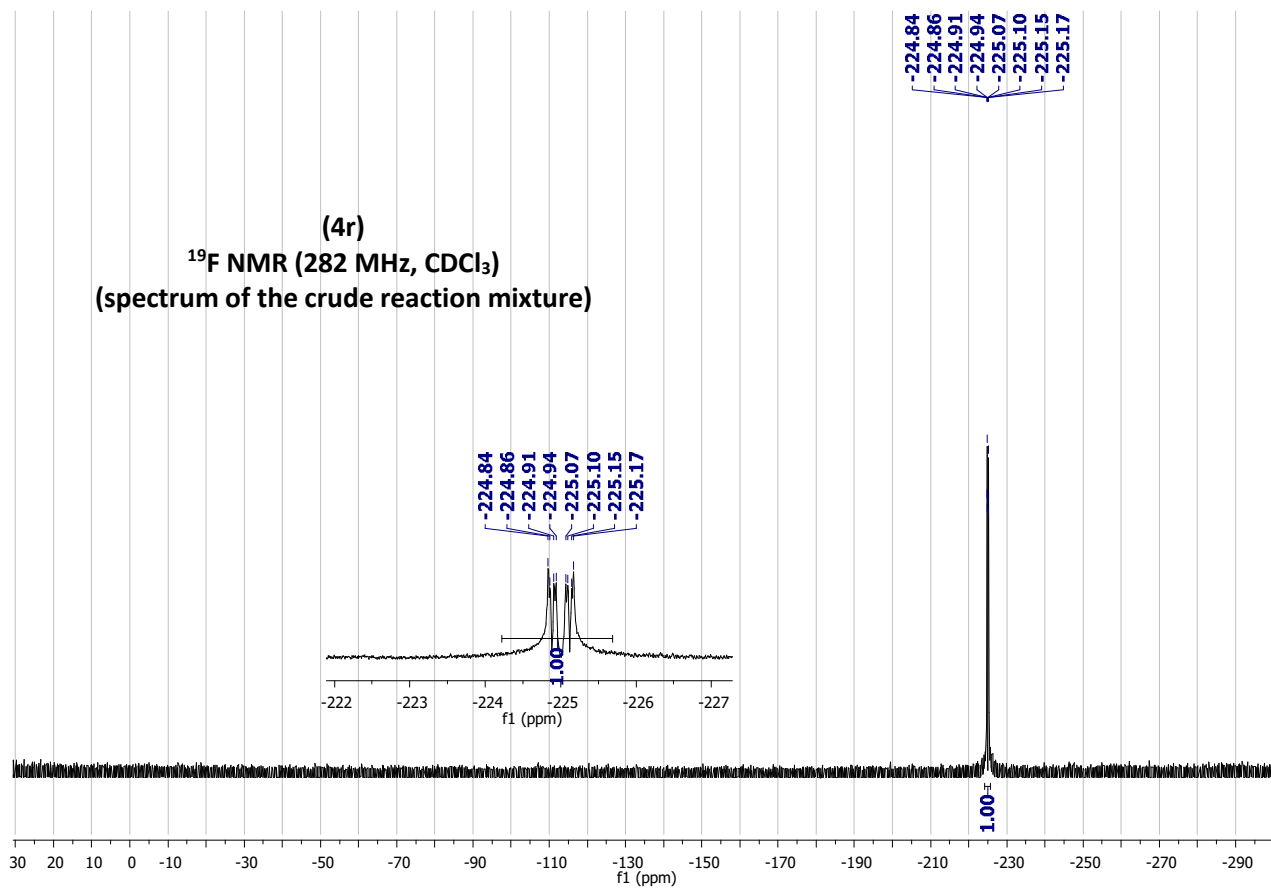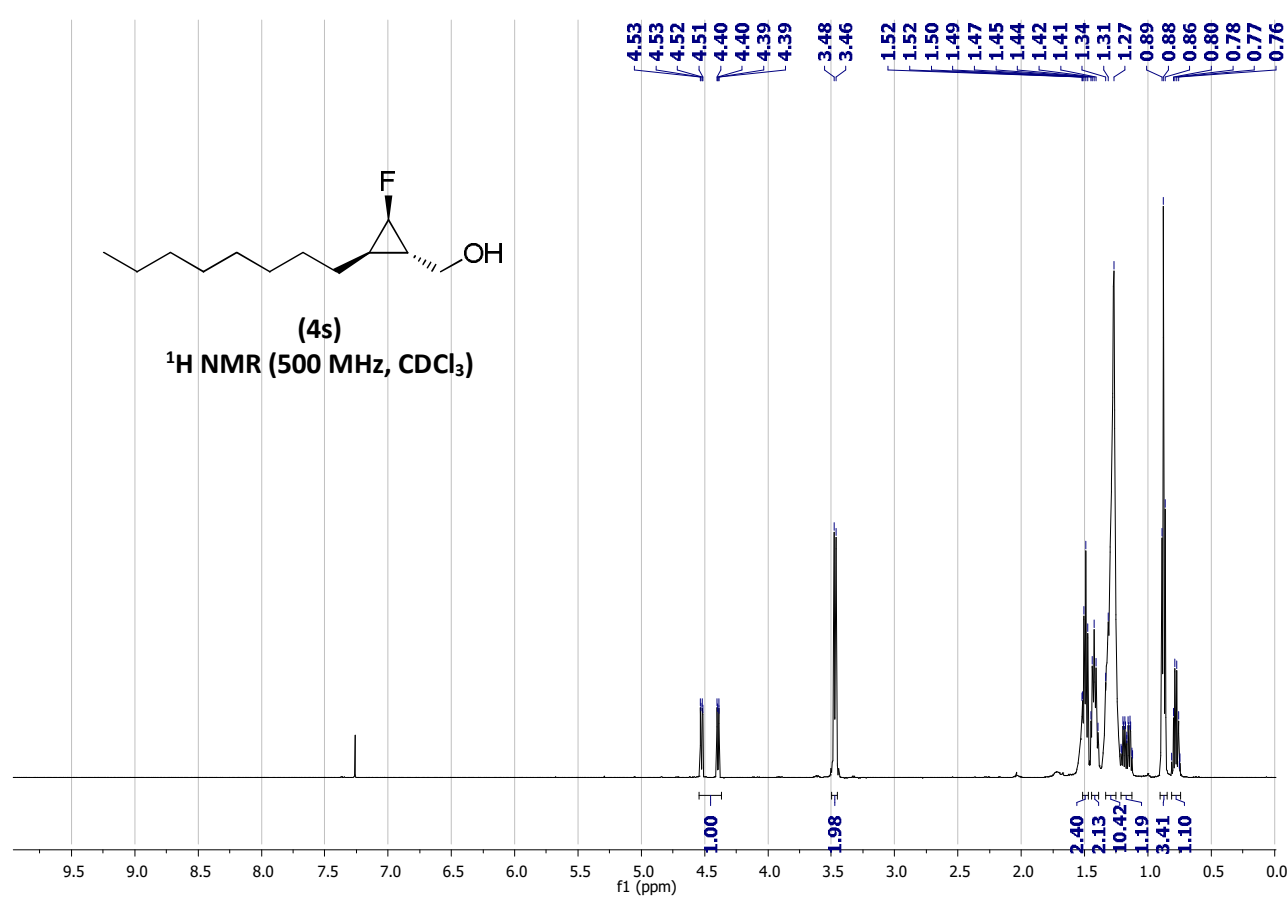

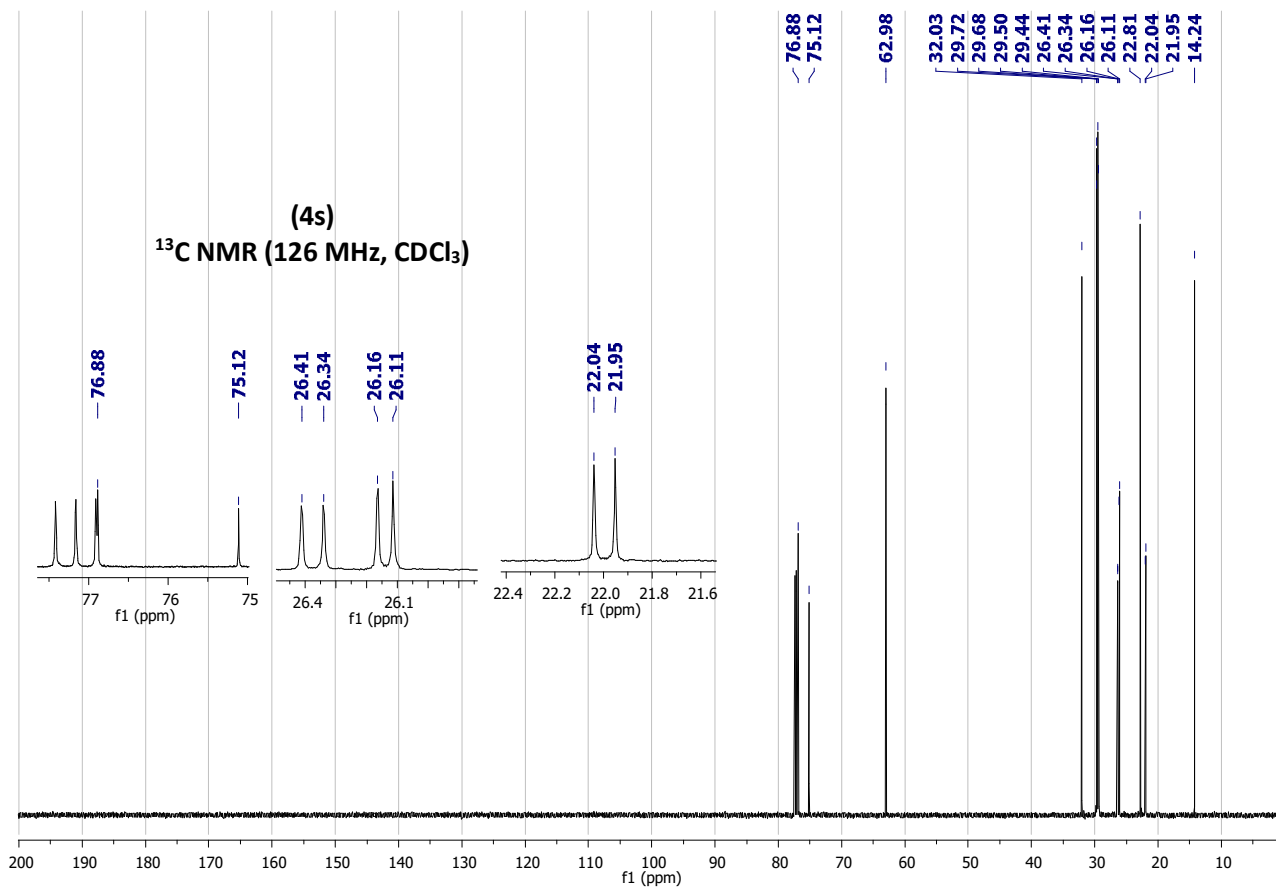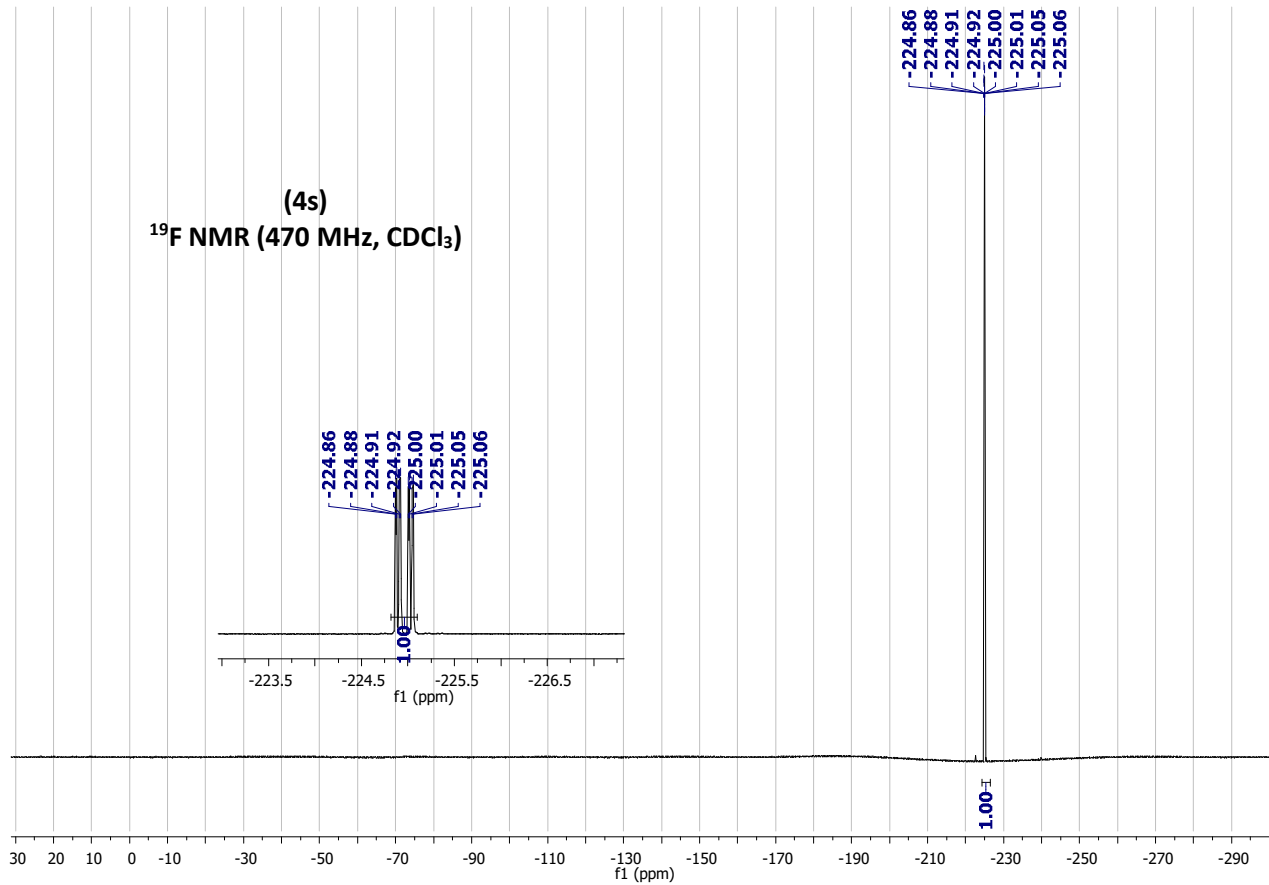

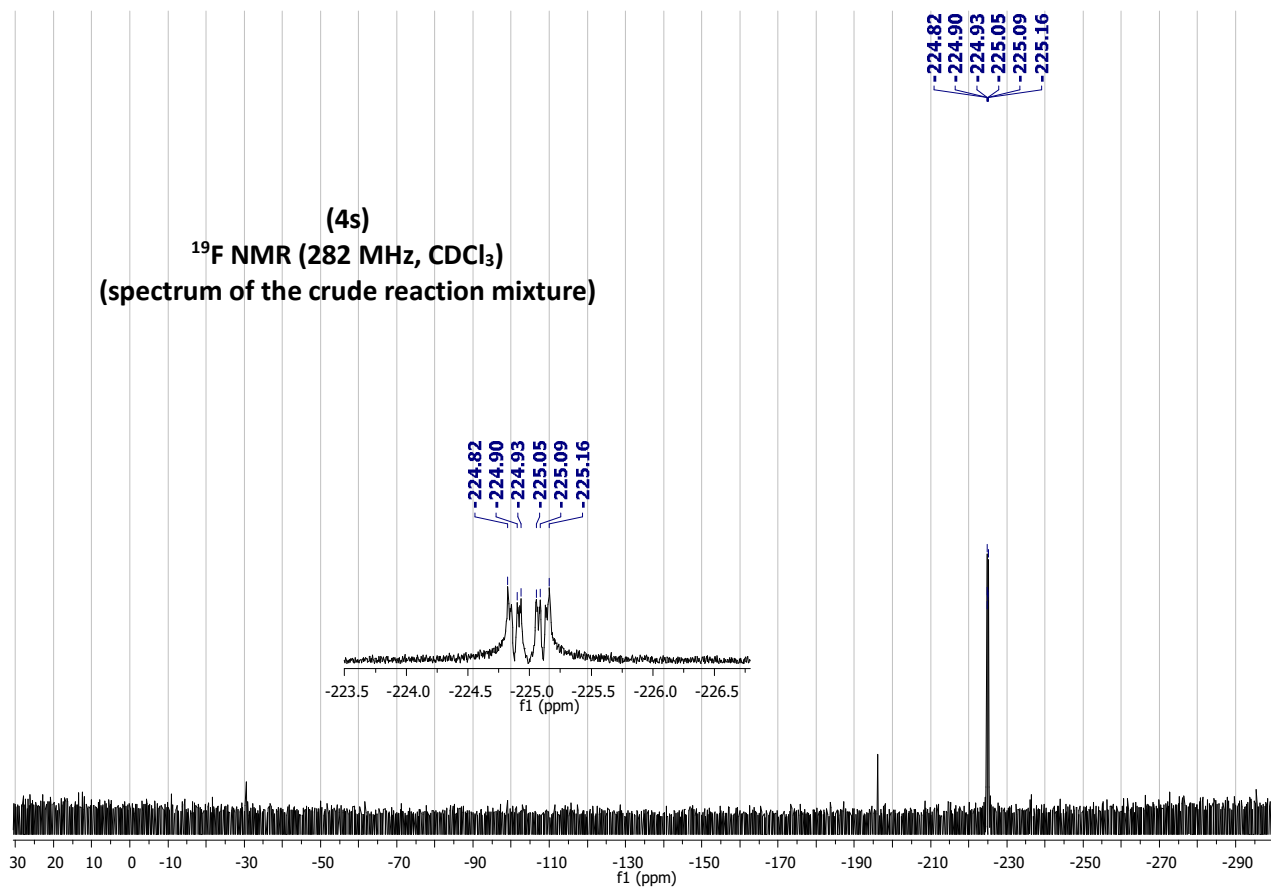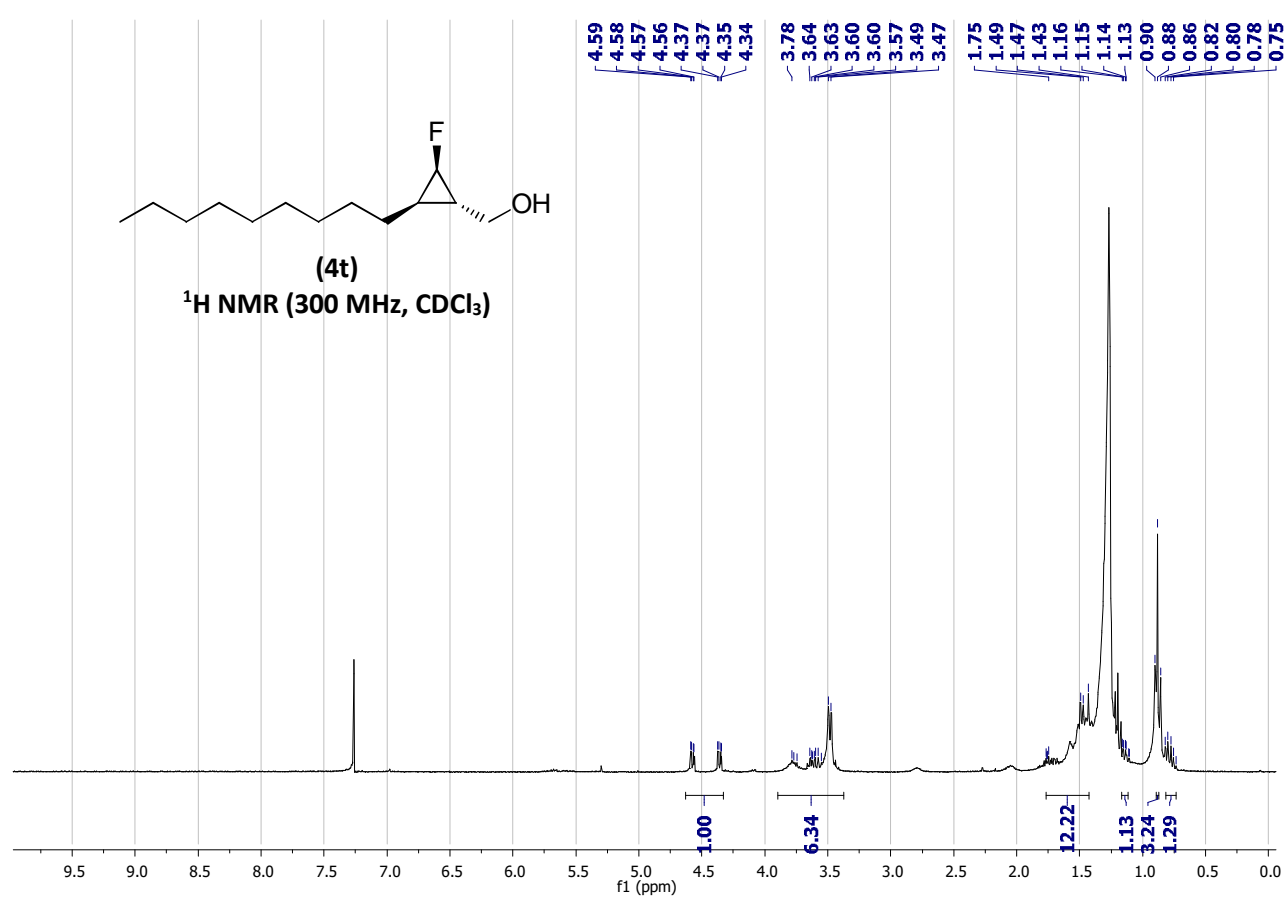

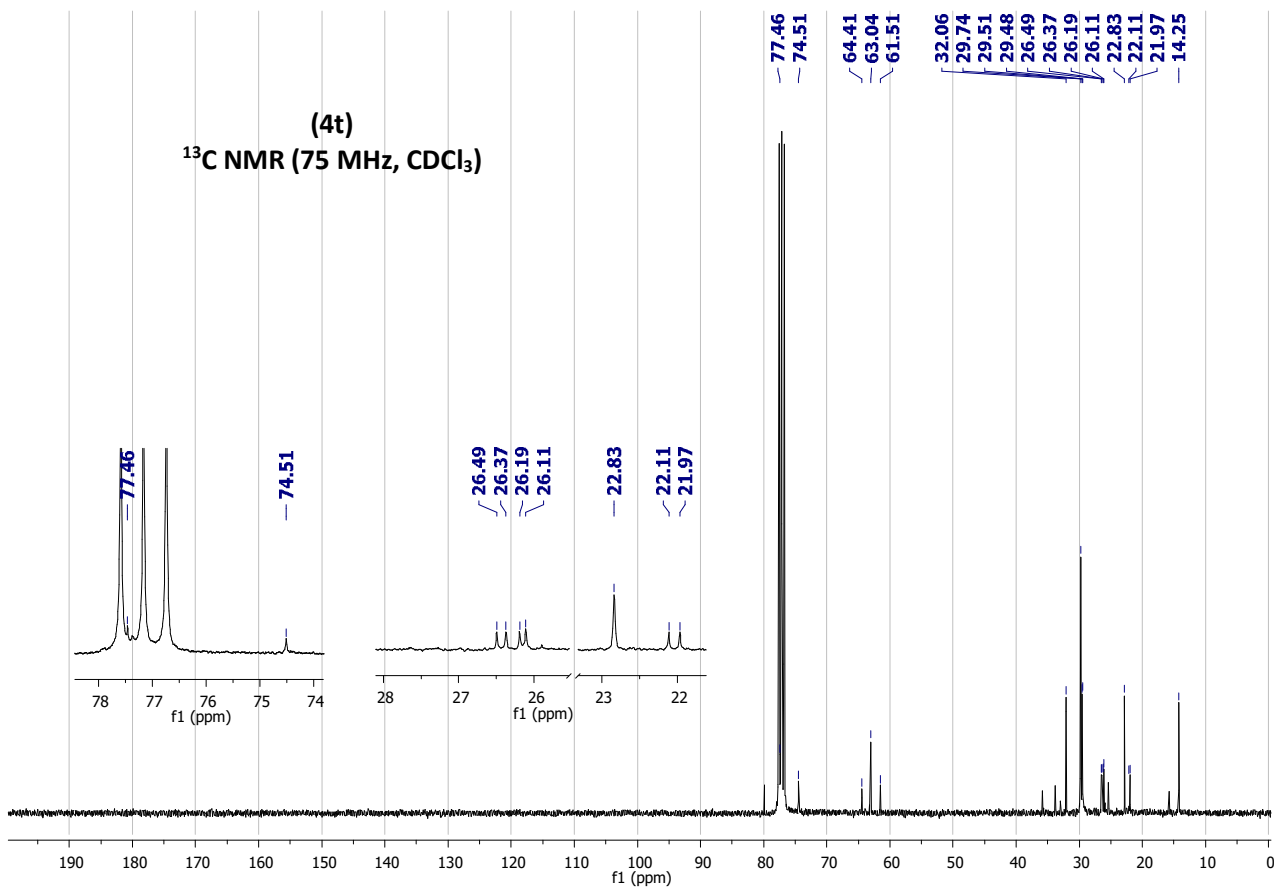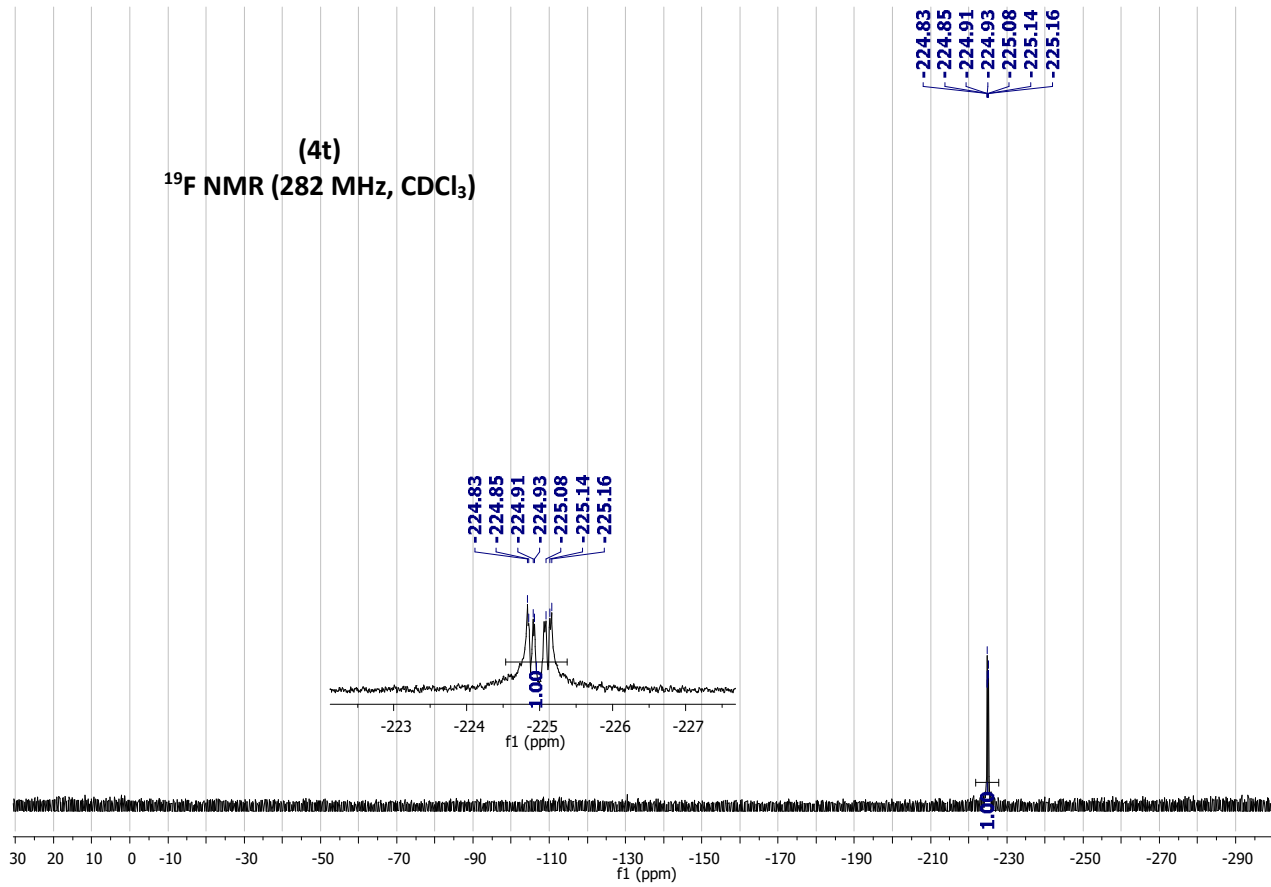

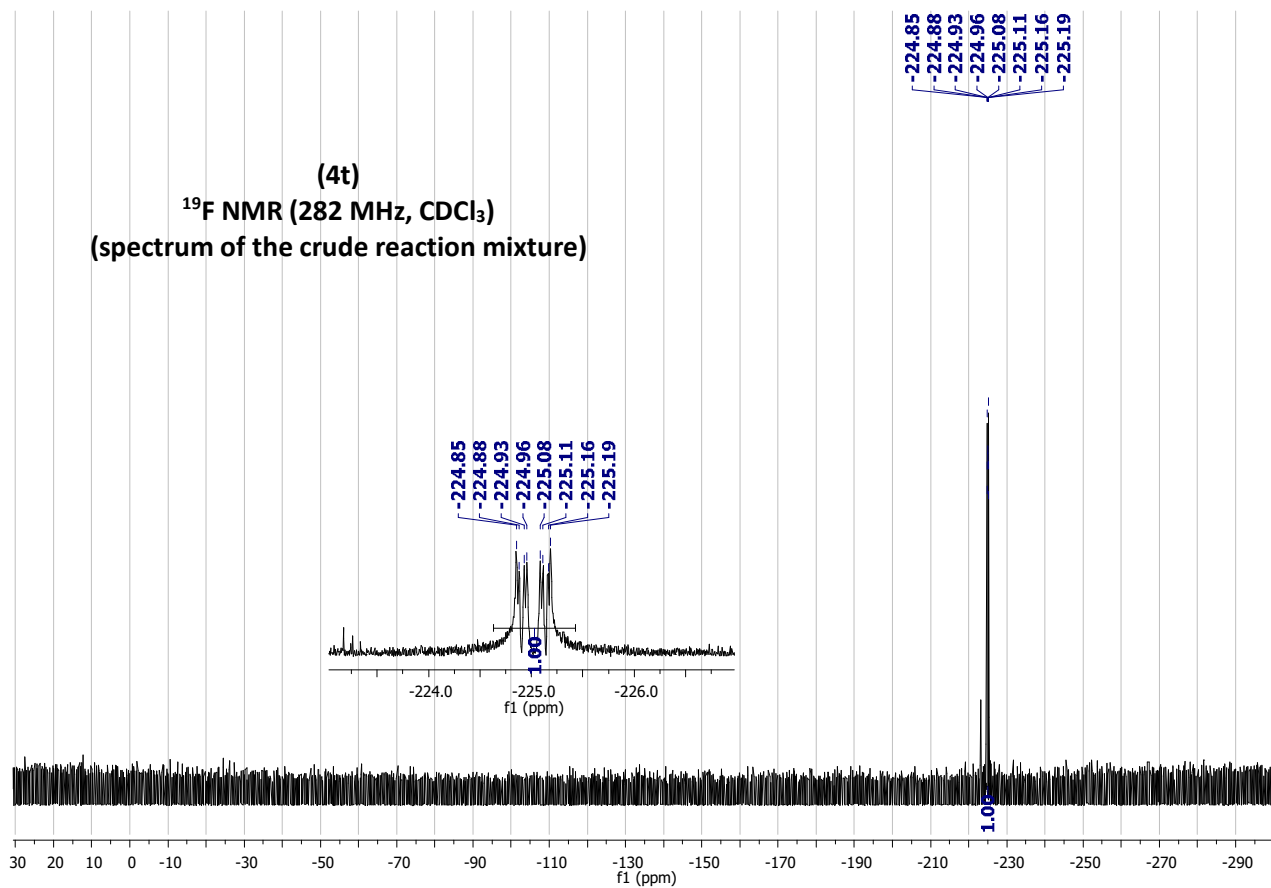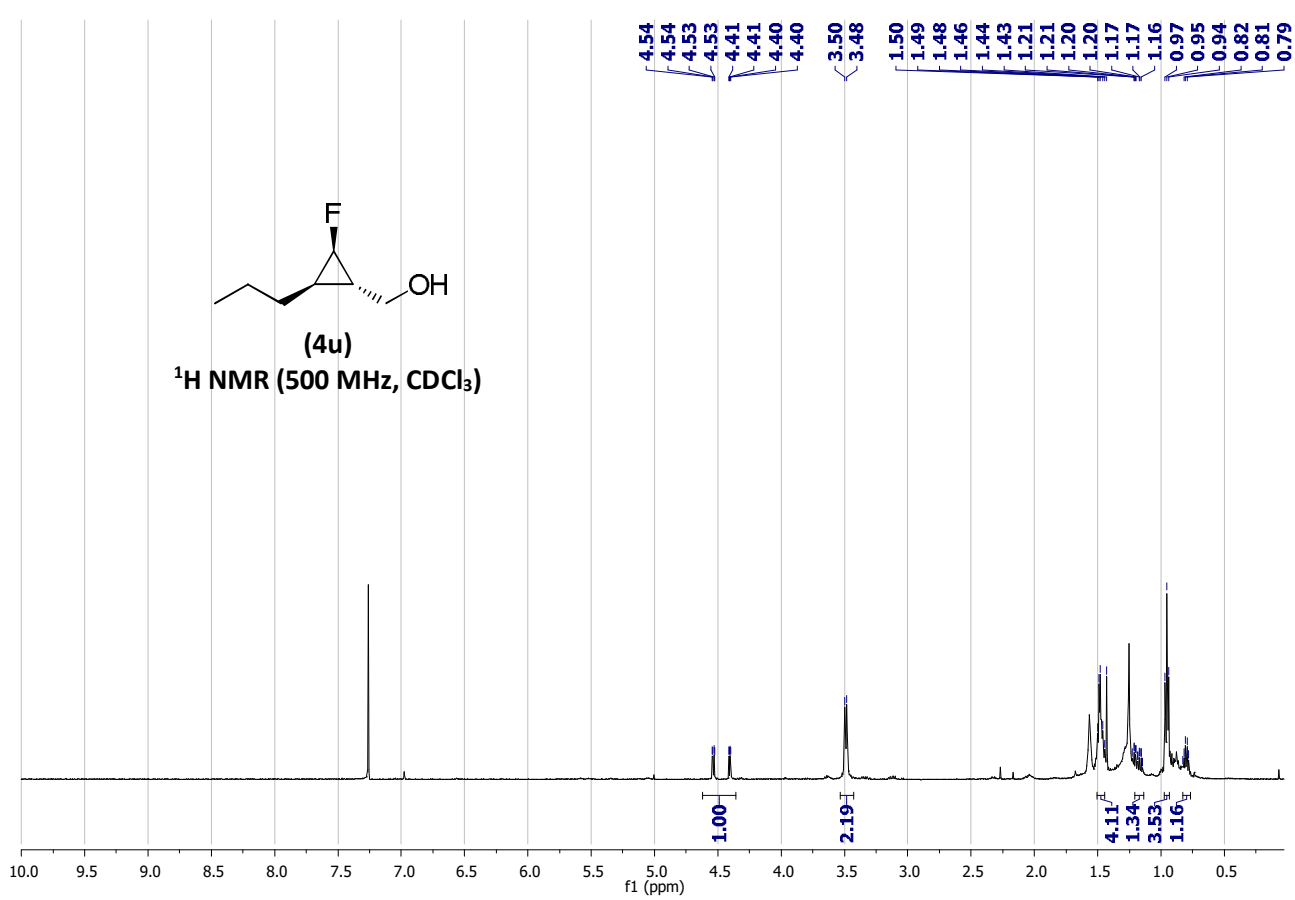

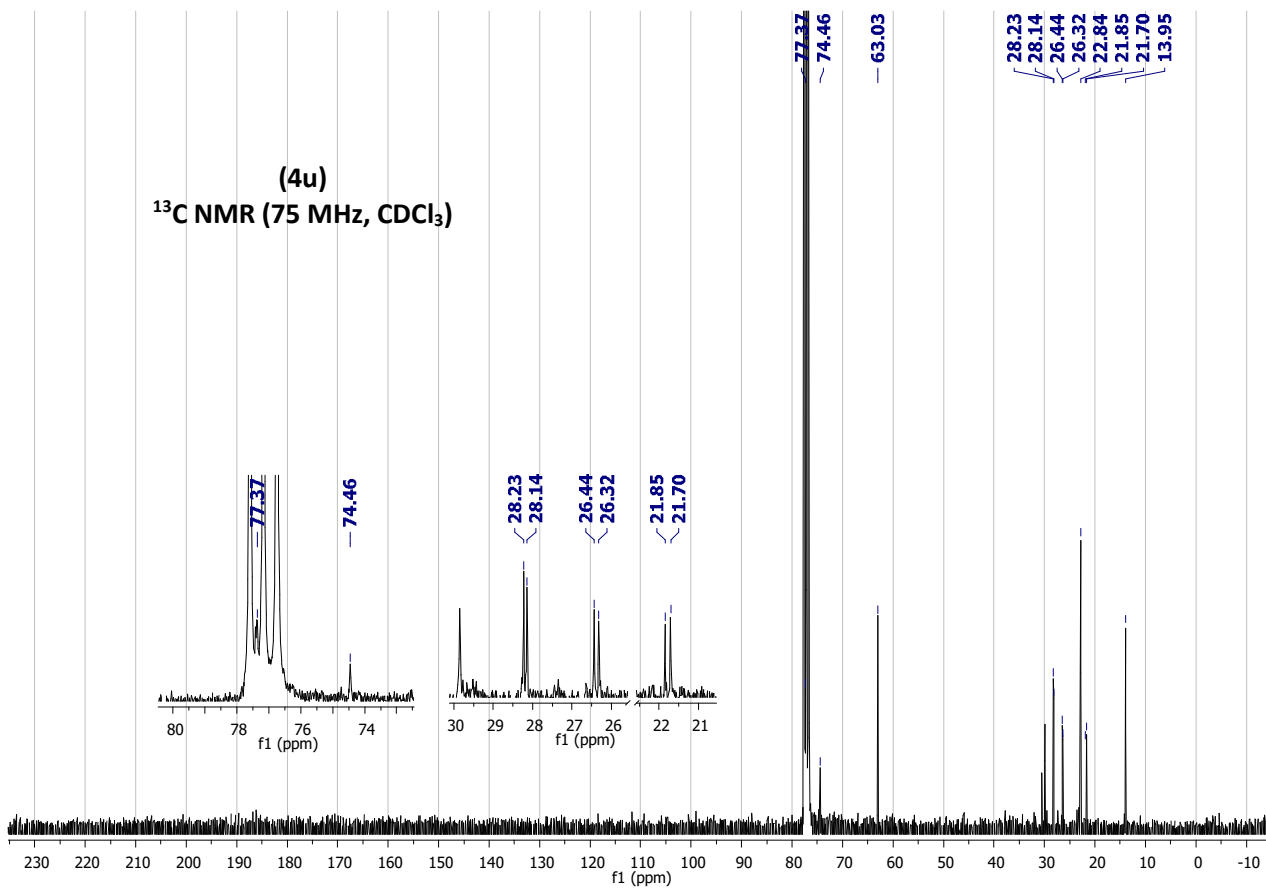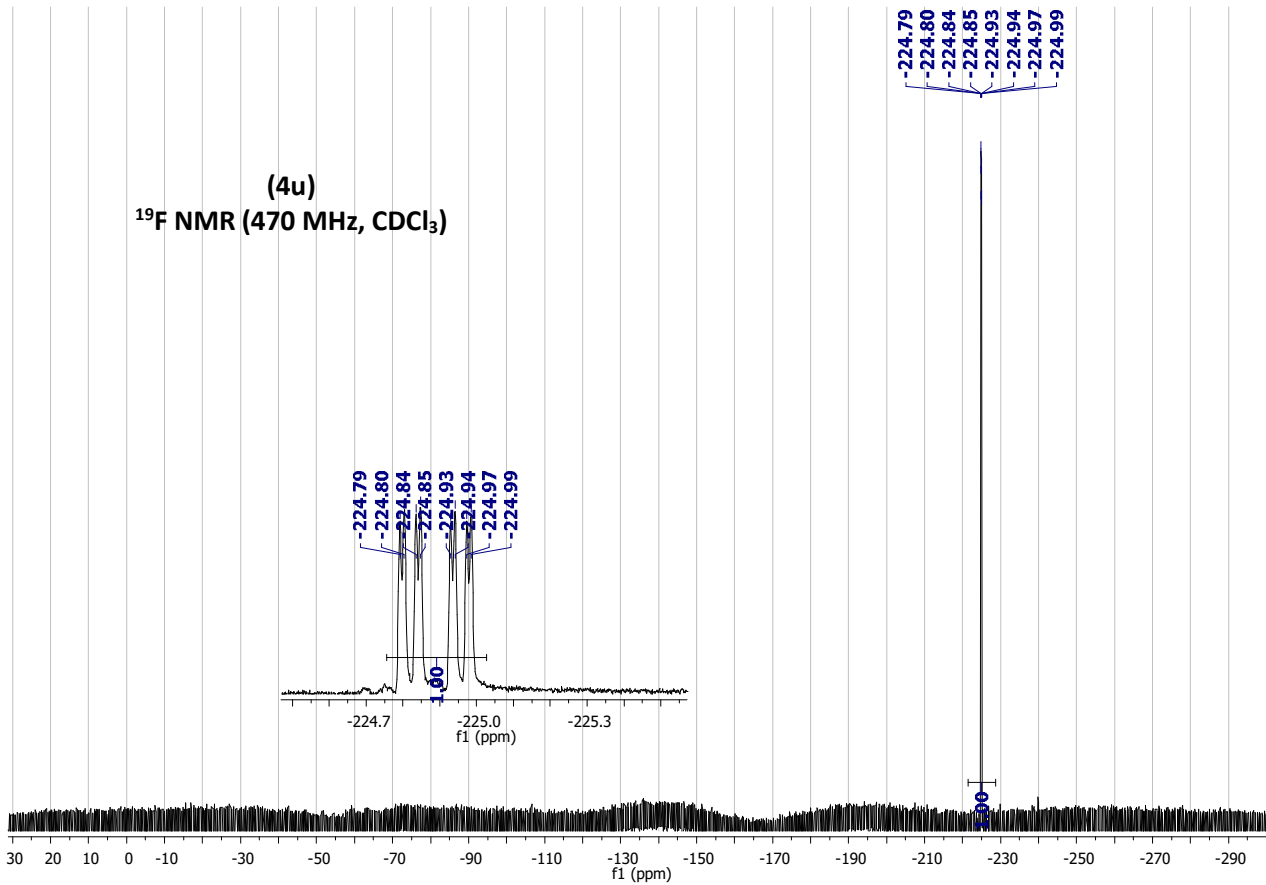

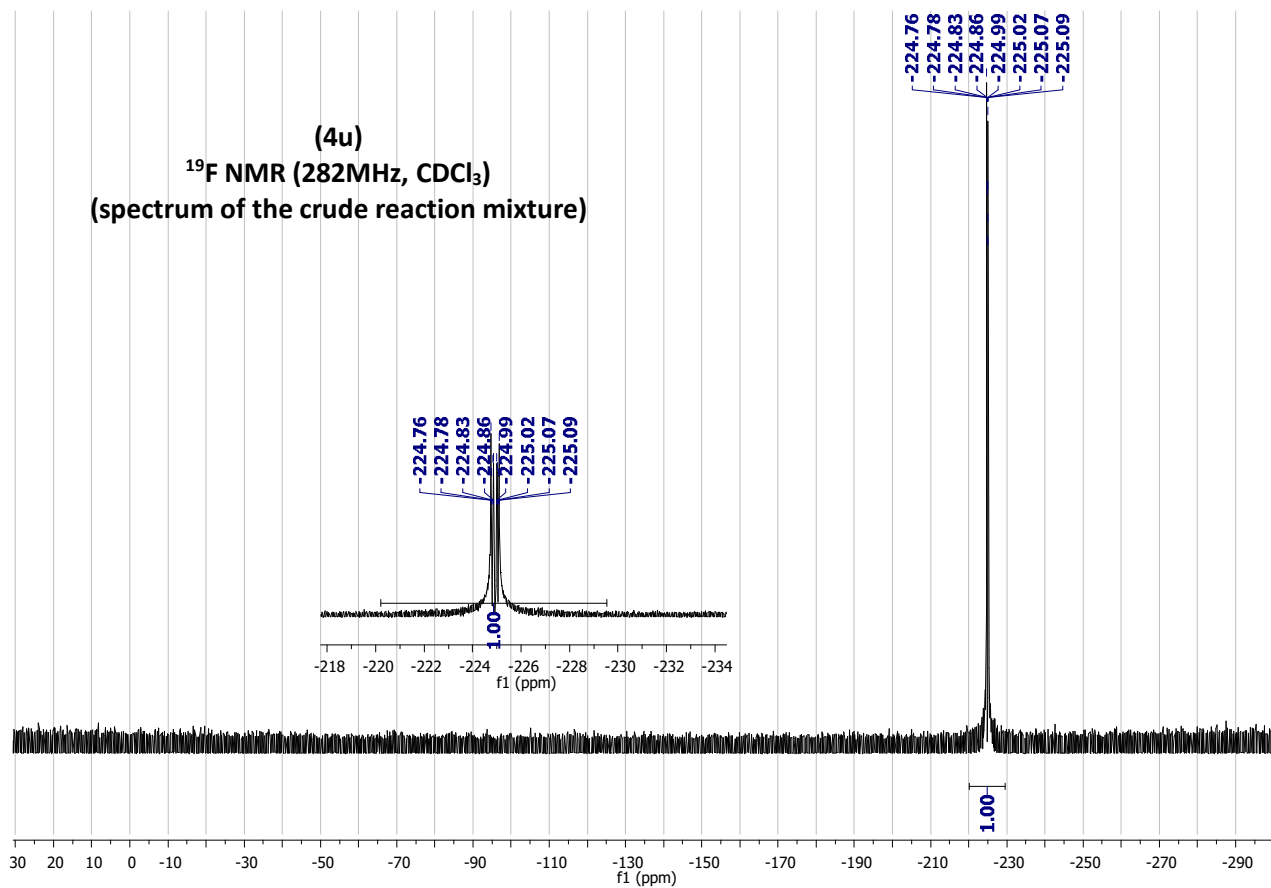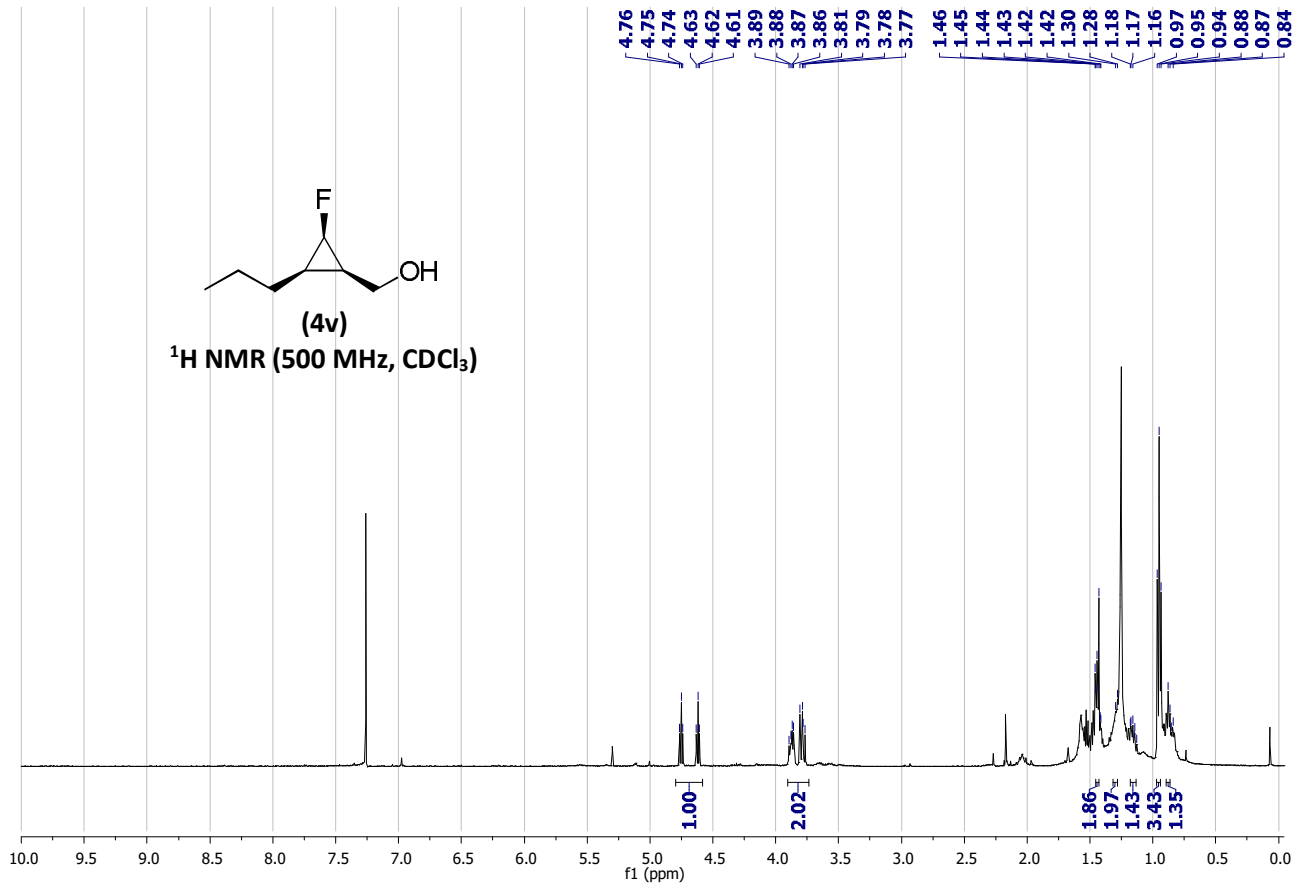



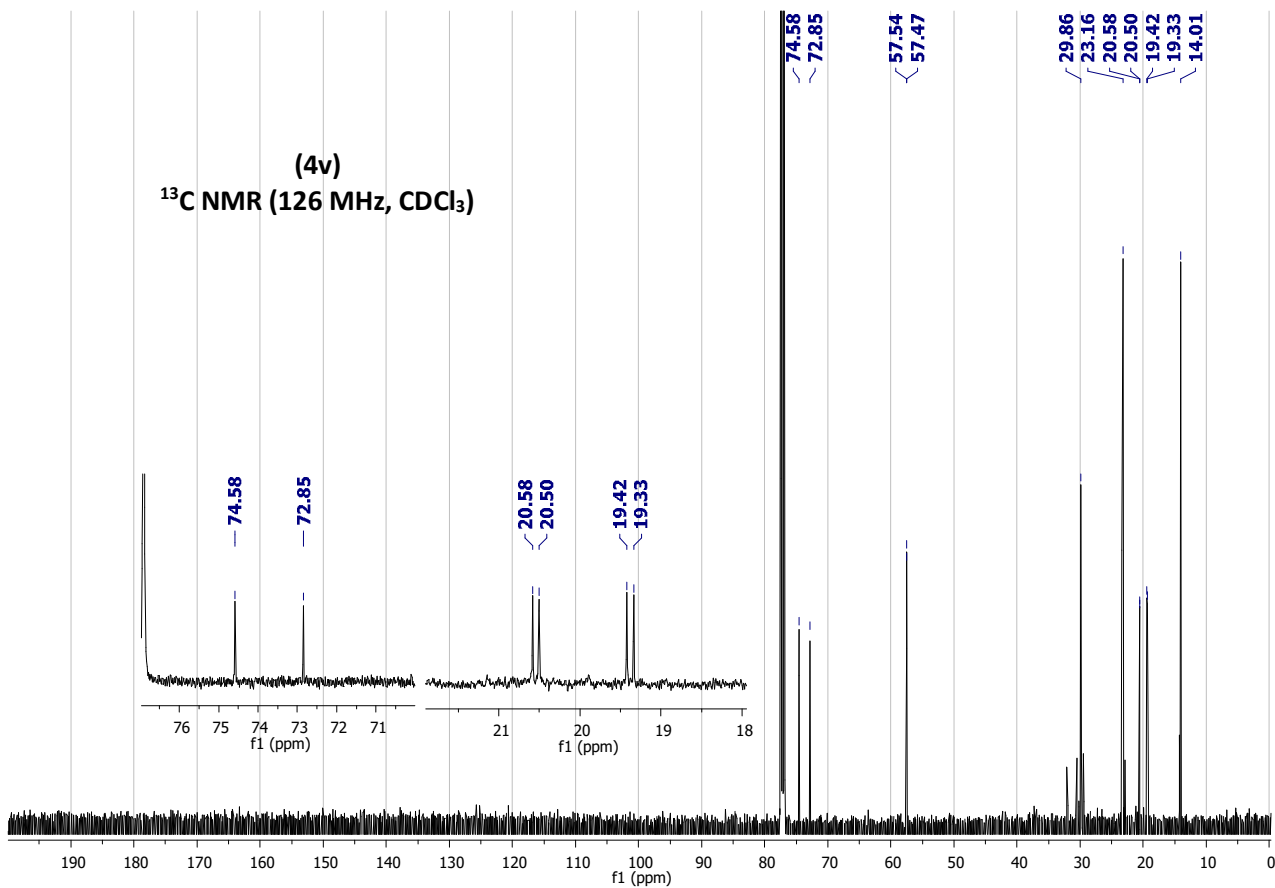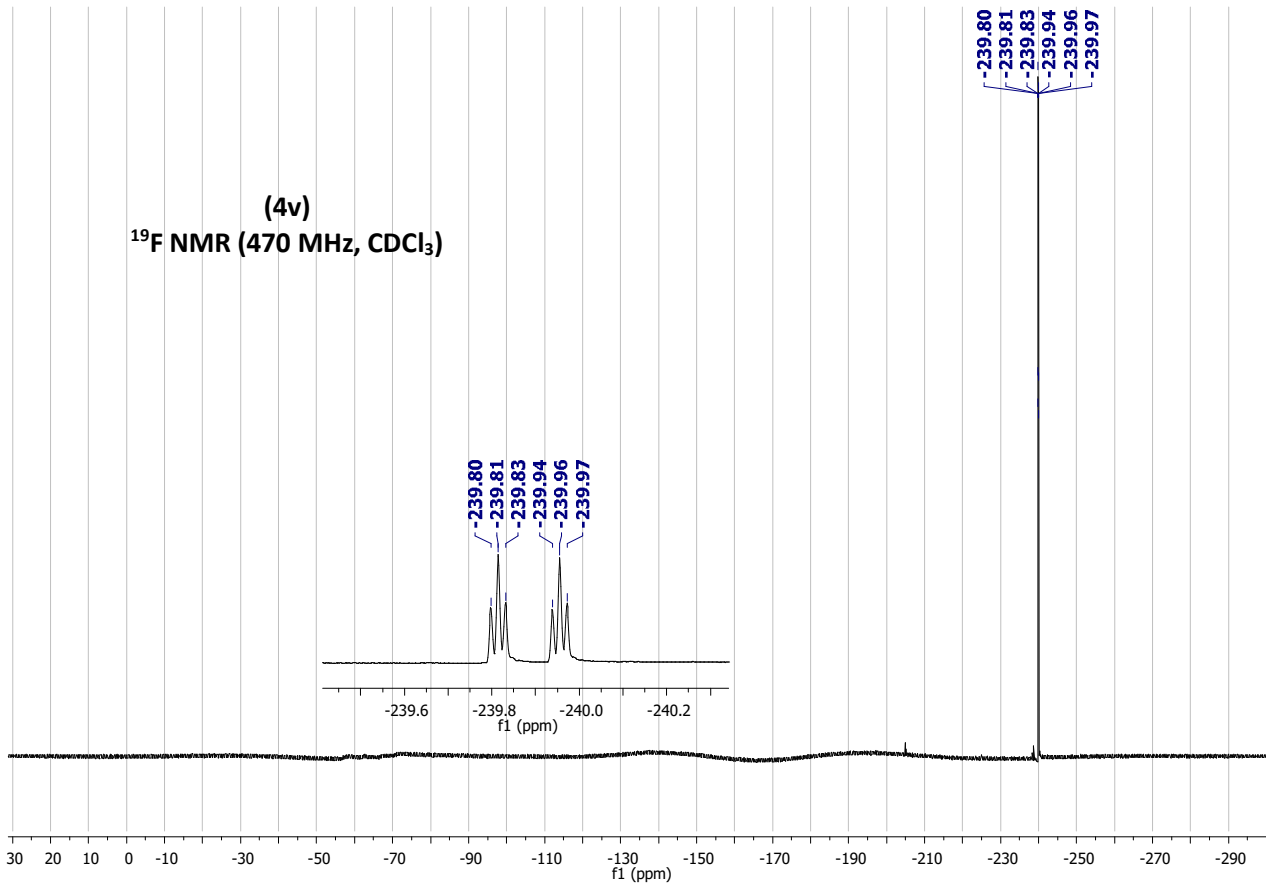

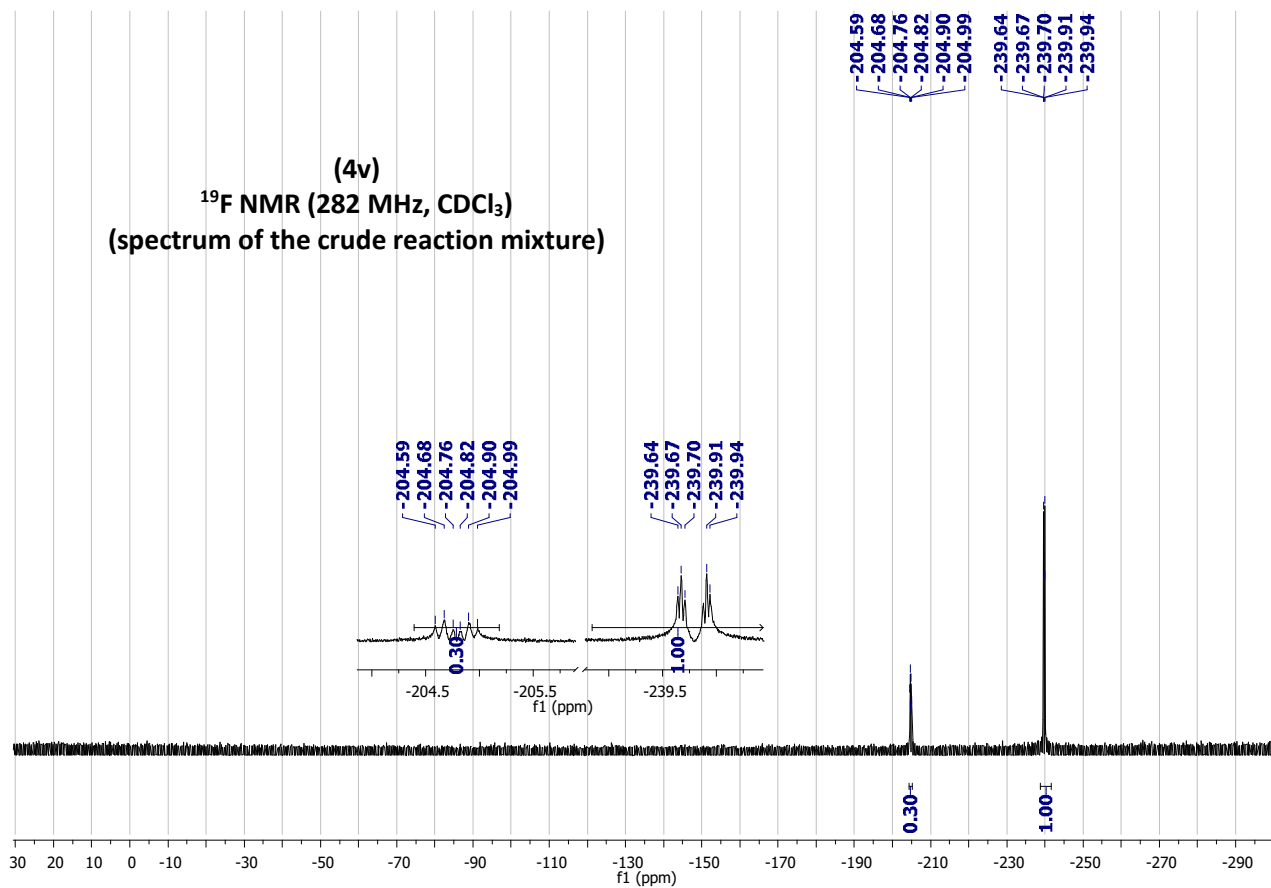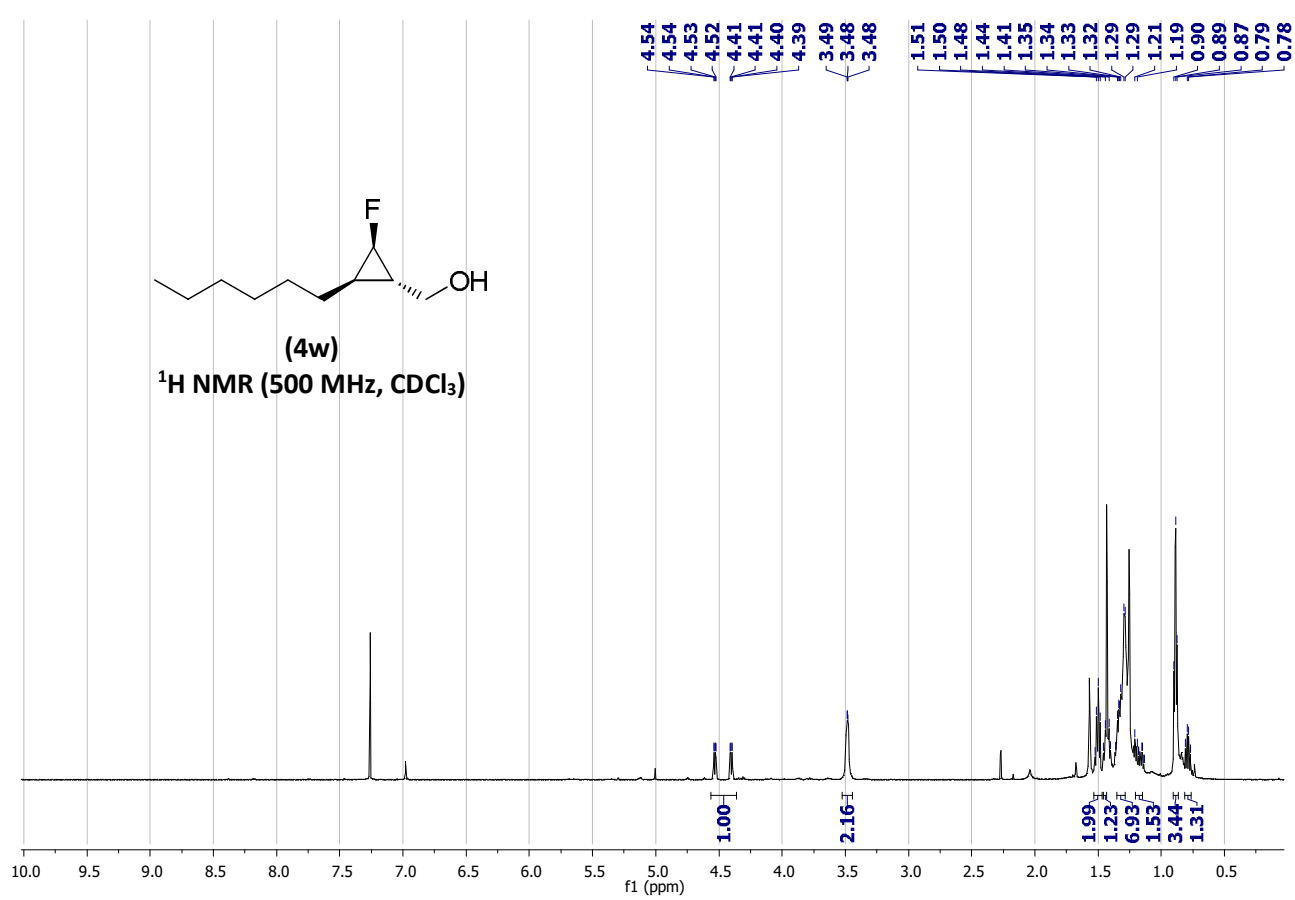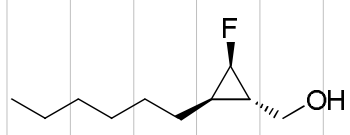

(4w)  
<sup>13</sup>C NMR (126 MHz, CDCl<sub>3</sub>)

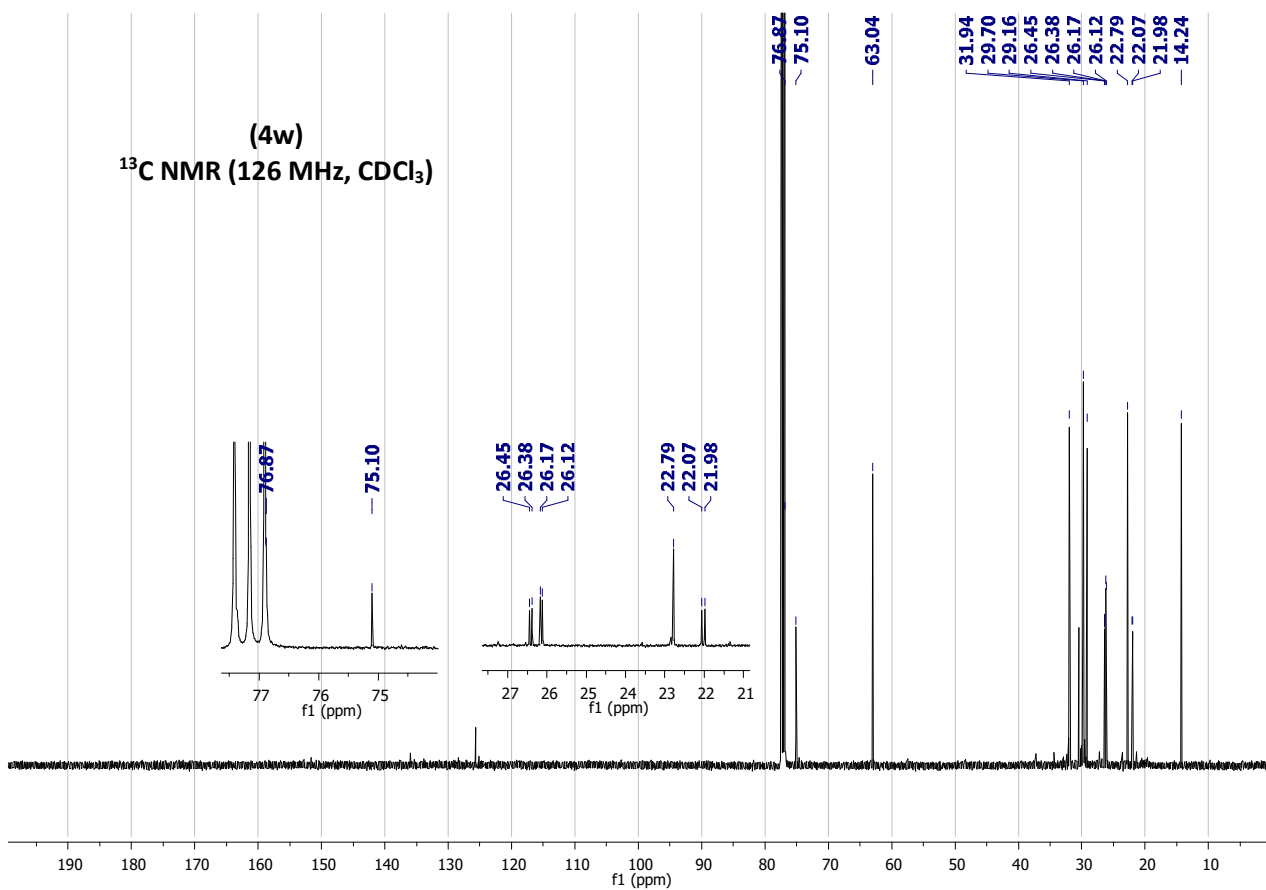

(4w)  
<sup>19</sup>F NMR (470 MHz, CDCl<sub>3</sub>)

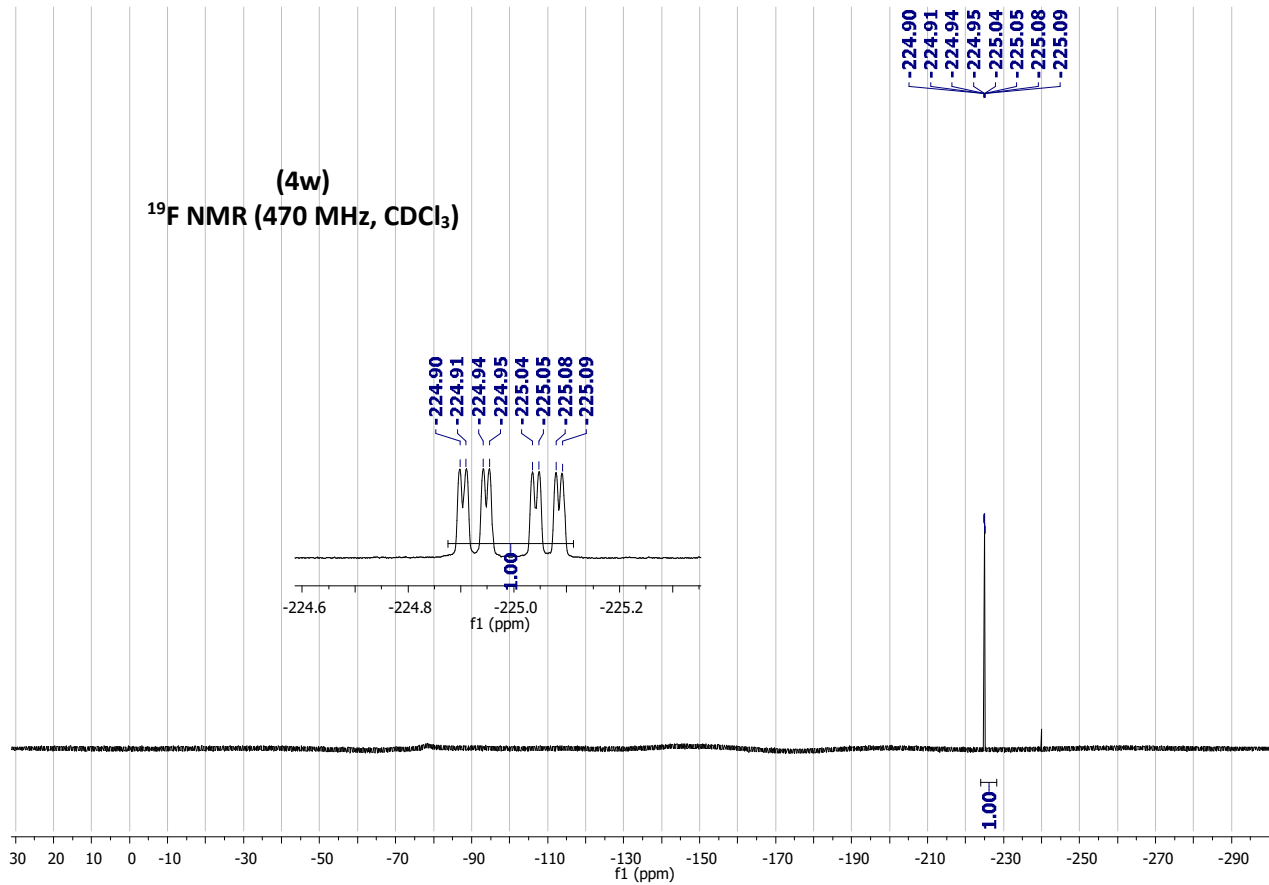

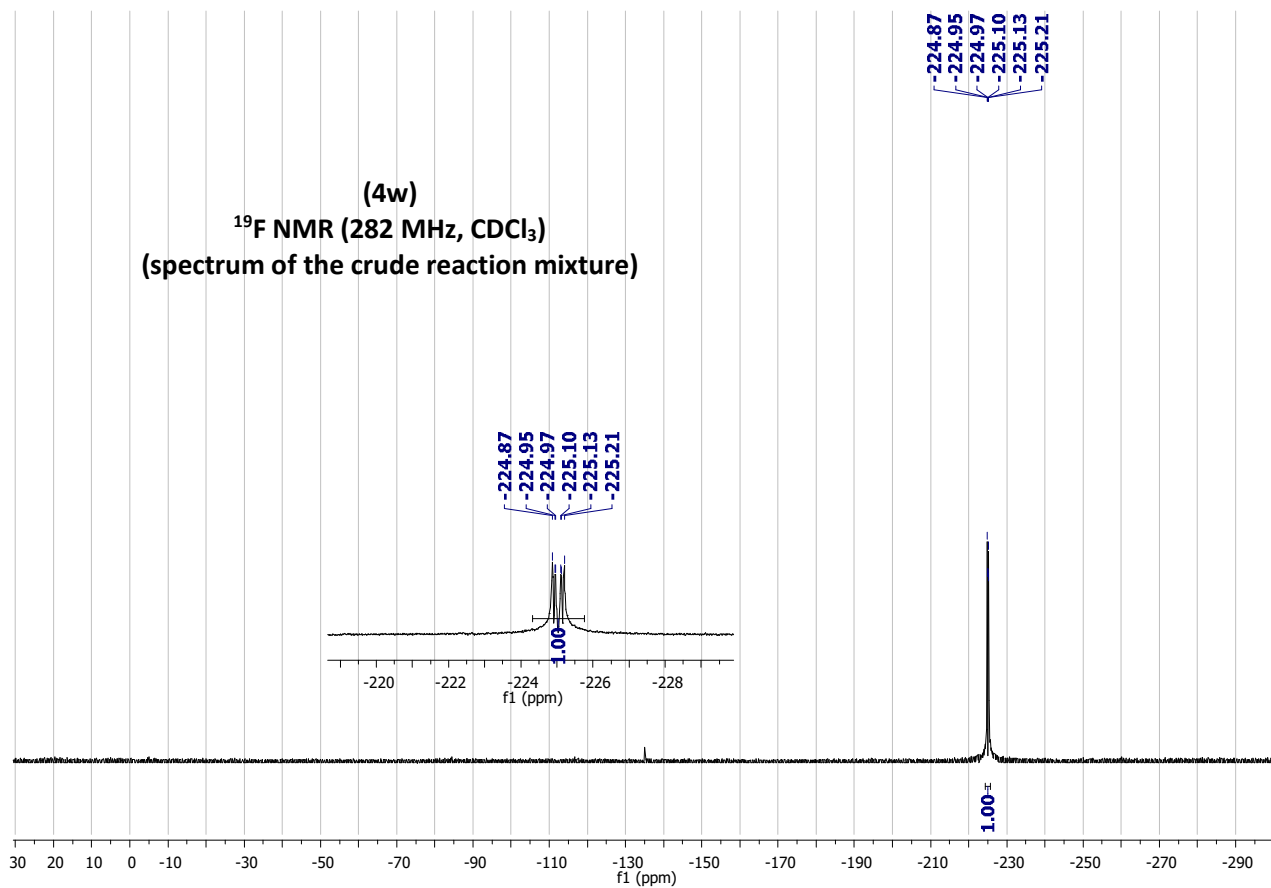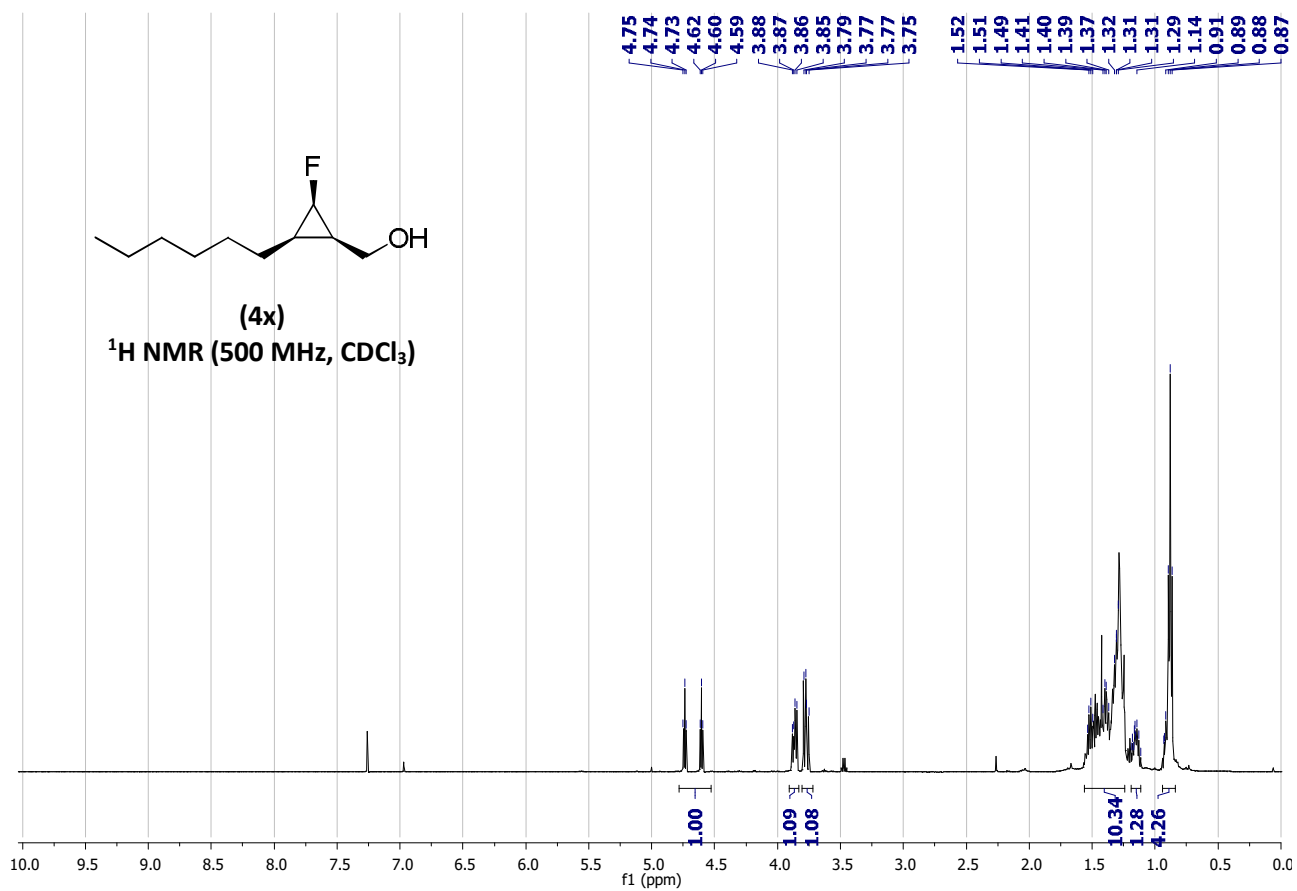

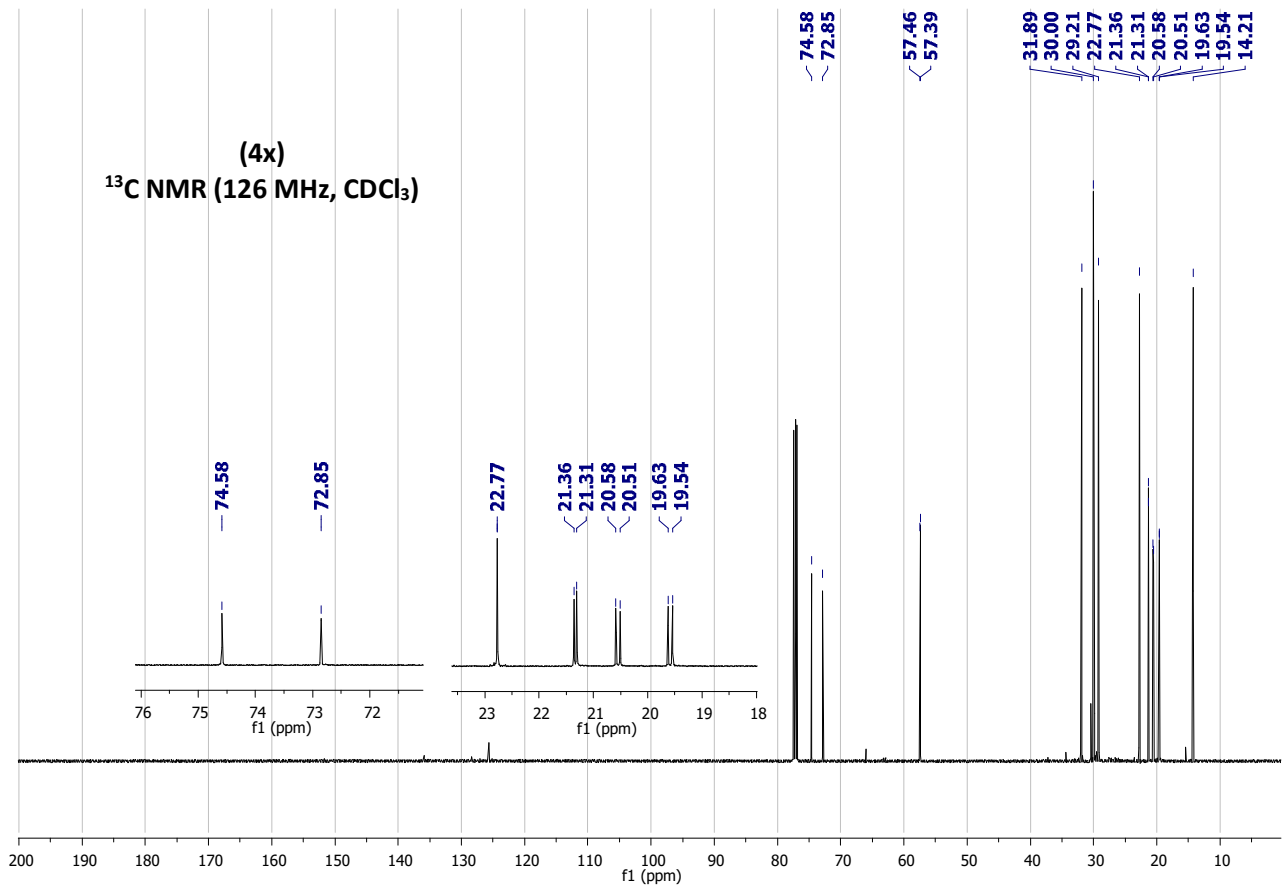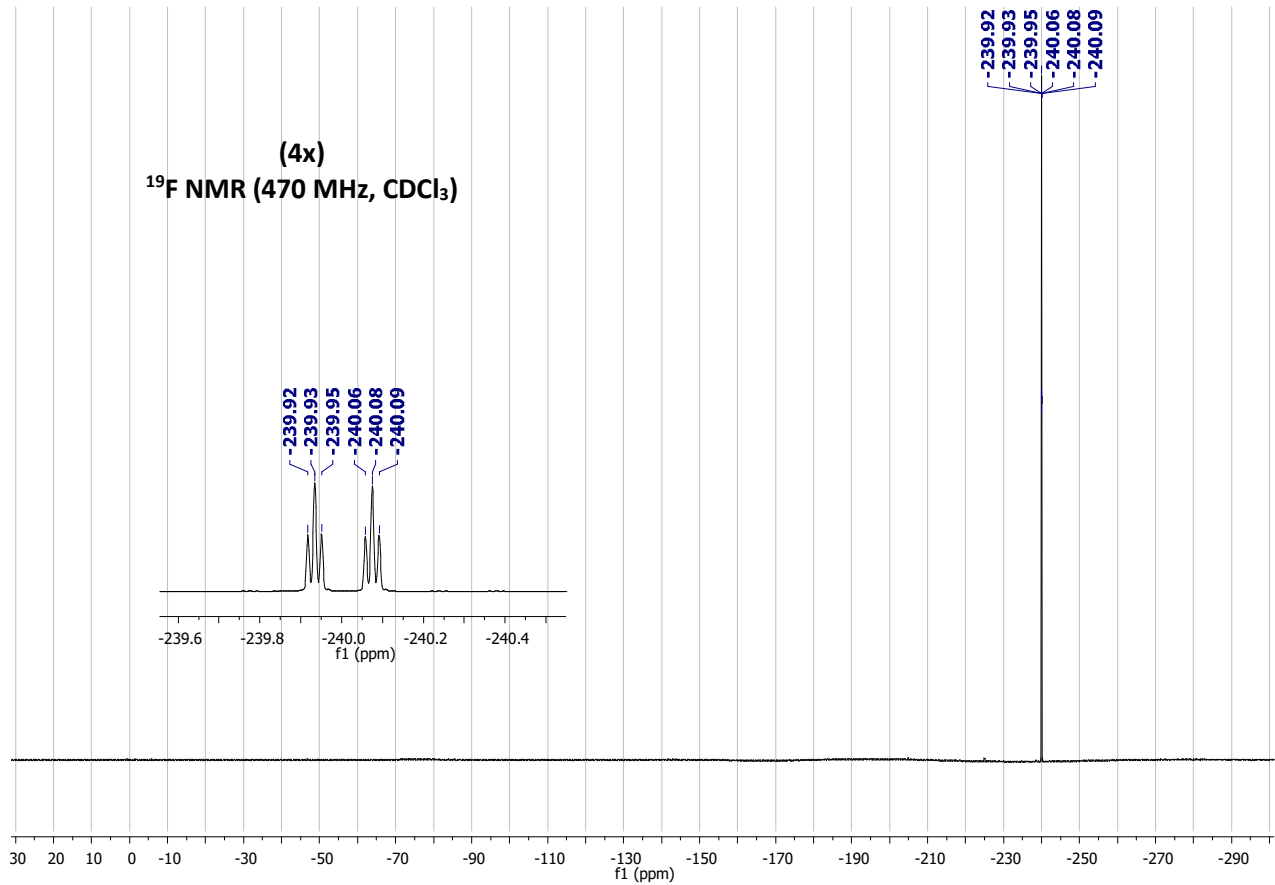

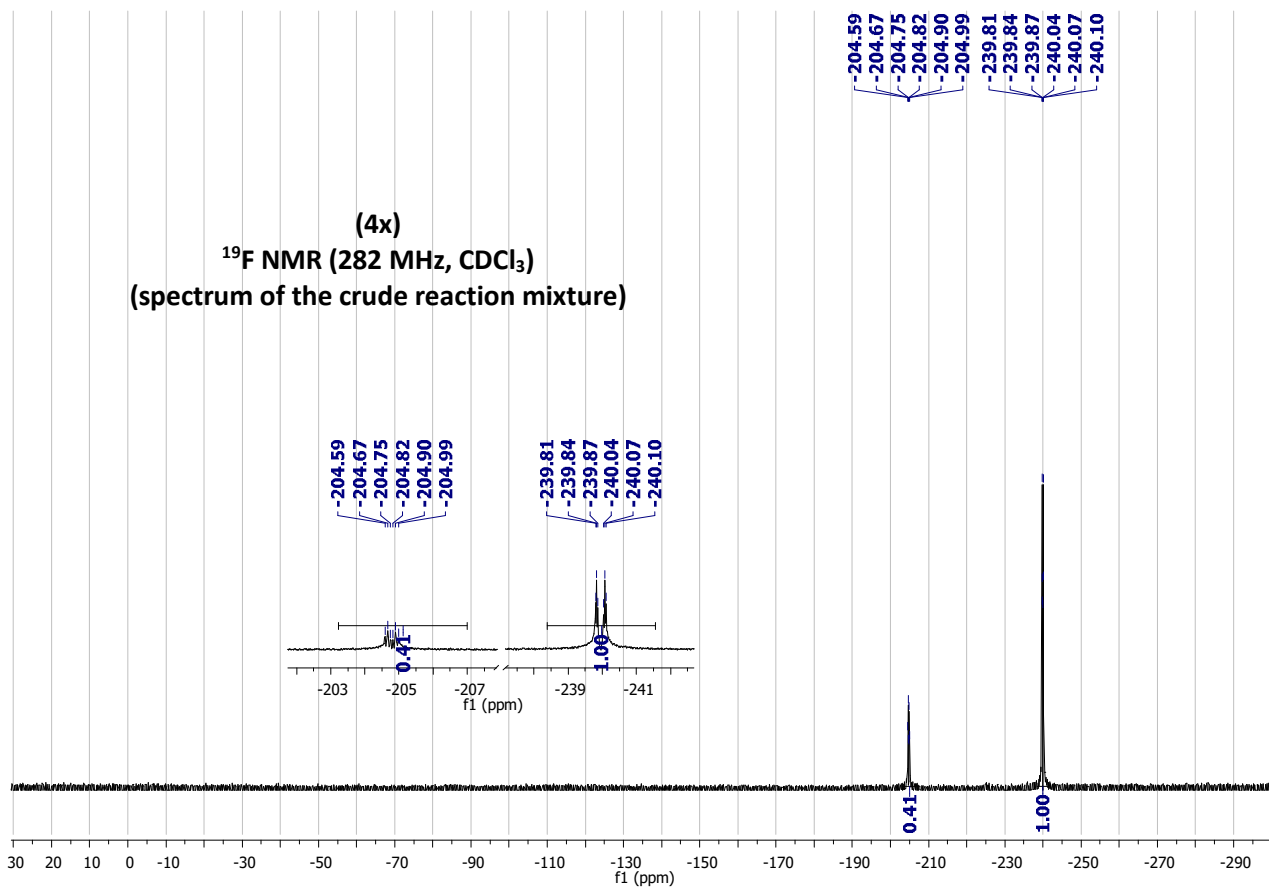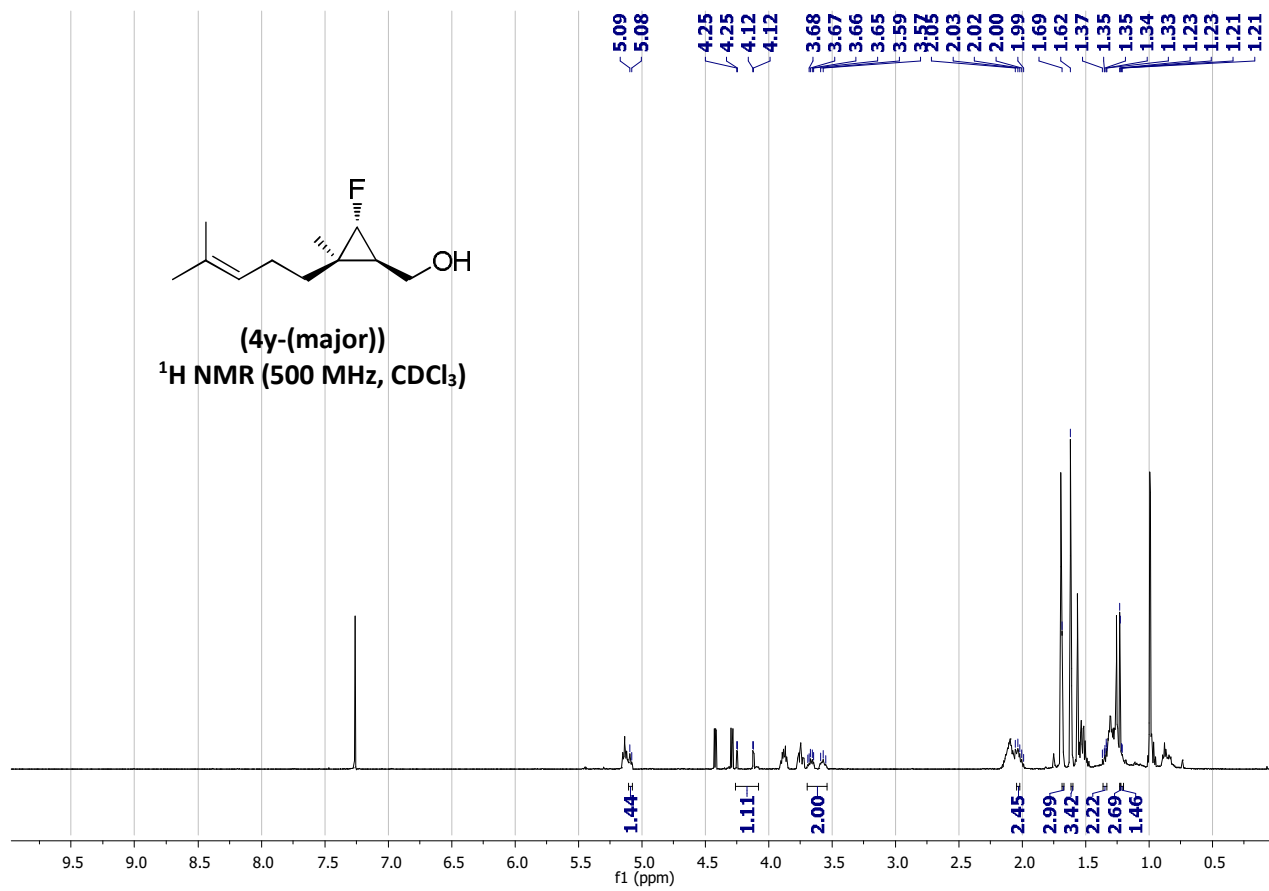

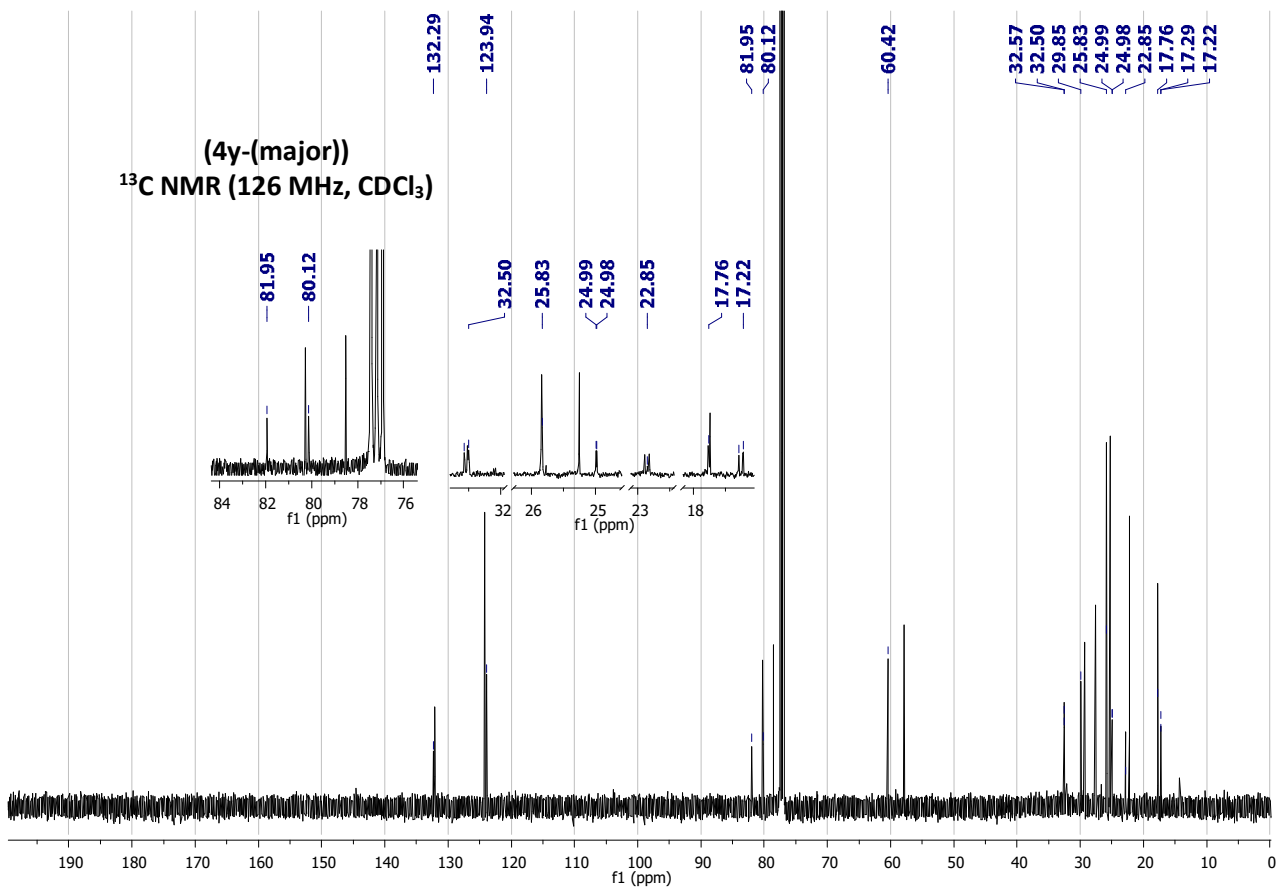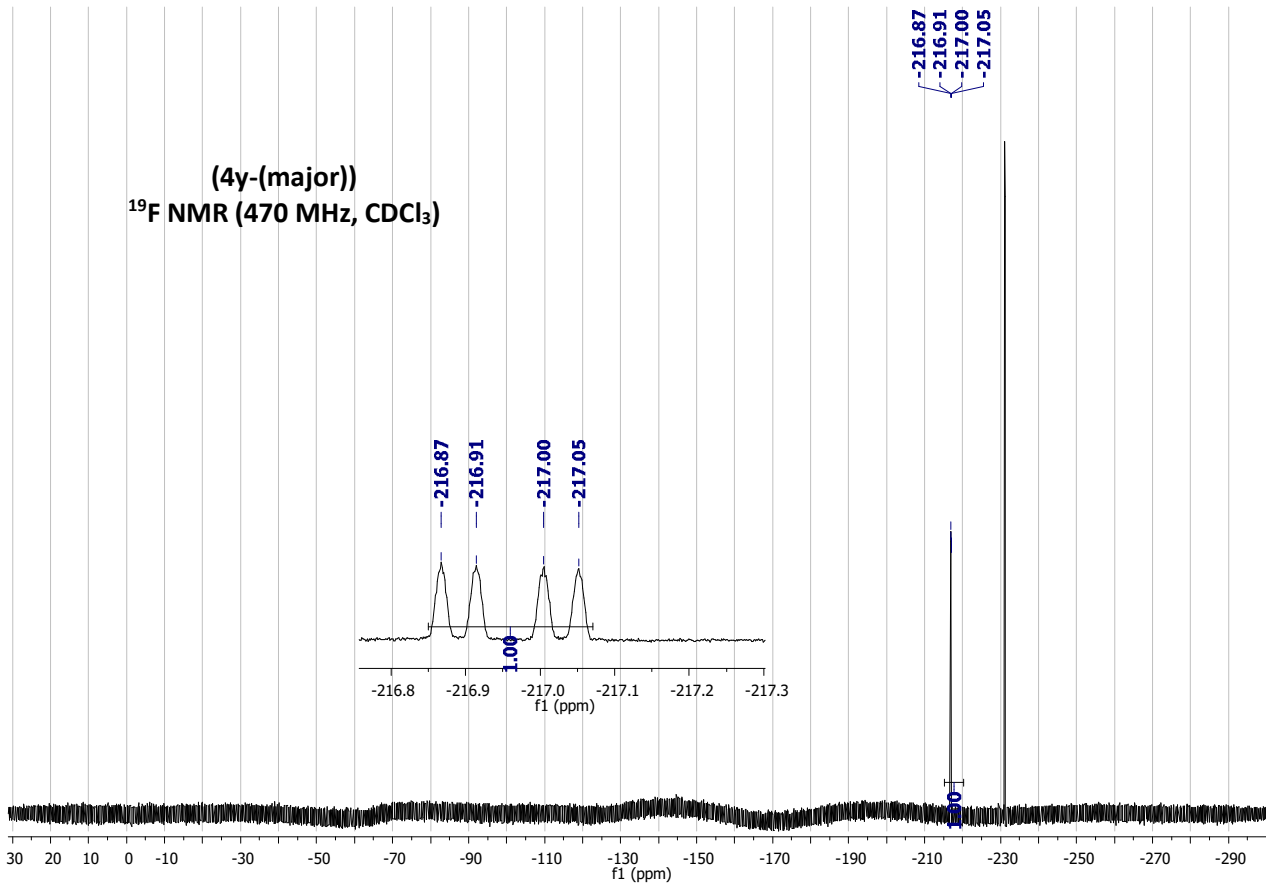

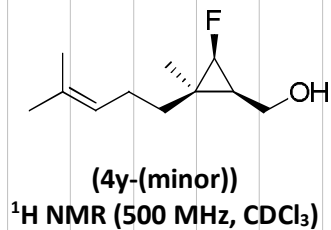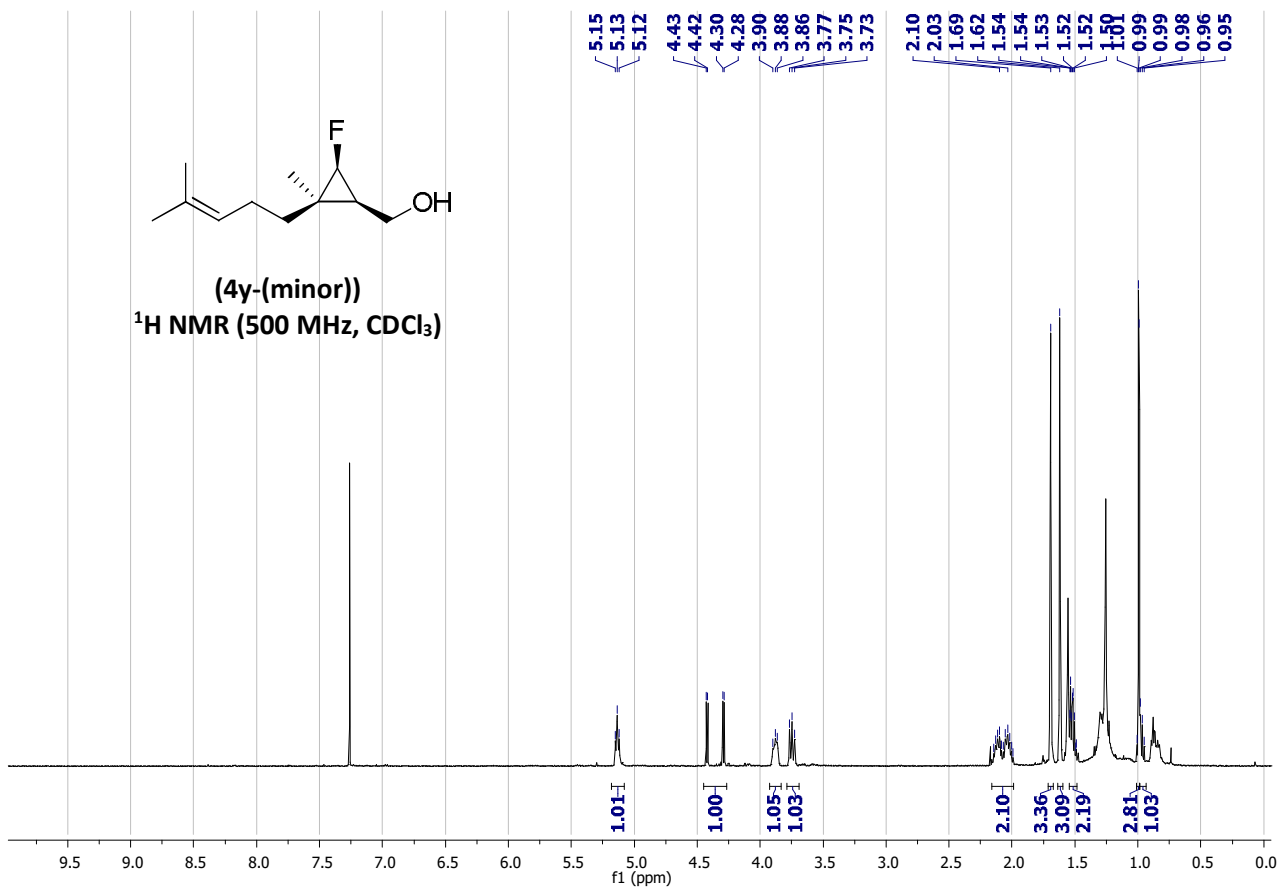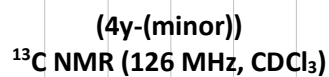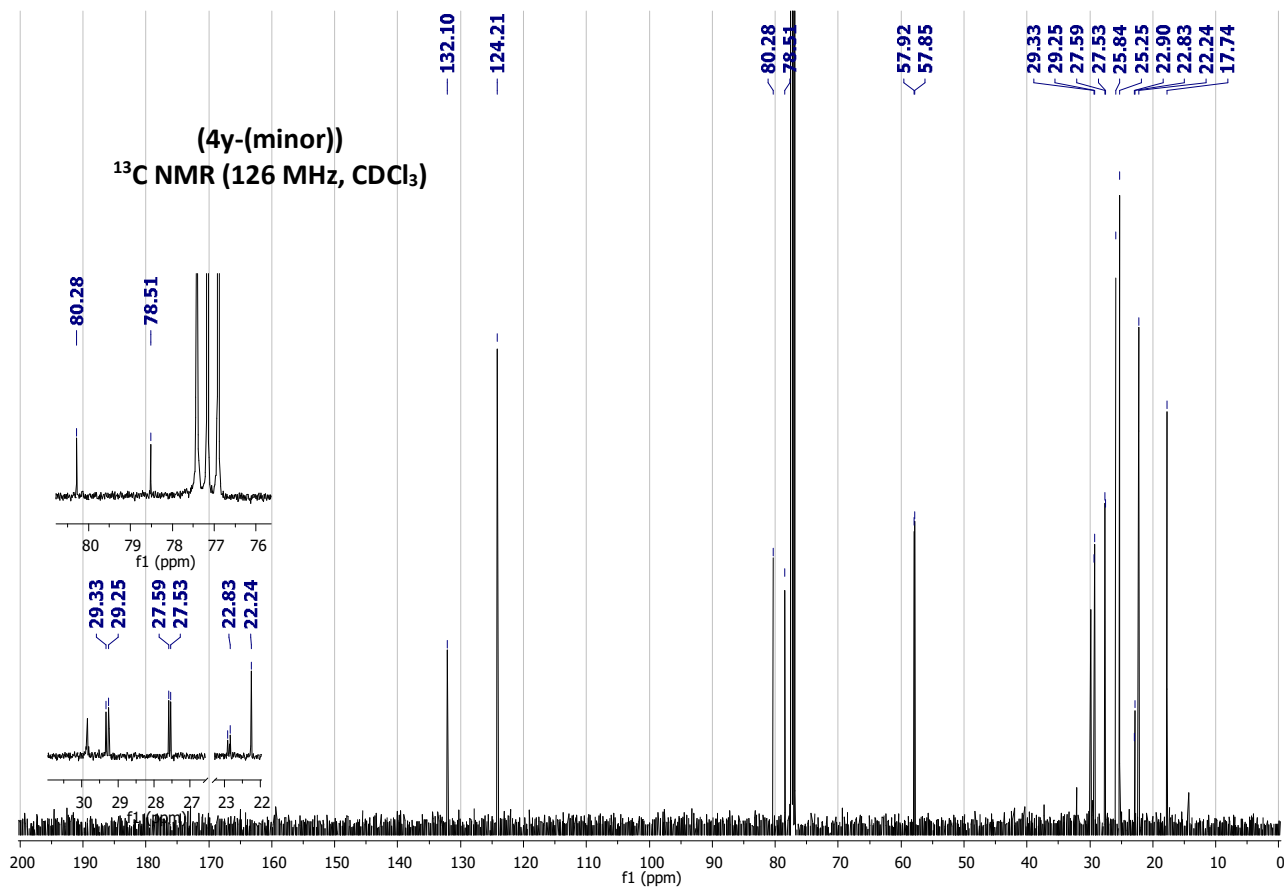



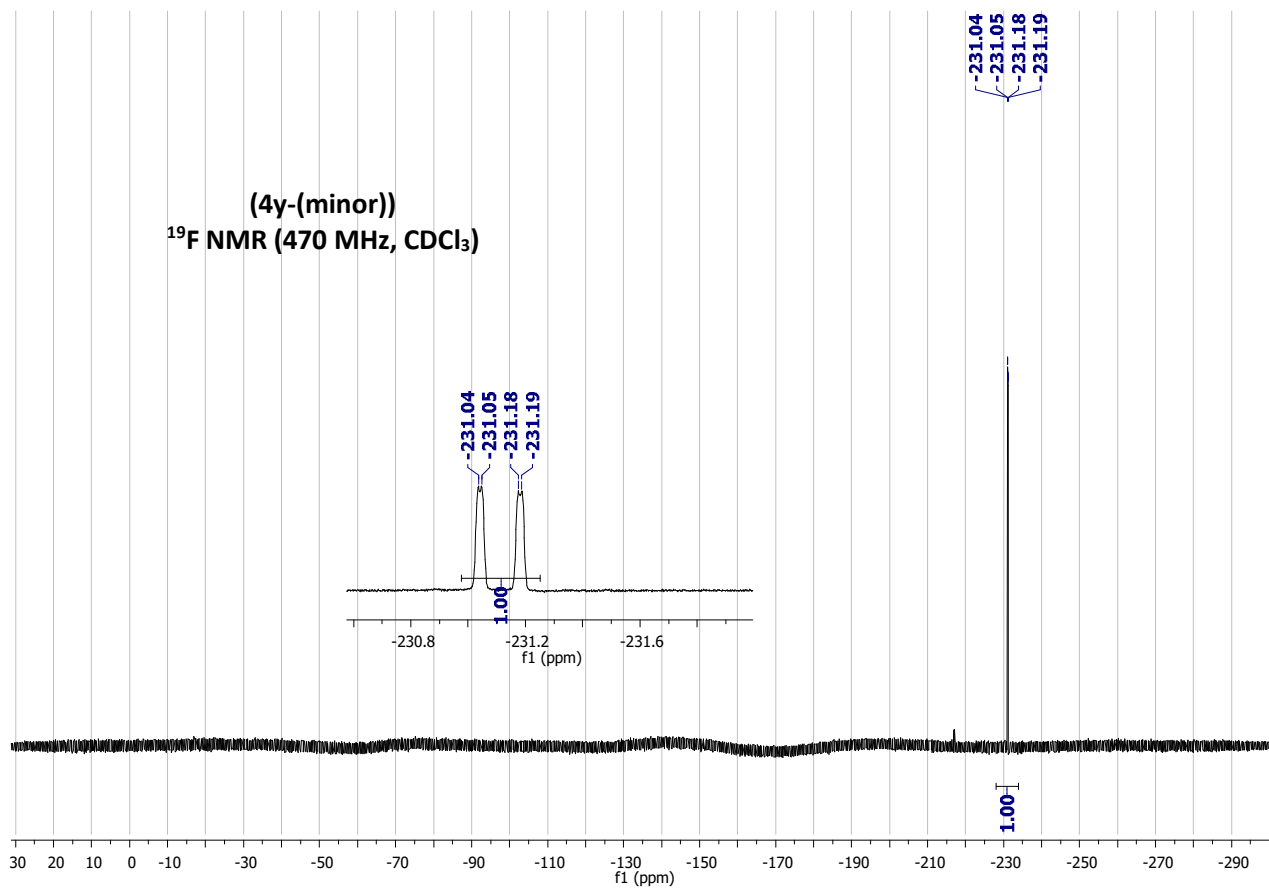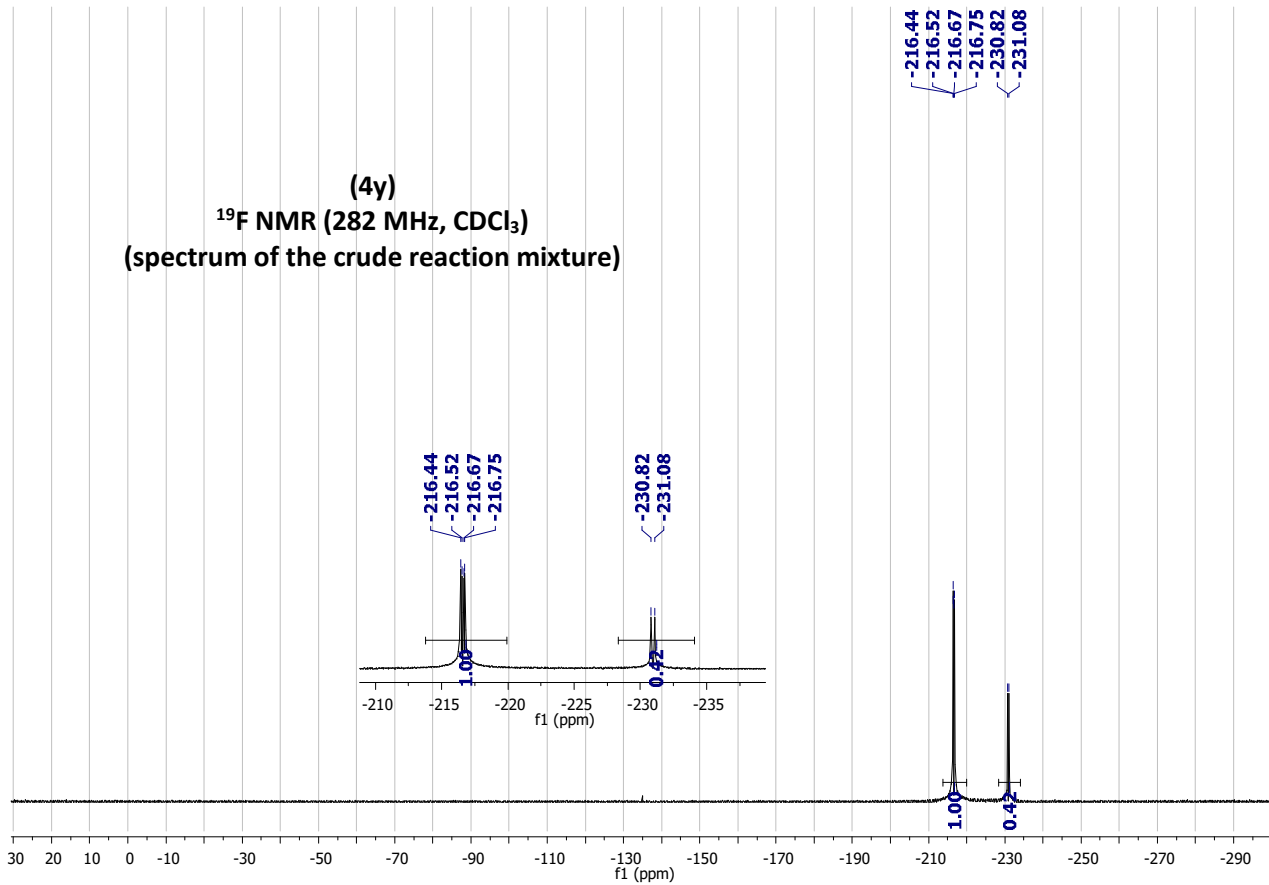

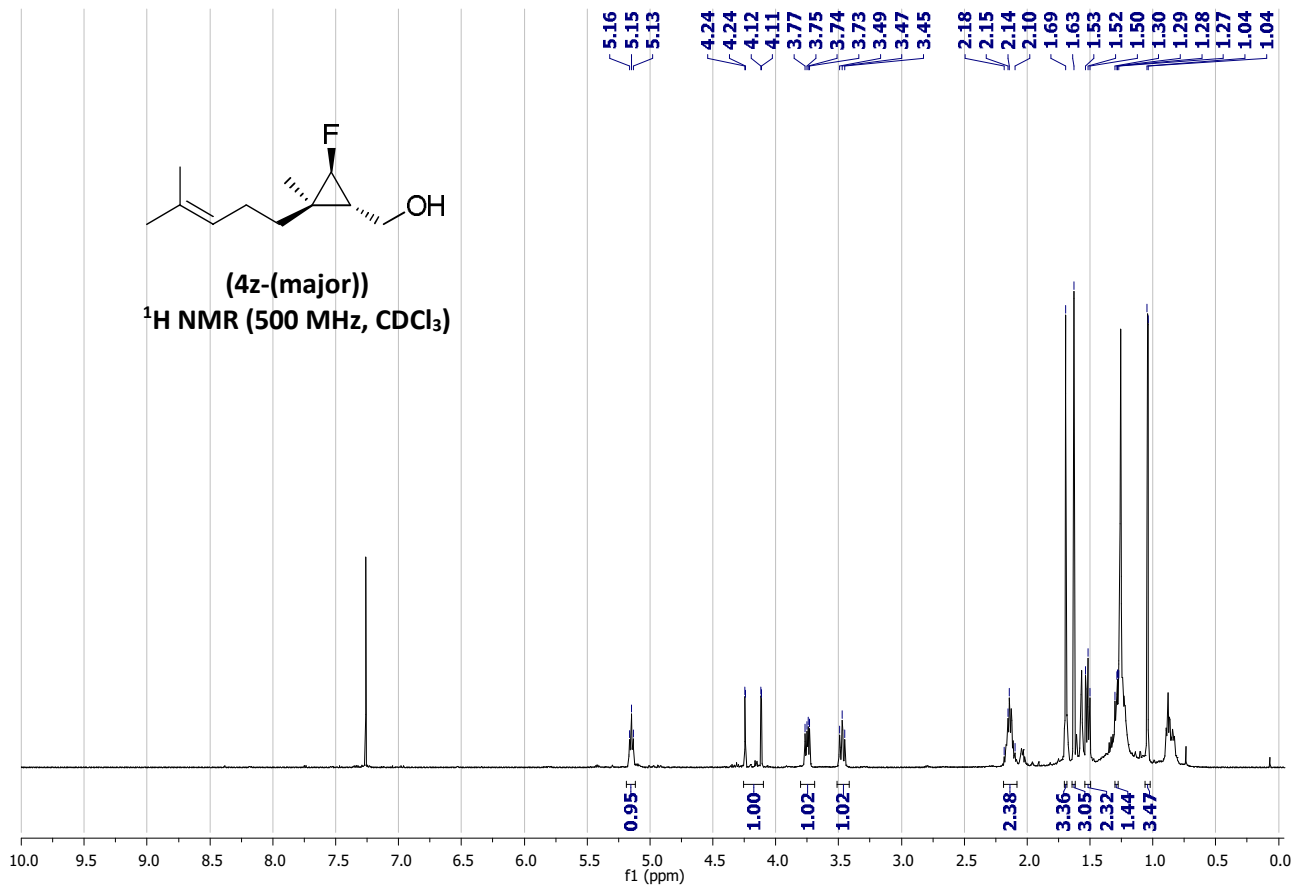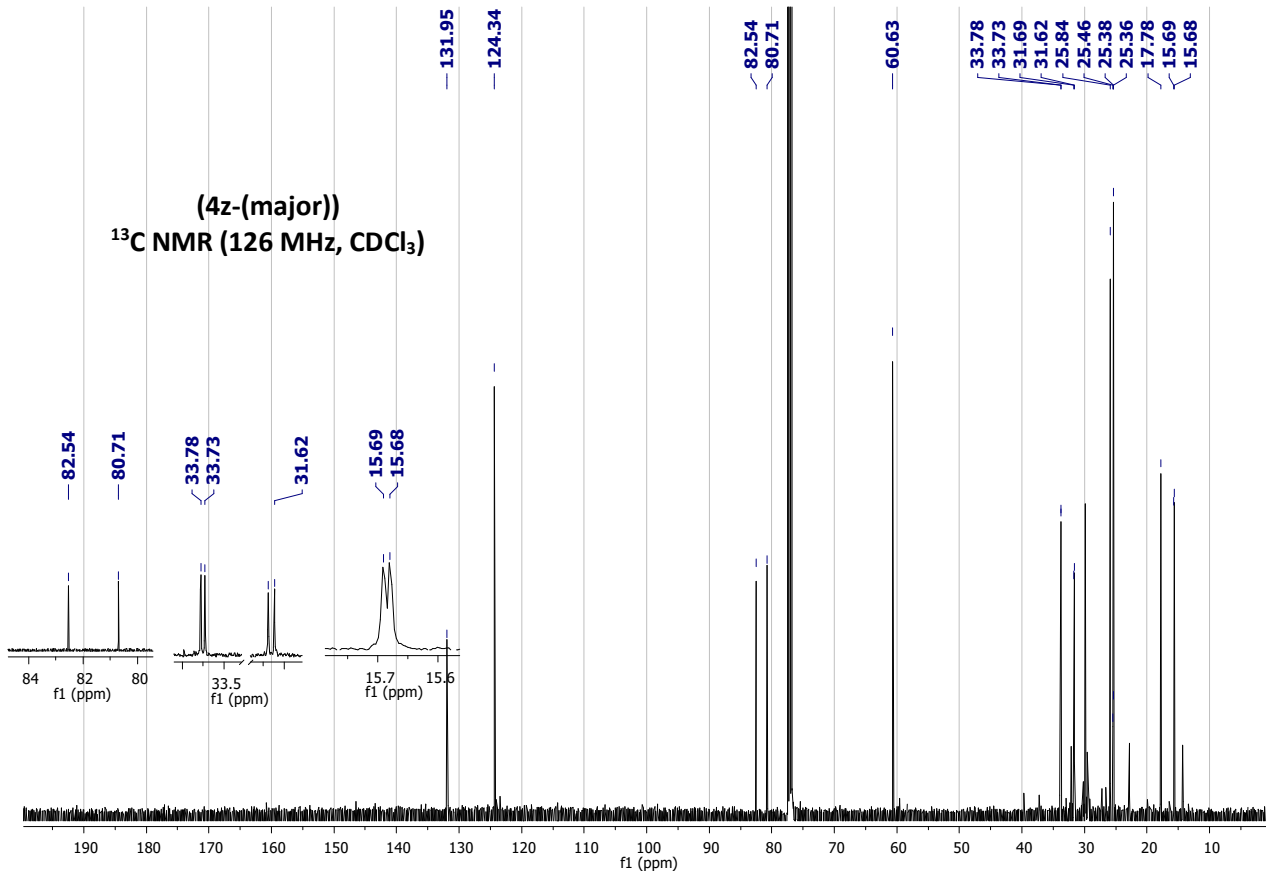

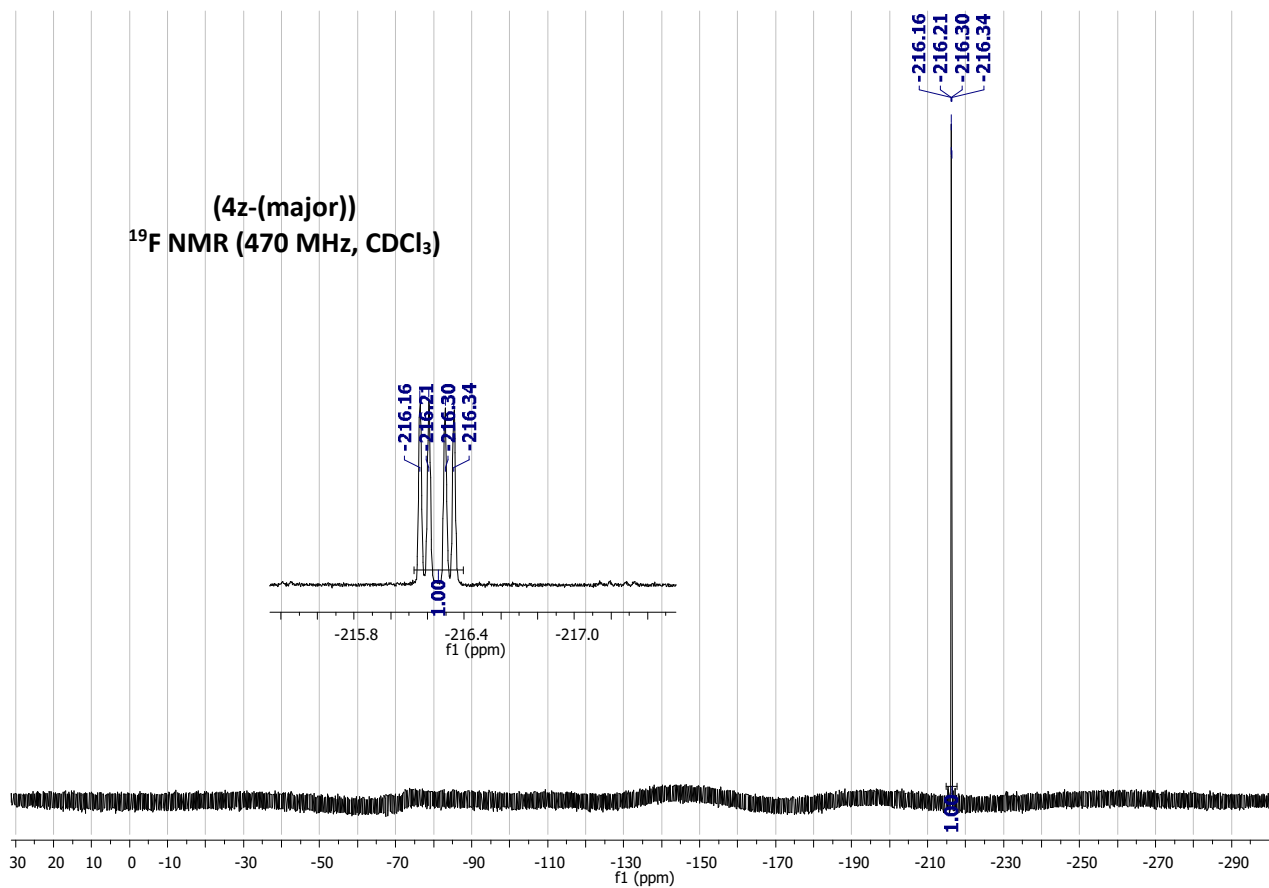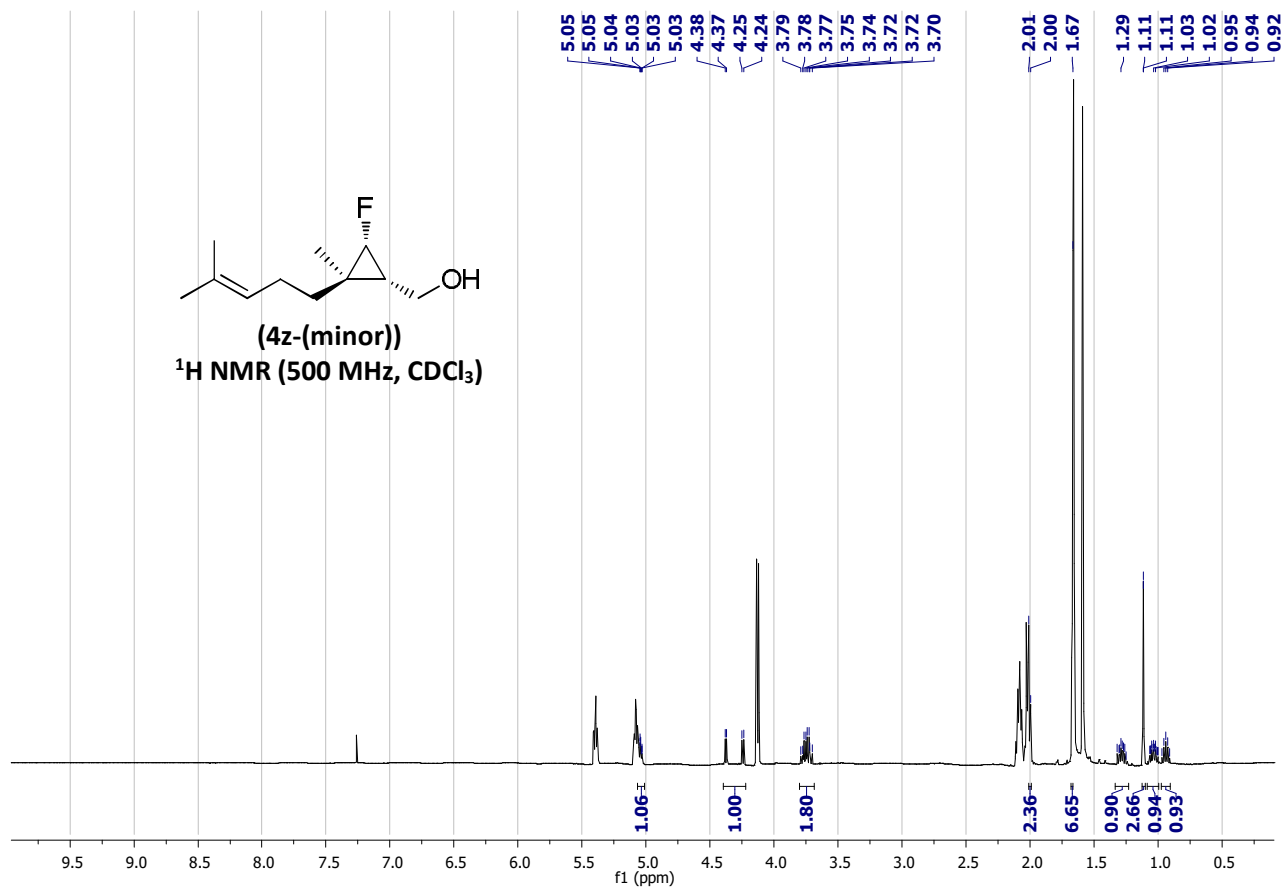

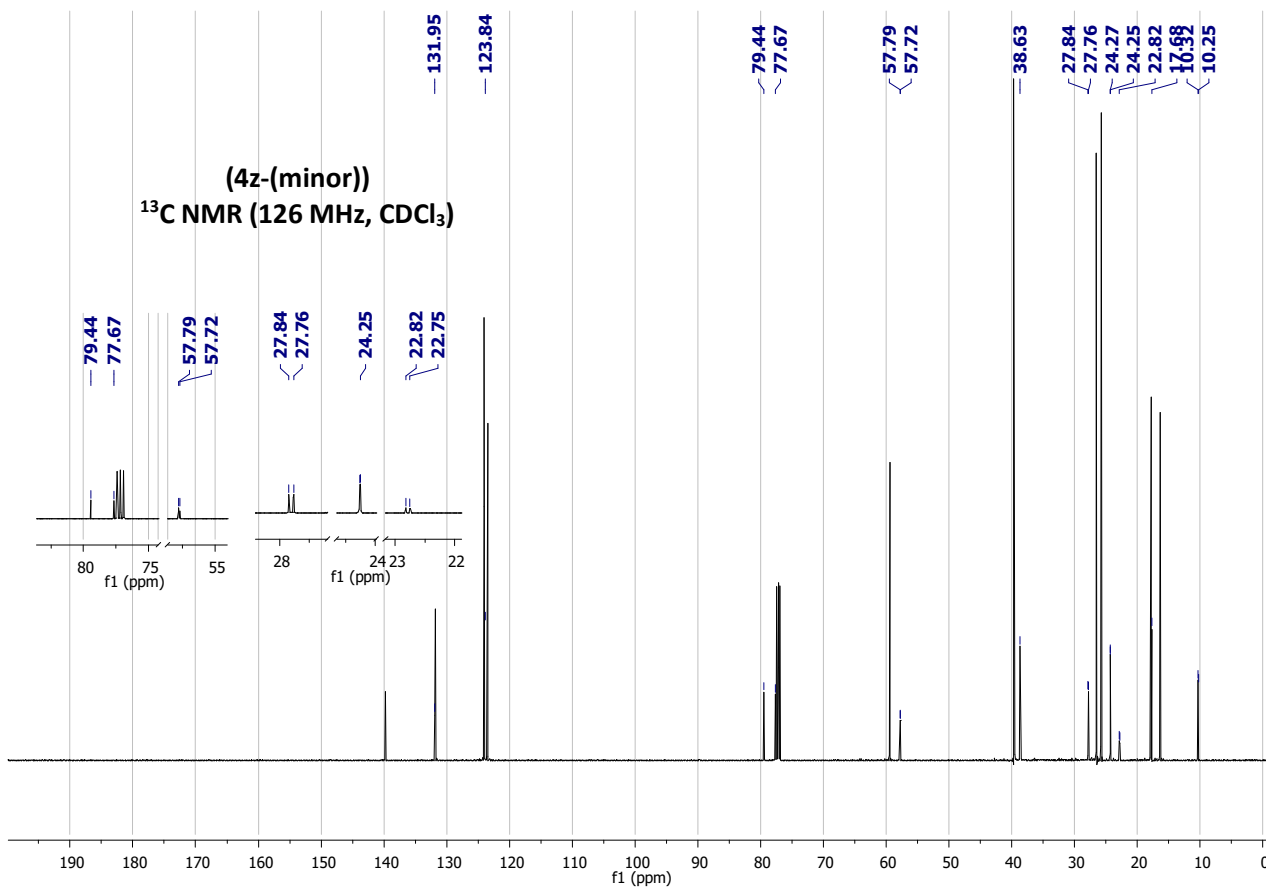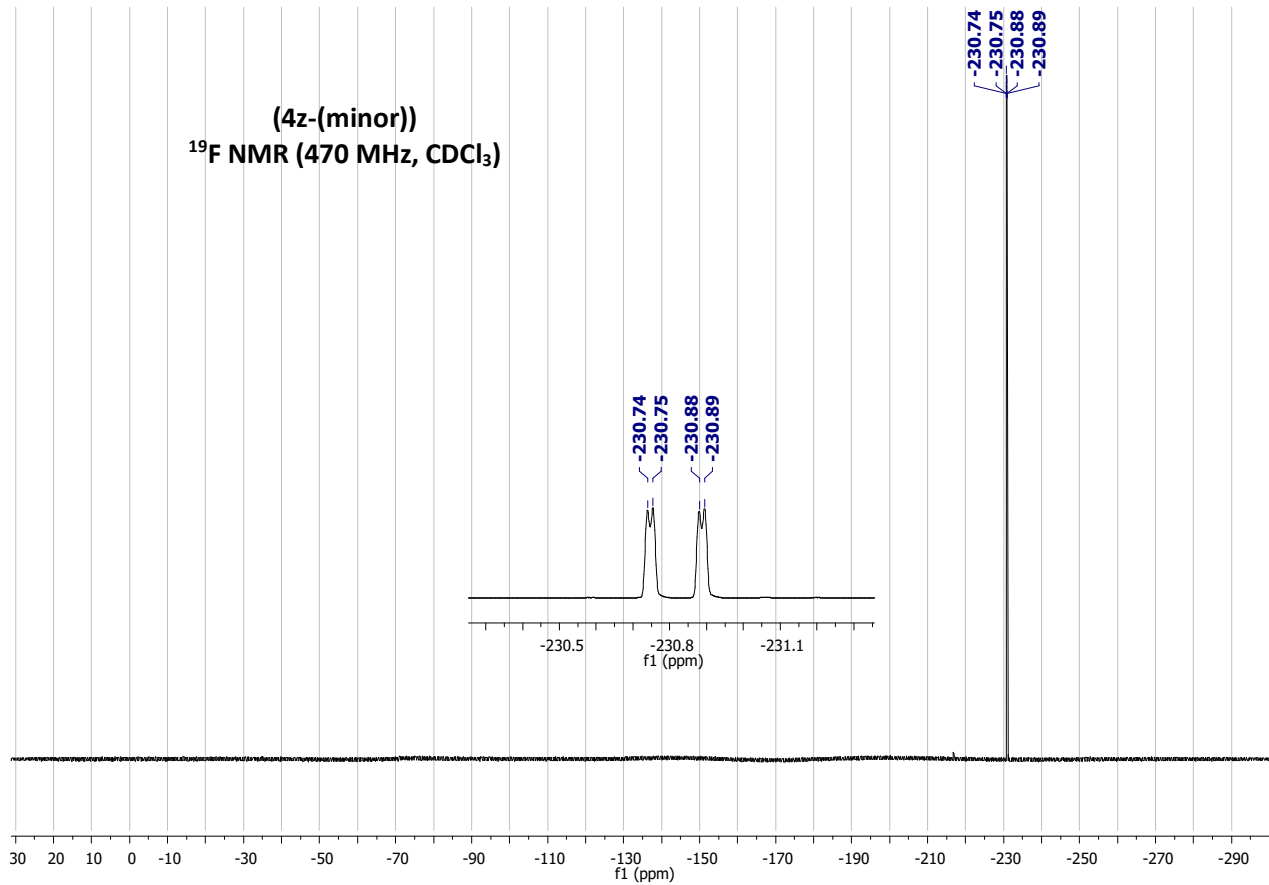

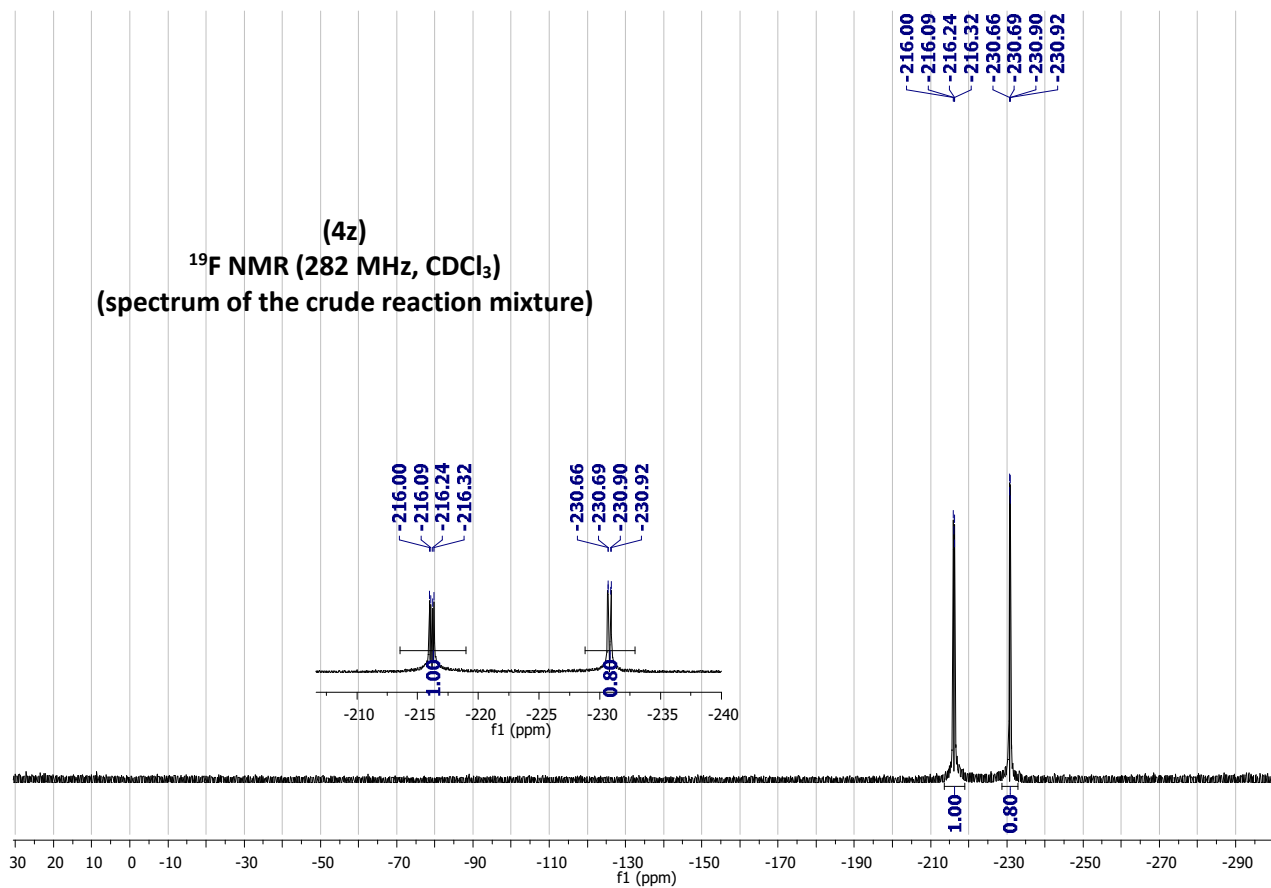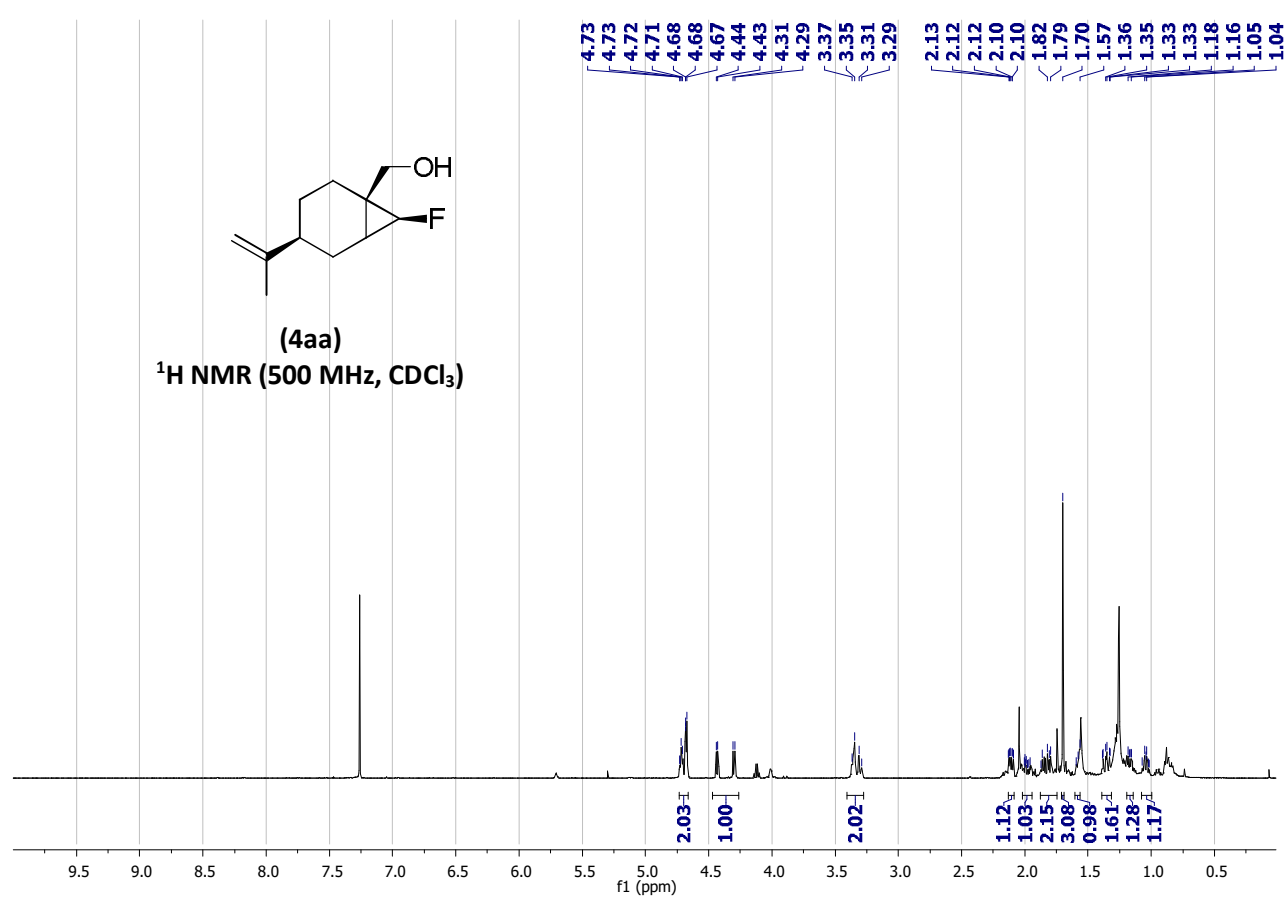

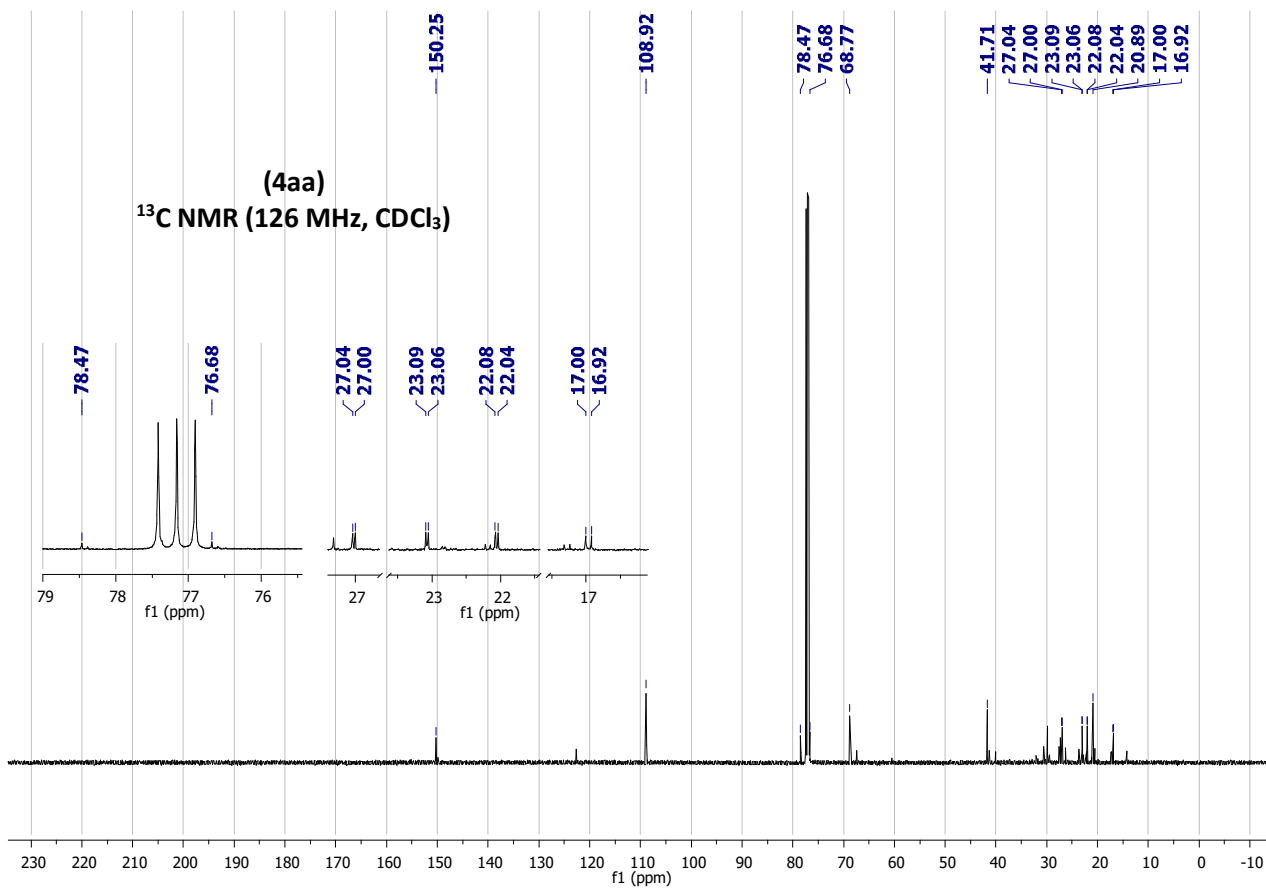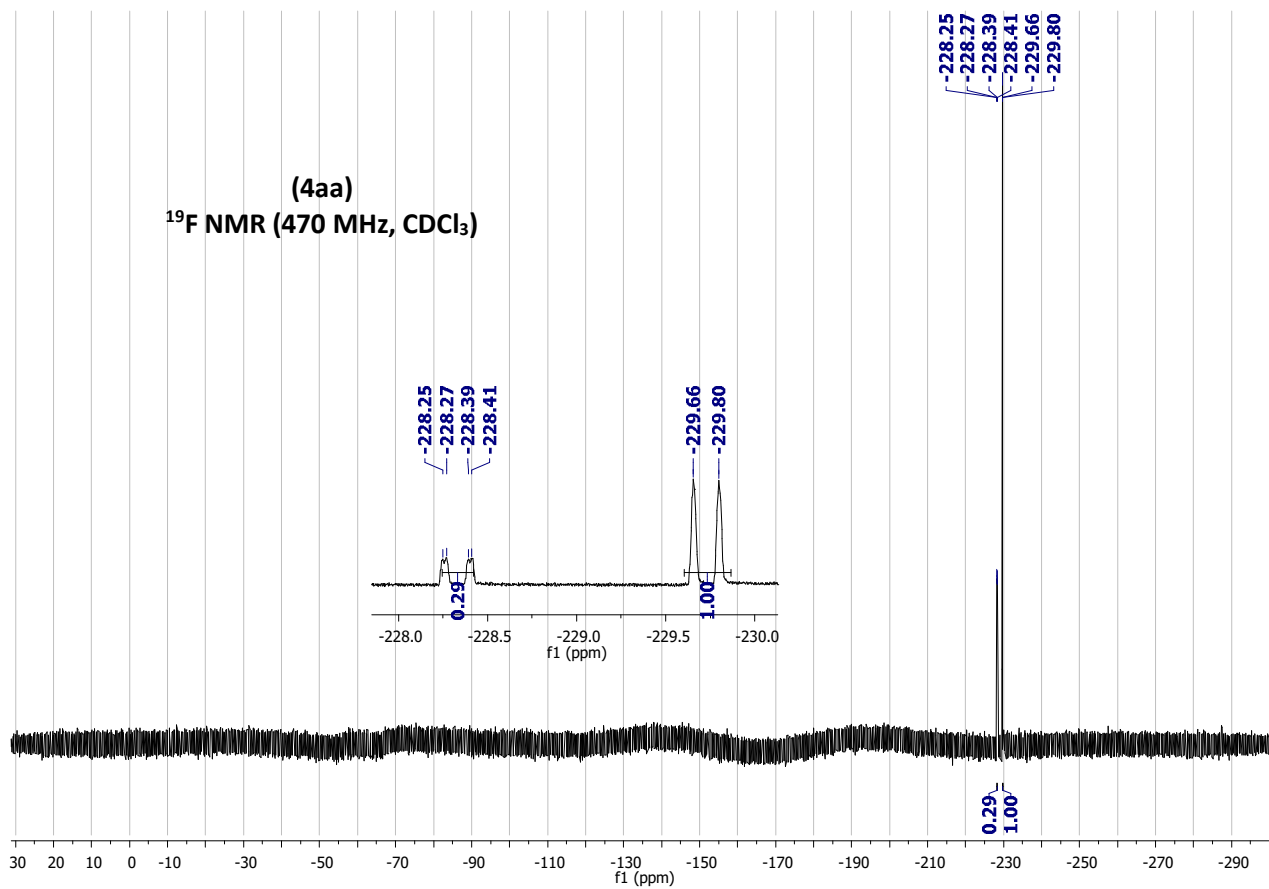

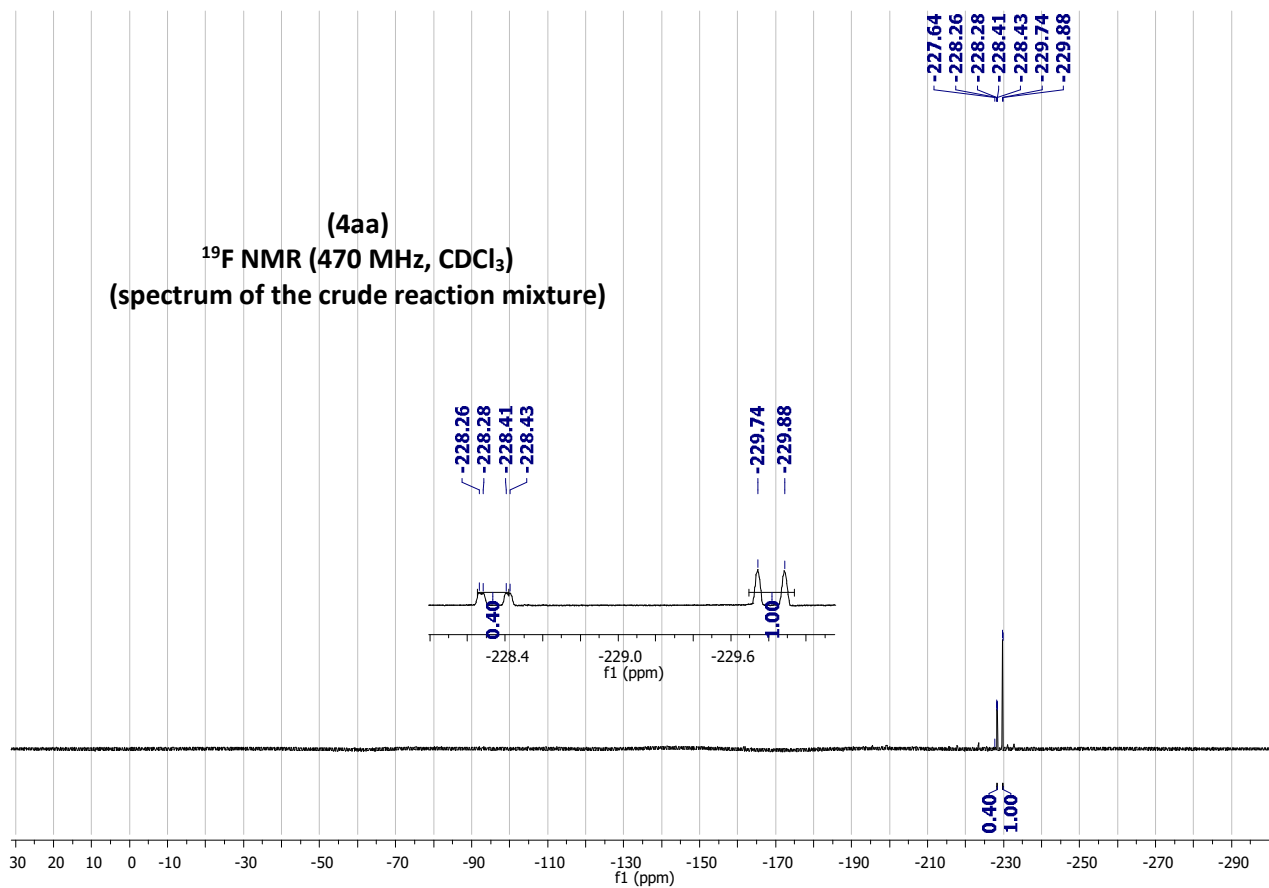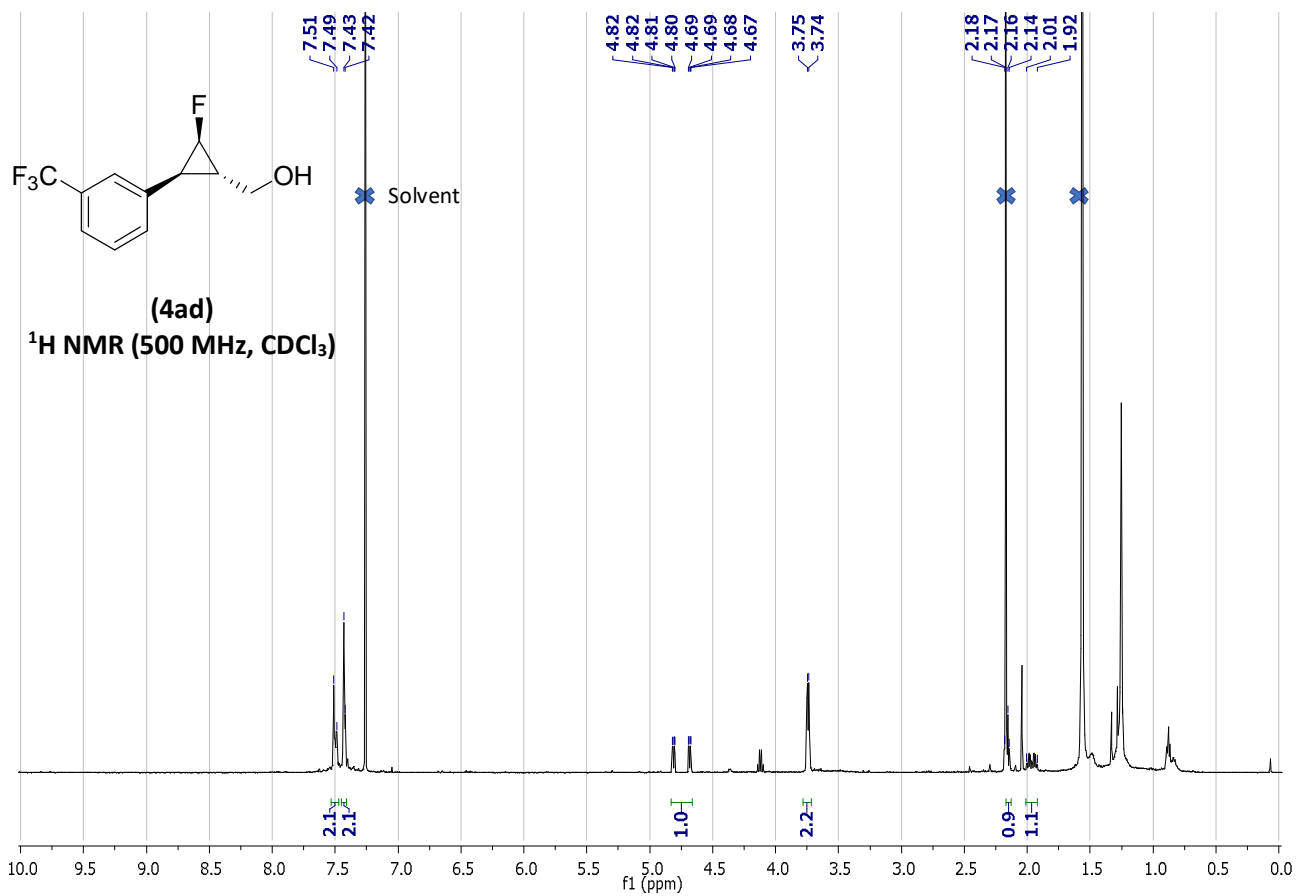

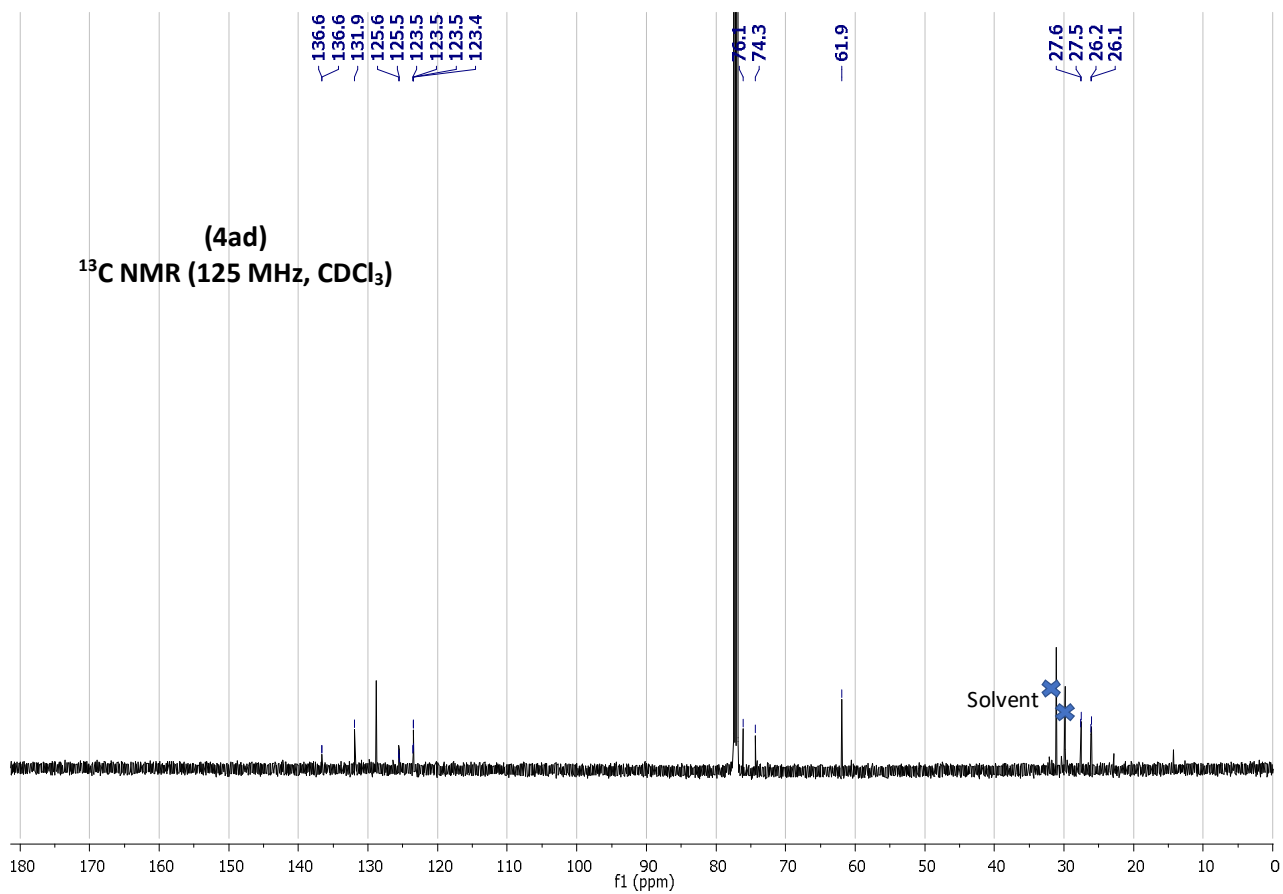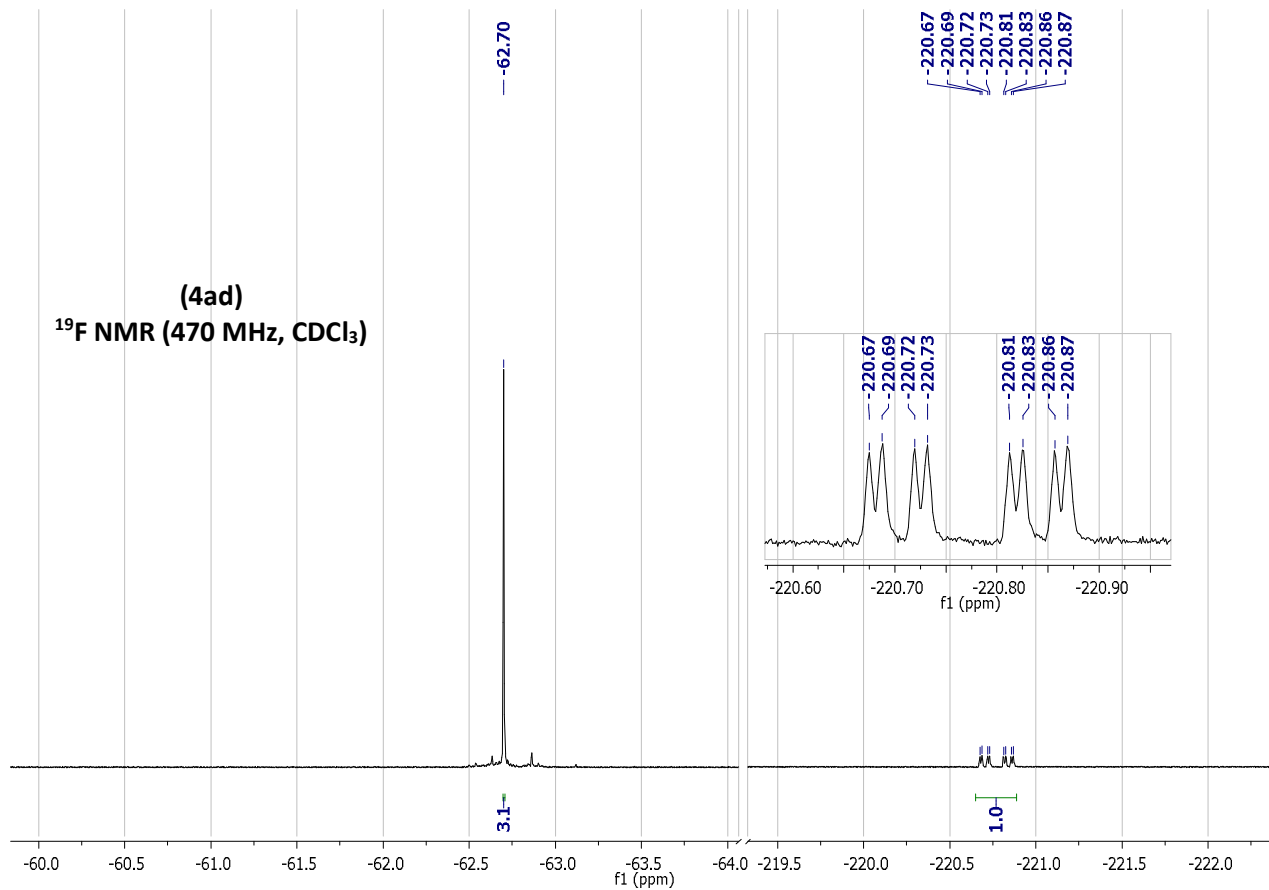



- 
- <sup>1</sup> T. Schiefer, *J. Med. Chem.* **2018**, *61*, 4593–4607.
- <sup>2</sup> V. Pace, L. Castoldi, P. Hoyos, J. V. Sinisterra, M. Pregnotato, J. Sánchez-Montero, *Tetrahedron*, **2011**, *67*, 2670–2675.
- <sup>3</sup> M. Nardi, G. Sindona, P. Costanzo, M. Oliviero, A. Procopio, *Tetrahedron*, **2015**, *71*, 1132–1135.
- <sup>4</sup> Li Chunsheng, Chen Huoji, Li Jianxiao, Li Meng, Liao Jianhua, Wu Wanqing, Jiang Huanfeng, *Adv. Synth. and Cat.*, **2018**, *360*, 1600–1604.
- <sup>5</sup> S. Elangovan, C. Topf, S. Fischer, H. Jiao, A. Spannenberg, W. Baumann, R. Ludwig, K. Junge, M. Beller, *JACS*, **2016**, *138*, 8809–8814.
- <sup>6</sup> R. Meib, K. Kumar, H. Waldmann, *Chemistry*, **2015**, *21*, 13526–13530.
- <sup>7</sup> Yasuda Shigeo, Kumagai Naoya, Shibasaki Masakatsu, *Heterocycles*, **2012**, *86*, 745–757.
- <sup>8</sup> D. Craig, N. K. Slavov, *Chem. Comm.*, **2008**, *45*, 6054–6056.
- <sup>9</sup> G. Y. Fang G. Y., Olov A. Wallner, N. Di Blasio, X. Ginesta, J. N. Harvey, V. K. Aggarwal, *J. Am. Chem. Soc.*, **2007**, *129*, 14632–14639.
- <sup>10</sup> M. Nishizwa, *E. J. Org. Chem.*, **2011**, *13*, 2417–2420.
- <sup>11</sup> T. N. Grant, F. G. West, *J. Am. Chem. Soc.*, **2006**, *128*, 9348–9349.
- <sup>12</sup> E. Brenna, M. Crotti, M. De Pieri, F. G. Gatti, G. Manenti, D. Monti, *Adv. Synth. and Catal.*, **2018**, *360*, 3677–3686.
- <sup>13</sup> Yahata Kenzo, Minami Masaki, Watanabe Kei, Fujoka Hirocmichi, *Organic Letters*, **2014**, *16*, 3680–3683.
- <sup>14</sup> T. V. K. Reddy, A. Jyotsna, B.L.A Prabhavathi Devi, R.B.N. Prasad, Y. Poornachandra, C. Ganesh Kumar, *Eur. J. Med. Chem.*, **2016**, *120*, 86–96.
- <sup>15</sup> Y-G. Chen, B. Shuai, C. Ma, X-J. Zhang, P. Fang, T.-S. Mei, *Organic Letters*, **2017**, *19*, 2969–2972.
- <sup>16</sup> M.-H. Yang, D. L. Orsi, R. A. Altman, *Angewandte Chemie International Edition* **2015**, *54*, 2361–2365.
- <sup>17</sup> C. Navuluri, A. B. Charette, *Org. Lett.*, **2015**, *17*, 4288–4291.
- <sup>18</sup> E. J. Corey, R. K. Bakshi, *Tetrahedron Letters*, **1990**, *31*, 611–614.
- <sup>19</sup> Parr, R. G.; Yang, W. *Density-Functional Theory of Atoms and Molecules*; Oxford University Press, U.K., **1989**.
- <sup>20</sup> Frisch, M. J.; Trucks, G. W.; Schlegel, H. B.; Scuseria, G. E.; Robb, M. A.; Cheeseman, J. R.; Scalmani, G.; Barone, V.; Mennucci, B.; Petersson, G. A.; Nakatsuji, H.; Caricato, M.; Li, X.; Hratchian, H. P.; Izmaylov, A. F.; Bloino, J.; Zheng, G.; Sonnenberg, J. L.; Hada, M.; Ehara, M.; Toyota, K.; Fukuda, R.; Hasegawa, J.; Ishida, M.; Nakajima, T.; Honda, Y.; Kitao, O.; Nakai, H.; Vreven, T.; Montgomery Jr., J. A.; Peralta, J. E.; Ogliar, F.; Bearpark, M.; Heyd, J. J.; Brothers, E.; Kudin, K. N.; Staroverov, V. N.; Keith, T.; Kobayashi, R.; Normand, J.; Raghavachari, K.; Rendell, A.; Burant, J. C.; Iyengar, S. S.; Tomasi, J.; Cossi, M.; Rega, N.; Millam, J. M.; Klene, M.; Knox, J. E.; Cross, J. B.; Bakken, V.; Adamo, C.; Jaramillo, J.; Gomperts, R.; Stratmann, R. E.; Yazyev, O.; Austin, A. J.; Cammi, R.; Pomelli, C.; Ochterski, J. W.; Martin, R. L.; Morokuma, K.; Zakrzewski, V. G.; Voth, G. A.; Salvador, P.; Dannenberg, J. J.; Dapprich, S.; Daniels, A. D.; Farkas, O.; Foresman, J. B.; Ortiz, J. V.; Cioslowski J.; Fox, D. J. *Gaussian 09*, revision E.01; Gaussian, Inc.; Wallingford, CT, **2013**.
- <sup>21</sup> Denningtom, R.; Keith, T.; Millam, J. *GaussView*, version 5; Semichem Inc.: Shawnee Mission, KS, **2009**.
- <sup>22</sup> Becke, A. D. *J. Chem. Phys.*, **1993**, *98*, 5648–5652.
- <sup>23</sup> Becke, A. D. *J. Chem. Phys.*, **1993**, *98*, 1372–1377.
- <sup>24</sup> Lee, C.; Yang, W.; Parr, R. G. *Phys. Rev. B*, **1988**, *37*, 785–789.
- <sup>25</sup> Stephens, P. J.; Devlin, F. J.; Chabalowski, C. F.; Frisch, M. J. *J. Chem. Phys.*, **1994**, *98*, 11623–11627.
- <sup>26</sup> Check, C. E.; Faust, T. O.; Bailey, J. M.; Wright, B. J.; Gilbert, T. M.; Sunderlin, L. S. *J. Phys. Chem. A*, **2001**, *105*, 8111–8116.
- <sup>27</sup> Mennucci, B.; Cancès, E.; Tomasi, J. *J. Phys. Chem. B*, **1997**, *101*, 10506–10517.
- <sup>28</sup> Tomasi, J.; Mennucci, B.; Cammi, R.; *Chem. Rev.*, **2005**, *105*, 2999–3094.
